# Supplementary material
Source: publisher figshare collection journal article supplement (https://gsajournals.figshare.com/ndownloader/files/26579612)
Supplement: Supplementary file 1 [file 26579612]

>tig00000001 len=4989389 reads=13941 class=contig suggestRepeat=no suggestBubble=no suggestCircular=yes trim=27064-4968900
CAACGGCACCTGATACAGCCCTGTGGCCTCCAGATTATCCAGATAGAGATTCTGACCGTTACGCCACCAGTCATCCTCACGATGAAAATCCGGCATCTCA
ATCCCCGCCAGATGGTAAGCGTCCCGGAACAGCGTGTAACAGTCCGTCACCCCGTGCTCAAAGCGCCGCCCGGTAAGATGTGGCACACAGCGGAACTTGT
GAATCGCCCCCGGCAGACCAGCCACCACGGCAAATCACTCTGCACCTGCAACCGCCGGTCAGCCTCACTCAGCCAGGGCAGACCACCGGGGTGGCTGTGG
ACCAGCGCCACAATCTCACCCTGCATCTCTGCCTGCAGCCAGTCCTCCGGAGCCATCCGGAAATAATCCTCCGGCTCACCGGAAATATTCACGCAGGGAA
AATATCTTTCCCCCTCCGGCGTTCTCACCACGAAGCCGCACGACTCCGCTGGCGCACATCGCCGGGCGTGCGCCAGAATCGCTGATTCTGTCTCTGTCAT
GGGATTTACTGCGAAAGTTTGTTAATGGAAAGGAAGCCGCCAAAGTTGCCGACGTTATTGCGAAACTTACAACCGCTCAGGCATTTGCTGCATTTATCCT
TCGTGATATCGGACGTTGGCTGGTCATATTCATCCGCGACCGCCGGACCGTGATAACCGCACTCACCGCCGCGATAGGTCCAGGTGCAGGTGTTGGCCAG
CATGATACGTCCCGGAAAAACAGCGCCGTCCGTTTCCGTCGGCGTGGACAGTACAAAGGAGGCACTGACCGCGCTCAGTTCGCTGCACTGCTCAATGCGC
CAGCGGCTGATCACCTCCTGCTCCGGATCGGCGTCACTGTTTCCGTTGACGAAGTTCACCGCATCCAGAAAACGGGCGTAAACCTTACGCCGGACCACCG
TTCCGCCGACCAGACTCTGCAGATCTTCCGCCATCCCGGTGACCATACCGTACAGGTTAGAAACCGTCAGCGTGGGGCGCGTACTGGTGCTTTTGCCATT
CAGTTCAAAACCACTCCCCTGAATGGGATACGGCTGATACTGTCGCCCCTGCCAGGTGACCGGCTCACCTTTTTCGTTCTGCTCATTACAGAAAAAATAA
CGTTCTCCACCGACCTCTGTCAGATCGATTTCCCAGAGCACCACGCTGGCCGACTGCTCCGCACGGGTGCATTCATTCAGTGTTTCCTGCCGGATATCCT
GCATCAGTTCACCACCTGTTTAAACTCTGCGCTGAACTCAACACGCAACATACTGACCTGCGACGACCATTTTGCGCAGGTCACCTTTATCTGCCTGTAA
CCATAAGGCGGCGTCCACAGAAAGGCCTTCCAGCCTCCGTGCTCTGCCAGAAACGACTCCAGCGCCGTGGCCTCCTCACGGGAGACAGACAGCGTCACGC
TGTACGTTTTCAGGTCAGCGTTCAGCCCGGCAGGCGCACGCTGGGAATAGCCATCACCAAAGCGCACCTCCCTGACGGAAGGAGCCGATGTCACATCCAT
CCCGGGTTTCACTTTCCAGCGGAAGGTTTTCATCGTCCACCTCCGGAGAACAGACCACCATCGCGCATCTGCCCGGTCACAACATCCATTGCCGCCTTAC
GGGCTACGTCATAAACAGCCTTCAGCGCCTGTGGCCCTATCTGCCCGTTCGTGCCGTCGTTGTTAATCACCACATGGTTATTCTGCTCAAACGTCCCGGA
CGCCTGCGACCGGCTGTCTGCCATGCTGCCCGGTGTACCGACATAACCGCCGGTGGCATAGCCGCGCATCAGCCGGTAAAGATTCCCCACGCCAATCCGG
CTGGTTGCCTCCTTCGTGAAGACAAACTCACCACGGTGAACAATCCCCGCTGGCTCATATTTGCCGCCGGTTCCCGTAAACCCTCCGGTTGCAAAATGGA
ATTTCGCCGCAGCGGCCTGAATGGCTGTACCGCCTGACGCGGATGCGCCGCCACCAACAGCCCCGCCCATGGCGCTGCCGATACTCCCGACAATCCCCAC
CATTGCCTGCTTAAGCAGAATTTCTGTCATCATGGACAGCACGGAACGGGTGAAGCTGCGCCAGTTCTGCTCACTGCCGGTCAGCATCGCCGCCATATTC
TGTGCAATACCATCAAAGGTCTGCGTGGCTGCACTTTTTACCTGCGACATACTGTCCGTGGCGCTCTCTTCCCACTCACTCCAGCCGGACTTCAGGCCTG
CCATCCAGTTCCCGCGAAGCTGGTCTTCAGCCGCCCAGGTCTTTTTCTGCTCTGACATGACGTTATTCAGCGCCAGCGGATTATCGCCATACTGTTCCTT
CAGGCGCTGTTCTGTGGCTTCCCGTTCTGCCTGCCGGTCAGTCAGCCCCCGGCTTTTCGCATCAATGGCGGCCCGTTTTGCCCGTTGCTGCTGTGCGAAT
TTATCCGCCTGCTGCGCCAGCGCATTCAGACGCTCCTGATACGTGACCTTATCGCCAAGTGCAGCCAGCTGGCGTTTGTACTCCAGCGTCTCATCTTTAT
GCGCCAGCAGGGATTTCTCCTGTGCGGACAGCTGGCGACGTTGTGCCGCCTCCTCCAGTACCGCGAACTGACTCTCCGCCTTCCACAAATCCCGGCGCTG
CTGGCTGATTTTCTCATTTGCTCCGGCATGCTTCTCCAGCGTCCGGAGTTCAGCCTGAAGCGTCAGCAGGGCAGCATGAGCACTGTCTTCCTGACGATCG
CCCGCAGACACCTTCACGCCGGACTGTTTCGGCTTTTTCAGCGTCGCTTCATAATCCTTTTTCGCCGCCGCCATCAGCGTGTTGTAATCCGCCTGCAGGA
TTTTCCCGTCTTTCAGTGCCTTGTTCAGTTCTTCCTGACGGGCGGTATATTTCTCCAGCGGCGTCTGCAGCCGTTCGTAAGCCTTCTGCGCCTCTTCGGT
ATATTTCAGCCGTGACGCTTCGGTATCGCTCTGCTGCTGCGCATTTTTGTCCTGTTGAGTCTGCTGCTCAGCCTTCTTTCGGGCGGCTTCAAGCGCAAGA
CGGGCCTTTTCACGATCATCCCAGTAACGCGCCCGCGCTTCATCGTTAACAAAATAATCATCCTTGCGCAGATTCCAGATGTCGTCTGCTTTCTTAAACG
CAGCCTCTGCCTTAATCAGCATCTCCTGCGCGGTATCAGGACGACCAATATCCAGCACCGCATCCCACATGGATTTGAATGCCCGTGCAGTCCTGTCTGC
CCAGGTCTCCAGCGTGCCCATGTTCTCTTTCAGGCGGCGGGTCTGCTCATCAAAGCCTTTCGTGGCGATATCGTTCGCCGCCTGTAAGGCCCCGGCCTCA
TCACCGGAACGCTGCAGCTGCGCAACATACGCAATCTGCTCTGCCGTCACGTTACGGAACTGGCGCGCCATCGCCATCAGTCCCGACGTCGGGTCAGTGG
TCAGCTTCCCGAAGGCTTCAGCGACTTTATCCACCTCCACACCGGATGCAGACGCAAAACGCGCGACACTCTGGTTGATGGCATCAAACTGTTCACCACC
ACGCACACCGGCATTCACCAGGGCTGCCAGTGACTCTCTCGCCTGGTTAAACGTCAGCCCTGCTGCCTGCCCGGCTCTTGAGAGAGTCAGCATACGATCG
GCAGTCAGTCCGGACTGATTACCGGAAAGAACCAGGGTTTTATTAAACGCTGAAAGCGTGGAATCCCCCTGGTACCAGGCGTACGCCAGCGCACCTGTCG
CCACCGCCAGCGAGGTGACCCCGACCATCGGCAGGGTGATCGCACCGGCAAGCCCCCTGAGCATGGGGATCATCCCGCCGAAGGAGTCCTTCACCTGACC
GCCCTGTTGCAGCAGGATCAGCCAGGGATTCTGACCACCGGCAAGCTGCGTGGCGATATCCGTAAACTGTGCGGGCAGGGTTCGCATGGCCGCTTTATAC
TGCCCGACGGAAATCCCGGCTTTTTGTGCAGCCAGCGCCTGGCGGCTCAGGCCCTGTTCAACAGCACTGGCGGTTTTTCTGGCGTCAGTATCCAGTCCTG
AAAAATGACGCCTTACCCGGCTCATCTGCTCATCGAAACGGACCGCATCCAGACTCAGGTCAATAATAAGATCACCAACCGGCTGGGACATATCTCACAC
CTCCTGGAATCCCCGCTGAAGCCATCATTAATGCGGCATCATCCACCATGACATCCGCCACATCCGCAGACGATAAAATATCGCCCCCTCCGTCCCCACC
GAACCGGACGCCTCCGGCAAGTCCTGCCGCTTTCTGCATCAGCATTTTGTCCTCATCCAGCCTCTCCACCTGCTCTTCCTCATGCCGGGGGACAAGCAGA
CTGAAATCAGAGGGATGCATATCCGGATCGCAAAAAAACAGGCTGAGTACAGCGTACATCAGCCCGGAAAAATGCATATCCAGTTGGGTATCCTGAAAAT
AATGCGTGCGGTAAAAATGTCGCCAGTCGGCATATTCGGTGGATGTCATCCCGGCAAGCATGGCGCGCCAGTCAGGCCTCCCCATCTCTCGCGCCAGTCT
GAGGGCAAAATTCAGCTCGCCGTCGAAGACTTTCCCGCAGAAAAATCATCATCAGTAAGCGCGTTATTTTTCGCCACTTCGGTGATATCCGTATCCACAT
GAACAGCCCCGCTCATCCCGGACAGACGCAACACCACGTCTTCCGCCCGGGCAATGGCATCAGCAGGCCAGGTGGTGAGCACCTCCTGTTCGATCTGCAT
CACAGCCTCATTCATTGATGGTGACTCCGTTTTCTGTGGATGGTTATGCCACAGGGACATCGCCACCAGAAACGCGCCGGTTCTGACAAGGTCTTCCACG
CTCACCTGCAGGTTACCGCTGGCTTCAGCCTGTTCTGCCCGTCGTTTCAGCAGGGCAAGATGCTCGATACGCTGCAGCGCAGACAGCTCGGAAAGCGTGA
CGGACACACCGTTATATTCAAATTGTTCGGTTTTCAGAAACATGTATTACCTCCGTTTACCCTGCAGCGCCCGCTTCAGTAACGGTGACTTCAGCTACCG
TGGCAAACTGACCATTACCGGAAATCACGGGGATACTCACTTTTCCAGCCTTAACCCCCGTCACAGTGATCGCCATATCTTTCACAGCAATGGTTCCCGT
TGACGGATCGGCGGAAACCGCTCTGAACGTTTTGTCGGTTGCACTTTCCGGCTCAAAAGAAACCGTCAGGGTTGTTGTTTTCCCTTTGCCACCGTACCAG
ATGTCGGCGTCACCTTAATCGCAGTGACCGGCGTAATTTCGCTGCGTTCTTCCGCCACAGAAGGTTTACCCACGTTGGTCACTTTCACCGTGCGGGTGAT
CACTTCCTTCGCCGTTACGGCCTTACCGATACTGCTGACCCAGCCACGGAACACATCCACCGTGCCGTTCGGGAAACGGATTTTATAGGCCCGCACATCC
CCGCTTTCAAACCAGCCTATAAGCCCTTTCTGACCTTCTTCTCCCGGTTTCCAGGCCAGCGTAAAACTGGTATCTCCTGCAGACTTCTGCCCCTGCCCGG
TCGCAGTCCAGTCCGCGTCTTCATCATCCAGGTAGTTATCATCGTAGGGTTCTGCCGTCATCTCGCCCGGCGTCAGATCCTTCACCTTAGCCAGTCGCTG
CCAGTCATCGTCTGACAACGGGTTTGCATAGGCGTCACCCTGACCGTTATAAACCCACAGGGTGGTACCGGCACCTTTTACCGGCTCAAGGGGATTTGGT
GTTGACATATCGTCCTCACATCTCGTATGTAATGGAATAAGTCAGATCCGCAGAACTCCATAACGCCATATCGTCATCACGACGATACTCATAGCCCTGC
GTAACCATCGTGGTAATCAGGTCTGCCAGTGCCGGGATCGCAGTCATCGCCGGATAAATCCGGCTTTCCATCCACGAATCCAGCTCCGAATCCGGTACCT
GTGCTGGTAAAAACACCTCAATATGCAGTGTGGCCCGCCAGGTATCTGCATCCAGCTCTTCACCGGTATACTCTGCATCCGTCAGATAAACCGCGACCGC
GGGAAAATCCTCTTCGTCAAAAACAACGGGGCGACCATCAAACAGCGTCGCCCCGTGTTCATGCAGCTCCAGTGCATCCAGCACTGCAGCACGGATATCA
GTATGTTTCATCGTTTTATCGCAATCCTCAGTTGTTGTTTCAGCGCGTATGCCAGTTCTCCGGGCAGACGTTCACGCCGGATACGGTCAACATTCTCATC
AAACGCCTGTTTCAGTGGGGCCGCCATCGGGATTTTCACCACATCAATGGGGTAACGGTTTTTCCCGACCACACGCTGCATGACATGCCAGCGACCATTT
TTTAATCGCTGAATAAATGCCCGCTGATAACGATGCTGACCGGCTTTGAGTATGCTGTCCGGACGACGCCCCGGCATCCTGATCCCCAGCTTAATCACCG
GGAGATCACCGCGGTTAACGATAATTCTGGCATTCGGATTTCTGACCGTGGCCCGTTTCAGTCTGGACCGTTCCTTTACCAGTTTCCGGCTCACCCTGGT
CTCCCGAGCAACCTGTGACGAAGACTGATTAATCGCCGTTGTGGCCACGCGGTTAATGGCCATTGCTGAAGCCGCCGGAATGGCGTTTTTACGAACCCGG
CTCAGATTTTCAATCGCCTGATCAAGCCCTTTTATCGCCATAATTCACCCTGCGTTTATCGTCGCCGGTTAACTGCCGGTGGTTGCCCACGGTTGAGCCA
GAGATAACAACTGCCCCCGTCATCCGGAGAAACACGATCCACCCAGAATGTCTCACCATTAATGGTCAGCGTGTCACCACGCCGCACAGCACGAACCGTA
TCCGTCCGTACAAATAATGACGGGCAGCTTCCTTCAATACGGACCCCGCTACCGGCAAACCCCAGCGACTCCGGATCGTCAAAAACCCCTGAACTTCGCT
GCCACACTGTGCCCCCGAGGTGAACTGCGCACTGATGCCCATCACTTCAACAATCGTACTGTCCACCCCGGCAAGGGCGGCATCAAAGGCATTCTGAAAA
TCACGCATAAACAGCCATTCCACCATCAACGTGTGTTTTTGCATCTGAGGACATAATCAGAATCACCCGACCAACATCCGCAAGCTCAACGGATTCCCCC
GTTTCACCATCAACGCCACAGAGATGGAGGCAGGTCAGAACTCTGATGCGCGTTAACGCGCCGGATGTTTCCTCACGAACATCATGAGCCGCGTTTTCCC
TCTCCCGGATATCCATATTCATAACCTGTACATCATCGCCGGATGACTGCATTTCCTCTTCCCATTCTGCCACCCGCTGCGCTATCTCTGCGGCACTCCC
GGATATATCCGGCTCACGCCCCAGAATCAGGGCCAGTTCATCAAGCCGTTTCAGATTTTGCTCTTTCGTTGCCATATCATCCCCCTGTGAAAAAGACACG
GGGGCATTTCGCCCCCGCTCACGGATTATTTCACCTGTACCACCACAAACTCATCCGGGTCCGGCAACACCATCAGCGGCGCGGACTGCGTCATGGTAAA
TTCACGGGCGGGATCCCCTACCGTCAGCCAGTGTTTCGGATAACGGGAAGAGGCCACCACACCTTCGGACAACGCCTGCGCATCCTGAATGGCACCATAG
CAACGAATGCCCTCTGCTGCCGTATTCCCCAGGACCAGCGAGCCCTCAGGCAGATAACGTTTTTCGGTACCGTCCTCTGCCACATAAGACGTTTTTGCCA
CCACAATGGCCAGATCGCCGTAATACCCTTTGAAGGACACCACCGCGCCCAGGTCTTTCACCGCTGTTTCGAGTTGCGAATTAGAGCCGCGACGGGTATC
CAGTTTTTCGCGGAACAATTTAAAGCCATTCAGCAGACGCCAGACGGTACCGTCCATAATGGCAATATTCACAAGACCGCTGGCCTGGTCGCAGTAGAGG
TCAAGATCATGTGTAGGATCGAACGTGTCACGATCCTGTTTTGACCACTCCTTACCACTACCCTGAGTGATGTTATTCTTCGTCGACCTGCCAAAATCGA
CCTCAATTTTCTCGAACTGGTCTCCTTCCATCGTGTATTTGCCATACAGCACGGCATTCACCGCCTGCATTTCTTCCACCTGGACAATGGCGTGCTCTTC
CTGTTTGAGGTTATCAGTGATGATACGCAGACGACGGTAGGCCGGGTCGTTCAGCTGAGCCGGATCTTCACCGGGAAGACGCTCAACCGCCTGCTGGTAA
TTAAATTCGTGTTTCGGCTTGACGTAGCCCGGACGTAACACGCGGGTTTCACCACCACGATGACGCAGCACTTTTCCTTCAACAACCGGGGAAACATAGG
CCGCCACCGGCGTTTTTCCGGTAATTTTGTCCAGCATCACCTCTTCGGTATGGAAATTCACCGTACGGCGGAAAAACAGCTCCAGAAACAGCGCACGAAA
TTTCACTTTTTGTTCGGTATAACCGAGTAACTGGCGGGTCGTAAACAATCCCATAAATCAGTTCCTTTCATTCAGAAATCAGTCAGGCCACCGCGGTGGC
CTGATAACGTGTTACGGCAGCGCCGCGTGACTCAGGGCACTGCCGGCAAAGGCGTTGGCCTTTTTGTGTTCATCCACACTTTCAGGCCAGCGGATTGCCT
CCGTCGCAAAGGTCCCCGACTTGTAATAGGTCAGCGCCGTCTCTGTGCCTTCAAGCGGCAGTACCAGTATGCCAACCGCACTACCGGCTTTTTGTCCGTC
CCAGACCACCAGTTTCCCGGTGGCCTCATCCAGCATCAGTGGCGTCAGTGCCGGTGTTGCCGAGGAAATCCCGCTGCTGCCTGTGGCGGTATGAGCCGGA
TCATTACCGGCAAAAATACGTACTTCCGCACGCTGTTCAGTGATAGTTTTCGTCACCATATTGTAAAAACCTCCTGTTGATGGTCAGCACTGGCTTCATG
GCATGGCCATGAGCATTTTCACGTCCGCATCACCGTCTGCTGACGTCTGTGGCACGCCACCCTGTACCGCTGCCGGTGAATGGTTCGCCATGATGCGTTC
AAACAGGGCGGTTGTGGATGCAGAGACCGGTTCTGCCTTACCTGATCCCGCAGCCAGCACAGCCCGGGCGCTCTCCACAGTCATTCCCGGGCAGGCAGCC
AGCTGTTCAGCCTGCGCCTCAGCCCCTTTTGCCTCATCCAGTGCCATGATCTGATCACGGAGTGAGGGTCCGGCATCCGCCTGCGGTGAAGCAGCCAGGA
TCGGGCGGGCTTTTTCCACCGTCATCTCCGGCATCGCCGCCAGCGTTGCCGCCAGTTGTTCACGACCGTTCGCTTCTTCACACGCCATAATGCGATCGGC
TTCACTCTGCGTGGATGCCACCGGCTGCTGCGGTGCCGCCGCGGCCAGAATCGCCCGGGCCTGTTCAACGCTCATGCCCTGTTGTCCTGCCAGCATCGTG
GCAAGCTGTTCACGTCCTTTCGCTTCCTGGCATGTCAGGATCCCCATCACTCGCTGGTTCTCCTGCGCGGCGGCTTCCGTTGCAGTTAATTGCGGCATAG
TGCCTCCTCTGACATTACTGTTCAGCGCCGTGGCCATCACACTGATGGCATCCGACGCATTGACTAATTCATCCGCCAGCCCGGCATCAATGCCGGACTG
ACCTTCAAAAACGGCGGCCTCTGTTCCCGTGACGGCATCAACAGACAGACCGGTAAACATGGCCACTTTTTCGGCAAACATCCGGCGCGCCGCATCAATG
CGCTGCTGCATGTCCTGGCGAACCTCTGCCGGTAAGGCTTCAAACTGATTGCCATCCACCTTGTGCGCCCCTGAGTAAATCAGCGTGATATCCACACCGG
CCTGCGCCAGATGACCGGCATAGCTGACATGGCTCATCATCACGCCAATGGAGCCGATACGGGATGTCTGGGTAACCAGCCGTCGGGAGCAGGCCGACGC
CAGCAGCATGGCTGCAGAACAGGCCGTGTCATTGCACAGTGCCCAGACCGGCTTCTGCTGACGGAGGCGGTAAATCATGTCAGCGCAGTCAAACGCGCCG
GCGGCCTGCCCGCCCGGACTGTCAATGTCCAGCAGTACGCCCCGCACCTGGCTATCTGCCATTGCCTGCTGAAGACAGGCGACAATGCCGTCATAGCCAG
TCATTCCGGAAAATGGCCGCATCCCCCCAGCCGGTGCACCAGCGTGCCGGTCACCGGCAGTACCGCAATACCGTTCACCACCCGGTAAACACGGGCCGGT
CGTTTACCTCCGGCCATGTACTCGTCCGTTTCAGCCAGCATTCCGGGAGCATCAAACTGTACCTGCTGTTGTGGTACCGAAAGACTTGATGCCCCCATCT
CGCGCCCGAGCGCGCAAAAGAAAACCCGCGCATAGGCGGGCTCCAGAAGCAGCGGTTCATTGAATGCTGCGGCAATAATGTGTGAAAGATTACGTCTCAC
GGGGTGTTGTCTCCTCTTCCGGCCTGCGACTCTCCGCTATCTGCTGCTCATACGCCTGCGCTATCCACACCGGACGTGAGAGTCCGGCTTTTTGTCGCTC
AGCAGATTCCCTGACCTGCTGGCGGAAAATGTCCTGATAATCCTCGCCCATCAGCGCCAGCTCTTTCTCATACGTGCTCAGTCCGGCCTCAATGCGCATC
ACTGATTCCTGGACTTCCTTGAGCCCGTCAATGGCCATTCTTCCGGCTCCAATCCACTCAGCCCGTGACCAGGCTGATCGCGCCTGATAAAAATCAAAAC
GCGCCCGTGGCGGACGAATAATCCCCCGAAGAAGTGCCTCTTCCAGCCAGCAGGAAAACATCTGCGTGGCCAGCCGGGACGCAATAAATTTTCGTCGTCC
CATAAAATAGCGCCACGACTCATTGGCGGAGGCGCGGGCACTTGAATAACTGACCTTCGAGTAATCCCGGGACAACTGTTCGTAGGAAACGCCAAGACCG
GCGGCGATATACCGCAGCAGCGCCTGTTCAAGCGCCGAAAATCCATTGTCTGAATCCTGTGCGGTCTGAAGTTTCAGATCATCACCGGGGAAAAGGTGCG
GAATTTTGACACCACCCAGCGTCACGCTATTCGTGTCATACCAGGTGGAGAACTTATCCAGAATATTAATAAGCGGATTATCCTTCTGCCCCTGCGGCGC
ACCGGCGATATATTCAAAGGCCTTTTCGGTATCAAGGTCACTTTCAATCGTCGCTGCATACATCGCCTTCACTATGGCCGACTGAAGCTGTGTTGCCTGC
AGGGAATCGAGCATCTTCAGCCGTTCCATTACGCTGTAAAACTGGTTGGCCCCACGGGTCTGCCCGTCCTCCACCGGCTCGAAAATATGCAGCATGGCCG
GACGCCCGGTGGGAAGTTCACGCGGGATCCGTTCCCATCGTCCACTCCCGGAGAACGGAAAATCATCCTCACAGATATGGTACGCAACGGCACGACCATA
TCGATCGACCTCCACACCGGCCCGCAGAAAACGGTTCCCCATACCGTGTCCTGGCGTGTCCACCCGTTTCGGACTCACGGCTTTAAAACGCGTACGAAAC
AGTTGCGTGCTCTCCGTATCCCAGACCGGCTGCACAAAGATTTCGCCGTTAAACGCATGAACGCCCACACCTTCACGGATAAATTCCGTAAACGTGCGTT
TCCCTTCCACGTCGATCTCGCCAGACATCCCTTCGGCGTATTCCGACCAGGCCGCCTCCACCTCATCGACAAAACTTTTTGCTGCAGTCTCCCGCATCCC
CAGCCAGCGCCAGTTCGGACGGTAGCTGATCAGAAACATATGCCCGACAATATGATCCTTATGCAGGGCCACCGCATTGGCCGCTATCCCGTTATTGCGC
ACCAGATCATCTGCACGGGCATTGCCCAGACGCAACGCGGGCAACAGGGCCGCATCGGCACTCTGCGCCGGTGGCAACCACTCCGCCATTTGCCCGCCAA
ATCCTGCACCGCCCCCGTTGTAGCTGAGGCTCTCCCGAAGCGGAACACCGTTCACATCAATCAGGACAGGCGTTCGTTTCATAACCTCACTCCCAGCGGA
CGACGGCGACGTCGGGTTGTCCCCAGTACCGACTCCGCATCATTGATCGCCCGGTTAAGCTCATCCAGAGAAGCCGCCGTATATTCAATTCTGCGACCAT
CTTTCTGGACAGACACCACCCGTTTACCGGTTAATAAATCAAGGCGCGCCTGACGCAGCGCCTGCAGTTCAGCGACTGTAACCATTCACTCCTCCGGACA
GCTTCGCTGCCAGTTCTTTCAGGGTTGGCCGGGTCGTCTCTTCTTCCCGGGATTTTGCCAGTACAGCCAGATCAAGCTGCCAGCGTTGCACGGACACACG
TAATGCCGCGTAGGCATACACCAGGCAGTCCAGCGCTTCGTTACGCCGCTTTTTGTTATCCCACAGCAGACGCATCTTTCCTTTTTCCCACTTCTCCACA
AGCTCTTCCGCGACCAGTTGCTGCGCCTCTGTCTGCGAAAAAATCTCCGGATCATCAGGAAAACGGATGGCATACGACGTGGCTTCATCCGCAGGAGTGG
GATCGGCTTTCATACGGGCATAGAGAATTTCTTTTGCGGTGTCCGTCCCCACTTCACACAGATACACGCCCCGCTGATTGCGGGTTTTCGGCATGGTGAT
CACCGGCTTGCCATAGACAGATGCGCCTTTTACCGGCAGCACCCGGAAAACACCGTGTTTTTTTGACCTCTGATAGACAATTTCACCATCGATCCCCCGG
TGTCCCAGCAGACACGGGAAATGGTCATTTCGGTTCCGTCTGCATGGCAGTATTTTTTGTTGATCGCCGCATCCACACGTAACAGCGTCTCTTCCTCATC
GGGACGGCCCATAATGATGATTTTATCCACCAGAAAAGCTTCCTCTCCCGGTGCCCATCCCCAGACATACATCTCAAAACGGTTTCGCTGCGAGTCAATG
CCCGCCGTCAGATAAACCACCCGGGCAGGTACCGCCGCCGTGTAATGCACGACCTTATCCATCAGTACCTGGTGATCGAGTTTTTCGCCCACGGCTTCTT
CCCAGGTCTCGCCCAGCGTGGTGTTCACAAAGGTTTTCAGGCCGTTGGGATCTTTCAGTGCATCCAGCCAGTCATAGACTATCTGTACCCAGGTGGTAAA
CGGACTGTACGCCGTCCAGATATGGAACGTGATGGAGCGCGGCGGCGGAATTTCATCACCCCGGGCGCTGAAAAACGTCAGACCGTCACGGGTCCACATG
CCCGTGTTTTCACAGATCCACCGCCCGTTGCTCTGGTCCAGTTCAGACTGATGGATCACGCAGCCATGATGTTCACAGAGGTAGAAAACACTTTCGGGGC
TGTCCTTCTCCCATTTAAGCCCAAAAGGCGTGGACTCATCGCCAAATTTCAGATACTGCGCCTCCCCACAGTGCGGGCAGGGCACATAAAAACGCATAAA
ATGCGCCGACTCGTTAGCGGCTTTTTCGATCTGGCAGGTTCCTTTGATTTTAGGCGTCGAGCCGCGAATGGATTTTGGCCACACCGACCCCTCAATACGC
TTATCCCCCAGCAGGGTTGGCGAGCCCTCTTTTTCGACATCCGGCTCGAACGAGGAAAGTTCGTCATAGCAGACCACGTCCACGGATTTTTCACGGTAGT
TTTTGGCGGCAGCGCCGCCCAGGCACCAGAAACCGACGCCCGATGAAAAGCGTTTCAGCGTGAGAGTATTGTCACGATGTTTACGCCCCAGCCATGGGGA
AAGGTCTTTCAGGCATGGCACGTTCCGAATCGTCGCCTCCACGTGAGACTTCATAAAATCTTCAGCGGCAGAATCCGTGGGCTGAAAAAGCAGACTGTTT
CGGGATTTATGCTCAATAAAATACCCGACCACCCCCAGCAACATCTTTGTATAGCCAACACGGGCAGATTTAATCAGATTAACAGTGCGGATCTGATCAT
TCCCCATGCTGTTCATGATGGCGATCTGGAATGGCAGCGTTTTCCATTCTCCCTCACCATATGAAGATTCTTTAGGCAGATAATAATTTTGATCAGCCCA
TTCAACTGGCGTCACCGGCAATGCCCTTATCAGGGGCTGTAATGCTGTTGTGACAGCACTCATCATATTATTCAGTTGTTGCTCTGATATATTCATCGAG
TAAATCCGGTAATTTATCCCCCGCCCGCGCACACTGATTTGCCCCCTTCGCAATAAGGGTTTTCAGATGGTCAAGATGGCGCGGTGTTAAATCAGGAAAC
TGTCGTTGCATGGATAAAGGGATGGAATCAAGCGTACTGGATAACGCCATTGCCAGCTTACTGAGGGCAAAAATACAGAACCCGGTGTCAATAAGTTTTC
CTTTTGACACCTCATTTTTTAACTGCTGTGTAACAGCCTGTTCTGCTGTCAGTTCCCATCTGGCAATAAGCAATTTTTCCTCATAGTCGTCTTCGCTATC
GCCATCAGGCACATCGTTTTTACTTCTCCTCAGATACGATATGTAAAAATCGCGCCAGGCATCCAGATCCAGTTGCCCTCGCTTATTTGATATCGGGGCA
CCCGGCAATTTCTGCAATCTGCGAAGCTGGCGATCGGTCAGACTTAAATGCCTGGCAACTTCAGTCTGCGTAGCCACTCCTCACCTCGCAAAAACTCTCA
CCTCACAATCACAACAAAACCGGTCATGTCCGGTTTACATATCTATTTTTTGTGCATGTCCGGTTCACAGAAGACCTGTTTTTATATTTTTCATATAGTT
AACTTGAAGAGAAACCGGACATGGTTCCCGGAAAATTTTCATAAATAGCGAAAACCCGCGAGGTCGCCGCCCCGTAACATGTCGGATCGCCGGAAAGGAC
CCGCAATATGATAATGATTATCATCTACATGTCACAACGTGCATCTACGCCATCAAACCACGTCAAATAATCAATTATGACGCAGGTATCGTATTAATTG
ATCTGCATCAACTTAACGTAAAAACAACTTCAGACAATACAAATCAGCGACACTGAATACGGGGCAACCTCATGTCAACGAAGAACAGAACCCGCAGAAC
AACAACCCGCAACATCCGCTTTCCTAACCAAATGATTGAACAAATTAACATCGCTCTTGAGCAAAAAGGGTCTGGGAATTTCTCAGCCTGGGTCATTGAA
GCCTGCCGTCGGAGACTAACGTCAGAAAAGAGAGCATATACATCAATCCAAAGTGATGATGGATGAACATCCCGGTTTCTTCCACCATCGCACCGGAAAA
GCGACTATGAGGGTAACCCTGCGTCTGTCAGCACAGTAAAACCCGGTGTGCATCGTTTTTGATTATTCCCGCACACTCACGCAGAAGGAATTCCCCGTCG
GGCTACGGTCATGGTTAATGCGGGAATACGGCGACGATACAGCGCATAATGTGTCAGGCTTGAATACCTTTATCGAATCCCGGTAATAAAAACTGTCCCT
GTCTCTCCAGACGTTCCAGCTTTGCAAGCAATTGAGGTTTTTTCGTTCTCCCCAGCGATTGAGCAGACGGCCTGACATGCTGGCGACATCCTTCTCTTTC
ATGTACTCCAGCATTACGGCGTTACGTTCTGCTTCATAACTTTCGCTGTACTTACGGAGTTCTGCTGACATCCAGTTAAACGCATTGATATAGGCTTCTT
TAACAGCATCGGCTTTTGCCCCGTTAAATCCCATAACCAGCATAACGAAGCCACTAAAGTCCATGCGGTAGTAAATCTGTTTCTTGTCAAAAATCCCTAA
GTCATTGATTTTCTCGACGGCCCAAAAATGGGTTGTCGAGAATTCCTCAGAACATCTCAAACATTTAATAGCCCTAATCACATGCTGATGGCGTTTACCA
AATGCCCTGGCAATCTGGAAGGTGTCAGTTACCGGTTGACCTTCTGCTGCGGTAACTAACTGGCGAAAGTCGAAGTCATGATTCGCAATTAATTCATTCA
TGGCGTTGCCTGCTTCTTTGAAATGAACCTTTGCCGCACAGGAAACCAGCCCACCGAGGCTCGCCAGCACTAACTGGTATCCTCAAAGGCCCATTCCAAA
GGGTCAGGTTCGGTGTTTATTGTGCGCTGCGGTGCGCGGTGAAATACCGGTACAAAAATGCCCCGCATCTGCGAGGCATTTTCCTGAAAGTCACTTGTTA
AATTTCAGTGAAATTAAAATTATTTTAAGCACTGCGTCCTGATGTATTCCTGCAGGTAGTTAACCTGCGCGGTTATCTTGTCGATTCCACCTCGGAGACG
GTAATAATTGAGTTCAGCATCTGCTGTAAGTCCTGGGCTTTCTCCATCGCCCATGCTGCTGGCTCCGGTCGTTGACTTTGCACAGGTGGCGGAGACTTGC
AGGCGCTTACGCCCAGCAGAAACATCAGCACGGAGACTTTCGATAGTCGCATTAGCATCAGCAAGCTCCTTTGTGTATCTGGCGTCAAGTTCTGCTACAT
CACGTTGCCGCTTCTGCATATCAGCGATGATGGATGTGGCTTTATCGCGCTGCTCTTTGTAGGCGATGGCGTTATCACGGTAATGATTAACAGCCCATGA
CAGGCAGGCGATAATGCAGATAACCAGAGCGGAGATAATAACGGTTACCCTGCTCATTGTTGCCCCCACAAACAGACTTCACGCTCAATCTCGCGGCGAG
TCATCAGCCCTTTCCATTGCTTACCGCCAGCGTATGTCCAGCGCCGTAGCTGATCACATGCGCCTTTGATATCGCCCTGGTTTATTTTGCGAAGAAGCGT
CGATGTTCTGAAATTGCCAGCGCCCACGTTGTAAACGAACGAGTAAAGAGCGCCGCGCGTTGTTTCCGGTATATCGACGTTGATGTACGGGTTAATTTGT
CTGGCGACCGTGGCAAGGTCTTTATTCAGGAGGGCTTTGCATTCTGCTTCGGTATACGTTTTACCGGGCATGATGTCTTTTCCGGTGTGTCCGTGACATA
CAGTCCATACGCCAACGATATCTTTGTATGGTATGTAGCTGACACCTTCCAGACCATCGTTACCACCTGGACCAGTGATGAGCACAGACGCTATGGCAAC
AGCCCCACCACCAATAGCAGCTGCAACAGCCTTGCGTAATGACGGCGACATTATTCACCTCTCGCAGCCTTACGCTTATCTTCTTTAATCTTGAAATAAA
GATTTGTCAGATACGTCAGCAGGCCAAACAGCAGACTTCCCAGCACACCTATTGCCACCCACTGGGACGGAGAGACTTTGTCCAGCAGCTGCAGTAACCA
GTATCCCGTCCCCACCGCTGACGTGGTGTATGACACACCTGTTGTGATTTTTTCCATCTGATGTATGTCTCCGTCACCGCCGACAGAAAATGAAAGTAAA
GAAAAACAAAAAAGCCGCCAGTGTCACCCACTGACGGCCAACGCCGGGAGCCGTGATTATGGCATTCAGGCTCTGCTAAAAATGCCAGATAACATTCCGG
CCTCCCTGATTCAGGTTATAAATGACACAATATCTTGACAACATCCGTCACTGTCTGTCAGAAAATGTACTGCCATATAGAAGCAACATGTGAAGTACAT
CTATCCTTTTGAGCCAGCACCTCTCCACCGAAAGTCAGTGCTGGCTGTTTTTTTCCTTAATAAGGCATCTGTAACTGAAACAATCCGCATATTGATAATA
TATTGACAGGCATCATTGCTGTCTGTGAAAAATAAGTCTCTACAAACATATAAGGCCTTTTAGCCAGCGTCTTCTTTTTCAGGTCAGTCGCTGGCTTTTT
TATTATGCTGCCGGTGCATTTATCTCCAGCATCAGACTTTCTATCTCAACGCCATACGCTGCATTTTTTGTAACATCCGTCAGCGTCAGCGCATTCAGTC
CCAGTGTCAGACTGTCTTTTATAACCTGGAATGCCGGGCCAGCCACTCCATTCAGTTTCGGAGTAACCGTGGCACTGCCGGCGGTGAACACCAGCTCCAG
CGTCTGCCAGTCGTTACCGTAATCGCCGAACTCCCCCAGCTTCGTGTTTCCGGCTTTCCTGTGATGCATCAGATTCACTCTGCCGTCAGTGGTCTGAGTG
AAGTACGACATCAGGAACGGATTACCGGTACCCGTCATCGCCACACCATCAGGAACGGGAGCATCCGTATACAGATAAATCCCCAGCCCGAACTGATTGT
TGGTCAGTGCGCCTGACAGGCGGAACTTACAGGTCAGTCTGCCGCCCTGTGTCAGCAGGGTAATTGCGTCATCCACCGGATGCGTCAGGGACCAGGTTTT
ATTGCTCTGCTTGGTGATCTTAAATACACCATCTGACAACTGAATTCCGCCATCCTTAATGCTCCAGCCCTGCGCAGCAGCCTCTCCGGCTGCCGGCAGC
AGGGAGATTGTGCGAACGGACGTATCTGCAAACGGACCCGATGGCGTGTTGCCGCCGGACGAGGGTTTGATTTCCGGTGCCTTACCACTGATGAAGGCTG
AGGTGCGCCCGGCTGCGTTCAGAATAGCGGTTGCCAGACGATCCGGAATAATGCTCCTGCGCGCCCATGAACTGAAATGTGTCGGGCGGTTTGATGATAC
CTGGTTTCCATTCGTTCTCGATGCCGCACCGTAATATCCTGATACCGGAATATCCGGATCTTCTGCCGGCGCGTTAGTGGCGGTATTGACGCCGTTACCG
TCTGTCATGAAGGGCACAAAATAAACGCCCTCACTCTCCCTGTTTTTATACCCGCCGTACACGGTGTCGTACTGGGTAGCGTATGTATTTTTCCAGTAAT
ACGTCGTGTCACCACAAACCCACGGCACATCTGCAGCACTGCCACCATGGCACTGCGCGTTAAACACGGAGAGGTCAGCACGAAACTGTGTCAGCATGGC
TGTAAACAGCGCAGGTTGCTGTACGTGGGTGGCGGCGCTCATGTCAAACTCACCCTGCATCCAGCAGACGGCCAGCAGAACGTTTTTGGGATTTTTCTGC
AATGCCGCTTTTGTGCGGGAAATCAGATCCTGATATAACGGCTTGCCCACCCCCAGCGTGCCGAATCCTGACTGGCCCCCGTGGACTCGCTGAATGTCCC
CTCCGCGCCCTGGGTAAATGCCGAACCACCACGACAGCATGGTACCAGCAGGATCCCCGCGTTATTCGGGATATACGGGAGCAGTTTTTTGGCAATATGT
AAACCCTGGCCGACACAGCCGTACTGCCCTTTGCTCAGGTCAGCCCTCGGATGATTCAGCGTACTCATATCCTGCACATCATGCAGACAGTGGTCAGCCG
GAATAATATCGTTATATCTGCAGGCAGCCCCGCCCGGCGTCACTGTACTGCGGCGCGCCAGCTGTTTAATGCGCGGATCCGGAGCATCGTATGAATCCGG
CAGCGGAAGCCCTTCACCGTAAGCCATGGCATTGGATTGCCCGGCCAGTACGATGACGTAGTACCAATCCGGCTCAGATGAAGGGCCGACCTGTGGCTCT
CCTTCAATAGCCACCGCCTGCATCAGTGTGTACGGCGTAATGGCAACCGGTCCGCCGTATGGCTGCCAGCCCTCTTTCAGTTTGTGTGTCAGCTTTTCCG
CAAGGTCTGACGGCGACGCCGCCCTGACAACATCGTAATGTTTAATCGACATCGAATTTCTCCCGTGTAGAGGAACAGAGTTAAAAAGCCGGAAGCGGAA
TCAAATCACAGGATGACCATCTGCCAGTGGCAGGTCATAAAAAAGGCTGCGCAATGCGCAGCCAGAACTCACAAGGAAAATGATAAAAGGAATAACACTA
GTGATGTACGCATGGCGCCTCCCGCTAAGTTCTGCAATGATCAAACAGAACTCGCTACGTGCCCTTAAAACTCGATCATTTAGCCCCTCCAAGGAGGATT
CACCATGCGGTTGATTTTTTAATAAACAGTAAACAAAAAAGTCAAGAATTATTCATTCTGTTCTTTCATCATCGGCCACAGCAATACCACAATGCCGCAG
ACCAGAGCGCCATCAGTCAGTACCAACATTATCCTGCTGGTGAAATCCATCATCACCATCACTAAAAGCAGGATCACAACAGCAAGCAGACACAGTTTAT
AAAACAATGTTCAGAAAACGCATTCAGCATGCCTAAGGTTCTATTCCTACGAATAGCCAACTTGCAACTTAAAATATTATTTATGCAGCCAATTAAATTC
TGGTCCTTACAATATCAACCTGAAGATTCTTATCTTGTGCTGATTGATAAATGACAAACCTTTTACTACCTGCATTGAAAGAAGTAGACAAAACCAGACA
ATTATCATAACGAGCAAGAACATAATACCAACCATCATTATAATTAATCATTTCATATTCTTTCTTAAACTGTGGTTTGTAATATCCTGTCAGAAATGAA
AAAAGCCAAAAATATGCCACAAAAGCAATCATCACAATCTCAAAAAATGTTTTTTTATAAATGGCTTATCATAGAAGCATGATACCGATAAAAATCGCCC
ATAAGATCTTATCGAAATTGTAACCGCCAGCGCAATCGCTGCTGACAGTAGCAAAAGAGGTACCTGAATCTTCTGTCTCAATATAGAAAACTCAATAATT
GCCGGCACAAACAATAATTCCACAGCAAAATAAAGGCGAAATACATTTAGCTCTTGCATAGAATGTTTTCTTTTCACTGCGAAAAAGAATACAACACCAA
TACCCCAACCGATAAGAAATATAGCAATGACGATAACTGCAAAAAATAAACTTCTGGCAACATCATCAACACCTGCACCTACAATCCACCATGGGAAGCC
GTAGTAAAAAGAAGTACCCCATCCATAGAAATAAGCACTCCCCCATCCAAGGCATCCCATGTAGGCAATAAAAGTGAAGAACTCCTGAGCAGCGCACCAT
CCTTCATAACCACCCCAATACAAGATGATAACATTGGCTTACAACTCATAACAAAAGCAATTCAATGCCGTCAAGAGGTTACAGGCTAAAAAACTCTATT
ACATAGCAGCCAGCATGTTTACCGTACAAGTACAACTCAGGGCATAAAAACCACTCGGCAGCGGGTTTATACATTTTTTACAACATACCAAATTTGCATG
AAGTATATGGCTTTTAATCCAGTTTTGCAATATTTTGCTGTAAAAATGCTGCCTTTTGTTTTGAACGTGTTCTCGTCACAAGCAATAAAGCATCACTATC
AAGCTGTAGAAAAATGTGCTTCATTGCAACCCAGCGTTCAGTAAATGTCTCGGACCAGTTTTTTGTTGTCACTCCCACCAATGATGCCAGTGTCTGGTAT
TCATAGGCCTCACGCCCTGCAAGTTCGCTCTTCACATCCTGTGCAGCCAGCCAGATTAACGTCTTCAGGCGATCCAGTGTCTTACCTGCAATTTTTCTGT
TACTTAACAAATCTTTAAACTCGCTCCATGCCCATTGCGTTATGGTGGCCTGATGCCCCCATCGAACGCTTTCGCTGTAACACCAAAGCAACCATGCTTT
CTGATGTTCATCGAGAGACAAAACCGCGCGGCGCCATGAAGAGGTTGAGAATTCAACCGGGCTGACCAAAGCAATGGATGAACCTTTTGCGTACGACTGC
TTACCGGAAGTCGGCGTATTATCCAGCGTAATCATCTTGCCAGTTACCACATCCAGAATGCGCGGCTTCTTTCGTTTGTATGTACCAGTATCAAATTGTG
CATGCTCCTGCCAGGCTTCGAGCTGGCCTTTCGTTGCTCCGTTCAAGTCAGCAGTAGCTGCCATAAGTTGCTCACGAACATACTGTAAATATTGGGTATT
CATGCAGTAAATCCTTTCTATATTTTGGCATAATTCTTCAACATTCGGTAATCGTTCAAAACCGAATCGGGGAAACGACATAAGCACAGGAGCCCCCAGC
GACAGCGAAGGAGTTCTGATATATAAGACTCAGACATCATTCATTCCCCGGTTCTCCAATATCTGTTTCACTCATCATCCATAACTACCTGTAATTGCCC
CCTTTTTTTGTAACAGTTCTTATATTGCTATATAGAATAGCCATTACTAATGCTTTTAAATTTAATAAAATAAAAATTATAAAAAACATAAAACACCACG
CAAACACACTTAATAAAAACACCGCTACATTAAAAGATAATAAAAACCGCAATAAAAAACGAATAAATCAATTGTCTCACGCAATTATAAAACATCATAT
TGATTACGCACCTTGTATTACAAACTCATGTATGTAAAATACGCGCACCATTCAAAAAAAGGAAGACAATAACATATGAAAAAAAGTGTCATCGCTGGCG
TCTTTATTGCTCTGTCATTTACCACGTGTTCAGCTATCGCGAACAGCCTTGCATTATCATTAGCAAATGATGATGCAGGGAAGTTTCAACCAATACTTAA
TGATATTTATGGCAATAAACATGAAAACAGAGATGATTACTCACAAGGCTTATTTCTGGGATATAGCCACGATATCTCAGACTCGAGCCAATTATCTCTC
CATATTGCGCAAGATATTTACTCTCCATCAGGCAGTAATAAAAGACACAACACAGCTGTAACTGGAGACAGAGCTTTTAGTGCATACACTCACACTGGTA
TTGAATGGAACTCCCTTGCGAATGACTGGATTCGCTATCGATTAGGTACTGACATAGGTGTTGTTGGCCCCGACGCAGGCGGTCAGAAAGTACAAAATAA
AGCTCATGAGATTATTGGGGCAGAAAAATATCATGCATGGGATGATCAAATAGAGAATCGCTACGGTTATACTGTAAAAGGGATGCTATCCATGACACCA
AGTATGGATATTTTAGGTGCTAATGTTGGATTATACCCTGAAGTTTCTGCTGTTACTGGAAACTTATTTCAATATGTAGCATATGGCGCAACCATTGCCA
TTGGTAATGATAAAACCTTCAATTCGGATAATGGCTTTGGTCTGCTGGCTCCCCGTGGTTTAATGCATATGTCCGATACAAGCGGATTCAAATACAAGAT
TTTTGCAGGTATGGAAAGACGAGATGTCAATCGCAACTATACTCTCGAAGGAAAAACAATACAGACGAAACAAACAACAGTATCGCTAAACAAAACTGTT
GATGAATATCAAGTTGGCGCAACAATTGGGTATGCACCTGTAGCCTTCACACTAGCATTTAATAAAGTAACATCAGAATTCAAGACAGGGGATGACTATT
CATTTATAAATGGAGCAATCACCTTCTTTTTTAACTGAATTGAATTCAATCAAAATAACATAAGTCCAACAAAAACATAAAGTGCGAAATGAATGCCAGC
TCCATTTATTTCGCACTATAAAAGATTAAAAGTTGCAATAAAATAATAAAATGACTCAGTTACGAAAACCAATAAACTGTGGCCAGTAGTGAGTCGCTCA
TCATCGGGCTTTTTGGCGAATGAAATTTAGCTACGCTTTCGAGTCTCATCGTCTTCCCCTCTTGCCCTGTTTGACCATCAGGACGCCGTTAACTATTACA
TGACGCTCGCCTTTGCTGTCTCGGTTGTACTTGAGCACTGTTCCTCTTGCGCAGGAAAGCATCCTCGCCACTTCGGTCTGATTGCCTCGTGTCTGGATAA
GAAGCTCTGGTATCGTTTGAATTGTGGCGTTCATGCGTTCTCCAGTTCGGTGATTTTTATTCCAAGCCGTCCGCCTGGTACTTTCACACCACGAATTACG
CGAATGTCATCGAATTGCTCGTCGTCTTCCGCAAATCCGGCGTGGATAAGGGAGTCGAGTAAACCTTTCAGGATGTTGTCGAGGTCGCGGCGGCGGGAGT
CTGGAACGTCTGCGATGACTTTGATGCGGAGTCGTGATTTGGTGAAAATGTCTAACTAAAGTTGGCGGATGATTTGCTGAACGTCTTTTCGGTATTTCTG
GCCTTTATCGCTGATGTAGTATTGGCTTCCCCGTCTTCGCCAGTAGGTGTTCACCGACGGCGGGTATGGAAGCACAAACTGATATTCGTTCATGACTTAA
TCTTCCCCTCCTTCAGCAGTATCGCCTGCGTCCTGATCACGCCTTCGAGGTGGTAAAGTCTGGCGTCTTTGTTGTCGAGAATCCTTGTGCGTCGGTCGAT
CTCCGCGTGGCAGTCACTACAAGCCCATGCGCCGATCAGGTCGTCAGGTTTCATTCCCGTTCCGCAAATTCCAGCCATCCGGTAATGTGCCAGAACTGTA
GTTTCAGGATTTCCATTGCATACGCCGTAAATACGTACCTGGCATTCTCTTCCGCGCGCTTCTTTGCGTAGGTTAGCCATGACTTCTCCCCCATTTCTCT
TGGCATCTCCTCAACCACACTCGCATATTTTGGCTGGTAATATCGGTATGCTCTCCGCTGTATTCATTTTGTGAGTGCTTGCATCTCACATAAACAAATA
CGGCAAGCAATGGATATGCGAATAACAAAATAAATAACAGAGCTGTAGCAACAGATACTTTCACAAAAAATGCAGGCAACTCTCTGACCTGATAGTCTGG
AAAATCCAAGAATTCATCGATTATGTTGTTAGCAACATTGGTAGTTGCAATACATGCGACTGACAGACAATCAAAATAATTAAAGTCATATCCAGCCGCA
GCAGCCCATGTTGGATTGTCTTGAAAATGTTTAAACGTTATTTTTCCGTATCGGCTAATCACCATCGTCTTCTTCCTCGTACATTGAGCTATTCGGATCG
CTCATCAGTTCTGCGCAGTTATGGTCTGCCATGGTTTTCATGAAAACCCAGTTCTTTTTCTGCCCTCTTCCTTTCTGCAATAGCGTCAATGATGCTAGCA
AATATTCCAAGATATTTGGTGCGCCCATCTACGCATATATTCGCAATCCACTTGCATCTCTCTTTATTGAAATACACTCCAGTCACTCCTGACGAATTGG
TTATTTTTCTCTTTTGGTTCTGTGCATTCTGTTGGTGTGTAACCAATCGAAGATTAGATAGCCTATTATCTGACCTTACTCCATTTATATGATCAATTTT
ATACCCTAATGGAATCTCACCATTATTTATCATCCATATAACGTGGTGAGCATAAGTAATTACACCATCGATAGTTAACATCCTATAACCATCACTCCTA
ATGTAACCAGCAACACTGCCAACCTTAACATTATTAGAAGGAGACACTTTCCATCTAAGTACACCTAAAACATCATCATATGATAATTTATTTCTTAATT
CGTCTATGTTGCTTATATTTCTCATTATGTTCCACCATATTTAAGCATTCATATATACAACGCTCACACACGTGAACTTCCAGCACATGCAGCTTCTGAC
CGCAGTTAGCGCACGTTAAAGCTCGCTCGACACTTCCTTGTTCGTAACTTCGATTTTGGTCAATCACCTTGTTTTCCTCGCACGTTCTCTAAGCCACCGG
ATATCCCACAGATGAGCCGTGTAGTTGAAGGTTTTTACGTCAGATTCTTTTGGGATTGGCTTGCGTTTATTTCTGGAGCGCTTCGTTGGAAGGTATTTGC
AGTTTTCGCAGATGATGTCGGTGATACTTCGTCGCTGTCGTCTCATGCCGCCCTGTCTCCCCATCGCGCTTTCCATTCGAGAGCTAGTCGCGCTTCGTCT
GACCACTTAACGCCACGCTCTGTACCGAATGCCTGTATAAGCTCTAATAGCTCCGCAAATTCGCTTACACGCATCCTGCTGGTTGACTGGCCTATTACCA
CAAAGCCATTCCCGGCAAGGTTAGGAACAACGTCCTGCTGCTTTAATGCTGCGGTAAACACACACTTCCAGCTTTCTGCATCCAGCCAGCGACCATGCCA
TTCAATCTGACGCGAAACGTCACCAAGGCAAGCCCAAAGCTTTCGATTCTGGTCTAAGCTGCGGTTGCGTTCCTGAATGGTTACTACGATTGGTTTGGTT
GGGTCTGGAAGGATTTGCTGTACTGCGTGAATAGCGTTCTGCTGATGTGCTGGAGATCGAATTTCAAAGGTTAGTTTTTTCATGACTTCCCTCTCCCCCA
AATAAAAAGGCCTGCGATTACCAGCAGGCCTGTTATTAGCTCAGTGATGTAGATGGTCATTTAATACTCCGTCACGTTTTCCTGTCGCCACGACTCGTCA
TATTCCGATTTCGGCATATTGGCGATGTAGATATATGGCGATCCCGATTCAAGTTGCAGGAACTGGTGCGATTGCTCGTCAAGGAACAACGGGACACCAC
CTTCCCAACCTTCGCCGTTACGTTGTTTTTCAAGCATCAAAACAGATGCCGGAGATGCCAGTAGCTGTTCGTCCTTCTCTGACATCTTTTCACCACTCTG
AACTCTCTGTAACGCTCTCTCGCGAGCCTTGTTACGCCAGATGATGAAAAGGTTGTCTGTCAGGTCTGTTATCGCTCCAGAGCCTTTTACGTCCATTTTC
CCGGTTGGTTTTTCTTCGCTGTCTCCTTTTCGCGAGTGAGTAACGAGAATGACGTGGGAGTTTGTTTTGTTTTTGAAGTCGCAAATCGAGTCAACAAACG
CCTTCTGCCCGTTATAGTCATCGTCGCCTATGCCACATTTCATCAGGCTGTCGATGATGAATAACTGGATGCCGTATCGGCGGCGAGCGTAGTCGAATAT
TTCGATCAGCCTGTCGGCTTTCGCCGTTCCGGTCAGGCCAAACACCCAAAGTCTTTCGTCATAAAATTTAAATGCAGAGTCAATTTCCAGCACTGGCGGC
ATCTTGCAGCACGTCGCCTGACGGGTAAGTCGCTTAAGGAGAATGCCTGGCTTCAGCTCAAGTGACGCGATGCACGTCTTCACACCCTGACGCATTGCCT
CAAGTGCCATATGCCCGACAACCTCCGTTTTTCCGTGACCGTTCACACCATTGACCAGCGTCAACTCGGCCTCACGGAACTGGAATTTATCTGCCAGAGA
TTCCCACGGTGGATTAAACAGATACTGCTGCTTGCCGTAGAAAGCGTTGATAGTGTCCTGGTAAAACTCTCGCGCGCTGTAGAGTTCTTCGGGATCGAAG
TAGGATGCCGTGCCGATGTACTGCCAGATTTCATCCTCGGTAACACCGTTCATCAGGCATTCGTTGATGTCTTTGTACGGCAGAGTAACAAGACGGCAAC
GATGTTCACCGAGTCGGCTTGCGATTTCCCTTGCGGCTTCACGACCAACATCATCAACGTCCATCGAGATGAATATTTCCTCAAACCTGTCGAGGTTGTG
ATACTCAAACTCAATCCACTGCTGCTTAGCGCCTTTCCCGCCACCAAACGGCACGGATAACGCCGAGATGCCGTATTGCGCATAGCTCATACAATCAATT
TCGCCTTCGCAAAGTACAACCGCCCTCACGCCAGCGTCCAGAGCCTGCCATCCGAACAGACAAGGTTCGCAATCACCTTCTGCCATAATGACTTTCTTCC
CGTCCGGTCGCTCAGTGCTGATTCGCTTGACCTGCAACAACTCACCATCGCGTTTGTACGGAAGCACCAGTGCATCAAGTTCTCGTTCTCCATTCCACAC
CTTGCCGCTGACAACCTCGTAGCGCTTTACGACTTCTGGCGATATGCCACGCGATTGCAGGTACTCAAGATGGGATTCTGTTCTGGTAACGTAGCGGGCG
ATTTTCTTGCGATCAGGTCTGGAGAATTTCTTCTCACGTTTGGCATCGAAATGGTGATCGTCATCCTTGATACCGAGAAATGCTTTCGCTTCCTGCATAG
CCTGATGCAGGTTAATTCCTCGACATGCCATCCACAAATCAAGCATGTCACCGCCGTCTCCCTCAGCGAAATCAGCCCATTTTTTCTTGCCGCTAAGGTT
GACCTTAAGGCTGTTTCCCTTGTCACCGTTGACGTTACCGGCAACCCACTCATGCCCCTCTTTCTTGCCGTTTGGCAACAGGTGCGGAGCCACCCTGTCA
ACCTGCGCCCAAAGCAGGTCGCTAAGTTCACTTGGCGTCATGATTCCCTCAGATTGAGATTTTTAAACCAGAAATCGACAAACGAAATACTTAACCAGCC
GTGGTTATAACCAGCGACCAGTAGCGATTTGATTTTTGATTTCATGGTTCACCTGTCGAAAAACACGTAGCCAGTTTTCGATACGGTGATTGCGGATGAT
GGTTTGGATTGTGGTTGAATGGTTTCTGGCTTTTCGTCGTTCCAGCGCTGACCGTTCAGGTAGCTCGATGGTAACAACCTGTCGAATCCGAACTGCTTAC
CATTCCTGCATGCGATGTCTTCTGCCAGCATCGTGGCAAACTCGCTTGCCGTACCCTGGTAGTTTTACGCCATTCCCTGAACTGTGTTCTGAATGCCGAA
GCTGCGTTTTTCTTCCCGGCTTTCCGCATGCCTGCACACCAGAATATTTCCTCGAATGCCTTGTCGGTTTCTTCGTGACGGTCAGGAGTTTTTTCACACT
CTGTTCGGACATGTTCGAACATAATGTTTTTAGGTTCATTGACTGGTTCAAAAGAGTGATAGGTTCTGGGGGCAGCTCCTGCCCCACCCCTAGGTCAGCT
CCTGCCCCACCCCGGGCAGCTCCTGCCCCACCTGATTCTGGTTGTATTTGTTGTGCATTATCCAGCGTCAGATAAAAAACGTTTGACTGGTTAAGCTCTC
CTTTTCTTCTGAATTCCCTTTTCAAAAGCCCCATCTCTTCCAGCGCCCTAATGTGACTTTTTACTGTCGATCTGCTCACCTCACACTGGTCAGCGACATG
TTGATATGAAGGCCAGCATTCGCCATTATCATTGGCGTTATCGGCAAGTTTAATCAGAACCAGTTTTCTCAGTGGGTTGCCAACCTTTATATTCATGGCC
TTAGCCATAAGATTCATGCTCATTTTGACTTCTCCGAAGTTTTGTACCTGTTAAGTATTTCTCTCAGTGGCACAGCTATTGCTGGATTAACCCCCTGATA
AAACTGGTCACGTAGCACATCTTTTCGGTGATTAACGCGTTTATTTTCCTGCGTTTTTCGCATATAATTACCTCGTTGGATGTTATTAAAATTCCATTTG
TATTTGATCAGAACGCTCGGTCTTGCACACCGGGCGTTTTTTATTGGTGAGTCCATCAAGCGCATACTTAAAAGCCCTGCTAATCGGACTTATGTCTGAT
GCCATTCCGAAAGCACACAAGACCGAAGCAATAAACCTCCAGTCCGTTCTGCTTATCTTCGATTCATGACAGCCAATCATCTTTGCCAAACCGCGCTGGG
TAATCGCTGACAGGTTGATAAGTAAATCTGTTTCTGCGCGATCAACGTCGCGCTGTGATAGTTTGCTGTAATTTGTTTGTTCCATTTCTTACTATTTCCA
TAGGTAAATAATCACTAATACTCATCTTTCGATGAGTTCTTAATTAGTTACCGCGTTGTCGGCGGTGCAGATTGATAAAGAGCGGTGTTACTTATGCTGC
CAGAAGGTTCTTTTTGCTTATTTCAAGCATTTCGCTTGCTTGATATTTGCCACCAGAAATCTCTTCGATTTTTGATGCGTATTTCGTTTTCCCAAAAACT
CAGTCTTAGGGAGGAAGCCGTTTTTGAGCCACTTATAGACAGCCCTTTCGCTAACTCCACAAGCCTTCGCAACTTCAGGGATGCCGACACCTTTAATCGG
CTCATCAAGATTTTGCATAGGAATGTCCTTTTTCGTACTTTCAGTACGCATTATGATTGAACTGAAAGTTTTTGCAAGTGCTTTAGTATCGTACTCATGG
TTCAGAATGAAAAAGTGCGCAAAGAATTCGCCCAGCGGCTAGCGCAAGCCTGTAAAGAAGCTGGTCTTGATGAACATGGTAGGGGAATGGCCATAGCCCG
TGCCCTTTCTCTTTCGTCCAAAGGCGTTAGCAAATGGTTTAATGCTGAGTCTTTACCACGCCAGGAAAAAATGAATGCGCTTGCGAAATTTCTAAACGTT
GATGTTGTTTGGCTTCAGCACGGCACTTCGTTAAATGGAGCGAATGATGAAGATACTTTTTCAATTGTTGGCAAATTAAAAAAAGGGTTAGTGCGCGTGG
TTGGTGAGGCAATTCTTGGTGTTGATGGTGCCATCGAGATGACCGAAGAGCGCGATGGGTGGCTCAAGATTTATAGCGATGATCCAGATGCCTTTGGTCT
TCGTGTAAAAGGAGACAGCATGTGGCCCAGAATAAAATCAGGAGAATATGTACTCATTGAGCCTAACACCAAAGTATTCCCAGGTGATGAGGTGTTTGTC
AGAACCATTGAAGGGCACAACATGATCAAGGTTCTTGGCTATGACAGAGACGGAGAATACCAATTTACAAGCATCAACCAAGACCACAGGCCAATAACGT
TGCCTTATCATCAAGTAGCAAAGGTGGAGTATGTAGCTGGTATTCTGAAGCAATCTCGCCACCTAGATGACATCGAGGCCAGGGAATGGCTGAAAAGTTC
ATGACTTCATCATCACATAGCTAGTAACCAGTACGTTTGGATGGTGGTGAGTAACACACTGCAAGCAAACAGAAACATGGATATTAAAATATTAGCTTAA
CACAGCAAATCGAAAGAAACAGCGAGGGCTCGGATGTCCCAAGAATTATCTTTAACCTTTACCGAAAACATATATTATTCAACTAAATAACCTGTAAGCA
TCAAAGATGTGATTACCTCCCTTCAAGGGTGGGAGGCCATCGCAAAACAATCAGAAGGTGTTTTGCAGGAACTGACAGGGGCTAATATCCTTGATATATC
GGTGCATGTTGCGCGATTAGAAGCAGGAAGCCTTTATGAAGATATTGTTATTAAACTCCTCTTTGGTAGCCAAGAAGAAATGGACAAGTTTCTTGCTGGC
GCTCATGCAAAGATCGGAAATGGGAAAATGAGAAACGCTCTCGTTGGTGCTGTTGTTATTGGTCTGGTTGGATATGGCTTAGTTCTAGCAACTAAGGCTA
TGGCTCCAAGCAACACCTCCCACTTTGAAGCAAATAACAATACAATCATCAATATTGGTGCCGGTGAGGCTAATATTTCACCTGACCGTCTTCAAGCAAT
CATAGAAAGCACGGTAACCAATAAGAAGACTCTTGCCAAAAGTTCCATTAAGACGCTTGCCCCAGCTAGGGCAGACGAAGGATCTACGATGGTCATAGGT
ACAGGGGTGGTACAGTGACCATTCCCGCTGAAACCATTAAAAAAGCCCCAACTGAAGTTGTCTTCACACCAGAGTCATATACTCAGGATCATTTTGATGT
TGATGTTGAAATCCGTGCATTAGACCTCGACAATCCAGAGAAAGGTTGGGCCGCTGTTATCCCTGGATTAATAGATCGAAGAGTAAATATGGTTCTTGGC
CCCAACGTAAACCCATCAGATTTTGCAGGTAAATTTGCTGTACGTGCTGATATAACAATAACGTACCAGCTCAAATCATCAGATAAAAAATACCAACCGA
AAGAAGTCTTTATAAAAGAAATAATCAAATAATTATACCCGGCCTCAGCGCCGGGTTTTCTTTTCCTCATGATCGTCTACCTTATTTAACATCCGCACAT
GTGCTAACCCACGAACTAACACGCCAGCAAACAATTCTTTCTCTCCTACTGACCAATCTTCAATCTTTACAAAAATAAATTCCTTTACATATCAAAAACA
TATCTCATTAAGTTAATGAATCACAAACAATTCGTACTTATAGTTCTTGATAACATCGAACTGTTAGTTCATTATTATCACCATCAGCAGGACGCTGGCA
GCCAAACGGAACAGATTGGCAGGCTCTTTAACTTCGATGGTGCGCTGACAAAGCGCGAACAGATACCAAACGAGATGGGTTTGGGGTGATGTGAATTGCA
GCAGTAACGACAGCAACCAGAAGATCAGCATCTGGCGCATCACCACCAAAGCCATTTCACATGAGGAAAACATCATGACGGTAATCGTGTACGGAAAATC
AACATTTGCAGGAAATGCCAAAACTCGCCGTCATGAGCGGCGCAGAAAGCTGGCCATCGAGCGTGATTCCATCTGCAACATCATCGATTCGATCTTCGGC
ACAGACAGTGAGGAACCTGTTCAGGAAGACCCGAGAAAGCGGTTAAGCCTTTCTGAAAAAGCAATATCACTCGGAAGCCTTCGCTGCAAGAAGGCAGATG
AATGCAGTGGAAGTATTTGCCTGCCAAACGTAGCTCTTTACGCGGCAGGCTACCGGAAATCAAAACAACTGACAGCGAGGTAAGTGATGAATCAGACATA
CATTCCATCATGCTTGAGAAATCTGCCAAAGCAGAAAGCAAAGCCCCGCAAGCAAGCCATAAAGGACGCTAAGGCAGAGGTTATTGATCAAGCAATACAA
TTGCTCAGGGAGGAGTTAAGAAGTGGCAAGCTCGAAGGAATGATGATGCCCTATCAGCGCGGATATCTATCGGCGATTAGTAAGTTGGAAGTATTGAAGA
GTGAATTATGAACTATCTGGAATTTCCGGATGGTTCATTGTTTTGGCAGCAAACCACTTATTTGAGGTGATATATGGAAGCATTAGTAGTAGAGCGAAGC
GAGGATGGCTACTGGACGCACCCAGAATACGCCAACCTGTTTGGGGATAGAGAGGTAATTTCAGCTGATGAGTTCAGATCTTTCTGCAAGCAGCATGGCA
TTGAATCATCAATTGTTGAAATGGAAAACGACAACAATCAAACGGTAATTGACGCGTATTTTGAAGATGGGAATCCAAACATCAGTGGATGGGAGCCAAG
CATGCCAGATGGAGAAGGATGGTTTGTCGGTTCGATTCACGATACAGAAGACGGTCCGATCTGCGTTTGGTTCAGAAATGTAGATAAGGCCGCATAGTCG
GCCTTTATTTTTGGCATAAACAACAGAATAAACACAGCACTGTGTATTCATTCCAACGAGTGAATACACGGAGCAATGTCGCTCGTAACTAAACAGGAGC
CGACTTGTTCTGATTATTGGAAATCTTCTTTGCCCTCTAATGTGAGGGCGATTTTTTTCTGTGAGGATATGAACAGATGTCAAACATCAAAAAATACATC
ATTGATTACGACTGGAAAGCATCAATAGAAATTGAAATCGACCATGACTTAATGACAGAGGAAAAACTTCACCAGATTAATAATTTCTGGTCAGACTCTG
AATACCGACTCAATAAACACGGCTCTGTATTAAATGCTGTATTAATCATGCTGGCGCAACATGCTCTGCTTATAGCAATTTCAAGCGACTTAAATGCATA
TGGTGTTGTGTGTGAGTTCGACTGGAATGATGGAAATGGTCAGGAAGGATGGCCTCCAATGGATGGTAGCGAAGGAATAAGAATTACCGATATCGATACA
TCAGGAATATTTGATTCAGATGATATGACTATCAAGGCCGCCTGAGTGCGGCTTTACCGCATACCAATAACGCTTCACTCGAGGCGTTTTCGTTATGCAA
TCAAACAGAAGGAGCATCCTATGCAACAGTTCGCTATTGCAGGGGCGGCATCGGTTCGCCCTTTCAACCCGATTTTATCGGTACAGCATTCACGAAAAAA
TATTTTAACCGGAGCAGACTTTAAACAACCAAGAATGAAAAGCTTGCTCGAAAAGCTTTGGGATATTTTGAAACAACAAGGCCGTCCATGAGTTTTACAG
ATAACTGGTCAGACGAAGAATTCATTCGTCAGATGAAAGAATTAATCGGTAACGAAGGAGATATTCATGTCACTTGCAACCACAGTGAAGGAGAGCAAGT
TACAGAGACGCATGTACACGCAGAAAGCTCTCTGGTATCGCCATAATGGTGACCGCGAAGGAATGCGGGTATGCCTTAATTTGTCCCGAGTCGAAGTATT
AAATCAGCGTTATTTCCTTGGGCCGTGTCCATTCTGAGGTGAATTATGGATTTGAACAAATTCGATGAGCCATTCAGCCCTGAAGATATAGAATGGAGAA
TACAGCAAAGCGGTAAAACACGCGATGGCAAGGTGTGGGCTATGGTGCTGGCTTATGTCACGAACAGGGCAATCATGAAACGCCTTGACGATGTTTGCGG
CAAAGCAGGATGGCGCAATGAATACCGAGATATTCCCAACAACGGAGGCGTTGAATGCGGCATATCAATCAGGATTGATTCCGAATGGGTAACCAAATGG
GATGCTGCTGAAAACACGCAGGTAGAAGCCGTAAAAGGTGGTCGTTCCGGTGCAATGAAGCGCGCTGCCGTTCAGTGGGGAATCGGTCGGTATCTGTATA
ACCTTGAGGAAGGTTTCGCACAAACATCTCTCGATAAAAAGCAGGGATGGCACAGGGCAAAACTCAAGGATGGAACAGGATTTTACTGGCTCCCTCCATC
GCTGCCGGGATGGGCAATCCCAGCATCAGATAACAAACCATCACCAGAAAATACCAACCAGACATCTCCATCGGTTGACTGCGAACAAATCCTGAAAGAC
TTCAGCGATTATGCATCAACAGAAACTGACAAGAAAAAACTCATCGAGCGTTATCAGCGTGACTGGCAATTAATGGCTGGCAACGAGGAGGCACAGGCTA
AATGCGTTCAGGTAATGAACATCAGAGTTAACGAACTAAAACAGGCGGCATAAATGTCTCACTTGGACGGAATTATTAAAAGATTCGAGTCCAGCTACAA
AGTTAATGAAACAACAGGTTGCTGGGAGTCTACCTATTCAAAAACAAAGGAGGATACACAAAATTTGTAGCCTTTGGCGTAACAATGCTTTCTCATCGGG
TTGCTTTTGAGCTTTATCACTCCCCCATTCCATCTGGGAAGATGGTTTGCCACAAATGCGATAACCAATGCTGCGTTAATCCTGAACATCTCTTTTTAGG
TAGCGCGCAAGAAAACATGGACGACAAGATAGCAAAAGGAAGGCATCGTGGAGCCAAGAAAGGTCATGCTCATCATGGTGCAAAATTAACAGAGTGGCAG
GTTATAGAAATTAGGAAAAGACTCTCTGAAAAAGAGAGTCAGTACAAGATAGCAAAAGACATGGGTGTATCTCAATCAATTATAAGCAACATAAAAACTG
GCAAGAGGTGGAGCAAATGAGTTCTCGCGGGATAAATAAGGTGATTATCCTTGGTCGGGTAGGACAAGACCCGGAAGTTCGATACTCACCATCAGGAACA
GCGTTCGCTAACCTGACAATAGCCACGTCAGAACAATGGCGAGATAAAAATACTGGCGAGCAAAAGGAATTGACTGAATGGCATCGTGTTGCTGTATCCG
GGAAACTGGCTGAGGTCGTGGGGCAGTATGTGAAAAAAGGTGATCAGATTTATTTCGAGGGAATGCTGAGAACCAGAAAGTGGAAAGACCAGTCAGGGCA
AGACCGTTACACAACCGAGGTTCATGTCGGAATTAATGGCGTGATGCAAATGCTTGGCGGCATTGGCGACAGCAAACAACAAGCAGCCAGCAGGCAATCA
CAGAAGCCACAGCAGCAATCATCACCAGCACAACACAACGAACCTCCGATGGATTTTGACGACGATATACCCTTTGCACCAGTAACTCTCCCCTTCCCTC
GTCACGCTATTCACGCAATTTAATCAGGAGAAAATCATGCCAGCGCCTCTGTATGGTGCGGATGACCCGCGCCGCTGTTCCGGCAATTCCGTATCGGAGG
TGCTGGATAAATTCAGAAAAAACTACGATCGAATAATGTCTCTACCGCAGGAAACGAAAGAGGAAAAGGAATTTCGCCACTGTATATGGCTTGCAGAGAA
AGAAGAACGCGAGCGAATTTACCAGACATCAATCCGACCATTCCGCAAAGCCACATATACCCACTTCCCTGAATATATCGACCCGCGCCTGCGTAATTAC
CGCTCACGCTATGGCGCTATCAGTAATGACTGAGGAATTTACCATGAGAGGACTTGCATACAATCCCGGCATTCTTCCGGCAGAAATGATTATTCGCCAA
CGCGTAAAGCCAATGCCATCGAGAGAGGAATTGCTTAAGAGAAATTCTTCTCCGTCAGTGAATCAAAACAAATATCTGAATGCGATGTGGCGCAAAGGAG
GCAACCAGTGAGTGAGTCAAAATGCCAAATTAATGGCAACAAGATAGAACCGTGCGCGGCGTTGGCAAAATCTCTCGAATATGGAAATCCAACATTCAAG
AGTAAAGGCATATTTATCCCGGAGCGTGTGAACATAAACACCGGCGAGTCATGCATAGATATTGCTCAAATTCACTCGGGGAAATATATCGGTCGTGGCG
TTGCAATGTGCTTTTGCCCGTTCTGTGGTGAAAGTTTGAAAACGTGGGAAGCGGAGGCAGCCAGTGAGCAAAATTGACCATCAGGCACTGCGTGAGGCGG
CAGAGCAGGCAATGCATGACGACTGGGGATTTGACGCGGACCTTTTCCATGAGCTGGTAACACCATCGATTGTGCTGGAACTGCTGGATGAACAGGAAAG
AAACCAGCAATACATCAAACGCCGCGACCAGGAGAACGAGGAGATTGCGCTTACGGTTGGGAAGCTGCGTGTTGAGCTTGAAGCAGCAGAGAACAACCTT
ATTGATAGTGAATGCCATGTTGCTGAACTGGAAGAAGCTCTACGCGATAAGCAGGCGTTACTTGAAGCCTCAGAAAAGCGCAACGCAAAATTACAAAGCG
AGAATGCATACATCCGCAACCGGTACAAAGAACTGGACCTATTAATCGGGAAAAACATTCTGGTCATGCAGGCTGCCATTATCGAATGGCAGGCAACTGG
CGACGCTAAGAGCGGACTAGCATGGATTTATAACACACTGTTTGGCCCTGGCGAATTACCGGACGAATCTGAGAAAGATGCTCAGGCCTACTTTAATCGC
AAATATGCACCGATTGACGAAAAGCTTATGGCGCTTCACAAGTGGTTTTGGGAACAAAGTGAAGCCGAGCGCGCCGCTGGCATTCGCATCAAAGGAGAGT
GAGATGAACGGACAAATCTCAATTGTTCGACCGGGAGCATGTGACGATTGCGAGATACGAATGATTATTCGTCTGGCGAGGGGAAAACAATAACTGCTCT
CATTACTCCAGAAAATCTCGCATTAGCATTAACCGGAAAGTCAGACCTGCCAGTAGAGCTAAAGCTGCGAAATGTTGAGATTAAGGTGAAATAGCTATGA
CCACTATTACCAAAGAGCGACTGCTGACAATCAAGCAGTGGCGCGAAACATACGGACCGGGTAGCAACGTTGTACTGCCAGCAGAAGAAGCGGAAGAACT
GGCACGAATTGCTCTGGCATCGCTGGAAGTCGAGCCGATAGGTTTCCGTTGCAGGCGCAATGATAACCTTGGTGATTGGAGTTACGTATATCATCGAGAG
CCAGATGATTTTGAGCGCAAACATTTAGTGATAGAGGGCATTTACGCCGCCCCTCCAGCGCAAGTAGTACCGGAAGAAAAACCAATGCCTAATCCTCTTA
GCATGTACGCGGTTGATGCTGTTGCCGCTATTGCAGAGGTGAGAGGCTGGAACGCCTGCCGTGCCGCTATGCTTCAGGGGAAAGGAGACTGATATGGATA
AAAACACCACTGCTTACTGGAATCTGTCACTTGATACCGAATGCCCAAAATGCGGTCACAATTTCGATCTGCTTTGTGACGCTGATTTCTGGGAGTTTTC
TGGAGCTAAACAGGCATGTGAAGAAATAAAAGGTTACGAAACATGCTGTCCAGAATGTAACCATGAATTTAAAACAGATTTCGTGTATTGAGGCATAACA
AATGACCACTATTACCAGAGAACAGGCACAGAAAATTATTGAAGCAGCCGATGAGGTTATTAGTGCGCTTGCCGGAACTAACGAGGATGTTCACCCTGGT
AGCGATAACATGCTACGCCTGTGGGATGACCTGAATGACCGTTACGCGCCCCTGAAGTTGTGCGTGAGCTGGCACGAATTGCACTGGCATCACTGGAAGC
AGAGCCTGTAAGCCAAACTTACAACTTGCCAGAATTAATCGAAGGGATGGAAGTTTCCATTGATGTAAGCACTTGTGATGCTGATTTAGGTAATCGCTAT
TTCGGTACCGTCACCGAGGCGTTAGAACTTGATACAGCCAAGAATGGTTACATCCTCCTAGTTCAGGACGCAGAGCCAAACTTCGATGTAAATGGCAACT
CTCCGGTAATTCCGGGCGGTTGGATAAGCTGTAGTGAGCGAATGCCGGATAGCAAAACAGCCGTTCTTGTTGCCAGGGAGTTTGACAGGAAAGGTGACTG
GCGAATGAAATGGGCGACTTACATCCCGGGGCATCCTGACGCTAATGATGGGTGGGTAATACCTGGTGCGTCGTGGATACCATCACACTGGATGCCGCTA
CCAGAACCGCCGCAGGAGGTTAACCATGGCTAACCTGCAACTTGCCGTCAAAGGTGAATACTTCGATGCCATGATTCGCGGGGAGAAAACGGAAGAGTAT
CGCCTGTGTAATGACTACTGGAATAAGCGAATTATGTTCCGGGAGTATGACCGACTGATTATCACAAAGGGATATCCGAAGCGCGACGATTCCAGTCGCA
GAATAGACGTCCCGTATGAAGGGTATGAAATCAAGACAATCATACATCCACACTTCGGTGATAAACCGGTAAAGGTGTTCGCGATAAAGGTGAATACCGG
CAATGAATAACAATCCTCGCATTTGCGGGGATTTCTTTTATCTGAACTTGCTACAGCGAGTTTTGTTTTATGGAGATGATAAATGCACTTCCGAGTTACA
GGTGAATGGAATGGAGAACCATTCAACAGAGTTATCGAAGCAGAGAACATCAACGACTGCTATAACCACTGGATGATATGGGCGCAGATAGCGCATGCAG
ACGTAACCAATATTCGAATTGAAGAACTGAAAGAACACCAAGCCGCCTGATGGCGGTTTTTTCTTGCGTGTAATTGCGGAGACTTTGCGATGTACTTGAC
ACTTCAGGAGTGGAACGCACGCCAGCGACGCCCAAGAAGCCTTGAAACAGTTCGTCGATGGGTGCGCGAATGCAGGATATTCCCTCCTCCTGTTAAGGAT
GGAAGAGAGTATCTGTTCCACGAATCAGCGGTAAAGGTTGACTTAAATCGACCAGTAACAGGTAGCCTTTTGAAGAGGATCAGAAATGGGAAGAAGGCGA
AGTCATGAGCGCCGGGATTTACCCCTAATCTTTATATAAGAAACAATGGATATTACTGCTACAGGGACCCAAGGACGGGTAAAGAGTTTGGATTAGGCCG
AGACAGGAGGATAGCAATCACTGAAGCAATACAGGCCAACATTGAGTTATTTTCAGGACACAAACACAAGCCTCTGACAGCGAGAATCAACAGTGATAAT
TCTGTTACGTTACATTCATGGCTTGATCGCTACGAAAAAATCCTCGCCAGCAGAGGAATCAAGCAGAAGACTCTCATAAATTACATGAGCAAAATTAAAG
CAATAAGGAGGGGCTGCCTGATGCTCCACTTGAAGACATCACCACAAAAGAAATTGCGGCAATGCTCAGTGGATACATAGACGAGGGCAAGGCGGCGTCA
GCCAAGTTAATCAGATCAACACTGAGCGATGCATTCCGAGAGGCAATAGCTGAAGGCCATATAACAACAAACCCGGTCGCTGCCACTCGCGCAGCAAAAT
CAGAGGTAAGGAGATCAAGACTTACGGCTGACGAATACCTGAAAATTTATCAAGCAGCAGAATCATCACCATGTTGGCTAAGACTTGCAATGGAGCTGGC
TGTTGTTACCGGGCAGCGAGTTGGTGATTTATGCGAAATGAAGTGGTCTGATATCGTAGATGGATATCTTTATGTCGAGCAAAGCAAAACAGGCGTAAAA
ATTGCCATCCCTACAACATTGCATGTTGATGCTCTCGGGATATCAATGAAGGAAACACTTGATAAATGCAAAGAGATTCTTGGCGGAGAAACCATAATTG
CATCTACTCATCAGAACCGCTTTCATCCGGCACAGTATCAAGGTATTTTATGCGCGCACGAAAAGCATCAGGTCTTTCCTTCGAAGGGGATCCGCCGACC
TTTCACGAGTTGCGCAGTTTGTCTGCAAGACTCTATGAGAAGCAGATAAGCGATAAGTTTGCTCAACATCTTCTCGGGCATAAGTCGGACACCATGGCAT
CACAGTATCGTGATGACAGAGGCAGGAGTGGGACAAAATTGAAATCAAATAATGATTTTATTTTGACTGATAGTGACCTGTTCGTTGCAACAAATTGATA
AGCAATGCTTTTTTATAATGCCAACTTAGTATAAAAAAGCAGGCTTCAACGGATTCATTTTTCTATTTCATAGCCCGGAGCAACCTGTGAACACATTTTC
AGTTTCCCGTCTGGCGCTGGCATTGGCTTTTGGCGTGACGCTGACCGCCTGTAGCTCAACACCGCCCGATCAACGTCCTTCTGATCAAACCGCGCCTGGT
ACCTCTTCGCGCCCGATTCTGTCGGCAAAAGAAGCGCAGAATTTCGATGCTCAACACTATTTTGCATCCCTGACACCAGGTGCGGCAGCGTGGAATCCTT
CCCCGATTACCCTGCCTGCGCAACCTGACTTTGTTGTCGGCCCGGCGGGTACTCAAGGTGTAACGCATACCACGATTCAGGCGGCGGTAGATGCGGCAAT
TATCAAGCGTACCAACAAGCGCCAGTATATTGCCGTGATGCCTGGTGAGTATCAGGGAACGGTGTATGTCCCTGCCGCTCCGGGTGGAATTACTCTGTAC
GGTACAGGTGAAAAACCGATTGATGTGAAGATTGGGCTTTCCCTTGATGGTGGCATGAGCCCTGCCGACTGGCGTCACGACGTCAACCCGCGCGGCAAAT
ATATGCCAGGTAAACCGGCGTGGTATATGTACGATAGCTGCCAGAGTAAACGCAGCGACAGTATCGGTGTTCTCTGCTCTGCGGTCTTCTGGTCACAAAA
CAATGGCCTGCAACTGCAAAACCTGACCATCGAAAACACGCTGGGCGATAGCGTAGATGCGGGTAACCATCCGGCGGTGGCACTGCGTACTGATGGCGAC
AAAGTGCAGATCAATAACGTCAACATTCTCGGTCGTCAGAACACCTTCTTTGTCACCAACAGCGGTGTGCAAAACCGTCTGGAAACGAATCGTCAGCCGC
GTACGCTGGTGACCAACAGTTACATCGAAGGAGATGTGGATATCGTTTCTGGTCGCGGCGCAGTGGTGTTCGATAACACCGAATTCCGCGTGGTGAACTC
CCGTACCCAGCAAGAAGCGTATGTGTTTGCACCGGCTACGCTGTCCAACATTTACTACGGTTTCCTCGCCGTAAACAGCCGTTTCAATGCTTCCGGTGAT
GGTGTGGCGCAACTGGGCCGCTCGCTGGATGTTGATGCCAATACCAACGGTCAGGTGGTGATCCGTGATAGCGCCATCAACGAAGGTTTTAACACGGCGA
AACCGTGGGCCGATGCGGTGATTTCCAATCGTCCATTCGCGGGTAACACCGGCAGCGTTGATGATAACGACGAAGTACAGCGCAATCTGAATGACACTAA
CTACAACCGCATGTGGGAATACAATAACCGCGGCGTGGGTAGCAAAGTGGTTGCAGAGGCGAAGAAGTAGGAGCTGTTAACTATGTGCCGGATGCGGCGT
AAACGCCTTATCCGGCCTACAGTTCGATACGATTTGTCGGTCGGATAAGATGCGTCGACATCGCATCCGACAATAACTGCGGATGCGACCTACATTCACA
TGGCGCTTTTTACATCTGACGGTTTTTATTGAAGTTAATCAAACTACCCGCCTTGATAATCTCGCGTTCTTCGGCAGTCAGACTTTCCATATACAGCGTG
ATTTCCGTTACCGGTGCATTTTCATGGATCACATAACCTTTAAACGTCGTTCCAGGATTATCCAGCGCCGCTTTAATGCCAGGGATGTAAATGTAATCCC
CCACTTCAAAGGTTGGCGCTTCCGCCATCTGCAGCGGTAACATCCCCCAGTTGATGACGTTAGAACGATAGCGTTTAGTCGCGTACTCCTCGGCAATATT
CGCCAGACCGCCAATCACACGCTGACAACTCGCCGCCTGTTCACGCGCAGAACCATCGCCTGGTTTCACCGCATAAACCATGCTGCCAATTTCAGTTTGC
AGCGGATCAACATGTTCCTGACCAGCAATCTGCTTAATGCGCGCAAACACCTCTGTCAGCTCGCTGACATTTCCCGCCAGACGCTGATTTTCCAGCTCGG
CAGTCGCTTTACTTCTGCCAACATAACCTGGATCGCGGCGTGACAGGGTAAACTCCGCCAGACCAATCGGATTTGAACGATAAGAAGAGGTTTCACCGGA
AGGAATCAGTTCGTCGGTGGTGGTCACTTCGTCGAGAATCTTCGAGCACACTTTGAGGACGATATTGTCAGTCAGCGCGCCCAATTCCGGCCAGTCTTTG
ATGTTCGGTCCGTAGATCAGCGGTTGCTGGGTCGCCCCTTTCACAAAGCCTTGATAGACGCGATTTTTATACGGCGTTACATCGAAGGCGTACTCCGGCA
CGTTGTCCCAGCAATCGAGTTCGCTGGCAGAGGTTAAATAGCCACCGTTTGCCGCAGTCGCAGCGATAGAACGAGCGTCCATCAACGCCACCGCTGACAT
CTGCCCATTAGCTGGCTTAGAGCCTTCGCGGTTCGGGAAGTTACGCGTGGTGTGGCGAATACTCAAACCGTTGTTGATTGGCGTATCGCCCGCACCAAAG
CATGGGCCGCAGAACGCGGTTCTGATGATTGCGCCTGCGCCAATCAAATCTGCGACCACACCTTTTTTGGCGAGATCCATAAACACCGGCTGTGATGACG
GGTAAACCGCCAACGAGAAGGTATCGTTGCCGCAGGATTGACCGCGCAGCGCATTCGCCGCCGCGATGACGTTTTCGTAGTTACCGCCAGAACAGCCCGC
GATAATCCCCTGCTGCACTTTCAGGCGACCATTTTCCACTTTATCCAGCAGCGAGAGTTTGGCTTTACCGTGCGCCACGCGTTCGGACTCAATTTCAATC
TCACGCAGAATGTCGGTCAGGTTCTGGTTCAGCGTGTCGATTTCATACACGTTGCTCGGGTGGAATGGCAGCGCAATCATTGGTTTGATGGCGCTTAAAT
CAACGCTGATGCAGCCATCGTAGTACGCCATTGGTTGAGGGTTAAGTTGGCAGTAATCCTGGCCGCGACCGTGCAGCGCCAGCCAGTTATGGACTTCTTC
ATCGGTTTGCCAGACAGAACTTAAACAGGTCGTTTCAGTGGTCATCACGTCAACGCTGTTACGGAAATCGGTAGAGAGCGCTGCAACACCGGGACCTACG
AACTCCATCACTTTGTTTTTGACGTAACCGTTTTTGAACACAGCACCGATGATAGCCAGCGCCACATCCTGCGGCCCCACATACGGCGCAGGTTTTCCGG
TCAGATGCACCGCAACCACGCCCGGATAGTCGATATCCCAGGTGTCATTAAGCAGCTGTTTTACCAACTCGCCGCCGCCCTCGCCAACCGCCATTGTCCC
TAACGCACCGTAACGGGTATGGCTGTCTGACCCGAGGATCATTTTGCCGCCGCCCGCCATCATTTCACGCATATATTGATGGATGACCGCAATATGCGGT
GGCACAAAAATACCGCCATAACGCTGGGCCGCCGATAAACCAAAAACATGGTCATCACCGTTAATGGTGCCGCCCACAGCACAGAGTGAGTTATGGCAGT
TGGTCAGCACATACGGCAGCGGGAAACGTTCCATACCGGACGCTTTAGCGGTCTGTACAATACCAACAAAGGTAATATCGTGAGAGGCTAATGAATCAAA
CTTAATTTTAAGTTTATCCATATTTCCGGACGTATTATGAGAAGAGAGAATAGACCAGGCAATAGTGCCTTTTTTGCTTCTTCTTTTTTATTTCGCCGGT
GAAATGTTCTTCGGCAATTATTTCGTTATTGCTGGCGAGAAACACGCCTTTTTCAGATAACTTGATCATCAAATACTCCAGATATCTGCGCACCGTGAAG
TGCGCAGAAAGCTAATAAATGGATATACTCTAAATAATTCGAGTTGCAGGAAGGCGACAAGCGAGTGAATCCCCAGGAGCTTACATAAGTAAGTGACTGG
GGTGAGCGAACGCAGACGCAGCACATGCAACTTGAAGTATGACGAGTATATTTACAGCATGTTCCAGCCGATCAGCATATTCCACCACCACACGCCGAGG
GTGATATGCACCAGGAAGGTTAATATCGTCAGTACCGCACCGACCAACCACCAGGATTACCCACGCCAAAGATGACCGGACCTGCCGCGCCGCCATAGTG
AGTAACCATGCCGCCATAGGAGTTAGAGAACAACAGTGCCAGCGCGGTTAACATTAACGGTGCGCCGGAGACGTTCGCCAGCATGGCAAATACCGGTAAC
ATGGCAACGATATAGGCACTACCAGAAGCGAAGAAATAACGCACGATGATGCTGAGGAAAATAATAACGAAGAAAGCAACGTTACCGTGACCATCAAATG
CCAGGTTATTTTTAAAGACTTCAGCTAACCATTCGAAGAATTTAACTTTCGATAATAAGGAGCTTAAGCCGATAATACCGCCGTACCAGATTAAGGTATT
CCAGCCGCCTTTATTTTTAACCACGTCTTCCCAGGTAACGATGCCCAGCAGCAGCATAGTTGCCATAACAACGATTGCCACGGTGGATTCATCAACCCCC
AGAGACTTACTGAAAATCCAGCCCAGCAGCGCCAGTACAAAGACACCGAGCAGCATTTTTTCGCGGATTTTCATCGGTCCCAGTTCGGCAAGGCCCGCTT
TAGCGATGGTTTTGTTATCCACCTTCTTAATTTCTGGTGGATACATGGTGTAAATCACCAGCGGGGTGACCAGCAGCATAATGATGCCCGGCAATCCGGC
GGCTAACGCCCATCCACCCCAGCTAATTTGCAGGTGCAGAATGTCGTTGATCATTTTCAGCGCCAGAATGTTCCCCGCCATTGCGGTAAAGAACATATAG
CTGGTGGTTTTGGTGACCATGTAAATGGACATCATCAGGTAATGTCCAACACGACGCGGACTTTTTCCGGTTCTGATCCCAAAGCCACTGCCACGCTGTT
GATGATCGGTAACACGATGCCGCCCGCACGCGCGGTGTTAGACGGTGTTGCCGGAGCCAGTACCAGATCGAGAAATACCGTAACGTAACCCAGACCCAGG
GTAGTGCTACCAATTTTACCAATCAGCAGATAGGCAATACGTTTACCTAAGCCTGTGGTTACAAACGCGGCGCTTAAAGTAAACGCAGAAAACACCAGCC
AGGTGGTACCGGAAGAGTAACCGCTTAATACGGCGGTGGTTTTAAATTCCCCACCTGATAAGTTACCCACCACGACCATCGATGCGGCGACGGCAATTAA
CAGTACGACAGGTTCCGGGAAAGGCTTGATAACCAGCCCCACAATGGCCGCCAGGTAAATACCAAAAAGCACCCACGCCAGTTCGCTTAATCCTGCCGGA
GCTGGCATAAAGCCAATAATACATGGGATCGCTAATATCAGAATTAGCTTCCATAACGATTTTTTATTCATTTAATATCCTGTTCTTTCTGTATGACTCA
TACAGAATTCCTTTATTGAGTATCATTATCACGACAACAAAATTTTTCAGGGAAGATAAACTTCACCGGAAAATATTTTTCTGGTCGTCCGAATAACAGA
TGCGCGTAACGTCGTGGCATCCTGACCTTCATTACTTAAATGAACGTCGAGCGCACCACTGGGGTGTTCAATATTGATATTGCCGTATCCTACAGAAGGG
ACGATTTGTCGGGTGACGGTGCCTTCCAATGCACAACTACTGGAAATAGCAATAGCACCGGTTATCGCCAAAGCGCGATGGCAAGAATGCGGCATAAAAT
AACGCACATTAATTGCCCCGCCTTTCTGCGCTGGAGAAATAAGTACAGGTTTAGGGATAACCATATTACTGACATCGCCTAAGCCCATTGCTTTACCCGC
TTGTAGACGGATAGATTCAATGCGGGCTAATAATGCTTTGTCGGCATCCAGCTCTGCCGGTAATTCATAGCCTGTTTTTCCCAGATATTCAGCAGGAATA
ATGACAACTGGCATCGCCATATCGATACAGGTCACCGGGACATCGTCAAAATAATCAATCTGATTATCCGTCGGGAAGACTTTTCCGGTTTTCGTTCCGG
CGGCATTCAGGAAAGTGAGCGCAACCGGTGCGGCAGTACCCGGTACGCCGTCAATTCTGGCGCTACCCTCGTACTCGACAACACCATTTGGCGTTTGCAC
ATCAGCTTCGATGAACGTACCCGTATTGACGTTGCGGATACGTACGCGGGTAACTGGCGAAGTCGCTGCAATCAAACCATTTTCAATGGCGAATGCCCCA
ACGCCAGACAGCATATTGCCGCAGTTAGGCGTGGTATCGACACGTTGCTCATGGACGATAACTTGAGCAAACAGATAATCGACATCTGCACGCGGATCGC
TGGAGCGGCTAATAATGGCGACTTTACTGGTCAGCGGATTACCGCCGCCAATACCGTCAATTTCCAGATCGTTACCGGAACCCATAATTGCCATCAATAT
TTTATCGCGCTGCGTTTGATCTTCGGGTAGATGTTCCGCTAACAGGAACGCGCCCCTCGAGGTTCCACCTCGCATCATCACGCAGGGTATTTTTTTCATA
ATAATGCCCTCAATTTAAAAACATAACTTATTGCGATATGGTTACATTAAGGGCAAAGCATCTCTAATGACTTTAGCTCAACGATTAATAACATTTTTTC
ATTAATTTAAGTTGGCTAAATGCAGTTAAAATTTTTAACGGCCAGTCACCCAAAATCGTCGCTTCCATTTTCCGGAGTAATAATGAAGCATGAATTATCA
AGTATGAAGGCATTTGTCATACTGGCAGAGTCCAGTTCATTTAACAATGCTGCTAAATTACTCAATATTACGCAACCTGCATTAACGCGAAGAATAAAAA
AGATGGAGGAAGATTTACACATTCAACTATTTGAGCGTACAACTCGCAAGGTTACGTTAACAAAAGCAGGAAAAAGGTTGCTCCCGGAGGCGCGGGAATT
AATAAAAAATTCGATGAAACGCTTTTTAATATTCGTGATATGAATGCTTATCATCGTGGTATGGTGACGTTAGCGTGTATTCCGACCGCAGTATTTTATT
TTTTACCGCTGGCAATCGGTAAATTTAATGAGCTGTATCCCAATATTAAAGTGCGGATTCTGGAACAAGGCACGAATAATTGCATGGAATCGGTGCTGTG
TAACGAATCAGACTTTGGCATAAACATGAACAACGTCACAAATTCATCCATTGATTTTACCCCACTGGTCAACGAGCCGTTCGTGCTGGCCTGTCGGCGT
GACCATCCATTGGCCAAAAAGCAGCTTGTAGAATGGCAGGAGTTAGTGGGTTACAAAATGATTGGCGTACGCTCCTCCAGCGGCAACCGACTGTTGATAG
AACAACAGCTAGCCGACAAGCCCTGGAAGCTGGACTGGTTTTACGAAGTGCGTCATCTTTCGACGTCATTAGGGCTGGTGGAGGCGGGACTGGGGATTTC
GGCGCTTCCTGGTCTGGCAATGCCCCATGCGCCCTATTCTTCGATTATTGGTATCCCACTGGTGGAACCCGTTATACGTCGGACATTGGGGATTATTCGC
CGCAAAGATGCCGTGCTTTCTCCGGCAGCTGAACGCTTTTTGCCTTGCTGATTAATTTGTGGACTGACGATAAAGACAATTTGTGGACCAATATCGTCGA
ACGCCAGAGACATGCGTTACAGGAGATAGGTTAATACACCGGCGCAGGAGAGACTGCGCCGGTTAAATCAGCGGTTAGTGCGCGTTGACCACTACCCACA
TTGGCCCCTGCCCAACCGCATAGCGGCCTTTTTCATGCAGTAGCCCCTGCTCGCCAACAATTTCGTATACCGAGATGTGGTGAGATTTTTGCCCGGCGGC
AATCAGATACTTGCCGCTGTGATCAACATTGAAGCCGCGCGGCTGGGTTTCCGTTGGCTGGAAGCCTTCTTTACTCAACACGCTGCCATCTTCCGAAACG
CTGAAAACGGTAATCAGACTGGCGGTACGGTCGCAGGCGTATAAATGACGACCATCCGGGGTGATATGAATATCAGCCGCCCAACGGGTGTCGGAGAAGT
TTTCCGGCATCATATCCAGCGTCTGGACACATTCGATATTGCCGTGCGGATCTTTCAGTTCCCAGACATCCACTGAGCTGTTTAACTCATTGACGCAATA
CGCATATTGTTCGTTTGGATGGAATACCATATGACGCGGGCCGGCCCCTTCAACGGTAGTCACTTCCGCAGGGTCCTGCGCCACCAGATGACCATCATCG
CTGACCGTAAACAGGCAAATGCGATCCTGCTTTAATGCCGGAACCCACAACGTACGGTTGTCCGGTGAGATATTGGCGGAATGGCAACCGTCCAGCCCCT
CGACCACATCGACGACGCCCACTGGCAGGCCATCTTCCAGACGCGTTACGCTCACGTTACCCGCATTATAAGAACCGACAAAGACAAACTGCCCCAGGTG
ATCGGTGGAAATATGCGTCGGGCTCCCCGGCAGCGCAGACTCTGCAGCAAAGGTCAGCGCGCCATCGTCCGGGGCGATACGATACGCCAGGACGCGAAAC
TCAGGGCGAACACCAACATAGAGATAGCGTTTGTCCGGGCTGACCACCATCGGCTGCACCTGCCCCGGCACATCGACAACCTGTGTCAGCGTCAGTGCGC
CTTCATGATTCAGGTTCCAGACGTGAATTTGCTGGCTCTCAGGGCTGGCGATATAAACTGTTTGCTTCATGAATGCTCCTTTGCATTTAGCAACTGACTG
TAACAGCTAAAATTAGTCGCTTTTGGCGGTGAATGCTGAATTAAAACGCAGAATTTTGTCCGATAGTGGTATCGGTGTACCATTCGCGCAGACGAAAATT
CTTAACCTTAATCTGGAATACGCCATGACCACACGCGTGATTGCTCTCGACTTAGACGGCACCTTATTGACCCCGAAAAAGACCCTGCTTCCTTCATCGA
TAGAAGCCCTGGCCCGCGCTCGCGAAGCAGGCTATCGATTAATCATCGTCACAGGTCGCCATCACGTCGCTATTCATCCTTTTTATCAGGCGCTGGCGCT
GGATACACCTGCTATTTGCTGTAATGGCACCTATTTGTATGATTATCATGCAAAAACCGTGCTGGAAGCGGACCCAATGCCCGTTAATAAAGCCCTGCAA
CTCATTGAGATGCTGAATGAGCACAACATTCACGGTCTGATATATGTGGATGATGCGATGGTTTATGAGCACCCGACCGGACATGTCATTCGCACGTCTA
ACTGGGCGCAAACCCTGCCGCCGGAACAGCGTCCGACTTTCACACAAGTCGCTTCTCTGGCTGAAACGGCGCAACAAGTTAACGCCGTATGGAAGTTCGC
CCTGACGCACGATGACCTGCCGCAATTGCAGAATTTTGGTAAGCATGTCGAACATGAACTGGGACTGGAGTGTGAATGGTCCTGGCACGATCAGGTTGAT
ATTGCACGCGGCGGCAACAGCAAAGGTAAACGTTTGACGAAATGGGTTGAGGCGCAAGGCTGGTCGATGGAAAACGTCGTGGCCTTCGGCGATAACTTCA
ATGATATTAGTATGCTGGAAGCCGCTGGTACAGGCGTGGCGATGGGCAACGCCGATGACGCAGTAAAAGCGCGCGCCAACATTGTGATTGGTGATAACAC
CACCGACAGCATTGCCCAGTTCATTTATAGCCACCTGATTTAATCAGGCGGTTATCGACACACTTTTAATTTGCGCATACAGCCACAGGCCAGGTTTGAT
CGCCAGTTCATCCCTGGCCCACGGGCTGATACGCGCCCACAGCGTTTTACCGCCGACTTCCAGCTCCACTTCCACCTGGCCGTTGTCGTCATAACTATTA
ACAACTTTTGCCCGCAATACGTTACGAATGCTGGTTTGCTGTGGCGGTTGTAAAACCAGCGAGACATCGGAAGCCTGAATGCGGATGCGTAGCGCAGCTT
GCAGCGGTTCGTCCAGCTTATTGACCCACAAATGCTGATCGCCCAGCGCCAGCGCGGTCATCGCGTAATGCGGATGATGCTCAAGTACTGTCACTTTCAG
AATGCTACTTTGTTGCTCTTTCGGTAGCCACGGATTCATCACGCTACTACCCCAGACTTCTTCCAGCGCGCCAAAGGCTTTCACCTGACCGTTTTCCAGT
ACCATCACTCTGTCTGCCAGATGGAGGATCTCATCCAGCGAATGGCTGACATACAACATCGGAATGTTGATTTCCCGCGTCAGACGTTGCAGATAAGGCA
ACAGTTCGCGTTTACGCGGAATATCCAGTGACGCCAGCGGTTCATCCAGCAACAGCAATTCCGGTGCTGTCAGCAAAGCCCGACCAATCGCCACGCGCTG
TTTTTCGCCTCCGGACAGGCTGCCTGGTAAACGATCAAGCAACGGTTCAATGCCTAAAAGCGCCACCAGCTTATCGAACTGATTGACCATGCTTTTCGCC
ATGCCGTAGCGCAAATTGCCACGCACTTTATAATGCGGAAACAGCCGCGCATCCTGAAACACATAGCCTACGCGACGCTTTTCTGGCGTCAGGCAGATAC
CTTTATCGGCGTCATTTAGTACCCGACCATTGAGGACAATCCGCCCTTTTTGCGGACGTGTCAGCCCACTGATGGCGTTAATCAGCGAGGTTTTTCCGGC
ACCAGAGACACCAAAAATAGCGGTGATGCCATTGGCGGGCAGCGTTTCATTAATCGTCAGGCAATGGTTGCCCAACGTCTGGGAAAAATTCAGTTCCAGC
ATGATTAGCGCCCCGCCCGCTCACGGCTGATTCTGGCCAGCCATTCTGAAATCAACAGGGAGATCATCGCCAGCGCAATAGAAATAATACACAGTCTCGC
CGCGCCACTTTCCCCGCCAGGGGTCTGGATCAGGGTATACATGGCAGAAGGAATGGTTCGCGTTTCACCAGGAATGTTAGAAACAAAGGTGATGGTTGCG
CCAAATTCACCGAGCGAACGAGCGAATGCCAGCACCGTACCAACAATAATTCCCGGTAAGGTCAGCGGTAACGTGATAGTAAAGAAAACGCGCCAGCGCC
CGGCCCCCAGTGTTCTTGCGGCCTGCTCCAGTTTGATATCAACACCTTCCAGCGCCAGACGAATCGCCCGCACCATCAGCGGAAAAGACATGACAGCGGC
AGCGAGAACCGCACCACGCCAGCTAAACGCGAAAGAAAGACCAAACCAGTCATACAGACGTTCACCGATAAATCCGCGCCGTCCCATCGAAACTAATAAT
AGGTAACCGACGACCACGGGCGGTAACACCAGCGGTAGATGCAGTACGCTGTCGAGCAGAGCTTTGCCCGGAAACGTGCAACGTACCAGTAACCAGGCAA
AAAGATCCCAAACGGCAGGCTAAACAGCACAGCCAGGGAAGAAACTTTCAGGCTTAATAAAACTGCCTGCCATTCTGGATCGGTCAGTATCATTACTTGG
TTGTAAATCCGTAACGTTTAAAGATTTCCGCAGCCTGCGGCCCCTTCAGATAATCATAAAATGCTTTCACTGTCGCATTGTTATGCCCTTCCACAACAGC
AACCGGATATTCCACTTTTTTATGTGGATCTTCCGGGAAGGTGGCAACCACTTTTACCCCTTTGCTGGCAACTGCGTCAGAACCGTAAACAATACCCAGC
GGCGCTTCATTGCGTTCGACCAACGCCAGCGCGCCACGAACATCTTCCGCCGGAGCCAGTTTCGGGGAGAGCGTATCCCATGCGCCCAGTTTTTGCAGTG
CTTCTTTCGCATAAATGCCAGCAGGGACATGTTCCGGATCACCAACCGCGAGGCGACCGCCATTCAGCAGCGAAGTCCAGTTGGTTTTGCTGTCGATGGT
GAAATCTTTCTGCTCGCTGGCTTTCGGTGCTACAACGACCAGGCTATTGCCGAGCAGTGTCTGGCGCGAAGCCGTATCGATCGCTTTTTTATCAACCGCA
TAATCCATCCATTTCTGATCGGCAGAAATAAACAGATCCGCAGGCGCACCCGCTTCAATCTGACGGGCCAAAGTAGATGACGAAGCGAAAGAAGAAACCA
CATCCACGCCTTTCTCTTTTTTATACTGCGTAGCAATGTCCTGCATTGCGTTAGTCAGTGATGCGGCGGCGAACACCGTGATTTTCCCTTCATCTGCCAG
TGCATTGCCAGCAACAGCGAAAGAGAGTGCCGCCCCGGTAAACAAGTTCAACCATTTACGAGCCATTGGTAACCCCTTAATGTAACGTTATGTAGGCGTC
AATATAACGGCAAGTTCGGAATTTTCCCAGCAGTTATTGCTAACCTTTGTGAGGTAGATGAGAAAAAATATCGGCAGAAAAAGCAGGAAGTTGAGAAAAA
GAAAATGCCCGACTAAGCGGGCATTCAGGGAATCAATGATTTTGTCCGGGCTGGTCTTTTTTACCAACACCAGAAAAGATGTTGAATACTTCACCAAGAC
CGTAAATCAGACCCAGGATGATGGCCATCACGACAGGTACCATGATTACGGCGAATACCAGACTTTTTAATAACTCTAACATGGTCAACTCCAGATATAG
TCATGAGACTATTCTAACCGCTAAGCACAGAAAAGCACTCCCCTTTTGTGCGGTCAGCTTTGCGTGGCGTTCGTTTTCCGTCACAATAAGACTTTTGCCA
GGACATTGTTATGCAGGCCGAAATCCTTCTCACCCTTAAGCTCCAACAAAAATTATTCGCCGACCCGCGCCGCATTTCGCTACTAAAACACATTGCGCTT
TCCGGTTCCATTAGCCAGGGAGCGAAAGATGCCGGTATCAGCTATAAAAGCGCCTGGGATGCCATTAACGAGATGAATCAGTTAAGTGAGCATATTCTGG
TTGAGCGCGCAACAGGCGGTAAAGGTGGAGGCGGCGCAGTACTGACCCGCTATGGTCAGCGACTGATTCAGCTCTATGACTTACTGGCGCAAATCCAGCA
AAAAGCCTTTGATGTGTTAAGTGACGATGACGCCCTGCCGCTGAACAGCCTGCTGGCCGCGATCTCACGTTTTTCACTGCAAACCAGCGCCCGTAACCAG
TGGTTCGGTACCATCACCGCCCGCGATCATGATGACGTTCAACAGCATGTTGATGTCTTACTGGCTGATGGAAAAACACGCCTGAAAGTCGCAGTTACCG
CACAAAGCGGCGCGCGTCTGGGGCTGGATGAAGGCAAAGAAGTGTTGATATTGCTAAAAGCGCCGTGGGTAGGTATTACTCAGGACGATGCGGTCGCGCA
AAACGCTGACAACCAATTACCGGGTATTATTAGTCATATTGAGCGCGGCGCAGAGCAGTGCGAAGTATTAATGGCGCTACCCGACGGGCAAACACTGTGC
GCCACAGTGCCGGTAAATGAAGCGACTTCTCTTCAGCAAGGACAGAATGTCACGGCCTACTTTAATGCCGACAGCGTGATTATCGCCACGCTGTGCTAAG
CGTGTTGACAATTTGTTATGAAACACGTATCCCTGTCAGTAATCGCTGCACAAAATGGGATATAAAATGTCATCGTTGCAAATTTTGCAAGGCACGTTTC
GTCTTGGCGACACAAAAACGCTGCAATTGCCTCGGCTAACGTTAAACGCGGGTGATAGCTGGGCGTTTGTCGGTTCGAATGGAAGCGGGAAATCGGCGCT
GGCCCGCGCGCTGTCGGGGAACTTCCGCTTTTGAAAGGTGAACGGCAAAGCCAGTTTTCCCACATCACTCGTCTCTCCTTCGAGCAATTGCAAAAGCTCG
TCAGCGACGAATGGCAGCGGAATAACAGCGATATGCTCGGCCCTGGCGAAGATGACACCGGGCGTACCACGGCTGAGATCATTCAGGATGAAGTAAAGGA
TACTCCGCGTTGCATGCAACTGGCGCAGCAATTCGGTATTACCGCCCTCCTCAACCGACGCTTTAAATACCTTTCCACTGGCGAGACGCGAAAAACCCTG
CTGTGTCAGGCGCTGATGTCGGAGCCTGACTTGTTGATCCTTGATGAACCGTTCGATGGCCTGGATGTTGCCTCACGTCAGCAGCTGGCTGAGCTACTCG
CCTCGTTACATCAGTCCGGTATTACTCTGGTACTGGTGCTCAATCGCTTCGATGAGATCCCGGAATTTGTCCAGTTTGCTGGCGTGCTGGCGGATTGCAC
GTTAGCGGAAACTGGCGCTAAAGAAGAACTGCTCCAACAAGCACTCGTTGCGCAACTGGCGCATAGCGAACAGCTTGAAGGTGTGCAACTGCCGGAGCCA
GATGAACCTTCAGCACGTCACGCCTTACCCGCCAACGAACCGCGCATTGTGCTGAACAATGGCGTGGTTTCTTATAACGAACGCCCCATTCTTAATAACC
TTAGCTGGCAGGTGAATCCAGGCGAACACTGGCAAATTGTCGGGCCAAATGGCGCGGGAAAATCGACGTTATTAAGCCTGATTACTGGCGATCATCCGCA
AGGTTACAGCAACGATTTGACGCTTTTCGGACGACGTCGCGGCAGCGGCGAAACCATCTGGGATATCAAAAAGCATATCGGTTACGTCAGCAGTAGTTTG
CATCTGGATTACCGGGTCAGCACTACTGTGCGTAATGTGATCCTTTCTGGCTATTTTGATTCGATTGGCATTTATCAGGCCGTTTCGGATCGCCAGCAAA
AACTGGTGCAGCAGTGGCTGGATATTCTCGGCATTGATAAACGCACGGCTGACGCTCCTTTCCATAGTCTTTCCTGGGGACAGCAGCGTCTGGCGCTGAT
CGTCCGTGCGCTAGTGAAACATCCGACGTTGCTTATTCTCGATGAACCACTACAGGGGCTTGATCCGCTCAATCGCCAGCTTATCCGCCGTTTTGTTGAT
GTGCTGATTAGCGAAGGTGAAACGCAATTGTTGTTTGTTTCGCACCACGCTGAAGATGCGCCTGCCTGTATTACCCATCGTCTTGAGTTCGTGCCGGACG
GTGACTTTTATCGCTATGCGCTGACAAAAATAAACTGAGTCGGTAGTGCTGACCGTGCCGGAGGCGGCGTAAACGTGTTATCCGGCCAACGGTTTGACGC
ATGCAGGCATGAAATTCAGATAAAAAGCGCAATCATTCATAAACCCTCTGTTTTATAATCAATTAATCGCACATTAAAAACGGCTAAATTCTTGTGTAAA
CGATTCCACTAATTTATTCCATGTCACACTTTTCGCATCTTTGTTATGCTATGGTTATTTCATACCATAAGCCTAATGGAGCGAATTATGAGAGTTCTGG
TTACCGGTGGTAGCGGTTACATTGGAAGTCATACCTGTGTGCAATTACTGCAAAACGGTCATGATGTCATCATTCTTGATAACCTCTGTAACAGTAAGCG
CAGCGTACTGCCTGTTATCGAGCGTTTAGGCGGCAAACATCCAACGTTTGTTGAAGGCGATATTCGTAACGAAGCGTTGATGACCGAGATCCTGCACGAT
CACGCTATCGACACCGTGATCCACTTCGCCGGGCTGAAAGCCGTTGGCGAATCGGTACAAAAACCGCTGGAATATTACGACAACAATGTCAACGGCACCC
TGCGCCTGATTAGCGCCATGCGCGCCGCTAACGTCAAAAACTTTATCTTTAGCTCCTCCGCCACCGTTTATGGCGATCAGCCCAAAATTCCATATGTTGA
AAGCTTCCCGACCGGCACACCGCAAAGCCCTTACGGCAAAAGCAAGCTGATGGTGGAACAGATCCTCACCGATCTGCAAAAAGCCCAGCCGGACTGGAGC
ATTGCCCTGCTGCGCTACTTCAACCCAGTTGGCGCGCATCCGTCGGGCGATATGGGCGAAGATCCGCAAGGCATTCCGAATAACCTGATGCCATACATCG
CCCAGGTTGCTGTAGGCCGTCGCGACTCGCTGGCGATTTTTGGTAACGATTATCCGACCGAAGACGGTACTGGCGTGCGCGATTACATCCACGTAATGGA
TCTGGCGGACGGTCACGTCGTGGCGATGGAAAAACTGGCGAACAAGCCAGGCGTACACATCTACAACCTCGGCGCTGGCGTGGGCAGCAGCGTGCTGGAC
GTGGTTAATGCCTTCAGCAAAGCCTGCGGCAAACCGGTTAATTATCATTTTGCACCGCGTCGCGAGGGCGACCTTCCGGCCTACTGGGCGGACGCCAGCA
AAGCCAACCGTGAACTGAACTGGCGCGTAACGCGCACACTCGATGAAATGGCGCAGGACACCTGGCACTGGCAGTCACGCCATCCACAGGGATATCCCGA
TTAAGGAACGACCATGACGCAATTTAATCCCGTTGATCATCCACATCGCCGCTACAACCCGCTCACCGGGCAATGGATTCTGGTTTCACCGCACCGCGCT
AAGCGCCCCTGGCAGGGGCGCAGGAAACGCCAGCCAAACAGGTGTTACCTGCGCACGATCCAGATTGCTTCCTCTGCGCAGGTAATGTGCGGGTGACAGG
CGATAAAAACCCCGATTACACCGGGACTTACGTTTTCACTAATGACTTTGCGGCCTTGATGTCTGACACGCCAGATGCGCCAGAAAGCAACGATCCGCTA
ATGCGTTGCCAGAGCGCGCGCGGTACCAGCCGGGTGATCTGCTTTTCACCGGATCACAGTAAAACGTTGCCAGAACTGAGCGTTGCGGCATTGACGAAAA
TCGTCAAAACCTGGCAGGAGCAAACCGCAGAGCTGGGAAAAACGTACCCGTGGGTACAGGTCTTTGAAAACAAAGGCGCGGCGATGGGCTGCTCTAACCC
GCATCCGCACGGACAGATTTGGGCAAATAGCTTCCTGCCTAACGAAGCTGAGCGCGAAGACCGTCTGCAAAAGAATATTTCGCCGAACAGAAATCGCCAA
TGCTGGTGGATTATGTTCAGCGCGAGCTGGCAGACGGTAGCCGTACCGTTGTCGAAACCGAACACTGGTTAGCCGTTGTACCTTACTGGGCTGCCTGGCC
GTTCGAAACGCTACTGCTGCCCAAAGCCCACGTTTTACGGATCACCGATTTGACCGACGCCCAGCGCAGCGATTTGGCACTGGCGTTGAAAAAGCTGACC
AGTCGTTATGACAACCTCTTCCAGTGCTCCTTCCCCTACTCTATGGGCTGGCACGGCGCGCCATTTAATGGCGAAGAGAATCAACACTGGCAGCTGCACG
CGCACTTTTATCCGCCTCTGTTGCGCTCTGCCACCGTACGTAAATTTATGGTTGGTTATGAAATGCTGGCAGAAACCCAGCGAGACCTGACCGCAGAACA
GGCCGCAGAGCGTTTGCGCGCAGTCAGCGATATCCATTTTCGCGAATCCGGAGTGTAAGAAATGAGTCTGAAAGAAAAAACACAATCTCTGTTTGCCAAC
GCATTTGGCTACCCTGCCACTCGCACCATTCAGGCGCCTGGCCGCGTGAATTTGATTGGTGAACACACCGACTACAACGACGGTTTCGTTCTGCCCTGCG
CGATTGATTATCAAACCGTGATCAGCTGTGCGCCACGCGATGACCGTAAAGTTCGCGTAATGGCAGCCGATTATGAAAATCAGCTCGACGAGTTTTCCTC
GATGCGCCCATTGTCGCGCATGAAAACTATCAATGGGCGAACTACGTTCGTGGCGTGGTGAAACATCTGCAACTGCGTAACAACAGCTTCGGCGGTGTGG
ATATGGTGATCAGCGGCAATGTGCCGCAGGGGGCCGGGTTAAGTTCTTCCGCTTCACTGGAAGTCGCGGTCGGAACCGTATTGCAGCAGCTTTATCATCT
GCCGCTGGACGGCGCACAAATCGCGCTTAACGGTCAGGAAGCAGAAAACCAGTTTGTTGGCTGTAACTGCGGGATCATGGATCAGCTAATTTCCGCACTC
GGCAAGAAAGATCATGCCTTGCTGATTGACTGCCGCTCACTGGGGACCAAAGCAGTTTCCATGCCCAAAGGTGTGGCTGTCGTCATCATCAACAGTAACT
TCAAACGTACCCTGGTTGGCAGCGAATACAACACCCGTCGTGAACAGTGCGAAACCGGTGCGCGTTTCTTCCAGCAGCCAGCCCTGCGCGATGTCACCAT
TGAAGAGTTCAACGCTGTTGCGCATGAACTGGACCCAATCGTGGCGAAACGCGTGCGTCATATCCTGACTGAAAACGCCCGCACCGTTGAAGCTGCCAGC
GCACTGGAGCAAGGCGACCTGAAACGTATGGGCGAGTTGATGGCGGAGTCTCATGCCTCTATGCGCGATGATTTCGAAATCACCGTACCGCAAATTGACA
CTCTGGTAGAAATCGTCAAAGCTGTGATTGGCGACAAAGGTGGCGTACGCATGACCGGCGGCGGATTTGGTGGCTGTATCGTCGCGTTGATCCCGGAAGA
ACTGGTGCCTGCCGTACAGCAAGCTGTCGCTGAACAATATGAAGCAAAAACAGGTATTAAAGAGACTTTTTACGTTTGTAAACCATCACAAGGAGCAGGA
CAGTGCTGAACGAAACTCCCGCACTGGCACCCGATGGTCAGCCGTACCGACTGTTAACTTTGCGTAACAACGCAGGGATGGTAGTCACGCTGATGGACTG
GGGTGCGACTTTACTTTCCGCCCGTATTCCGCTTTCCGATGGCAGCGTCCGCGAGGCGCTGCTTGGCTGCGCCAGCCCGGAATGCTATCAGGATCAGGCC
GCATTTCTGGGGGCCTCTATTGGTCGTTATGCCAACCGCATCGCCAATAGCCGTTATACCTTTGACGGTGGAACCGTGACGCTTTCACCAAGTCAGGGCG
TTAACCAGCTGCACGGCGGCCCGGAAGGGTTCGACAAACGTCGCTGGCAGATTGTGAACCAGAACGATCGTCAGGTGCTGTTTGCTCTGAGTTCAGATGA
TGGCGATCAGGGTTTCCCGGGTAATCTCGGCGCGACGGTGCAATATCGTCTGACCGACGATAACCGTATCTCCATTACTTATCGCGCCACAGTTGATAAA
CCTTGCCCGGTGAATATGACTAATCACGTCTATTTCAATCTTGACGGCGAGCAGTCTGACGTGCGCAATCATAAGTTGCAGATTCTGGCGGAAGAATATC
TGCCGGTTGATGAAGGCGGCATTCCGCACGACGGCCTGAAATCTGTCGCCGGAACCTCTTTTGATTTCCGCAACGCCAAAATCATCGCCAGTGAGTTTCT
TGCCGACGACGATCAGCGCAAAGTGAAAGGTTACGATCACGCGTTCTTGTTACAGGCCAAAGGCGATGGCAAGAAAGTGGCGGCGCATGTCTGGTCAGCA
GATGAAAAATTGCAGCTGAAGGTCTACACCACCGCTCCGGCTCTGCAATTCTACTCCGGCAACTTCCTCGGCGGCACACCGTCGCGGGGAACCGAACCTT
ACGCCGACTGGCAAGGGCTGGCTCTGGAAAGCGAATTTCTGCCGGACAGCCCGAACCACCCTGAATGGCCGCAACCGGACTGCTTCCTGCGTCCTGGCGA
AGAGTATTCCAGCCTGACAGAATATCAGTTTATTGCTCAGTAATGTTAAGCCCTCGTCACGAGGGCTTTATCCTCATATTGTTCAAATCACCAGCAAACA
CCGACATATTTGCAACTCAATATTCACAACAACCTTACACTGCGACACTATTTTCGCTATGGTTATGCGTAAGCATTGCTGTTGCTTCGTCACGGCAATA
TAATGAGAATTATTATCATTAAAAGATGATTTGAGGAGTAAGTATATGGCTGTAACTAAGCTGGTTCTGGTTCGTCATGGCGAAAGTCAGTGGAACAAAG
AAAACCGTTTCACCGGTTGGTACGACGTGGATCTGTCTGAGAAAGGCGTAAGCGAAGCAAAAGCAGCAGGTAAGCTGCTGAAAGAGGAAGGTTACAGCTT
TGACTTTGCTTACACCTCTGTGCTGAAACGCGCTATTCATACCCTGTGGAATGTGCTGGACGAACTGGATCAGGCATGGCTGCCCGTTGAGAAATCCTGG
AAACTGAACGAACGTCACTACGGTGCGTTGCAGGGTCTGAACAAAGCGGAAACCGCTGAAAAGTATGGCGACGAGCAGGTGAAACAGTGGCGTCGTGGTT
TTGCGGTGACTCCGCCGGAACTGACTAAAGATGATGAGCGTTATCCGGGTCACGATCCGCGTTACGCGAAACTGAGCGAGAAAGAACTGCCGCTGACGGA
AAGCCTGGCGCTGACCATTGACCGCGTGATCCCTTACTGGAATGAAACCATTCTGCCGCGTATGAAGAGCGGTGAGCGCGTCATCATCGCCGCACACGGT
AACTCGTTACGTGCGCTGGTGAAATATCTCGATAACATGAGCGAAGAAGAGATTCTTGAGCTGAATATCCCGACCGGCGTGCCGCTGGTTTATGAGTTTG
ACGAGAACTTCAAACCGCTGAAACGCTATTATCTGGGTAATGCTGACGAGATCGCGGCGAAAGCAGCGGCGGTTGCTAACCAGGGTAAAGCGAAGTAAAC
GTCATTCGTTTAAAAATGAGAAAGCCGACTGCAAGTGAGTCGGCTTTTTTGTTTGTCGTTGCTAACAATGGAGCACATTGCCTGATGCGACGCTGCGCGT
TTTATCAGGCCTCCGGTGATTAATCGGATACGCCACTCTGACGGCGCATCCGACAATTAAACTTTACCCGCGACGCGCTTTTACTGCATTCGCCAGTTGA
CGTAACAGAGCATCGGTATCATCCCAGCCAATGCAGGCATCGGTGATGCTCTTACCGTAGGCCAGCGGTTCCCCGCTCTCGAGGCTCTGATTGCCTTCCA
CCAGATGGCTTTCCACCATCACGCCAATAATGGCCTTTTCGCCACCGGCAATCTGCTGGCAAACGTCAGTACAAACATCCATCTGCTTTTTGAATTGTTT
TGACGAGTTAGCATGGCTGAAATCGATCATCACCTGCGCTGGCAGGCCTGCTTTGTTCAGCCCTTCTTTCACTTCAGCAACGTGCTTCGCGCTGTAGTTA
GGCTCTTTACCGCCGCGCAGAATGATATGGCAATCGCCGTTACCGCTGGTATTCACAATCGCCGAATGCCCCCATTTCGTTACGGACAGGAAGCAGTGCG
GCGCACCGGCGGCATTAATGGCATCGATAGCCACTTTAATCGTACCATCAGTGCCATTTTTGAAGCCTACCGGGCAAGAAAGCCCTGATGCCAGTTCGCG
GTGCACCTGCGATTCCGTAGTACGTGCGCCAATTGCGCCCCAGCTCATCAGGTCAGCGAGATATTGTGGGGTGATCATATCCAGGAATTCACCCGCCGCT
GGCAGACCGCTGTCGTTAATATCGAGCAGCAATTTGCGGGCAATACGCAGACCGTCGTTGATCTGGAAGCTGTTATCCATATGCGGATCGTTAATCAGCC
CTTTCCAGCCCACCGTAGTACGCGGCTTTTCAAAATAGACGCGCATCACGATTTCCAGCTCATCTTGCAGCTCTTCACGCAGCGTCAGCAAGCGAGCGGC
ATACTCTTTAGCCGCGACAGGATCATGAATTGAGCATGGGCCAATCACCACCAACAGGCGATCATCATTACCTTTCAGGATTTTATGGATCGCTTTTCGG
GCATGGGCGACCGTATTCGCGGCATTTTCAGTAGCGGGGAATTTTTCCAGCAATGCGACAGGAGGAAGTAACTCTTTGATTTCTTTGATGCGTAAATCGT
CGTTCTGATAATTCATGTCTGTTCCAGTGTTGCCATACTTATCTTAGTGAATGCAATACTTCCAATCTATATCTTCCGTCAGAATGTGTAAACGGGGTTT
TACACTATGAACGGATTAATCCTGGAATTAGCAAGAAAAACGCCAGATTGTCGCGAAAAACGAGATCTCTCCTACAATTTCTAACTGTAACTCCTTTGTT
TGTTAATTATTTCAAGATTCTCTGCTGGGTATCTTTGCCTGGCTGAAATCTTAAACCATTGCCTGATATTCACCTGCAAATGCACTGTTGGAAGAGGTTA
TCCGACATAACGACCATAACAGGAGCATCCTATGAAAATGACAAAACTGGCCACACTATTTTTGACTGCCACTCTAAGCCTTGCCAGCGGTGCCGCACTG
GCTGCCGATAGCGGAGCGCAAAGCAATAACGGCCAGGCAAACGCCGCCGCTGATGCGGGCCAGGTAGCCCCTGACGCCCGTGAAAATGTCGCGCCAAATA
ACGTCGACAATAACGGGGTAAATACCGGTTCTGGTGGCACAATGCTGCATTCGGATGGTTCTTCAATGAACAATGACGGAATGACCAAAGATGAAGAGCA
CAAGAACACCATGTGCAAAGATGGTCGCTGTCCGGATATCAATAAAAAAGTCCAAACCGGTGATGGCATCAACAATGATGTCGATACCAAAACCGACGGT
ACCACGCAGTAACCCTGCGAAATAGCCAATAATGGGAGAGCGGAGTCTCTCCCTTTTAATTTTTCCTTCTAAAAGCAGTATGATGTCATAAAGTTAAGTG
AGAATAATTAAGGGATGACTCGTCATGGCGCACTCACACTCACACACTTCCTCACACCTGCCAGAAGATAATAATGCTCGTCGCTTGTTGTATGCTTTCG
GCGTGACTGCCGGGTTTATGCTCGTAGAAGTCATTGGTGGTTTTCTTTCCGGTTCTCTGGCATTGCTGGCCGATGCGGGTCATATGTTGACCGATACTGC
CGCCCTGCTTTTCGCCCTACTCGCCGTGCAATTTTCACGTCGTCCTCCCACCATTCGCCACACTTTCGGTTGGCTAAGATTGACCACGCTCGCGGCGTTT
GTGAATGCCATCGCCCTGGTGGTAATTACCATTTTGATTGTCTGGGAGGCGATAGAACGCTTCCGCACGCCGCGTCCGGTCGAGGGCGGCATGATGATGG
CAATTGCCGTGGCTGGGCTGTTGGCAAATATACTTTCTTTCTGGTTACTTCATCACGGCAGCGAAGAGAAAAACCTCAACGTGCGAGCAGCGGCACTGCA
TGTGCTCGGGGACCTGCTGGGTTCGGTTGGGGCTATTATTGCCGCGTTGATTATTATCTGGACCGGCTGGACACCTGCTGACCCCATTCTCTCAATACTG
GTGTCGCTTCTGGTTCTGCGTAGCGCGTGGAGACTGTTGAAAGATAGTGTGAATGAATTACTTGAAGGTGCACCGGTATCGCTGGATATCGCTGAACTGA
AGCGTCGCATGTGCCGGGAAATCCCGGAAGTCCGCAATGTGCACCATGTGCATGTATGGATGGTAGGCGAGAAGCCGGTGATGACGCTGCATGTGCAGGT
GATCCCGCCACACGATCACGATGCCTTGTTGGATCAGATCCAACACTACCTGATGGATCACTATCAGATTGAGCACGCCACCATTCAGATGGAATATCAA
CCTTGTCATGGGCCAGACTGCCACCTGAATAGAGGGGTGTCTGGCCATTCACATCATCATCATTAATGGGACAGCGCACGTGAACCTCTTTCGCGTGCGC
TTTTGATCCACATCCGGCTGCCGTTGAGCGCAATAAAGGTCAGAATGATGTACTCCAGAGACATGGCGTAAACGCCCTGAAGTGCAAAAATAACGACGCT
AATCACGTTAATAATCACCCACAACAGCCAGTTTTCCACATACTTACGTGTCATCAGAATCATTGCCACGATAGATAACACCATCATGCATGAATCCCAG
AACGGGAAAGCGTCCGGCTGTAGTTCAGGCATCGCAACCTGTAATCCTAATGCTTGCATGATCATGACTGCCACGCGGGTCAAAAATACAAACACCGGAT
TGATAAATACCGTCATCAGACCAATCGAAACAACGCAAACCGCCAACCAGATTAGCGCCTTCGGCAATGGCAACCAGCGAATTTTCAACTCCGCCTCGTT
CTGACTGGTTTGTCGCGACCACGCATACCAGCCGTAAATATTCGCGGCAAAGAAAAACACCTGTAATAGCAGGCTGACATACAGCTGAATCTGAAAGAAA
ATAATGCCAAACAAAGTGACGTTGATCAGGCCAAAGAAGTAGTTACTGATCTTCTCCAGACTGGCAAGGCCAATACACAGCAACCCGGCGATCGTGCCTA
CCGCTTCGATCCATGAGAGATCATAACCGCCTGCCCCTATTGGTATATGTACCAGGATATTCTGCACACTAAAAAATCCATCGTTCCCCCAAAGCGTAAT
GTGACGCCTTATTATCAATTATCCACGTAGTGTAGCCGCAAAATCCAGCATACGATTGAGCGGCACCAGCGCCCTCTCTCGCAGCCTTTCATCAACATAA
ACCTCGTGATTGCTTCCTTCCTGTTCTAATGCCTCTGCGATGGCCTGAAGGCCATTCATGGCCATCCACGGGCAATGCGCGCAGCTGCGACAGGTTGCGC
CCTCCCCGCGGTTGGTGCTTCCAGTAACTCTTTATCTGGCACCGCCTGCTGCATTTTGTAGAAAATGCCCCGATCGGTTGCCACGATAAGCCGCTGATGT
TGCAATGTTTTCGCAGCAGCTATCAGTTGACTGGTGGAACCGACCGCATCCGCCATCTCTACAATAGCTTGCGGTGATTCTGGATGCACCAGTATGGCAG
CATCCGGGTATTCTTCTTGCAAGCGGGTTAACGCCTGAGTCTTAAACTCATCATGCACAATGCAGGCACCCTGCCAGCATAAAATGTCTGCGCCCGTCTG
TTTTTGCACGTAACGCCCCAGATGTGTGTCAGGTGCCCAGATGATTTTTTCACCCAAACTATCCAGATGATCAATAAGTTCGACGGCAATGCTTGAAGTT
ACCACCCAATCTGCACGCGCTTTTACCGCAGCAGAAGTGTTGGCGTAGACGACGACAGTACGATCGGGATGGGCATCGCAAAATGCGTTAAATTCTTCAA
CAGGGCAGCCGAGATCCAGTGAACATTCAGCCTGAAGTGTCGGCATCAGAATTGTTTTTCCGGACTGAGAATTTTGGCGGTTTCTCCCATAAATCTCACC
CCAGCGACTAACAACGTAGAAGCGGGATGCTTTGCACCGAAGCGCGCCATTTCCAGAGAATCAGAAATACAGCCACCGGTTTCTTCTGCCAGTTGTTGAA
TTTCGGGATCGGTATAGTAGTGGGCAACCATCACCGCATTACGTTCTTTTAGTAGACGTTTTATCTTCTCGCGGTAATACGCTTTTTCATCAATGCTTAA
CGGCGTCGGCTTCGGGGGAAAGGATAAATCGCCGTGTCTGGATCAAACATCACGCTCATCTTACCATCTCGTTCTACAGGCTTAACGTTAAAACCGACTT
AAGCGTGATATTCGCTATTATCGGCGTAATTTGTTTTGTATACTAAACAAGATAGTCGAATGGTGGGGAAAAGTCACTCGAATTACGTATGAGATGCCGA
ATGCCACACTTTGCGTCTTATTCCTCCGACGTAGAGTTGTTTACGCAGCAAACGCGGAGTATGTCATCAGGGTCAAGAATTGAAATTGAGAGATGCCTGA
ATAGCAAAAAAGCGCCTTTAGGGCGCTTTTTTGCATTGGTGGGTCGTGCAGGATGACTCGCTTCGCTTGCCCTTCGGGCCGTCGCCGCGAGCGGCTCCGT
TGTTTCGCTGCGCTCAACTCAAACCTGCTGCAGGTTCGAATCTTTGAGTATCGCAGATAGCAAAAAAGTGCCTTTAGGGCGCTTTTTTACATTGGTGGGT
CGTGCAGGATTCGAACCTGCGACCAATTGATTAAAAGTCAACTGCTCTACCAACTGAGCTAACGACCCCTTGCGGGATTATGCTGCTTTAATCATTCAGG
ATGGTGGGTCGTGCAGGATTCGAACCTGCGACCAATTGATTAAAAGTCAACTGCTCTACCAACTGAGCTAACGACCCCTTGCGGGATTATGCTGCTTTAA
TCATTCAGGATGGTGGGTCGTGCAGGATTCGAACCTGCGACCAATTGATTAAAAGTCAACTGCTCTACCAACTGAGCTAACGACCCATACGGGTGTTACC
TGAAAGATTTCTACTCGGAACCAATGTTTAAAATTGGTGGGTCGTGCAGGATTCGAACCTGCGACCAATTGATTAAAAGTCAACTGCTCTACCAACTGAG
CTAACGACCCGAGTGGTGGGTGATGACGGGATCGAACCGCCGACCCCCTCCTTGTAAGGGAGGTGCTCTCCCAGCTGAGCTAATCACCCGATACTGCGCT
GGATACTACAAACTACTTCCACCGAACCCACCGTCATTAGTGGTGGGTCGTGCAGGATTCGAACCTGCGACCAATTGATTAAAAGTCAACTGCTCTACCA
ACTGAGCTAACGACCCGGTGGTGGGTGATGACGGGATCGAACCGCCGACCCCCTCCTTGTAAGGGAGGTGCTCTCCCAGCTGAGCTAATCACCCGATACT
ACGCTGGATACTACAACTAACTATGTTAGTGGTGGGTCGTGCAGGATTCGAACCTGCGACCAATTGATTAAAAGTCAACTGCTCTACCAACTGAGCTAAC
GACCCACTTTTTCGTTGCTTCGGTTTGTTTGATATCCCGTGGCAACGGCGGCATATATTACTGATTTCAGACTTGAGCGCAACAAAAATTTCGATGTAGA
TCACTCAACTGCTTATGATTCGCACGACACGACCAGAAATAATGCGACTTCTGGTCGTGTGTTATGCATTACATAGCGTTCAGACGTTTTTGCGCCTGTT
TAGCGCCATCAGTACCAGGGTATTTACTGATAACCTGCTGGTATACGGCTTTCGCTTTTGCGGTGTCACCTTTGTCCTGCATGATGACGCCGACTTTAAA
CATCGCATCTGCAGCCTTCGGTGACTTCGGATAGTTTTTCACTACCGAAGCAAAATAATACGCCGCATCATCTTTTTTACCCTTGTTGTAGTTTAACTGA
CCCAGCCAATAATTGGCGTTTGGCAGGTAAGTTGAATCAGGGTAATTTTTGATGAAATTCTGAAATGCCACCATTGCGTCATCCTGGCGGGATTTATCCT
GCACCAGCGCAATAGCTGCATTGTAATCCGTGTTTGCATCACCGCTTTTCACCGGCGCGCCAGCATTCGCAGTACCAGCATCAGCTGTCGGCGTCGTTGA
TGCCGCCACACCGTTTTGATCGCCGCTGGTTGATTGCGCCGCTGCACCACCGCTGCTGAGGCTGTCGATCTGCAACAGGATCTGCTTTTGCCGCTCCACG
ACCTGATTCAGTTGATACTGATTTTCCTGAATCTGACCACGCAGGGAATCAATATCGGATTGATTATCAGAGAGTTGTTGCTGGAGTTGGGTTAAAAGCT
GGCTGTGAGCATTAGAAATACGCTCAAGTTGAGTGACGCGGTCTTCGACCGAGCCTGAGCCGACACTACTGATTGGTGCCTGAGCAAAAGCGGCCCAGGG
GCCGCTATACCAACCAGTAACGACAGACTCAATAGTTGATGTCTGAAGTTACTGCTCATGCAATTCTCTTAGTAAACCAGTACCGCACGACGGTTTTTGG
CATACGCCGCTTCGTCATGACCCAGTACTGCAGGTTTTTCTTTACCGTAAGAAACGATGGAGATCTGGTCAGCAGAAACGCCTTTACCCTGCAGATACAT
CTTAACAGCGTTCGCACGACGTTCACCCAGGGAGATGTTGTATTCCGGAGTACCACGTTCGTCCGCGTGACCTTCTACGGTGACTTTGTAAGACGGGTTG
CTACGCAGGAAGTTTGCGTGTGCATCCAGCATTTGAGCGAAGTCAGAACGGATATCGTACTTGTCCAGATCGAAGTAAACGATGTTGTTCTGCTGCAGCT
GTTGCATTTGCAGACGAGCCTGCTCTTCGGAAGACATGTTGCCGTTGCCGCCGTTCGCATCCATACCAGTGCCGGCACCCAGCATGCCTTCGCTGCCGTC
ATTGCTGGCGTTCTTGTTGGAAGAACATGCCGCAATTGCCATAACAGGCAGAGCAATCATCAGCCCTTTCAGCACTTTGTTCAGTTGCATTTCAATGATT
CCTTTACTATTCAATTAATTATTATCACAGATACGGCGACCAGGCAGGGAATTTGACCTGTCCATCAGTTGCCGGAAGACGCGCTTTGAAACGCCCATCT
GTAGAAACCAAATTCAGCACGGATCCCATCCCCTGAGAAGAGCTGTAGATTACCATAGTGCCGTTAGGTGCCAGACTTGGCGTTTCATCCAGGAACGTGG
ACGACAGAACTTGTACGCCTCCCGTTGCCAGATCTTGTTTGGCAATGTGCTGCTGCCCACCGTTGGAGCTGACCATTACCATAAATTTACCGTCGCTGCT
GACATCCGCATCCTGGTTCTGCGAACCTTCCCAGGTAATACGTTGTGGCGCACCGCCGTTGATATTCACTTTATAAACCTGCGGACGACCGGCCTGGTCA
GAAGTAAATGCCAGGTTCTGGCTGTCCGGGAACCAGGTCGGTTCGGTATTGTTACTGCGACCATCAGTTACCTGGCGGATCTGACCAGAAGCCAAATCCA
TTACGTACAGGTTCAGGCTACCGGTTTTCGACAAGGCGAATGCCAGTTTGCTGCCGTCTGGCGAGAATGCAGGTGCACCGTTGTGACGCGGGAATGAAGC
CACCTGACGTACAGCGCCATTTGCCAGCGTCTGAATAACCAGCGCGGAACGACCGCTTTCGAAGGTCACATAAGCCAGTTTAGAACCGTCTGGTGACCAC
GCCGGAGACATCAGCGGTTGCGGTGAACGGTGAACGACAAACTGGTTGTAACCGTCATAGTCAGATACGCGCAGTTCATACGGGAACTGACCGCCGTTAG
TCTGAACAACGTAGGCAATACGGGTACGGAACGCACCTTTAATACCGGTCAGTTTTTCAAACACTTCGTCACTGGCGGTATGACCAGCATAACGCAGCCA
CTGCTTGTTCACTTTGTACGAGTTCTGAGCAAGTACAGTACCCGGTGCGCCGCCAGTGTCAACCAGTTGATAAGCGACATTGTAAGAACCATCCGGATTC
GGAGTGACCTGACCGACAACCACAGCGTCAATGCCCAGCGCGGACCATGCAGCTGGTTGTACTTCCTGCGCACTACCCGGCTGCTGTGGCAGACGAGCAC
GATCTAACGGATTAAATTTACCGCTGTTACGCAAGTCAGCAGCAACGATGCCGCCAATATCTTCAGGTGCCGCACCAGGCCCCGCCCACTGGAAAGGAAC
AACACCAATAGGACGACCGGAATCTACACCGCTGTCGATCACAATGCGGACTTCAGCATGCAGAACTGATGCCCACAGTATGAGAAAACCAAATGCTACT
CGTAATGCCTGCTTCATCATATCTCCCTTATCTGGACCGATGGCCCACGATAATTTAGCAGAATGTTAACAAACTAAAATACACAAAACTACCAGAACCC
CGTGGCAACCGGTGCCTGATGTTGACCGTCGGAACAGTCAACATCGCGATTACGGTTTGAAGTCCAATGGCGCGTTTTTGAACACTTCATATACTGCCTG
GCTTGGTGGTTTCGGGATCTTCGCAAGTTTAGCTGCTGCCAACGCAGCTTGACAAAGTGCGGGATCGCCACCTTCAGGTTTGATATCCAGTAACATACCA
TCGGGTGCCAGTTTTATGCGCAGCGTACAGGTTTTGCCTGCATAGGACGATGCGTCATAGAACTTACTTTCGATAGCAGATTTAATCTGCCCGGCATAGT
TATTGATATCGGCCCCTGATGCGCCATTGTTTTTAGTATTACCACTCCCGGCAGGCGAAGCATTGTTCCCTTTCGCCCCTCCCCCGTTTTCGGTGCATTC
TTACCAGAGCTTAGCTCACCGAAAATATCATCTGCCTCTGCGGCAGCTTTTGCTGCAGCGGCTTTTTCAGCTGCTGCTTTTGCCGCTGCCGCTTTTTTGT
CTGCGGCGGCTTTTTCTGCCGCTGCTTTCTTATCAGCTGCTGCCTTTTCAGCTGCAGCCTTTTCAGCAGCCGCTTTCTTCTCAGCTTCTGCCTTGGCTTT
TTCAGCAGCTTCGGTTGCCGCTTTCTTTCTTGCTTCAGCTGCAGCTGCTTCTGCCGCTTCAGCTTTCTTCTTCAGCGCCGCCGCAGCAGCCTCGGCTTTT
TTCTGCGCTTCGACTGCGGCTTTGGCGGCTTCTGCTTCTGCTTTTTCTTCGCGTCTGCCGCCGCTTTCTTCGCTGCTTCTTCCGCAGCTTTAGCATCCGC
TTCGGCCTTCGCTTTAGCATCTGCCGCCGCTTTCGCTGCCGCCTCTTCCGCTTGCTTCTGCTTTAACTCGGCCTGTTTTGCGGCTTCTTCAGCCTGCTTT
TTCTGCTCCTGAGCCGCTAACCGCTCTTTCTCAAGTTGCTTCAGGCGTTCCTGTTCAGCCGCTTGTTTCTCACGCAGTTCTTCAGCAGCCTGCTGCTCTT
TCATCTTGCGCTGCTCATCAGAACGCTTCGCGCTTGATTCCTGGCTTTGCATGCGTTTGTACTGCTCAACTACCGCACCTGAATCAACCATGACAGCGTC
GATGGACGAACCACCGCCGCCTCCGGCTGAAGCTTCTATATTCTCATCGAACGAACTCCAGATCAGCGCCGCAAATAAGATGACATGCAGCACTGCTGAA
ATAATTATCGCCCGCTTGAGCTTGTCGTTTTGTTCGGTTGCCTTTGACACTCTCGGTTTCCAAAAACTGTTCGCCTGTTACCCGCTCTCTTTCAAGCAAG
GGAAACGCAGATGTTTAGATAGGCTGCGTCATTAAACCAACCGATTTCACACCCGCACTATGTAACAAGTTCAGTGCTTTAATTATTTCATCGTAAGGCA
CATCTTTTGCGCCACCAATCAGAAAGACCGTTTTCGGGTTGGCCTTGAAACGGCTGGACACTTCCGCCACCACCTGCTCTGGTGGTAAACGCTCCAGGCG
ATCTTTCTCAACCACCACGGTGTACTGACCAATACCAGACACTTCAACAATCACTGGCGGATTATCATTACTGCTCACCGCCTGTGATTCAGTAGCGTCT
GGCAGATCGACCTCCACGCTCTGGGTGATGATGGGCGCTGTCGCCATAAAGATCAGCAACAGCACCAGCAGTACGTCCAGCAACGGTACAATGTTGATTT
CGGACTTGAGATCGCGACGACCTCGTCCACGCGCTCTGGCCATGGCTTACCCCTTGTTGCTCTCGCTAACGGTAAACGCCTGGCGGTGCAGAATCGCGGT
AAACTCTTCCATAAAGTTGTCGTAATTCAGTTCCAGTTTGTTTACGCGCTGGTTGAGGCGGTTATAAGCCATTACCGCCGGAATTGCGGCGAACAAACCA
ATTGCCGTCGCAATCAACGCTTCTGCGATACCGGGCGCAACCATTTGCAGTGTTGCTTGTTTTACCGCCCCGAGGGCGATAAAGGCGTGCATGATCCCCC
AGACCGTACCAAACAGACCAATATACGGGCTGATGGAGCCAACCGTACCGAGGAACGGAATGTGCGTTTCCAGATTTTCAAGTTCACGGTTCATGGAAAT
ACGCATCGCACGCGACGCCCCTTCCACTACGGCTTCCGGCGCATGGCTATTGGCACGATGCAGGCGCACAAACTCTTTGAATCCGCTGTAAAAGATTTGT
TCCGAACCGCTCAGATTATCCCGTTTCCCCTGGCTCTCTTGATAGAGGCGAGAGAGTTCGATTCCAGACCAGAATTTATCTTCAAACGCTTCGGCTTCGC
GCGCCGCTGCGTTAAGAATACGGGTCCGCTGGATAATAATGGCCCAGGATGCGATTGAAAAACCAATCAAAATCAACATGATAAGTTTAACCAGAAGGCT
AGCCTTCAGGAACAAATCAAGGATATTCATGTCAGTCACTGCTTAAACTCCGCGACAATAGACTTGGGAAGCGCACGAGGCTTCATTTTGAGTGGGTCAA
CGCAAACAACCAGAACCTCTGCTTCATTCAACAAAGTATTCTCGGCGTTGACAATACGTTGCGTGAAAACCAAAGAGGTGCCACGCATTGATGTTATTTC
AGTCTGTATTTCGAGCATATCGTCGAGCCGCGCAGGTGCGTAATATTCCACCGTCATTTTACGTACCACAAAGGCAACGCGTTCAGCCATCAGCGCCTGT
TGACTGAAATGATGATGACGCAGCATCTCTGTGCGTGCTCTTTCATAAAAAGCGACGTAACTGGCGTGGTACACCACACCACCGGCATCGGTATCTTCAT
AGTAGACGCGAACCGGCCATCGAAACAGCGTTGTATTCACTTTACATCCCGGTAATGCAACAAAAGTTAGAGCTTTTAAACGCTGCTACTATACGCGCGC
GATTGAGGTTTGGGAATGAGGGCAAGTTAAGGGAGCGTAAAAATTTATGGGCCTGACTCGGCCCATAAATTTTTAAAGAGAATTCTGATTTAAAAGAAGA
AGAAAATCAGCCCGATAATGAGAACAATATCGGCAAGCAATGGGCAAAAAATCCCTTGCCAGAGAACCTTCTGCGGACGAAAGCCCACGCCGTGAATCAC
ACCAGCACAGACGGCCCACATAAGCAATAAACCATGCCAGATTTCCAGTTCACTGGTCTTCGCGGCGAAACGTGATGGGTCCCAAAACATACATCCTGCT
AACAGAAGTGCCATCACGAAGGAAAGCGCCCGCAGGGGCGCTTGTCCATTACCGCATACAAGGTTGCGATAATCTTACTCATCAGATGTCTTCTTGACCG
GCTTTGCCTGATTCGACGTGCTCAAGCGCCAGCGCGGTGATTACCCCAAACGAACAGGCAAGAAGCGTTCCCAGAATCCATGCGAAATACCACATTTTTA
GCTCCTTACTTAGTACAGAGAGTGGGTGTTACGTTCAATATCTTCTTTGGTGATACGACCGAACATTTTCCAGTAACACCAGGCGGTGTAGAGCAGAATG
ATCGGTACCAGAACCACCGCAACCCAGGTCATGACGTTAAGCGTCAGCTGGCTGGAAGTTGCATCCCACATTGTCAGACTTGCGTTCATCATGGTGCTGG
ACGGCATCACAAACGGGAACATTGCGATACCGGCAGTCAGGATGATGCAGGCCAGCGTCAGGGAGGAGAACACAAACGCCCACGCGGCTTTATCCATACG
TGCAGTCAGGATGGTCAGCAGCGGCAGAACCACACCCAGTGCCGGAATAGCCCACAGAATTGGCGTGTTGTTGAAGTTAACCAGCCATGCACCAGCTTCA
CGAACCACTTCTTTATTCAGCGGGTTAGAGGCTGCGTAATGGTCCATTGTCGATTTCACGACATAACCATCGATACCGTACATCACCCATACGCCAGCCA
GTGCGAAGCAGACCAGCGTCACCAGTGCCGCCACCTGAGCCGTTGCACGGGTACGCAGGTGCAGTTCGCCCACGGTACGCATTTGCAGATAGGTTGCGCC
CTGAGTAATGATCATCCCTACGCTCACCACACCTGCCAGCAGGCCGAACGGGTTAAGCAGCTGGAAGAAGTTACCGGTGTAGTACAGACGCAGATATTCA
TCAACGTTGAATGGTACGCCCTGCAACAGGTTACCGAACGCTACACCAATCACCAGCGGCGGAACGAAGCTACCAATGAAGATGCCCCAGTCCCACATGT
TACGCCAGCGGGTTTCTTCAATCTTGGAGCGGTAGTCAAAACCGACCGGACGGAAGAACAAAGACGCCAGCACGAGGATCATCGCCACATAGAAGCCGGA
GAACGCAGCGGCATAGACCATCGGCCAGGCAGCAAAGAGTGCGCCGCCCGCGGTGATCAGCCAAACCTGGTTACCGTCCCAGTGTGGTGCAATGGAGTTA
ATCATAATTCGACGCTCGGTGTCGTTACGACCGAGGAAACGGGTGAGCATGCCCACCCCCATGTCGAAACCGTCAGTGACTGCAAAACCAATCAGCAGAA
CGCCAACCAGCAGCCACCAGATAAAACGCAATACTTCATAATCGATCATTTGACGACTCCTGTCTTAGCGTGCCGGCTGAGTAGTCGTGGAAGACTGCTC
AAAGTGATAGCGACCGGTTTTCAGGCTGCTTGGGCCGAGGCGTGCAAACTTGAACATTAAGAACAATTCTGCCACCAGGAACAGGGTATACAGGCCGCAA
ATCAGCACCATTGAGAAGATGAGATCGCCTGCGGTCAGTGACGAGTTCGCCACAGCTGTCGGCAGCACTTCACCGATAGCCCACGGTTGGCGGCCATATT
CAGCCACGAACCAGCCCGCTTCTACAGCAATCCACGGCAGCGGAATACCGTACAGCGCGGCGCGCAGCAGCCATTTTTTCTCGCCAATGCGGTTGCGGAT
GACACTCCAGAAAGAGAGCGCGATGATTGCCAGCAGCAGGAAGCCACACGCCACCATAATACGGAACGCGAAGTACAGCGGCGCTACACGCGGAATGGAG
TCTTTGGTTGCCTGTTGAATCTGCGCTTCAGTCGCATCAGCCACGTTTGGCGTATAGCGTTTCAGCAGCAGACCGTAACCGAGGTCTTTCTTCATGCTAT
TGAACTGGTCACGAACCGCCTGGTCGGTAGAACCAGAACGCAGTTGCTCGAGCAGAGAGTACGCCTTCATCCCGTTACGAATGCGTTCTTCATGCTGCAC
CATCAGTTCTTTCAGGCCGATAACTGGAGTATCCACGGAACGCGTTGCAATGATGCCCAGCGCGTAAGGGATCTGGATCGCAAATTTGTTCGTCTCCTCT
TCCTGATCAGGAATGCCGAACAGAGTAAAGGCAGCAGGCGCAGGTTGCGTTTCCCACTCGGCTTCAATAGCAGCCAGTTTGGTTTTCTGCACGTCGCCCA
TTTCGTAACCAGATTCATCACCCAGAACAATAACAGACAGAACGGCAGCCATACCGAAGCTGGCAGCGATAGCAAAGGAGCGTTTAGCGAAGGCGAAGTC
ACGACCTTTCAGCATATACCATGCGCTGATACCGAGGATGAACATCGCGCCAGTCACATAACCAGACGCTACAGTGTGAACGAATTTCACCTGAGCAACC
GGGTTAAGCACCAGCTCGGAGAAGCTCACCATCTCCATACGCATAGTTTCAAAGTTGAAATCGGACGCGATTGGGTTTTGCATCCAGCCGTTCGCAACCA
GAATCCACAGTGCGGACAGGTTTGAACCGAGCGCCACCAGCCAGGTGACACACATATGCTGAACTTTACCCAGACGATCCCAACCGAAGAAGAACAGACC
TACAAAGGTGGATTCGAGGAAGAAGGCCATCAGACCTTCGATTGCCAGCGGCGCACCGAAGATATCCCCTACATAGTGGGAATAGTAAGACCAGTTAGTC
CCGAACTGGAACTCCATGGTCAGACCGGTAGCCACACCCAGAGCGAAGTTGATACCAAACAACTTGCCCCAGAACTTGGTCATATCTTTATAAATCTGTT
TGCCGGAAAGGACGTAGACCGTTTCCATAATGGCCAGCAGGAACGCCATACCGAGCGTCAGTGGCACAAAAAGGAAGTGGTACATCGCGGTCAAGGCAAA
CTGTAAGCGCGACAGTTCGACTATATCTAACATCATGACTCCTTGCTCATCGCATGAAGACTCCGAGAGTGAACCCCGTTAGAAAGGGTCACACGCATGC
CCCAATACAAAATTATTTGCTCGCCTCTATCGTTGCCATTTCATCAAAAGAGGAAAAGACAATGATAAAAAAGTTACAAATATGTTAATGAATAAACCAA
ATTGATCCCGTAATTATATTACGCCGCAAAATCCTTACAATAAACAGGTTTTTATTGAGCAAATTTGCATTTTTCGACAGTGATCAATTTATAGCGAAAT
TGTCACGATCTCACCAATTTGATCTACGACAATTTATCGTGTTTTGCAGATTTTTTCAAGAATTAAAAATTGATTTATATCAAAACCAACCAAATATGTT
AATTATGTATAAACCATAGATCATTGGTGATTTTATTGTTAATTTATTGTGAAATATTTATGCAACACAATTATTACAATGAAAAGGTATAGATAAAAAA
CCAGTGTTTTATTTAACAGAACCGCCTTATCCACTTTTTATAATACCAATTGATTAGATTAGCCAATTTGTTGCTATTTTACATAACATATTTTTATCAA
AGTTAATTGATTGTTGCCTTTATGAGCACCGGCCGTAAGCCCGTTATGTTATTGTTTCATTAGTAATAATCACTTAAATGTATCGATGAAACAGGTATGA
CTTAGCGGGAGTGATTGTTTCTGAGTGAACAGAGACCACTTTCGCCTGATAAATGAAAAATGAGCGATTTTTGCAAGTTAGTTTTTCTATAGCCGAGTAC
GCTCAGCGCCTCGCTTGATTACAATGAGGTTGCTGCTATGAGTCCTGATAATATCGGTTCGGCTGTCAATCGCTTCTCAGGTTGGCCATCTAATGATCCT
CTAAAAACAGATAACGAATCAATGACATCACCCGTGACTGTGCAGGTAATAAAGATGATTGCCGCCATCCTTGACCCATATCGGATAGTCGTTGGAATCG
ATACACTTTATACAACGCAGCGCGAAACATTTACCTCAGAGAGTCAACAGCTCATTGAATCAGCATTGCAAACACTTCATGTGATAAATTTAAATAACCT
GGAAACAAATCTCGATGAGGACGGTCACTATCTGGCTTTTGGATATAACGTTGACACTCCTGACAGAATAACCGTTTCTGCTTATAATGAAAAAAGCCTG
ACTGCTATGGCCAATGTCTTTTAATACAGGATGACGAAACAGACTTATTTAACCTGATAAAAGTTAAAATTTTTGAAGCCAGGCATAATTATGTCGCTCA
ATTGATGAGCGATCCGGAATTTATGTTCAAATTTAGTTATAGCGCTCAACAAAATAGATTAGAACCTCATCTTCTGGTTCCCACTTATTTCCCTCTAAAA
ACAAACGAACCGGTTACGCAAGAGGATGTACTGTTACTTTATCGTTTCTTTAAAATGGATGGTGATTTTAATATATTAACATCAGATGAATACATGAGTA
TCATGACACCTCTGATGAAGTGTGAGCGCAGCATCCACGACCACAACAGGTATGTGACGGGCAAAGATACCCTTCTTCTGGACTATCCTCCTTCTGGTAA
CCAGATATATTTCCATATTTTTCCTGACGAATCAGCAACACTAGTCCTTTATTTTTCAAACAATGACATTGAATGTTTCGTCTTTGAAAGAGATATTCCG
AGCCAGTATCGCTTTTTCAAAATGTTTACCAATCTGGCACTGGTTATTGATCAGTTAACCGATGCCAATCAAATACTTTAATTTTTATATATTCCCTGTG
GCAAATATTGCTAAACAATGCCCGGGGATTAATTTTTATTACTCACGGAAAGATTTAAATAATGATCCCATCTCAAATCTCTTTCAACACCCTTCCTGTC
AATGCAACATACGCTTCAGAGACAACAGTTGACACACAAAAATTCTCTGACATCCTCTACTCAGCGGGGTGTTCCCTAAAGGAACTGGCTTATCTGAGCA
GATGTCTGGCATCAATTCATCCGACTATCGCCAAAAACATTTATGAAACAGAAAATCTCAGCGATCAAAAATTACTACATATTGATTGCCGTAGTACAAA
TGAAATCAAGATAAATATCTTTTTTGGTCAACAACGAGAAGGATTAATTGAAATTAATTCTGACACTGTCATTTTTTCGATATTGTCTTCATTAATTGAC
TCCGCCATTTCTAAATTTCAACACCAAATCCCCGTTAACGGTTCAGTTAATCGTGAACTATTGTATGAGGATTATACTGATTAAATCCACCCAGTCGCGA
AAATGGCCTGCGTTATTGCCAGAGGTAATAAAACCTTTGATTAACGTTACTCATACTGGTAGCACCTTCATGTACCTCTCTTTTTTACGAAAAATCAAAA
GAGCTAACTAAGGTCATAATTCGCATGAATCATTAACCATTTGTTATTTTCAACATTATTTTTACATTAAGCAGAGATGAATTGCAGTGAAATTCGACTT
AAATTTTATGAAATGCATTTACTCATGGCTAAACCCATATCACTAAAATGCAAATTAGAAGTAGATCACAAATACCTCAATACACCAAATCAAGTTAATT
TTAAAAATTTAACATTCATGACATTAGTTGACATAACACACTGAATTAACATGAGAATTTAACAACATACTTTAAACAATCATTTCCCGAAAGACATTTT
GAAAATAGATCAATTGCAACATTACGGTCAGATAAAGACACTCCTGTGATATTAAACCTGTGCCGTTATGAACGGCCATAAATACGACGTGTGTAACTTA
TTTTACTCTCTGTCTTACAAAGGATTACCCATGAAGAAAGCAACACTTGTGATTGGCGTTATTGGCGCGGACTGCCATGCAGTAGGCAATAAAGTTCTGG
ACCGCGTTTTTAGCAACCATGGCTTCAGAGTCATTAATCTGGGCGTAATGGTCAGCCAGGACGAATATATTGATGCGGCCATTGAAACTGGCGCTGACGC
GATTGTCGTCTCCTCTATCTATGGGCATGGCGATATCGACTGTCTGGGCATGCGCGAACGCTGCATCGAGCGTGGACTGGGGGACATCCTGCTCTATGTG
GGCGGTAACCTGGTGGTCGGAAAACATGACTTCGCTGACGTGGAAACCAAATTCAAAGAGATGGGATTTGATCGCGTCTTTGCCCCAAGTCATGACTTAG
AAGATGTTTGTCAGCTGATGGCCCACGATATCAACCAACGTCATGACGTTGATACTCGTATTCTTGAAGAGGCAATCTGATGCAAATCGTCTCTGTCGAT
ATTGGATCGACGTGGACCAAAGCAGCCCTCTTCGCCCGGGCTGTCTCTTGATCAGATCTCCTGATCAAGAGACTTCATCACCAGGTAACCCTCAACCATA
TCCTGAAGTCTGAACCAGCCATCCCACATGACTACCCAACCGGGGCGACCGGTGCGTTTGCTGTCATGCCATCGCCCCAGTTTCGCCAGTTTCAGACAGG
CCCATTTCAGTGTCGGCATCTGTGACGGAAGCGGTTTTCCTTCCAGCTTAACCCACAGCAGTTTCCACTCTGTCGGCGTCAGTATTTTCTCACAGCTGTC
ATTTTGTGTTTCTTCACTGATACCGCCCTGCCGCAGGCCCAGCACCCGCACCGCGATAAACGCCTTGATAACCACCATGCGCTCGAGGTTATCCCGGGTC
TGCATTCGCAGCGATTCCACACATGTACCACCACTTTTCCACGCCTTGTGGTATTCCTCTATCAGCCAGCGTCGCTCGTAATGGCTGACGATACGTCGCG
CATCGGCGGCACTCGCCACTTTTTCTGACGTCAGCAGATGCCAGCAGGCGCCGTCCTCTGCCTGCTCCCGGCAACAGACATACGTGAGCGGGAGCGCCTG
GCCGCTGTTGTCGGGATTTTTTATGCTGACTTCGCTGTAACTGATGAACATCCGGGCCTGGCGGGCTGCCCGCCCGCCTTTTGCATCACATTCAGCGTGT
GGCTTCCCGCGGTTGCCAGGACTTCCGGCAGTTCGAAGAGCTTGCCGGGTGCTTCTTCCAGCCGGCGATTCTGTGCTGCACGCACCACGAAGCGCTGCCC
GTGGCTGACTTTATAATGCAGGTAATGCCAGATATCCGCTTCCCGGTCACAGACAGTGATTACCCGTTTCTGTATCTCCCCCAGCCGTTCGGCCATGCGC
TCCGAAGCCTGCTGCCAGCGGTAACTTTCTTTTTCTTCATAGGGACGTTCTTTTCGCTGGTGCTTAACACCGTAGGTGTCCGTGGCACGACTCCAGCGCT
GCTGTTCGATAAGACCGACTGGCAGGGCGCTGTCGGGGGCGTACATCAGGACAGAGTGAGCCAGCAGCCCGCGCGTCTTCGGGTTAGTGGTGGTATTCCC
CAGGTCATCAGATGCCGTACTGTGACTGAAGTTAATGGTGGTGGTGTCTTCCAGCGCGAGGAGCAGCGGATGAGCCTCACATGCCCTTACAGTGGCGGTA
AATCCGGCTTCGGCAATGGCTTGCGGGGACACAGACGGGTTACGTATCAGGCGGTACGCACCTTCAACCTGAGCAGTGGACTGGGATGATTTCACAATAG
AAAGACCTGCATGCTGAGCGAGAGAAGAGGCCAGTGACACAAGGCGTCGTGTACGACGCGGATCACCGAGACGGGCATGTCCAAACTGCTCGTTAGCCCA
TGAATAACAATCAGAAAGTACCATAACAGACCCGAAGAAAATGAAATATAAGAGAAGATCAACGGGTGAGGAAAAAGTTCAAAAAATCGCTGCCGGGGAG
GAAGGAAACTACCGGATGGAAAGAGTCCCCCTAAAGCAGACTGACAGACATCACAAATCCCCGGGTGGGGATTTGTGTATAAGAGACAGCTTCATTGGGG
GAATCGCCAGCAACACCACTAAATCAACCGCTTCCGGGCCATCCACGCCTTCCCACTGAAGCGGCTCGCTGAGTGTGGCGACCGCAAACGCCGCTTCTTT
TACCGCAGCAGTTTTGCCATGCGGCACAGCCAGCCCTTCACCTAAGGCGGTCGGGCCAAGGCTTTCACGGCAATACACTTCTTTCAGAAATTGCTCAGTA
CTGGAAATTTTCCCCAGAGCAGCAAGACGTTGAGTCAACGCGTGGATGGCCTCTTCACGGCTGGTAAAGCGCGCATTCAGACACAACGCATCGCGGTGGG
TCAGAGTCGTCAGATTCATCATGATCCTCACTTGATCGTTTTTATAGTCGCGCCAGTGTGCCCGATAAAACAACACCATTATGTGATCAATTTCACTTTA
TTGAAATTATTTGTATTGTATTTGTATTATTTGCAGGATGAATTTATCGGGCATAATGGCTAAATTCGTATTAATGAGATGCTAAATCATGGGACGGAAA
CCCTTATACCGACAGATTGCTGATCGCATTCGTGAGCAAATTGCGCGTGGCGAGCTTAAACCTGGCGATGCGTTACCCACTGAATCAGCGCTACAAACAG
AGTTTGGCGTCAGCCGGGTTACGGTGCGTCAGGCTTTGCGCCAGTTAGTTGAACAGCAGATCCTCGAAAGTATTCAGGGCAGCGGGACTTACGTAAAAGA
AGAGCGGGTCAATTACGATATTTTTCAGTTAACCAGTTTTGATGAAAAACTGACGGACCGTCACGTCGATACACACAGTGAAGTTCTGATATTCGAAGTG
ATTCCGGCTGACGATTTTCTTCAGCAACAGCTACAAATCACCCCACAGGATCGTGTGTGGCATGTGAAGCGCGTGCGCTATCGCAAGCAAAAGCCAATGG
CGCTGGAAGAAACCTGGATGCCGCTTGCGTTGTTCCCGGATCTCACCTGGCAGGTCATGGAAAATTCGAAATATCACTTTATTGAAGAAGTGAAGAAAAT
GGTTATCGATCGTAGCGAACAGGAAATCATTCCTCTGATGCCAACCGAAGAAATGAGCCGTCTGCTTAATATCAGCCAGACTAAGCCGATTCTTGAAAAA
GTATCGCGTGGATATTTAGTTGATGGCCGGGTGTTTGAATATAGCCGCAACGCTTTTAATACCGATGACTATAAATTTACCCTGATAGCGCAGCGAAAAT
CATCGCGATAAGCATAAAAAAGGCCATCATATGATGGCCAACCATGTCGAAACCGACAGCCCTTCGCCATTCCTGTAGAGGGAAGCGGCGAGGGCTATTT
CTTATTACAGATATTTATTGCAGAACAGTTTTCAGTGCTTCACCGATATCCGCCAGGCTGCGAACGGTTTTCACGCCTGCGGCTTCCAGAGCTGCGAATT
TCTCATCCGCAGTCCCTTTACCACCGGCAATGATCGCACCTGCGTGACCCATACGTTTGCCTTTCGGCGCAGTCACACCAGCGATGTAACCCACAACTGG
CTTGGTAACGTGCTCCTTGATGTACGCCGCTGCTTCTTCTTCAGCGCTACCGCCGATCTCACCGATCATCACGATCGCTTCGGTCTGCGGATCTTTTTCG
AACATTTCGAGGATGTCGATAAAGTTAGAGCCAGGGATCGGGTCGCCGCCGATACCAACACAGGTCGACTGACCGAAACCGTAATCCGTGGTCTGTTTAA
CCGCTTCATAGGTCAGCGTACCGGAACGGGAAACGATACCCACTTTACCTGGTTTGTGAATGTGACCCGGCTGGATACCGATTTTGCATTCCCCGGGGTG
ATAACGCCTGGGCAGTTCGGGCCGATCATACGAACGCCTGCTTCATCCAGTTTCACTTTCACAATCAGCATATCCAGCGTCGGGATGCCTTCAGTGATGG
TGATAATCAGTTTGATGCCTGCATCGATAGCTTCCAGAATGGAGTCTTTGCAGAACGGTGCTGGTACGTAGATAACAGAGGCGGTAGCGCCAGTAGCAGC
AACAGCTTCACGCACGGTGTTGAACACCGGCAGGCCGAGGTGGGTAGTACCGCCTTTACCTGGGGTTACGCCGCCAACCATTTTAGTGCCGTATGCAATG
GCCTGTTCTGAGTGGAAAGTCCCCTGGCTACCGGTAAAGCCCTGGCAGATAACCTTGGTGTTTTTATCAATTAAAATGGACATTATTTCCCCTCCACTGC
GGCAACAACCTGCTGAGCTGCATCCGTCAGACCTTTTGCTGCAATAATATTCAGGCCGCTGTCAGCCAGTTTCTTCGCGCCAAGTTCGGCGTTGTTACCT
TCCAGACGTACCACGACCGGTACGTTAACACCCACTTCTGCTACCGCGCCGATGATACCGTCAGCGATCAGGTCGCAACGAACGATACCGCCGAAGATGT
TAACCAGAACGGCTTTCACTTTGTCGTCAGAGAGGATGATTTTGAACGCTTCGGTTACACGTTCTTTGGTTGCGCCGCCGCCAACGTCCAGGAAGTTAGC
CGGTTCGCCGCCGTGCAGTTTAACGATGTCCATCGTACCCATCGCCAGACCTGCGCCGTTAACCATACAACCGATGTTACCGTCCAGCGCAACGTAGTTC
AGTTCCCACTGTGCAGCTTGTGCTTCACGCGGATCTTCCTGCGACTGGTCACGCATTTCACGCAGATCAGGCTGGCGGAACAGTGCGTTGCCATCAGCAC
CCAGTTTGCCGTCGAGGCAAACCAGATCGCCCTGTTTGGTAATAACCAGCGGGTTGATTTCGATAAGCGCAAGGTCGCGCTCCAGGAAAATGGTCGCCAG
GCCCATGAAGATTTTGGTGAACTGCTGAACCAGTTTACCTTCCAGACCCAGTTTAAACGCCAGTTCGCGTCCCTGATACGGCATCGGGCCAGTCAGCGGA
TCAAGCGCAACTTTGTGGATCAGGTGCGGAGTTTCTTCCGCCACTTTTTCGATTTCCACGCCGCCTTCGGTGGAGGCCATAAAGACCACGCGACGGGAAC
TACGGTCAACAACGGCACCGAGATACAGCTCTTTAGCGATATCGGTCGCTGCTTCAACCAGAATCTGGTTAACCGGTTGGCCATTGGCATCTGTTTGATA
CGTTACCAGACGCTTGCCCAGCCAGTTTTCTGCAAAAGCACGGATGTCTTCTTTGCTGTTTACAACTTTCACACCGCCCGCTTTACCGCGGCCACCAGCG
TGAACCTGACATTTCACTACCCACGGACCGGCACCGATTTTTGAAGCGGCTTCTTCTGCTTCGCGCGGAGTAGTACAGGCATAACCCACCGGTGCTGGTA
AGCCATAGCGGGCAAAAAGTTGTTTTGCCTGATATTCATGTAAGTTCATGTGTTCTGTCCATCCTTCAGTAATCGTTATCTTTTAAACCGTAGACCGACA
CCCTATCCACGTCGGTCTACAGTGCAGGTGAAGCTTAAACTACTAAACGTCCAGCAGCAGACGCGTCGGATCTTCCAGCAACTCTTTGATCGTTACCAGG
AAGCCCACGGATTCGCGACCATCGATCAAACGGTGATCGTAGGACAGCGCCAGGTACATCATCGGCAGGATCTCAACCTGACCATTCACTGCCATCGGAC
GATCTTTGATAGCGTGCATACCCAGAATTGCGCTCTGCGGTGGGTTGATGATAGGCGTTGACATCAGGGAACCGAACACACCACCGTTGGTGATGGTGAA
GTTACCACCGGTCAGATCTTCAACCGTCAGCTTGCCGTCACGGCCTTTAACAGCCAGCTCTTTGATTTTCTTCTCGATGTCTGCCATGCCGAGGGTATCG
ACATCACGCAGAACCGGCGTCACCAGGCCGCGCGGCGTAGAAACCGCCATACTGACGTCGAAATAGTTGTGGTAGACCACATCATCACCGTCGATAGACG
CATTCACTTCCGGGTAACGTTTCAGGGCTTCAACCACCGCTTTCACGTAGAAGGACATAAAGCCCAGACGGATGCCGTGGCGTTTTTCAAACGCTTCACC
GTACTGCTTACGCAGATCCATAATCGGCTTCATGTTGACTTCGTTGAACGTGGTCAGCATGGCGGTGGAGTTTTTCGCTTCCAGCAGACGCTCTGCCACA
CGCTTACGCAGGCGAGTCATCGGCACACGTTTTTCGCTACGTGCAGCCAGGGCCGGTTGCGCCGCCGGAGCAGCCGCTGCCGGAGCAGACTCTTTCGCCG
GGGCTTTCGCCAGATGTTTTTCCACATCTTCACGGGTCAGACGACCACCCACACCCGTGCCTTTAATAGCGCTGGCGTCGAGGTTATGTTCAGCCAGCAG
GCGACGGATCGCCGGGCTTAACGCATCGTTGTTTTGCTCTTCCAGAGACGCCTGCTGGCGTTGCGCCGGAGTGGACGCTTTCTCTTCAGATTTCGCGCTG
GTTTCTTTACCCGCGCTGTTGCCTTCACGCAGGCGACCAAGGATCTGACGAGACGTTACCGTTGTACCTTCATCTTCCAGAACCGCATCCAGAATGCCGT
CTGCTGATGCCGGTACTTCCAGTACCACTTTGTCAGTTTCGATTTCTACCAGCACTTCATCACGTACGACTGCGTCGCCGGGTTTTTTATGCCAGGTTGC
GACGGTGGCATCGGCTACGGATTCAGGCAGGTCAGGGACCAGAATATCTACGCTACTCATTGTGTATCCTTTATTTATTCGACGTTCAGCGCGTCATTAA
CCAGATCTTGTTGCTGTTTCTGGTGAACGGACATATACCCTACCGCCGGAGAGGCGGAGGCTGGGCGGCCTGCATAACGCAGAGAAGCCCCAAACGGAAT
CACTTCACGGAAATGATGCTGGCTGCAGTACCATGCGCCCTGGTTGAGCGGCTCTTCCTGGCACCAGACAAAATCCTTGACGTGAGCAAACTGCTGCAAC
ACTTCCTGCATCGCTTTATGCGGGAACGGGTAGAGTTGCTCGATACGCACAATGGCGACATCGTGTTGATTGTTCTTACGACGTTGTTCCAGCAGGTCGT
AATAAACCTTACCAGAACACATCACTACGCGCTTCACGCCCTTCGGATCAAGCTCGTCGATTTCACCGATGGCTGGCAGGAAGGTGCCGTTCGCCAGTTC
TTCGAGGCTGGATACCGCCAGCGGATGACGCAGCAGGGATTTCGGCGACATCACGACCAGTGGACGACGCATCCCGCGCAACGCCTGACGACGCAGCATG
TGGTAAACCTGTGCCGGGGTAGAAGGTACGCAAACCTGCATGTTTTGCTCAGCACAAAGTTGCAGATAACGTTCCAGACGCGCGGAGGAGTGCTCCGGCC
CCTGCCCTTCGTAACCGTGCGGCAGCAACATCACCAAGCCACACATCCGGCCCCATTTCTGTTCGCCAGAGGAGATGAACTGGTCGATAACCACCTGTGC
ACCATTGGCGAAGTCACCGAACTGTGCTTCCCAGATGGTCAGGGTGCGTGGTTCTGCGGTGGCATAACCGTATTCAAACGCCAGTACGGCTTCTTCAGAC
AGTACAGAGTCCCAGACGCGGAACGCGCCCTGGCCGTTATGGATATGTTGCAGCGGCGTGTAAGTGGAACCGTTAGACTGGTTGTGGATCACCGCGTGGC
GGTGGAAGAAGGTACCGCGACCGGAGTCTTCACCCGACAGGCGAACCGGAATGCCTTCGTCAACCAACGTGGCGTAAGCGAGGTTTTCCGCGCCGCCCCA
GTCGAACAGTTTCTCACCGGCTGCCATCGCCTGGCGATCGCCATAAATTTTGGCAACGCGAGACTGCATTTCAACCGCTTCCGGCACCGTGCTGATGCGT
TTAGCCAGTTCCTGCAGGCGCTTCATCTCAACTTTGTTCGGGTACTCTTCGTCCCATTCGTGGTTGAGGTACGGCGACCAGGTGAAAGAGTGCATGTTCA
TCGGACGCCACTCTGCTACAACGCAATCGCCAGCATCCAGCGCATCGCGGTACACGTTAACCATCTCGGTGGCATCTTCCAGCGTCGCAACTTTTTCCTG
CTCCAGCTTGTCAGCGTAGATTTTGCGCGGCGTCGGATGTTTTTTGATTTTCTGATACATCAGCGGCTGGGTTGCGCTCGGCTCGTCGGCTTCGTTGTGG
CCGTGACGGCGGTAGCATACCAGGTCGATGAAGACATCACGTTTAAAGGTGTTACGGAAATCGAGCGCCAGACGGGTAACAAAGGCAACGGCTTCCGGAT
CATCCGCATTAACGTGGAAAATCGGTGCCTGAACCATCTTACCGATATCAGTACAGTACGGCGTCGAACGGGCATCCAGCGGGTTAGAGGTGGTGAAGCC
AACCTGGTTGTTGATAACGATACGTACCGTACCGCCAACTTCATAACCACGCGCTTTCGACATGTTCAGGGTTTCCTGAACCACGCCCTGCCCGGTCACT
GCGGCGTCACCATGAATGGTGATTGGCAGCACTTTGTTGCTGCTCGGCTCATCGAGTCTGTCCAGACGGGCACGAACAGAACCGATAACGACCGGGCTTA
CAATCTCAAGGTGAGACGGGTTAAACGCCAGCGCCAGGTGCACCAGGCCGCCATCGGTCTGGAAGTCAGACGAGAAGCCCATGTGGTATTTCACGTCGCC
CGTGCCGAGGTGTTCTTTATGTTTACCGGCAAACTCGTCGAACAAGTCTTGCGGTTTTTTACCCAGCACGTTCACCAGCACGTTCAGACGACCACGGTGC
GCCATCCCGAGAACCACTTCGCGGGTGCCGCTGTTGCCAGCGTGGCGGATCATCTCTTTAAGCATCGGGATTAACGCGTCACCGCCTTCCAGCGAGAAGC
GTTTTGCGCCAGGAATTTTGCGCCGAGGTAACGTTCAAGGCCTTCAGCGGCGGTCAGTTCGCTTAAGAAGCGTTTTTTCTCTTCGCTATTGAAAGTCGCG
CGACCAGACTCGATACGCTGTTGGATCCAGCGTTTTTCTTCGGTGCTGGTGATGTGCATATACTCGGCACCAATCGGGCCGCAGTAGGTTTGCTTGAGGG
CTTCCAGCAGTTCGCCGAGTTTCATGGTCTCTTTGCCGCTGGCAAATGAACCGACGTTGAAGGTCTCCTGGAAGTCTGCTTCGGTCAGATCGTGGAAAGA
CGGATCCAGATCGGCCACTTTATCTTGCTGCCACAGTCCCAGCGGATCGAGATTCGCATGCTGGTGACCACGGAAGCGGTATGCGTTAATGAGCTGCAGG
ACTTTAACCTGCTTCACATTGGTGTCAGGGTCGGAGATCGTTGAAGAGTAACGTGAAGCGTCTTTCGCCAGGCGGCGGAAATATTCACGCGTTTGAGAGT
GGAATTGATCCGGTTTGACTCCCGTACCAGGTAACTGCTGGAACGTCGAACGCCAGTTAGCGTCAACCGAGTCAGGATCGGTTAAGAAGTCTTCATAGAG
CTGTTCTATCCAGCTCTGGTTTGCGCCAGAGAGGTAAGAAGAGTCCAACCAGACTTTCAAAGCGCTGTTCTGCATCGTGATCCCTTAAGCATCTTTTTTA
TGCTTACTTCGCCGTGGATACTACCACGCACATTTCATATCTGATGTGCGTGCCGGGGTTCACTTGTTGCGGACTTGTCGTGTTTTCTGCGTCCGCTAAG
GAACCTTTAAAAACTGTCTTAGTGTCAGGGGCAGTTTTTAAAGATTTCCTGCATTTCTTTGTTACGCCTGATGCGCTGCGCTTATCAGGCCTACGGGTAA
TGACTTGTAGGCCGGATAAGGCGTTTACGCCGCATCCGGCACTGTTTGCCTGATGCGACGCTTGCGCGTCTTATCAGGCCTACGGTTTACGCATTACGTT
GCAACAACATCGACTTGATATGGCCGATGGCGCGCGTCGGGTTCAGCCCCTTCGGACATACACTGACGCAGTTCATGATGCTGTGACAGCGGAATACACT
GAATGCATCGCTCAAACCGTCGAGGCGGCTGTCAGTCTCGGTATCACGGCTATCGATCAGGAAACGATATGCCGCTAGCAAGCCTGCCGGGCCGATAAAC
TTATCGGGATTCCACCAGAAAGACGGACAAGAGGTTGAACAACATGCGCAGAGAATACATTCATACAACCCGTCGAGTTTTTCGCGCTGCTCTGGCATCT
GTAAATGCTCGCGAGCTGGCGGATTTTGTCCATTATTCAACAGGTAAGGCTTAATTTTCTCATATTGCGCATAGAATTGTCCCATGTCTACCACCAAATC
GCGGATCACCGGTAAACCTGGCAGCGGGCGAATCACAATCTTCTTGCCCGGCTGGTTGAGTGCCGAAATCGGGGTAATACAGGCCAGACCATTCTTACCG
TTCATGTTCAGACCATCGGAACCGCACACACCTTCACGGCAGGAGCGGCGGAACGACAGGCTGGGATCTTTCTCTTTCAGCTGAATAAGCGCATCCAGCA
GCATCATGTCGCGACCTTCTTCCGCTTCCAGGGTGTAATCCTGCATACGCGGAGCATCATCAACATCCGGGTTATAGCGATAAATTGAAAACTCGAGTCT
CATTTTCCTGTCTCCGCATTAGTAAGTACGAATCTTCGGCGGGAATGCCGGGCGCAGTTTCGGTTCCATGTTGACGCTTCGGCGCGTCATGGATTCCGAC
TCTGGCAGATACAGGGAGTGGCACAGCCAGTTTTCATCATCGCGATCCGGGAAGTCGAAGCGGCTATGCGCGCCACGGCTTTCGGTACGGAAGTTGGCAG
AAACAGCCGTTGCATACGCCGTTTCCATCAGGTTATCCAGTTCCAGGCACTCAACGCGCTGGGTATTGAACTCACTGGAAGTGTCATCCAGACGGGCATT
TTTCAAACGCTCGCGGATAACTTTCAACTGCTCAAGCCCTTTCGCCATCGCATCACCTTCACGGAAGACCGAGAAGTTATGCTGCATACATTCTTGCAGT
GCTTTACGGATCGCCACCGGATCTTCACCGTTACGGTTACTGTTCCAGCGGTTCAGGCGATCCAGAGACGCTTCTACATCAGACTCGCTGGCATCGCGCA
GTGCGCCCTGCTCGGCGATGGATTCTTGCAGATGCAGACCTGCCGCTCGACCAAATACGACCAGGTCCAGCAGCGAGTTGCCGCCCAGACGGTTAGCGCC
GTGTACCGATACACAAGCGATTTCACCAACGGCAAACAGCCCCGGAACAACCACATCTTCGCCTTTCTCATTCACAGTCAGCGCCTGACCGGTCACTTTG
GTCGGAATACCGCCCATCATGTAGTGACAGGTTGGAATTACCGGAATCGGCTCTTTCACCGGATCAACGTGAGCGAAGGTGCGGGAGAGTTCCAGAATAC
CCGGCAGACGGGATTCGAGAACTTCTTTCCCCAGATGGTCAAGTTTCAGTTTTGCGTGTGGCCCCCACGGACCATCACAGCCGCGGCCTTCACGGATTTC
GATCATGATGGAACGCGCCACCACGTCACGGCCCGCCAGGTCTTTGGCGTTCGGCGCATAACGCTCCATAAAGCGTTCGCCATGTTTGTTCAGCAGATAA
CCGCCTTCACCACGGCAACCTTCGGTGACCAGTACGCCCGCACCGGCAATACCGGTCGGGTGGAACTGCCACATTTCCATATCCTGTACCGGTACGCCTG
CACGGATAGCCATGCCGACACCGTCGCCAGTGTTAATGTGGGCGTTGGTGGTGGACTGATAAATACGCCCTGCCCCGCCAGTCGCCAGCACTGTCGCGCG
AGCTTTAAAGTAAACCACTTCACCAGTTTCGATGCACAGTGCGGTACAACCGACCACTGCGCCATCCTGGTTTTTCACCAGATCCAACGCATACCACTCG
GAGAAAATAGTGGTGTGGTTTTTCAGGTTCTGCTGATAAAGCGTGTGCAGCAGTGCGTGACCGGTACGGTCGGCAGCCGCAGCAGTACGTGCCGCCTGCT
CGCCGCCGAAGTTTTTCGACTGGCCGCCAAACGGACGTTGATAGATACGACCATCATCAAGACGCGAGAACGGCAGGCCCATATGTTCCAGTTCCAGAAT
CGCTTCCGGCCCGGTTTTACACATATATTCAATCGCGTCCTGGTCACCGATATAGTCCGACCCTTTTACGGTGTCGTACATATGCCATTCCCAGTTATCT
TCATGGGTATTACCCAGCGCAACGGTAATACCACCTTGCGCAGAAACGGTATGGGAACGGGTCGGGAAGACTTTAGAGAGCAGCGCACAGGTCTGGCCAC
TCTGGGAAATTTGCAGCGCCGCGCGCATACCTGCGCCGCCAGCACCAATCACAACTGCATCAAATTCTCTGACTGGCAATTTCATCACACACCCCACACC
ACAACGAATCCATAAATCACGTAAACCACCAGTGCAACGACAATCACCAGTTGCAGCATCAGGCGCAAGGCCAGCGGTTTAACGTAGTCGGTCAACACCT
GCCACATGCCGATCCAGGCATGGATCAAGATAGAAAACAGCGCCAGCAGGGTGAACACTTTGGTGAACGCAGAGGCGAAGAAACCAATCCAGACTTCATA
TGTCAGTTCGCCACTGGTAGCGAAAAAACCGACCATATAAATGATGTAGAGCGTCAGGACGATAGCGGTAGCACGAACGAGGATGAAATCATGTACGCCA
TTGCGTCCTAATGCGGAGGCGTTGCTTACCATACGAGGACTCCTGCGAGAAGTGAAAACACGACAGTAATAACAAAGGAGATTTTGGCGGAGCGTTTACC
CGCTTCGAATGTTTCTTCCAGATAGCCAAAATCCATCATCATGTGGCGAATACCTACGACGACGTGATATGCCAGAGCGGTAAGGATGCCCCACATGATA
AATTTGACGAAGAAGCTGCCCATAATCGCGGAAGCTTGCTCGAAACCTTCAGGGGAAGAGAGGCTGGTACCCAGAAGCCACAGCAGGATGCCCACTGCAA
CAAAGGTGATCACACCGGAAACGCGATGGAGAATGGACGCTATCGCCGTGACGGGGAACCGGATGGTCTGTAGGTCCAGATTAACAGGTCTTTGTTTTTT
CACATTTCTTATCATGAATAACGCCCACATGCTGTTCTTATTATTCCCTGGGGACTACGGGCACAGAGGTTAACTTTCTGTTACCAGGAGACGTCGGGAT
TTCCTTCCTCCGGTCTGCTTGCGGGTCAGACAGCGTCCTTTCTATAACTGCGCGTCATGCAAAACACTGCTTCCAGATGCGAAAACGACACGTTACAACG
CTGGGTGGCTCGGGATTGCAGGGTGTTCCGGAGACCTGGCGGCAGTATAGGCTGTTCACAAAATCATTACAATTAACCTACATATAGTTTGTCGGTTTTT
ATCCCGAACAGTGATCTGCGTCACGATAACAACATTTATTTAATTTTTAATCATCTAATTTGACAATCATTCAACAAAGTTGTTACAAACATTACCAGGA
AAAGCATATAATGCGTAAAAGTTATGAAGTCGGTATTTCACCTAAGATTAACTTATGTAACAGTGTGGAAGTATTGACCAATTCATTCGGGACAGTTATT
AGTGGTAGACAAGTTTAATAATTCGGATTGCTAAGTACTTGATTCGCCATTTATTCGTCATCAATAAATCCTTTACCTGCAAGCGCCCAGAGCTCTGTAC
CCAGGTTTTCCCTCTTTCACAGAGCGGCGAGCCAAATAACAAACGGGTAAAGCCAGGTTGATGTGCGAAGGCAAATTTAAGTTCCGGCAGTCTTACGCAA
TAAGGCGCTAAGGAGACCTTAAATGGCTGATACAAAAGCAAAACTCACCCTCAACGGGGACACAGCTGTTGAACTGGATGTGCTGAAAGGCACGCTGGGT
CAAGATGTTATTGATATCCGTACTCTCGGTTCAAAAGGTGTGTTCACCTTTGACCCAGGCTTCACTTCAACCGCATCCTGCGAATCTAAAATTACTTTTA
TTGATGGTGATGAAGGTATTTTGCTGCACCGCGGTTTCCCGATCGATCAGCTGGCGACCGATTCTAACTACCTGGAAGTTTGTTACATCCTGCTGAATGG
TGAAAAACCGACTCAGGAACAGTATGACGAATTTAAAACTACGGTGACCCGCCATACTATGATCCACGAGCAGATTACCCGTCTGTTCCATGCTTTCCGT
CGCGACTCGCATCCAATGGCAGTCATGTGTGGTATTACCGGCGCGCTGGCAGCGTTCTATCACGACTCGCTGGATGTTAACAATCCTCGTCATCGTGAAA
TTGCCGCGTTCCGCCTGCTGTCAAAAATGCCGACCATGGCCGCGATGTGTTACAAGTATTCCATTGGTCAGCCATTTGTTTACCCGCGCAACGATCTCTC
CTACGCCGGTAACTTCCTGAATATGATGTTCTCCACGCCGTGCGAACCGTATGAAGTTAATCCGATTCTGGAACGTGCTATGGACCGTATTCTGATCCTG
CACGCTGACCATGAACAGAACGCCTCCACCTCCACCGTGCGTACCGCTGGCTCTTCGGGTGCGAACCCGTTTGCCTGTATCGCAGCAGGTATTGCTTCAC
TGTGGGGACCTGCGCACGGTGGTGCTAACGAAGCGGCGCTGAAAATGCTGGAAGAAATCAGCTCCGTTAAACACATTCCGGAATTTGTTCGTCGTGCGAA
AGACAAAAATGATTCTTTCCGCCTGATGGGCTTCGGTCATCGCGTGTACAAAAACTACGACCCGCGCGCCACCGTAATGCGTGAAACCTGCCATGAAGTG
CTGAAAGAGCTGGGCACCAAAGATGACCTGCTGGAAGTGGCTATGGAGCTGGAAAACATCGCGCTGAACGACCCGTACTTTATCGAGAAAAACTGTACCC
GAACGTCGATTTCTACTCTGGTATCATCCTGAAAGCGATGGGTATTCCGTCTTCTATGTTCACCGTGATCTTCGCTATGGCACGTACGGTTGGCTGGATC
GCCCACTGGAGCGAAATGCACAGTGACGGTATGAAGATTGCCCGTCCGCGTCAGCTGTATACAGGATATGAAAAACGCGACTTTAAAAGCGATATCAAGC
GTTAATGGTTGATTGCTAAGCCGTTCACTTTCCGGACCCGCCTTTAATAGAGCGGGTTCTTTTTATATGGCTGAACATAAAAAATTGTAAAAATTAAACC
AGATGCAAATACCCATTAATAATGGTGAAAAAATATTTCACCGGAAACACTGGTGATTGATTTGGGTAAATTTAACTTACTGGATATTCGCCGCCACACA
ATGTCGAAAACATTCAGTATCAAGACAACAAAATCGCAAAATGACCAGTGTACCGACGGATTTAAGGTCAGCTCCTCGTTTTATACCGAAAAAACGTTGG
TTGAAGAAGATAAAGCATTGTTGATTGGTAATGGTCTGAAGCTACGTATACTGGATGAAAACGCCTCGCCTTATACATTCAATAAATATGCTTAATACGC
CGATTTCACCAGTGATATGCTGATCTACGAAAAAATCTATACGGCTGAATTATCGTCCACACCTGGCACTCCCATCGCGGTGGGTCCCTTCGATACAGTG
GTACTTTTTAAGATTAACTATAACTGATTTAACACGACGCCCTTTTCAGCCGGAAAGGGCAACGTATTCAGATTATTGCTGATTTTCCCCTTTTCCTTGA
TTACCGTTATTTTTTCCAGACCCAGCTTTCTTTATGCTGTATCGATACACCAAAGATAAAATAATGAGGAAGCGAAGAATGCCTGTATTGCAGTGGGGAA
TGTTATGTGTTCTGTCACTTCTCCTTTCTATTGGCTTCCTCGCTTTACATCTCCCGGCGGCACTCCTGCTTGGCCCGATGATCGCGGGGATCATCTTCAG
TATGCGCGGAGTCACTCTGCAACTTCCCCGCTCCGCTTTTCTCGCTGCCCAAGCCATTCTTGGCTGCATGATTGCACAAAACCTCACTGGTTCGATTCTC
ACCACGCTGGCCGTCAACTGGCCGATCGTGCTTGCGATTTTACTGGTGACGCTGCTTTCCAGCGCCATCGTGGGTTGGTTATTGGTGCGCTATAGCTCAC
TGCCTGGAAATACCGGTGCCTGGGGTTCTTCTCCTGGCGGCGCGGCGGCAATGGTCGCTATGGCGCAAGATTACGGCGCAGATATTCGCCTGGTGGCGTT
TATGCAATATCTGCGAGTGCTGTTCGTCGCGGGGGCCGCTGTTCTGGTCACCCGCATGATGCTGGGCGATAACGCTGAAGCGGTTAACCAGCAGATCGTC
TGGTTCCCGCCAGTGAGCATTAATCTCCTGCTTACGATTTTGCTCGCGGTCGTTGCCGGTACGGCGGGATGCTTGCTACGTCTTCCTTCCGGCACGATGC
TCATCCCGATGCTGGCGGGCGCAGTGCTCCAGTCTGGTCAGCTCATCACCATCGAACTCCCGGAATGGCTGCTGGCGATGGCATATATGGCAATTGGCTG
GCGGATTGGTCTTGGTTTCGATAAGCAAATATTACTGCGGGCATTGCGCCCGCTACCGCAAATCCTGCTGTCGATTTTTGCTCTGCTGGCTATTTGTGCG
GGTATGGCGTGGGGGCTGACCCGGTTTATGCATATTGATTTTATGACCGCCTACCTCGCCACCAGCCCCGGCGGGCTTGATACCGTGGCGGTCATCGCCG
CAGGGAGCAATGCCGATATGGCGCTCATAATGGCGATGCAAACCCTGCGCCTGTTCAGTATTTTGCTGACGGGGCCTGCCATCGCACGGTTTATTTCAAC
CTATGCGCCGAAGCGTTCGGCCTAGTGCTGGCAGCCAGGGCACCAGTAAAACGGGCGCGATGACAGCGTGGTTTTCTCAATGATGCCGCCACAGCGTTCG
CACGGTTCGCCATCACGATGAAAAACCTTAAAGCGAAACAGCGCCCCATGATATTTGTTTTCATCCACCTGGCCCCGCGTAGCGTAAGAAAGTCGCGGAA
TATCCAGTAACGCGTGTGCGAGTGCATCCAGTTGCGCCGCATTGAGATCTTTCGCTTTATGATTTCCGGTCAACCCAACCTGCCAGAGGATCTCCACCCG
CAAATAATTGCCAAGTCCTGCCAGAAACGCCTGATCGAGCAGTAATCCAGCAAACTGACGGTTACGAAAGCGCGGCGACAATAATCGTTCCTTTACCACC
TCCGGCGTCAGATTCGGATCCAGCACATCGTGACCAACGCGTTGTAAAAACGGATGCGTGGTCAATTGTTCCGGGGTCAACATCTCAATATCCGAGGCGC
TATAAAGCAGAATGGTTTTGTCAGCCGTTTGCAGTTTTACCCGCAGTACTCGCGTGGTCTGCGGCTCTTCGCCGGTATCAACCACGCGCCAGACGCCGTA
AAGCTGATTATGGCTGTAGAGCGTTAAGTCGTTGGAAAAATGAGTTAACAACGCCTTACCACGCGTTTCCACATGGGTAACGTGTTGACCGATAAGTCGT
GATTGATAAGATTTTAACTGCGGGAAGGCAAACCAGACATCAGTTAGTGGTTTGCCTTTGATCGCCGCCTCCAGGTTATCCGCTGCACGGCGGATCTCCG
GGCCTTCAGGCATGGTGATATCCTTTTTCATTCTTTATTAAGCGGGGTTATGCTGCGACAACAATCCCCTTTTCAGCAAATGTAGCTCGTAATCGGCGGG
CGAACGCCAGTGCGTGCTCGCCATCGCCATGTAGGCAGACCGTTTGCGCCGTGACCATTGCCCATTCGCCGGTGATACTTTTGACTCTGCCGTATTGCAC
CATCTCCAACGTTTGCGCCAGCGCCTGTTCTTCGTTTTCAATCAACGCGCCTGGCTGGCTTCGCGGCACCAGCGAACCGTCTGCCTGATAACCGCGATCG
GCAAACACTTCCTCGCGCGTTACCAGGCCATATCGTTCGCCTGCACGAATCAGCTCGCTTCCTGCCAGCCCGACGAGAATCAATGCCGGATCGCAAGCGT
ATACCGCTCTGGCGATGGCGTCTGCCAGTTGTGCCTCTTTCGCCGCCTGGTTGTATAACATGCCGTGCGGTTTGACATGACACATTACGCCGCCTTGCGC
ACGGGTAATCGCTGCCAGCGCGCCAATTTGATACAGCGTCTGGGCGAAAACGGTTTCTGGCGGCAGCTGCATGGCGCTGCGACCAAAATTTTCCCTGTCG
GGAAAACTCGGGTGCGCGCCAATCGCGACACCGTTTTTTATTGCTTCACGCACGCAAGCCTGCATGGTTTGCGCATCGCCTGCATGAAATCCACAGGCAA
TATTGGCAGAGGAAACCAGCGTTAATAGCTCTGCGTCGCTGGCGCAGCCTTCGCCCAGATCGGCGTTCAGGTCAATTTTCATTGTGCAGCCGCCACGCTA
ATTGTTCGAAATAACGTTGTTGATCTTGCCGTGCTTTCAGTGCCTCTTCCAGTGAACACTGGACAAAATGAATCGGCTGACCGAGCGGAATTTGCGCCAG
ATGGTACATATCAGCCTCAATGATACAGGCAATACGCGGGTAACCACCGGTGGTTTGCGCATCGTTCATCAACACAATGGGCTGCCCGTTATGCGGCACC
TGCACCACACCTGGTAACAAACCGTGAGATAACAGTTCGCGATCGGTGGTGCGTTTTAAAATTTGCCCCTGTAAGCGATAGCCCATCCGGTTACTTTGCG
AGCTAAGCTGCCAGGGCGAACGCCAGAATGCATCCTGCGAGGCGCGATCGAACTCATGATATTCCGGCCCCGGCAAGGCGCGAATGCGGTTGCCCCACAG
CAGCTGTTTAACGCCCTGCGCTTCCATAAAATCACGCTTCGCTTTGCCAATCGGGAGTCGGTCACCATCCCTCAGTAAACGGCCTTCCAACCCGCCAATC
CCCACTTTGAGATCGGTGCTGCATGATCCCATTACCGGCGGAACATCAATACCACCCGCGACCGCCAGATAACTGCGCATCCCGTGCTGCGGGCGTTTAA
GCGTTAAACGCTGGCCTGCTCTCATTGGCAATCGCCAGCCGGTCCAGACGGCGTTATCATCCAGCCGCGCTTCGCAACCAGCCCCCGTCAGGGCAAACCA
CCCATCAGTTTCGAACTCAACCGTTAACTGACCGAGCGTGATCTCCAGCGCGGGGGCGTTGGCGTCATTACCCACCAGCAGGTTAGCAATGCGCAGCGCA
GGCATATCCAGTGCGCCGCAGTGGCTGATACCCGACTGGCGAAAACCGTGACGACTGCCATCCTGCACAGTGGTATACATGCCCGCACGAATAATCTTCA
GCATACTCCCTCCTTCTGGGGTACAAAGCGCACGCTGTCTCCCGGACGTAATAAGATGGGTTCGTCACACGCCGGATCAAACAGGCTGAGTGAGGTATGA
CCAATCAACTGCCAGCCACCCGGCGTTGCCAGCGGATAAACACCGGTCTGCGGCCCGCCGATCCCGACAGAACCTGCCGGAACGTGCAAGCGCGGTTCAG
CGCGCCGTGGCGTGTGTAGTTGTTCCGGCAAACTCCCGAGATACGGGAAGCCCGGTTGAAAGCCTAAAAACCAGACCACGTATTCCACGGAGGAGTGCAA
TTCAACAACCTGTTTTTCGCTCAATCCACAATGCGCCGCGACCACCGCCAAATCCGGTCCGGCTGCGCCACCGTAAACTACCGGAATTTCAATAAAGCGA
GACTCCGGCTCCAGCGCCTCACTCTCCTCCCACCAGCGTTGCAAACGCTCTATGGCATCCAGCGCCAGCGACTCAGGATTACGCAAAATCACCGTGATAT
TGTTCATGCCAGGAATGGCTTCAACCACATTCGGCATATCCACCAGACGCTGTGCCAGTCGCCAGATCCGTTTCTGGCTGGCCAGCGTCACCGGCGGTTC
CAGTTCCAGTACTACCGCCGTTTCACCTATCAGATAACAACGCGCTCGTTGCACTTTCGATCCCTCTGATTATTCGTTATGCAGGATTAGGAATATCAAT
AAAGGTCACATCAAGATCGGTATTTTCATTCAGCCACTCGCTCAATGCGCGAATACCACCGCGTTCAGTGGCATGGTGACCCGCAGCATAAAAATGCAAT
CCCTGCTCGCGGGCTGAATGAATGGTCTGTTCAGAAACTTCGCCAGTAATAAAAGCATCCACGCCAAAACGCGCGGCGCTATCGATAAAACTTTGCCCGC
CCCCGTGCACCAGGCGACGCGCTGAACCACCTCAGGCCCGGTATCGCCACACCATAACGGCTTACGTCCCAGACGCGCTTCAATCCAGGAGGCCAGTTCC
AGTCCCGGCACAGGCATGGTCAGTTCGCCCCACGGCACCAACGGCTCAATTTCGCCCATGACCGTGATCCCCAGTAACGCCGCCAGCTGTGCGTTATTGC
CCAGCTCAGGATGTGCGTCAAGCGGCAAATGCCAGCCATACAGGTTGATATCATTCGCCAGCAACGTTTTTAAACGGTTACGCTTCATTCCGCGAATGAC
CGGAGATTCACCTTTCCAGAAGTAGCCATGATGTACAATGACCGCATCCGCGCCCAAACGCACTGCCTCATCGAGCAAAGCCTGGCTGGCAGTGACACCG
GTAACAATTTTTTGCACTGTCTCTTTGCCTTCCACCTGCAAACCATTCGGCGCGTAATCACTAATCGCCGCGCTGTTCAGTTTTTCGTTAATCAGTTGTT
CCAGTTCGGTGTTTTTCATCTTCGCGCCTTCCGTATTCTGATAGCTACACCGTTAACATAGCGTTACCTCGCCTGTTCGTCGATAGCCAATCTTTTGACA
TATTAAGAAACAAACCCGACGCCAAAAGACGCAAATTGTTTATATCATCACGCTTCAGCTAATGTATATTTATGCAATCAGACAGCATATTGCATAAATA
ATCAGATCTGTATCAAAGTTTTAACTTTAAGGAAACACAAGCACGCCGCGCAACTATTACGTGACGTTGCAGTCAATTGTGGAATTATTATGAATAAACA
CGCATCACAACCGCGCGCTATTTACTATGTCGTTGCGCTGCAAATCTGGGAATATTTTAGCTTTTACGGCATGCGTGCCCTGCTGATCCTCTATCTCACC
AATCAACTAAAATATAGCGATAATCACGCCTACGAGTTATTTAGCGCCTACTGTTCGCTGGTATATGTCACGCCAATCCTCGGTGGCTTTTTGGCGGATA
AAGTTCTCGGCAATCGCATGGCGGTGATGCTGGGGGCGTTGTTGATGGCGATCGGTCATGTGGTGCTAGGTGCCAGTGAGATCCATCCGTCATTCCTCTA
TCTGTCACTGGCGATTATCGTCTGCGGCTATGGTCTGTTTAAATCCAACGTCAGTTGCCTGCTCGGCGAGCTGTATGAGCCAACCGATCCACGTCGTGAT
GGCGGTTTCTCGCTGATGTATGCAGCGGGTAACGTGGGGTCTATTATCGCACCTATCGCCTGTGGTTTCGCCCAGGAAGAGTACAGTTGGGCGATGGGCT
TTGGCCTGGCGGCGGTGGGTATGATCGCGGGTCTGGTCATTTTCTTATGTGGCAATCGTCATTTCACACATACCCGCGGCGTTAACAAAAGGTACTGCGT
GCGACAAACTTTCTCCTGCCCAACTGGGGATGGCTACTGGTTCTGCTGGTGGCAACGCCTGCGCTGATTACCGTGTTGTTCTGGAAAGAGTGGTCGGTAT
ACGCCTTGATTGTCGCGACGATCATTGGCCTTGGGGTTCTGGCAAAAATTTATCGCAAAGCAGAAAACCAAAAACAGCGTAAGGAGCTGGGGCTGATTGT
TACCCTCACCTTCTTCAGCATGTTGTTCTGGGCATTCGCACAACAGGGGGTAGCTCGATTAGCCTTTATATCGACCGCTTCGTTAACCGCGATATATTTG
GTTATACCGTTCCGACTGCTATGTTCCAGTCGATTAATGCCTTCGCAGTTATGCTGTGCGGTGTGTTCCTGGCGTGGGTGGTTAAAGAAAGCGTCGCAGG
TAATCGTACCGTGCGCATCTGGGGAAAATTTGCTCTTGGCCTTGGCCTGATGAGCGCCGGATTCTGCATTCTGACCTTAAGCGCCCGCTGGTCCGCAATG
TATGGTCACTCTTCTCTGCCACTGATGGTGTTAGGCCTGGCGGTGATGGGCTTTGCGGAACTGTTTATCGACCCGGTTGCTATGTCGCAGATTACGCGCA
TTGAAATCCCCGGCGTGACCGGCGTATTAACCGGCATTTATATGCTGCTTTCCGGCGCGATTGCGAACTATCTGGCGGGCGTGATTGCCGATCAGACATC
GCAGGCTTCGTTTGATGCTTCCGGGGCGATCAACTACTCCATCAATGCATATATTGAAGTATTTGATCAAATTACCTGGGGCGCACTGGCGTGTGTAGGA
CTGGTACTGATGATTTGGCTGTATCAGGCGCTTAAGTTCAGAAACCGCGCGCTGGCGCTGGAGTCTTAATAAGCCAGCACCATGCCTGATAAAACGCTCG
CTGCGTTTTATCAGGCTCCTTTCCTCGCTTCTTCGTACGCTGCCAGCGTTCGCAGCCTTGCCTCTTTGTGATCAACTATCGGTTGCGGATAATCCAGCGT
CACACCTGCTTTCTGCGCCCACTTCCACGGCTCATGCACCACTTTCCCTGGCACATCGCGCAGTTCCGGTAGCCACTGGCGGATAAACTCGCCCTCACGG
TCAAATTTCTCGCCCTGGGTTGTCGGGTTAAAAATACGAAAATACGGCGCTGCATCGGTTCCGGTTGAAGCGGCCCACTGCCAGCCACCGTTATTGGCTG
CCAAATCACCATCAATCAGCTGCGACATGAAATATCGCTCACCTTCGCGCCAGTCGATCAATAAATCTTTCACCAAAAAACTGGCTGTAATCATCCGTAG
CCGGTTATGCATCCAGCCGGTGCTGTTAAGCTGACGCATGGCAGCATCAACAATCGGGTATCCCGTTTTGCCTTCCTGCCAGGCCTTTAAATGCGCGGAA
TTGCTCTGCCACTGCACGCGGTCGGTCCAGACAATAAACGGACGATGTTTACACAGCGAGGGGTAATACGTTATCAGATGACGGTAAAACTCGCGCCAGA
TCAGCTCATTAAGCCAGATACTACCGGCCCCACCGTCCAGCGCCTGCGGCTGTTCCGCCAACAGGCGATGCAAACACTGGCGAGGCGATAACCCGCCCGT
TGCCAGGCTGGCGGACAAACGGCTGGTGCCTTCTACCGCAGGGAAATCTCGCTGTTGCTCATACTCTCCGGCACCGTTCTGGCAAAACTGGCGTAATTGC
GCAATCGCCGCTTTCTCTTCCACCGGGAAATGCGCAGTATCGAAAGGCTGACGAGGATAATTCAGCGTAATGGATGGCGCGGGATCTATCGATCCGCTAC
TACGTACTTTTGGCGCAGCGACGCACTCCGGCATCCCTTCTCGCAGCCGTTTAAGCCAGGCGTTTTTAAATGGCGTAAAGACTTTGTACATCTCATGATT
GCCAGTCATCACCGCCCCCGGCGGCAGGATCACGCCGTCGTCAAATCCTTCACACACCACGTTACGCAGCGCCCTCTCAGCCTGCACATCCCGCGCCCGC
TCATTCACCTCATACTGATAGTTATAAAACAGATGGGTAACACGATTTTCCGCGCACACCTGTTTAACTATTTCGACGCTGGCGGCAAAGTCATCCACTT
CGCGGAACAATAAAGGAATGCCTTTTTCCGCCAGCGCGTTTTGCAGCGCATTAAGTTGTGTATTGATAAGTTCAGCCTGACGCGGCGACACATTATGCAC
CGCCCACTGGCGTGGTGTAGCGATATACAACGCCAGCACGCGCGCAGACGAATTGCGGCAGGCGGCAGCCAGCGCGAGATTATCGTGCTGACGTAAATCC
TGGCGAAACCAGACCAGATGGGTAGTCATAAAACTCCTGCATGGCGCAAGTTAATCACACGCGGCCAAAGTTCGAAATAACGCTGCCCTGAAAGCCAGGC
GTCAGGATAAAGCGCCATATAGTGTTTGATACGCATCAGCGGCGCAAGAAGCGGTTGCTCGCCACGGCGATAACTGTCGATAAGCGCTGCCAGCTGCTGG
CGTTCTGTGGAATCAATATGTGGGCGAAAATATCCCTGAACGTGCATCAAAACGTTAGTATGATCACGCCGGTTGGCAGGGTGAGAAAGCAAAACAATTA
CGCGTTGGCGGTACTGGTTGTAATAGTCATCCAGACTTTGCCACCGGTGAATATCAGCCACAAACGGGCCAAGTTTGCGGTACTCCGGCTGAGAATGCGC
CAGAAAGACGAGTTTATAGCGGCTGTGATAATCGAGAAGCGCCCCGCGCGTTAGTCCTCGATCTTTGAGATTGTGTAACTCATGCAAAGCAAAAATGCGG
ATAAGGGTGCTGTCATCAAAAAGTTGTTGATTCATTACTGCTCCTGAACGGTTTACAGGAGTAAGTGTAGACGCCGAAAAAGAAAATCGCCAGCGTCTCC
GCTGGCGGTTTTCTTTGAACGTCATGTTTAGCAATCAATAAAAATCACCGGTTGCCTTTTCGGCCTGATCCATCCACACCGGTTTATCGCTGGTTTTCGA
CCAGACGCGGTGCAGGTAGCTATAAAAGCGGGCGCGGTCTTTCCAGAAAAGCATGAAAGGCAGCGCCAGAACGCCCGCTGCAACCGCACAAGTACGGCGT
AAAAAGATAAGCCATGCAGGATATTCTTTGTAGAGTTCCATACTTTTCTCCCCTTTTGTATCTACCCGGTGAATAGCACCGGAAAAATGAATTCGTTTAT
CTGATGAAAATAGTACCGCTGTTTGTGTAATTTTACTACTCATCCGACCACTTATTTTTGCTTATTGATGGTTTATTTACATTCACCGTGTAATTAAGTT
ACATAAAAGTTAAATTAATACTAAACATTAGTTAAACCATGGCTTTTGCCATTTTTATACTTTTTTACACCACGCCCGCAGATTTTTGCGAAATCTTTGC
AGCCAGAACTCTACCCTTCCGGTATCACTTTTAGGCCACTGGAGGTGCACTGTGAGTGCAGGCGTGATAACCGGCGTGTTGCTGGTGTTTTTATTACTGG
GTTATCTGGTTTATGCCCTGATCAATGCGGAGGCGTTCTGATGGCTGCGCAAGGGTTCTTACTGATTGCCACGTTTTTACTGGTATTAATGGTGCTGGCG
CGTCCCTTAGGTAGCGGGCTGGCGCGGCTGATTAATGATATACCTCTTCCTGGTACGACGGGCGTTGAACGCGTACTCTTTAGCACGCTTGGCGTCTCTG
ACCGCGAGATGAACTGGAAGCAGTATCTCTCAGCCATTCTTGGCCTGAATATACTGGGGCTGGCGGTGCTGTTTTTTATGTTGCTCGGTCAGCACTATCT
GCCGCTTAATCCACAGCAGTTGCCGGGGCTGTCGTGGGATCTGGCGCTCAATACCGCCGTCAGCTTTGTCACGAATACCAACTGGCAATCTTATAGCGGT
GAAACCACGTTGAGCTATTTCAGCCAGATGGCGGGCTTAACGGTGCAAAACTTTCTTTCTGCCGCCAGCGGGATTGCGGTGATTTTTGCGCTTATTCGCG
CGTTTACCCGCCAGAGCATGAACACGCTGGGTAATGCGTGGGTAGACCTGTTGCGGATTACGTTATGGGTGTTAACCCCGTAGCATTGCTGATCGCACTG
TTTTTTATACAACAAGGTGTGCTGCAAAACTTTTTGCCTTATCAGGCTGTGACGACCATTGAAGGAGCGCAACAGCTATTACCAATGGGGCCAGTAGCTT
CTCAGGAAGCGATCAAAATGCTCGGAACTAACGGCGGTGGCTTTTTTAATGCCAACTCGTCGCATCCGTTTGAAAACCCAACCGCACTGACCAACTTCGT
GCAAATGCTGGCGATCTTCTTGATCCCAACAGCGCTGTGCTTTGCCTTTGGTGAAGTGGCGGGCGATCGTCGCCAGGGGCGCATGTTGCTGTGGGCGATG
TCAGTGATTTTTGTCATCTGCGTAGGCGTAGTGATGTGGGCAGAAGTTCAGGGTAATCCTCATCTGCTGGCGCTCGGCGCGGACAGCAGCATCAATATGG
AAGGTAAAGAGAGCCGTTTCGGCGTGCTGGTCAGTAGCCTGTTTGCGGTCGTGACTACGGCGGCTTCCTGCGGCGCGGTGATTGCGATGCATGATTCGTT
TACCGCTCTTGGTGGCATGGTGCCGATGTGGTTGATGCAAATTGGTGAAGTGGTATTCGGCGGCGTCGGTTCAGGCCTTTACGGCATGATGCTGTTTGTC
CTGCTGGCGGTGTTTATTGCCGGGCTGATGATTGGTCGTACACCGGAATATCTGGGTAAAAAAATCGACGTACGCGAGATGAAACTGACTGCACTGGCGA
TTCTGGTCACCCCGACGCTGGTGCTGATGGGCGCGGCGCTGGCAATGATGACCGACGCCGGACGTAGCGCCATGCTCAACCCTGGCCCGCATGGTTTTAG
CGAAGTGCTGTATGCCGTGTCATCCGCCGCTAACAACAACGGCAGCGCCTTTGCCGGATTAAGCGCCAACTCTCCATTCTGGAACTGTTTACTGGCGTTG
TGCATGTTTGTCGGGCGCTTCGGGGTGATTATCCCGGTGATGGCAATTGCCGGTTCGCTGGTGAGTAAAAAGAGCCAACCCGCCAGCTCCGGCACATTGC
CAACGCACGGCCCGCTGTTTGTTGGCCTGTTAATCGGCACCGTGTTGCTGGTTGGCGCACTGACCTTTATCCCTGCCCTGGCGCTTGGTCCGGTGGCGGA
ATATCTCTCCTGATGATATTGAGTGAGCACTGAATATGAGTCGTAAACAACTGGCGCTATTCGAACCAACACTTGTCGTTCAGGCGCTGAAAGAAGCGGT
GAAAAAATTAAACCCGCAGGCGCAATGGCGCAATCCGGTGATGTTTATCGTCTGGATCGGCAGTCTGCTGACCACCTGTATTAGCATCGCGATGGCAAGC
GGTGTGATGCCTGGCAATGCGCTGTTTAGCGCGGCAATTAGCGGCTGGCTGTGGGTCACCGTACTGTTCGCTAATTTCGCCGAGGCGTTGGCAGAAGGCC
GCAGTAAAGCGCAGGCCAACAGTCTGAAAGGGGTGAAAAAACCGCTTTTGCTCGCAAGCTGCGCGAACCGAAATATGGCGCTGCGGCAGACAAAGTTCCT
GCCGATCAACTGCGTAAAGGCGATATCGTACTGGTAGAAGCTGGCGATATTATCCCCTGCGATGGTGAAGTCATTGAAGGCGGCGCATCGGTCGATGAAA
GCGCCATCACCGGGGAATCGGCTCCGGTGATCCGTGAATCCGGCGGTGATTTTGCCTCCGTCACTGGCGGCACGCGTATTCTTTCTGACTGGCTGGTGAT
TGAGTGCAGCGTTAACCCCGGCGAGACATTTCTGGATCGGATGATCGCGATGGTGGAAGGTGCGCAGCGACGTAAAACGCCGAACGAGATTGCCCTGACC
ATTCTCCTGATTGCCCTGACTATCGTCTTTTTACTGGCAACCGCCACGCTGTGGCCGTTTTCCGCGTGGGGCGGTAATGCAGTCAGCGTAACGGTACTGG
TGGCACTGCTGGTCTGTCTGATCCCAACCACTATTGGCGGCCTGTTGTCAGCGATTGGCGTCGCCGGGATGAGTCGGATGCTGGGCGCGAATGTGATTGC
CACCAGCGGGCGAGCAGTTGAAGCAGCGGGTGATGTTGACGTTCTGCTGCTGGATAAAACCGGCACCATCACCCTCGGTAACCGTCAGGCGTCAGAGTTT
ATCCCCGCACAAGGCGTGGAGGAAAAAGCGCTGGCCGACGCCGCACAACTGGCTTCGCTGGCTGATGAAACGCCGGAAGGCCGCAGTATTGTGATCCTCG
CCAAGCAGCGTTTTAACCTGCGCGAGCGCGATGTGCAGTCGCTCCATGCCACCTTTGTACCTTTTACTGCACAAAGCCGGATGAGCGGGATCAACATCGA
CAACCGCATGATCCGTAAAGGTTCTGTCGATGCCATTCGCCGCCATGTTGAGGCTAACGGCGGTCACTTCCCTGCCGATGTTGATCAAAAAGTCGATCAG
GTTGCGCGTCAGGGAGCCACGCCGCTGGTGGTGGTGGAAGGTTCTCGTGTGCTGGGCGTTATTGCGCTGAAAGATATCGTCAAAGGCGGTATTAAAGAGC
GCTTCGCGCAGCTGCGTAAAATGGGCATTAAAACGGTGATGATTACCGGCGATAACCGCCTGACTGCCGCCGCGATAGCTGCGGAAGCGGGTGTCGATGA
TTTTCTCGCCGAAGCAACACCGGAGGCCAAGCTGGCACTGATTCGTCAGTATCAGGCGGAAGGCCGTTTAGTGGCGATGACCGGCGATGGCACCAACGAT
GCTCCGGCGCTGGCACAGGCCGATGTTGCGGTGGCGATGAACTCCGGCACCCAGGCGGCGAAAGAAGCGGGCAATATGGTGGATCTCGACTCCAACCCGA
CCAAGTTGATCGAGGTAGTGCACATTGGCAAACAGATGCTGATGACCCGTGGCTCGTTGACCACCTTCAGCATTGCCAACGATGTGGCGAAATACTTCGC
CATTATTCCAGCGGCGTTCGCGGCAACGTATCCGCAGTTAAATGCGCTGAACATCATGCGCCTGCATTCGCCCGACTCCGCCATTCTCAGTGCGGTCATT
TTCAACGCCTTGATTATCGTCTTTTTGATTCCCTGGCGTTAAAAGGCGTGAGTTATAAACCGCTTACCGCTTCTGCCATGTTGCGCCGTAACTTATGGAT
TTACGGTCTGGGTGGGCTGCTGGTGCCGTTTATTGGTATCAAAGTCATTGATTTACTGCTAACCGTTTGCGGTCTGGTGTGAGGTTTACCATGCGTGGAT
TACGTCCGGCATTATCGACATTTCTCTTTCTGTTATTGATTACTGGCGGCGTTTACCCGCTGCTGACCACCGCACTGGGGCAATGGTGGTTTCCTGGCAG
GCCAACGGTTCATTGATTCGTGAAGGTGATACGGTGCGCGGTTCGGCATTAATCGGGCAAAATTTTACCGGCAACGGCTATTTTCATGGTCGCCCGTCGG
CAACAGCAGAAATGCCCTATAATCCACAGGCTTCTGGCGGGAGCAACCTGGCGGTCAGTAACCCGGAGCTGGATAAACAGATAGCCGCACGCGTTGCTGA
ATTACGGGCTGCTAACCCGGATGCCAGCACGAACGTTCCGGTTGAACTGGTGACGGCGTCAGCAAGCGGGCTGGACAATAACATCACCCCGCAAGCGGCG
GCCTGGCAGATCCCACGCGTGGCGAAAGCGCGTAATCTCAGCGTTGAACAGCTCACGCAACTGATCGCAAAATACAGCCAACAACCGCTGGTGAAATATA
TCGGCCAGCCGGTCGTCAACATTGTCGAACTCAATCTGGCACTGGATAAGCTTGATGAATAACGAACCCTTACGTCCCGACCCCGATCGTCTGCTGGAAC
AAGCTGCCGCGCCGCATCGGGGAAGCTGAAAGTATTCTTCGGTGCCTGCGCAGGCGTCGGGAAGACTTGGGCGATGCTGGCGGAAGCCCAGCGACTGCGG
GCGCAAGGGCTGGATATTGTGGTTGGCGTGGTAGAAACCCACGGTCGGAAAGATACCGCCGCCATGCTGAAAGGTCTGGCTGTTCTGCCGTTAAAACGCC
AGGCGTACCGTGGGCGGCACATCAGCGAGTTTGATCTCGATGCCGCCCTCGCCCGCCGTCCGGCACTGATCTTAATGGACGAACTGGCGCACAGTAATGC
GCCAGGTTCACGTCATCCTAAACGCTGGCAGGACATCGAAGAGCTGCTGGAAGCTGGCATTGATGTTTTCACTACCGTCAACGTTCAGCATCTGGAAAGT
CTGAATGATGTGGTCAGCGGCGTCACCGGAATTCAGGTACGGGAGACCGTGCCCGATCCTTTTTTGATGCCGCCGACGACGTAGTACTGGTGGACTTGCC
CCCGGACGATCTGCGCCAGCGGCTGAAAGAAGGCAAAGTCTATATTGCCGGGCAAGCGGAGCGCGCCATTGAACATTTTTTCGCAAAGGCAATCTGATCG
CCCTGCGCGAACTGGCACTGCGCCGTACTGCCGATCGCGTAGATGAGCAAATGCGCGCCTGGCGGGGGCATCCTGGCGAAGAGAAAGTCTGGCACACACG
CGACGCGATCCTATTATGCATCGGGCATAACACCGGCAGTGAGAAACTGGTCCGCGCGGCGGCGCGGTTGGCCTCGCGCCTGGGCAGTGTCTGGCACGCG
GTGTATGTTGAAACCCCTGCCCTGCATCGCTTACCGGAGAAAAAACGTCGGGCAATTCTCAGCGCCTTACGTCTGGCGCAGGAGCTGGGCGCGGAGACGG
CAACACTTTCTGATCCAGCGGAAGAGAAAGCGGTAGTGCGTTATGCCCGTGAACATAATCTCGGCAAGATTATTCTCGGTCGCCCGGCTTCGCGCCGCTG
GTGGCGTCGGGAAACATTTGCTGACCGGCTGGCACGCATCGCCCCCGATCTCGATCAGGTGCTGGTCGCGCTTGATGAACCACCCGCCCGCACGATTAAC
AACGCGCCGGATAGCCGCTCTTTTAAAGACAAGTGGCGGGTACAGATTCAGGGATGCGTGGTTGCCGCCGCGTTATGCGCCGTTATCACCTTAATTGCCA
TGCAGTGGCTGATGGCGTTTGATGCCGCCAACCTGGTGATGCTGTATCTGCTTGGCGTCGTGGTGGTGGCACTATTTTACGGACGCTGGCCTTCGGTGGT
TGCCACCGTCATTAATGTGGTGAGTTTCGATCTCTTTTTTATCGCCCCACGCGGCACGCTCGCCGTCTCTGATGTGCAATATCTGCTGACCTTCGCGGTG
ATGTTAACCGTCGGGCTGGTGATCGGGAACCTTACTGCTGGCGTGCGTTATCAGGCGCGGGTAGCCCGTTACCGCGAACAACGCACACGGCACTTATATG
AAATGTCCAAAGCTCTGGCTGTGGGCCGTAGTTCGCAGGATATCGCCGCCACCAGCGAACAGTTTATTGCCTCCACGTTTCATGCCCGTAGCCAGGTGTT
GCTGCCTGATGACAACGGTAAATTGCAGCCTTTAACACATCCGCAAGGAATGACGCCGTGGGACGATGCCATCGCGCAGTGGAGTTTTGATAAAGGCCTG
CCTGCGGGCGCGGGCACCGACACGTTACCCGGTGTACCGTACCAGATTTTGCCGCTAAAAAGCGGCGAGAAAACCTACGGACTGGTGGTGGTGGAACCGG
GGAATCTGCGCCAGTTGATGATCCCGGAACAGCAGCGCCTGCTGGAGACGTTTACGCTGTTAGTCGCCAATGCCCTTGAGCGACTGACACTGACCGCCAG
CGAAGAACAGGCGCGGATGGCAAGCGAACGTGAACAGATCCGCAACGCCCTGCTGGCGGCGCTTTCGCATGATTTACGCACGCCGCTTACGGTGCTGTTC
GGTCAGGCAGAAATCTTAACGCTCGATCTGGCAAGCGAAGGATCGCCCCACGCCCGCCAGGCCAGCGAGATTCGTCAGCATGTGCTGAACACCACCCGAC
TGGTGAATAATCTACTGGATATGGCGCGAATTCAGTCCGGCGGCTTTAATTTGAAGAAAGAGTGGTTAACGCTGGAAGAAGTGGTCGGCAGCGCGCTGCA
AATGCTGGAACCGGGTTTATCGTCGCCCATCAATCTTTCTCTGCCAGAGCCGCTGACCTTAATCCACGTTGACGGGCCACTCTTTGAACGGGTGCTGATT
AACCTGCTGGAGAACGCGGTGAAATATGCGGGGGCGCAGGCCGAAATTGGTATCAATGCCCACGTTGAGGGCGAAAATCTACAACTGGATGTCTGGGATA
ACGGCCCCGGTCTTCCACCAGGCCAGGAGCAGACGATATTTGATAAGTTTGCTCGCGGGAATAAAGAGTCGGCGGTACCGGGTGTAGGGCTTGGGTTGGC
AATTTGTCGGGCGATAGTGGATGTACACGGCGGCACCATTACCGCATTCAACCGACCGGAAGGTGGTGCCTGTTTTCGTGTTACACTTCCCCAGCAAACA
GCCCCTGAACTTGAAGAATTTCATGAGGATATGTGACAAACGTTCTGATTGTTGAAGATGAACAGGCTATTCGTCGCTTTCTGCGCACGGCGCTGGAGGG
CGATGGGATGCGCGTCTTTGAGGCCGAAACGCTGCAACGCGGCTTGCTGGAAGCGGCTACCCGTAAGCCAGATTTGATTATTCTCGATCTCGGCCTGCCC
GATGGTGATGGGATTGAGTTTATCCGCGACCTGCGCCAGTGGAGCGCGGTGCCGGTGATTGTGCTTTCCGCACGTAGCGAAGAGAGCGACAAAATCGCCG
CGCTGGATGCCGGAGCGGATGATTATCTGAGTAAGCCGTTTGGCATTGGCGAATTGCAGGCCCGTCTGCGCGTCGCTTTACGTCGCCACTCCGCCACCGC
CGCGCCCGATCCGCTGGTGAAATTTTCCGATGTTACCGTCGATTTAGCAGCTCGTGTGATCCATCGGGGCGAGGAAGAGGTGCATCTCACCCCGATTGAG
TTCCGCCTGCTGGCAGTGTTGCTTAATAATGCGGGAAAAGTGCTCACCCAGCGCCAGCTCCTCAACCAGGTGTGGGGACCAAACGCGGTCGAACACAGTC
ATTATTTGCGTATTTATATGGGGCATCTGCGACAAAAACTGGAGCAAGATCCCGCCCGCCCCCGCCATTTCATTACTGAAACCGGTATTGGGTATCGGTT
TATGCTTTGAATATTAATTTTAATACATCCTGCCTTTTATTAATTAAAGCCGTAATAATAAATACGGCTTTTTATCTTAAATAACACACAAAAATAACAA
TTCAATATTTTATATTACTGAGTAAAAAGCTCATCATTAAATAAATTAAGATTGATCATTTTTTATTGATCACCTTCACAGTTCAACCGTATTTCCTGGA
TAGAATACCTTCACCTTCATTCACATCAGGAAAGGTAAATTAAATGGAAAATAACAGCCGCACTATGCCCCATATAAGGCGGACAACTCATATTATGAAG
TTTGCTCATCGCAATAGCTTCGACTTTCACTTCTTCAATGCCCGTTAGTCTACCGACTAAGGGCACTTCAGCGTACAGGTCTTCCTGACTCTCTGTATTA
CAGGCATATGCCTGTATTCCGCAGTGCTCATTCTCTGTTAACCCTTGTATTATCAGCCACCAGACTGATAAGGGTTTCTGCATTCTGAAAAAAGCAAACT
TCTGATTAATTTATCAGCGGGGCAACTTTGCTTTTTTCCGGCACGATCAATTTCTCATTCGAGAAATTGAGGACCTGCTATTACCAAAAATAAAGAGTTG
GAAAATGTCAAAATTAAAAATTGCGGTTAGTGATTCTTGCCCGGACTGTTTTACCACGCAGCGAAAATGTATCGATATTAATGAAAACAGTAATATCGAT
GTGGCGGCAATAGTTTTATCGCTCAACGATGTTACACGCGGAAAACTCGATGAAATCGATGCCACGGGTTATGGCATCCCGGTATTTATTGCTACTGAAA
ATCAAGAACGTGTACCCGCAGAGTATTTGCCCCGTATTTCGGGTGTCTTTGAGAATTGCGAATCGCGACGAGAATTTTATGGTCGTCAGTTAGAAACCGC
AGCCAGCCATTATGAAACTCAACTGCGCCCGCCCTTCTTCCGCGCACTGGTCGATTATGTCAATCAGGGTAACAGCGCGTTTGATTGCCCCGGTCATCAG
GGCGGCGAATTTTTCCGTCGCCATCCGGCGGGGAATCAGTTTGTGGAATACTTTGGTGAGGCGCTGTTCCGTGCTGACTTGTGCAACGCGGATGTGGCAA
TGGGCGATCTGCTGATTCACGAAGGCGCGCCATGCATTGCACAGCAACATGCGGCAAAAGTGTTTAATGCCGATAAAACATACTTCGTTCTAAATGGCAC
TTCATCTTCTAACAAAGTGGTTTTAAACGCCCTGCTGACACCGGGTGATCTGGTGCTGTTTGACCGCAATAACCACAAATCTAACCACCACGGAGCGTTG
CTACAGGCTGGCGCGACACCGGTTTATCTGGAAACCGCACGTAACCCGTATGGTTTTATCGGTGGTATTGACGCTCACTGTTTTGAAGAAAGTTACCTGC
GTGAACTGATCGCGGAAGTCGCACCGCAGCGGGCAAAAGAGGCGCGTCCTTTCCGCCTCGCCGTTATTCAGCTAGGCACTTACGACGGTACGATTTATAA
CGCCCGTCAGGTGGTGGATAAAATTGGTCATCTGTGTGACTACATCCTCTTTGACTCCGCATGGGTCGGCTATGAGCAGTTTATCCCGATGATGGCGGAC
TGTTCACCACTGTTGCTGGATCTTAATGAGAACGATCCGGGTATTCTGGTTACGCAATCTGTGCATAAACAGCAGGCTGGTTTTTCCCAGACTTCACAAA
TCCATAAAAAAGACAGCCATATCAAAGGGCAACAGCGTTATGTATCGCACAAACGCATGAACAACGCCTTTATGATGCATGCCTCCACCAGCCCGTTCTA
TCCGCTGTTTGCCGCACTGGATATCAACGCCAAAATGCATGAAGGTGTCAGCGGTCGTAATATGTGGATGGATTGTGTGGTAAATGGCATTAATGCCCGC
AAACTGATCCTCGATAACTGTCAGCATATTCGTCCATTCGTACCTGAACTGGTGGATGGTAAACCCTGGCAGTCGTATGAAACAGCGCAAATTGCGGTTG
ATCTGCGCTTCTTCCAGTTTGTACCAGGTGAGCACTGGCATTCTTTTGAAGGCTATGCAGAGAATCAATACTTTGTCGATCCGTGCAAACTGTTGCTGAC
AACCCCAGGTATTGATGCACGTAACGGCGAATATGAAGCGTTCGGTGTACCCGCGACGATTCTTACTAACTTCCTGCGCGAAAATGGCGTAGTGCCGGAA
AAATGCGATCTTAACTCCATCCTCTTTCTGCTGACTCCGGCAGAAGATATGGCCAAACTTCAGCAACTTGCTGCTCTGCTGGTACGCTTCGAAAAACTGC
TTGAGTCCGACGCGCCATTATCAGAAGTACTGCCTTCCATCTACAAACAGCATGAAGAGCGCTACGCCGGTTATACCCTTCGTCAGTTGTGCCAGGAAAT
GCATGATTTGTATGCCCGCCACAACGTGAAACAACTGCAAAAAGAGATGTTCCGTAAGGAACACTTCCCACGCGTCAGCATGAATCCGCAAGAAGCCAAC
TACGCCTACTTACGCGGTGAAGTGGAGCTGGTTCGTCTGCCGGATGCAGAAGGCCGTATCGCTGCCGAAGGTGCGCTTCCTTATCCTCCGGGTGTGCTGT
GTGTTGTTCCTGGTGAAATCTGGGGTGGTGCTGTTCTGCGTTACTTCAGCGCTCTGGAAGAAGGCATCAACCTGCTGCCAGGTTTTGCACCGGAGCTGCA
GGGTGTCTATATCGAAGAACATGATGGTCGTAAGCAAGTTTGGTGCTATGTCATCAAGCCTCGTGATGCGCAAAGCACCCTGCTGAAAGGGGAAAAATTA
TGAGTCAGGCTAAATCGAACAAGATGGGCGTCGTTCAGTTAACCATACTGACGATGGTCAACATGATGGGCTCCGGCATCATCATGCTGCCGACAAAGCT
TGCCGAAGTTGGGACAATCTCAATAATCTCCTGGTTGGTGACAGCCGTAGGCTCAATGGCACTGGCATGGGCATTCGCAAAATGCGGTATGTTCAGCCGT
AAATCAGGAGGTATGGGCGGTTATGCCGAGTATGCTTTCGGTAAATCCGGTAACTTTATGGCGAACTATACCTACGGCGTCTCGCTGCTGATTGCTAACG
TCGCGATTGCTATTTCGGCGGTTGGTTACGGCACCGAACTGCTCGGCGCGAGTTTGTCGCCAGTGCAGATTGGTCTTGCGACCATCGGGGTGCTGTGGAT
TTGTACCGTGGCTAACTTTGGTGGTGCGCGCATTACCGGGCAAATCAGTAGCATTACCGTGTGGGGGTCATTATTCCGGTGGTAGGCCTGTGCATTATCG
GCTGGTTCTGGTTTAGCCCGACGCTTTACGTTGATTCCTGGAATCCGCATCATGCACCCTTCTTCAGTGCGGTAGGTTCTTCCATCGCTATGACGCTGTG
GGCTTTTCTTGGTCTGGAGTCTGCGTGTGCGAATACTGATGTAGTGGAAAACCCGGAACGTAATGTGCCAATCGCGGTACTCGGCGGTACGTTAGGTGCG
GCGGTGATTTATATCGTCTCCACCAACGTGATTGCCGGGATTGTGCCAAATATGGAGCTGGCAAATTCAACGGCACCATTTGGTCTGGCCTTCGCGCAGA
TGTTCACGCCGGAAGTGGGTAAAGTCATTATGGCGCTGATGGTGATGTCCTGCTGCGGTTCGCTGCTTGGCTGGCAGTTCACCATTGCCCAGGTGTTTAA
ATCTTCATCTGATGAAGGCTACTTCCCTAAAATTTTCTCCCGTGTAACCAAAGTGGATGCACCGGTGCAGGGAATGTTGACCATTGTGATTATCCAGAGC
GGGTTGGCGCTGATGACGATTAGCCCGTCGCTAAACAGTCAGTTCAACGTGCTGGTTAACCTGGCCGTGGTGACCAATATCATTCCGTATATTCTGTCAA
TGGCGGCATTAGTCATTATTCAGAAGGTCGCTAATGTGCCCCCTCAAAAGCGAAAGTTGCAAACTTTGTTGCTTTTGTTGGCGCGATGTACAGCTTTTAT
GCGCTGTACTCATCCGGGGAAGAAGCCATGCTATACGGTTCCATCGTGACCTTCCTCGGTTGGACACTGTATGGTCTGGTCTCACCACGCTTTGAACTGA
AAAATAAACACGGTTAATTAAGCAAAGCAAAAAAGGGCGATCTTCCGACCGCCCTTTTTCTTATTTGATATGTTTACGCGTTTTTCAGAACTTCGCTAAC
AATCTCAACCGCTTCTTTCTCAATCTGCTTGCGATGTTCTTCACCAAGGAAGCTTTCGCAGTAGATCTTATATGCGTCTTCCGTGCCTGACGGACGCGCG
GCGAACCAGCCGTTGTCAGTCATCACTTTCAGACCGCCGATAGAAGCGCCATTACCCGGTGCCACCGTCAGACGCGCGGTGATCGGGTCACCTGCCAGGG
TGCTGGCGCTCACCATTTCCGGAGACAGCTTAGACAACGCCGCTTTTTGTGCGGAAGTCGCTGCTGCCTGCAAACGGTTATAGCTCGGCGCACCAAAGCG
TTTTGCCAGTTCGTTATAGTGTTCCTGCGGGTTCTTACCGGTGACAGCGGTGATTTCCGCCGCCAGCAGACACATAATGATGCCGTCTTTATCGGTGGAC
CACGGCGTGCCGTCGAAACGCAGGAAGGAAGCGCCTGCACTCTCTTCGCCGCCAAAGCCGAAGCTGCCATCGAACAAACCATCAACAAACCATTTGAAAC
CTACCGGTACTTCTACCAGCTTACGGCCCAAATCATTGACCACACGGTCGATCATCGCAGATGAAACCAGCGTTTTACCGACAGCAACATCTTTGCCCCA
CTGCGGACGATGCTGGAACAGGTAGTTGATCGCCACCGCCAGGTAGTGGTTCGGATTCATCAAACCTGCCGGAGTGACGATACCGTGACGGTCATAATCC
GGGTCGTTAGCAAACGCCAGATCGAACTTATCACGCAGTGCCAGCAGGCCCGCCATCGCACACTCGGAGGAGCAGTCCATACGGATCGCACCGTCTTTAT
CTAGGTGCATAAAGCGGAAGGTTTGATCGACCTGATCGTTAACGATGGTCAGGTTGAGGTTGTAATACTCGCCAATACGCTTCCAGTATTCGATACCAGA
ACCGCCCAGCGGATCGACACCCAGCGTCAGGCCCGCTTTCTGAATCGCTGCCATATCAACGATATCGGCCAGCCCTTCCACGAACGGCTGCACCAGATCC
TGCTCTTTCACATGACCGGATGCCATCGCTTCGTCGAGGGAGATACGCTTCACGCCTTTCAGGCCATCAGCCATCAGTGCGTTGGCCTTGTCTTCCACCA
CTTTAGTGACGTTGGTATCAGCCGGGCCACCATTTGGCGGATTGTACTTGATACCACCATCTTCCGGCGGGTTATGAGACGGTGTAATCACGATACCGTC
TGCCAGCGGGCCACCTTTTTTATTGTGAACCAGAATGGCATTGGAAATGGCAGGTGTCGGAGTGAAGCCATTGTTTTCCTGCACAATGACATCAACACCG
TTCGCTGCCAGCACTTCCAGTACGGAAATGAACGCAGGCTCGGACAGGGCGTGAGTATCTTTACCCACATAGCAAGGGCCAGTGATGCCGTTTTTCGCAC
GTTCTTCAGCAATTGCCTGAGCGATCGCCAGAATGTGCGGCTCGTTAAAGCTGTGGCGCGCTGCACTGCCACGGTGACCGGAAGTACCGAATTTCACCGC
GTGCTCCGCATTCCCTGCTTCTGGTTTCAGTACATAATATTGCGCCGTCAGTTGGGCGACGTTAATCAAATCACTCTGTTGTGCAGGTTGGCCTGCACGA
TTGTGGATTGCCATTGCTTTGTCCTTTGTCTGCAACGTTTTAGATAGTTCCGCAAACCTTCTCAATCAATTCCGCCGGGAATTGCATCGACTGCATGATG
TGTTCGATCATGCTGCATTTACGGCCGGTGTTGGTGTTGGTGATCACCCAATACGGCGTACCAGGCACATGTTTCGGCTTGGTCTGATTACCATTTTTCA
GCAGCGTTTGTTCATCTGCCGCAAAGTAAACGCGTGTACGACCGTGCAACGATTCCGTTGCTTCGGCAAACGCCTGGGCGTCAAGAGAATATAGTGTAGA
CAACAGCAGCATAAAGCGATTGACCGCTCGCTTTTGCTCTGCGTATTCATCCGAAAGCAGAAGTTCACGCATTGCGCGAACCTTGTCTTTAATCGTTTTG
ACCGGCTTCGCTTCGACGATAGCAGGTGACGCAACGCGAACCTCTTTCGTCACCGGAGCAGCAGGCTGTGATGCGGCGGAAAATTTCAACATACGCCGTA
AAATGTCGGATGCGCTCTCGCCGATATGCTTAGTGTGGCTGGCAATATAGCTGTAGAGTTCATCATCAACTTCAATCGTTTTCATCTTAATCCAGTGCAG
TGTCTTAGCTGAATACAAGTCGCCAGGAGTATATGAATAAATCCCGGCAGCGGATAGCGTCAAGCCTGGCTTGCAGAAAAACTCGGAATAAACCTTATTT
GTTGCAGCCCTGTGGCACAATGGTCAACATAATACCCTAACCCGACAACGCGAAAAAAGAACTTTGCCATGAAATTGAATATCCGCGCGCAAACTGCACA
AAACCAGCACAATAATTCTCCCATCGTTCTTGTCCATGGTCTGTTTGGTAGCCTCGACAACCTTGGCGTACTGGCTCGCGATCTGGTAAACGATCACAAT
ATCATCCAGGTTGATATGCGTAACCACGGTCTTTCACCGAGAGATCCGGTAATGAATTACCCGGCGATGGCCCAGGATCTTGTTGATACCCTGGATGCAC
TGCAGATCGACAAAGCAACATTTATCGGTCACTCCATGGGCGGTAAAGCGGTAATGGCACTTACTGCACTGGCCCCCGATCGGATTGACAAGCTGGTGGC
AATTGATATTGCGCCGGTCGATTATCACGTTCGCCGGCATGATGAGATTTTCGCGGCCATCAACGCAGTCAGTGAATCGGACGCACAAACTCGCCAGCAA
GCAGCAGCAATAATGCACCAGCATCTTAATGAAGAAGGGGTGATTCAGTTTCTGCTGAAATCTTTTGTTGACGGGGAGTGGCGCTTTAACGTGCCGGTAT
TGTGGGATCAGTATCCGCATATTGTGGGTTGGGAGAAAATCCCGGCATGGGATCACCCTGCCCTGTTTATCCCAGGCGGCAATTCTCCGTATGTTAGCGA
GCAGTACCGCGATGATTTACTGGCACAATTTCCACAGGCACGGGCGCATGTGATTGCTGGCGCGGGTCACTGGGTCCATGCTGAAAAACCGGATGCGGTA
TTACGCGCTATCCGTCGCTATCTCAATGATTAACGCAACTGATTAAAAACCCAGCGTCCGCGTCGCTTTCCGCGCGTGGACGTTGGCGTGACTCATCGCG
CTGATGTATTATGGCGCGCTATCCATCCGGGCAGGCGCCTGGCTGATTGTTTCCCCGAAGTCACCAAGATCATGGCCAAAGAACAAACGGACCGTACGAC
ATTAGATCTGTTCGCGCACGAGCGTCGACCGGGACGACCGAAAACTAATCCGCTTTCGCGCGATGAACAGCTGCGTATAAATAAACGCAACCAACTAAAA
CGCGACAAAGTACGTGGCCTTAAGCGTGTCGAACTGAAGCTGAACGCGGAAGCTGTCGAGGCACTGAACGAGCTGGCGGAATCGCGCAATATGAGCCGTA
GCGAGCTGATCGAAGAGATGTTAATGCAGCAACTGGCGGCGCTGCGTAGTCAGGGCATCGTTTAAATTTCCACTTTCATGTAGCACAGTGTGCAGTCCTG
CTCGTTTGCTGATTCCGCAAGACTGCCTGTTCTGCTATGATTGCCTTTATCCGTGGGCAATTTTCCACCCCCATTTCAATAAGTTTCAAGAGGTTATTTC
ACTCATGGCTATCACTGGCATCTTTTTCGGCAGCGACACCGGTAATACCGAAAATATCGCAAAAATGATTCAAAAACAGCTTGGTAAAGACGTTGCCGAT
GTCCATGACATTGCAAAAAGCAGCAAAGAAGATCTGGAAGCATATGACATTCTGCTGCTGGGCATCCCAACCTGGTATTACGGCGAAGCGCAGTGTGACT
GGGATGACTTCTTCCCGACTCTCGAAGAGATTGATTTTAATGGCAAACTGGTTGCGCTGTTTGGTTGTGGCGACCAGGAAGATTACGCAGAATACTTCTG
CGATGCATTGGGCACCATCCGCGACATCATTGAACCGCGCGGCGCAACTATCGTTGGTCACTGGCCAACCGCGGGCTACCACTTCGAAGCATCAAAAGGT
CTGGCTGATGATGACCACTTTGTCGGTCTGGCTATCGACGAAGACCGTCAGCCGGAACTGACCGCTGAACGTGTAGAAAAATGGGTTAAACAGATTTCTG
AAGAGCTGCATCTCGACGAAATTCTCAATGCCTGATGTGATGCGGCGTAGACTCATGTCTACGCCGTATTAATAGATAATGCCAATCAAAATAATTGCTA
CAAATTTGTAACTTTTGCTGTTGTACCTGTACAATGTCCCGGTGTTCAAGTGGCCTTGCCGTTGTAAATGTAAGCTGTGCCACGTTTTTATTAACAATAT
TTGCCAGGGACTTGTGGTTTTCATTTAGGCGTGGCAATTCTATAATGATACGCATTATCTCAAGAGCAAATTCTGTCACTTCTTCTAATGAAGTGAACCG
CTTAGTAACAGGACAGATTCCGCATGACTGATAACAATACCGCCCTAAAGAAAGCTGGCCTGAAAGTAACGCTTCCTCGCTTGAAAATCCTGGAAGTTCT
TCAGGAGCCGGACAACCATCACGTCAGTGCGGAAGATTTATACAAACGTCTGATCGATATGGGTGAAGAAATTGGTCTGGCTACGGTATATCGCGTACTG
AACCAGTTTGACGACGCTGGTATCGTCACCCGCCACAATTTTGAAGGCGGTAAATCCGTATTTGAACTGACACAGCAACATCACCACGATCACCTGATCT
GCCTCGACTGCGGTAAGGTTATCGAATTTAGTGATGATTCCATCGAAGCGCGTCAGCGTGAAATTGCCGCAAAACATGGCATTCGCCTGACTAACCACAG
TCTCTATCTTTACGGTCACTGTGCCGAAGGCGATTGCCGCGAAGATGAGCACGCGCACGAAGGCAAATAAGCCAGCCTGAACGAGAAAAGCCAACCTACG
GGTTGGCTTTTTTATATAAGGGAAATAAGAAAAGCGAGAGTTACAGCTCTCACTTATTTGTTATTACTGCGAATTTCCTGCCAGACCTTATCACAATCGG
CTTTCACCGCCTGATCATTTCCGGTTTGCGTTGCCTGAATACACTGCTGATAATCCAGTACGCGGACACTTTCCTGCTCGGCAAACTGCTGATGTTGTTT
CTCTTTCTTCAGCACGTTTAACACGCTCTGGCAGGCTTCAATTTTTTCCGGCGAACCTTGCGCGGTGTTGATACAGGCGCTGTAAGCCTCTTTCAGACGA
CTGTCTTCCTGCGGTGCGGTTGATTGCGCACAAGCTACCAGCCCCGATGCCATCATGGCGATGAGAATCAGTTTTTTCATAGCAAATTCCTCAAACGTGC
GGCAGGCACAAAACCTGCCGCGTCGGGCATCAGAAGATGGTGAATGGTGCGATTACCATAAATTTCACGTCGCGCTCATCCTGGAAGATGTTACCGTAAC
CGCCGCCCCAGCTTGGGATGTCGGAGTGGTTGTCATATTCGGTGAAGTGCAGTTTGAACATCGTGCCTTTGGCGCGACCGTCCTGAATGGTGTACACCGC
ATCCAGGCTGTAGGCAGACTCTTCAATAGTCCGGTTTTTGTCGTAGTACGCATCCGGATTGCTCTGCCAGGTCGCAGGTTTAGCATCCCATGCGTAAACG
TAGGAAGCGCCGATGGCGAAGCCTGGAAGATTCCAGTTTTTCAGGTCATACATCGCACCGAAGAAGACCGCTTTTTCGCCGTTGGCGTTGAAGTCAGAAC
GGTTATCCCACCAGATATCCAGGCGACCGTTCGAGGAAGCGTAGGTTGGAGTCATACGTTGCAGGAAGTATCCCTGCTGACCGTCAGCCTTAACCCAGGT
ACCTTCGAGGCGCAAATCCACTACGTCAGCCGCCCGGTAACCAAAGGTCAACGCCTGCAGCCAGGCGGTGCCGTCATAAAGATCGTTGACGCTGCGATCG
TCAACTTTATCGCGCGTACCATAGAACTGGTAGCTGGTGGTTAACGGGCTACCGGCGATATCAAATTTGTAGCTTGCTTTGGCAAAATATTGATCGATAT
ACCCTTCGGCCTGACCAAACGCCGCTTCCAGTACGAAGTTATTTTTGAAGTCGTACTTCGCCCCAAGGGAGTGTAGATAATCAACTTTGGTGGTTTTATC
ATTCTGATAAAACTCATCCATTTCCAGATGCCACGGTGCTTTGTATTCGTTGGTCCACATGTAGGAGAAACTCAACGCACCAGCATCGCCGTAATCAAAA
TTCGCCCCGGCCTCCGCCCCTGATAAGTACCCGGCATAAAGCTCCAGTGTGGCACTAACAGCGTCTGACCGGTTGGCTGAATATAACCTGCCCTCGCCCA
AACCGGACCGTATTTAAATTTGGCCGCTGCTTTATACAGGCTTATACCGCTTTTATCGCCGGACCAGTCTTCGTCATAGGCTTTATTACTTTTTGAAAAC
GCGATTTCGTTCGGGTGAGAGCTGTCGCCGTTTTCCGCCATTTCAATCGCCGTAAACGCGGCAATATCAAGGCCGAACATATCAGCAGCATAACCAGACT
GAAAATCGAGGTTGGCGTTCCAGGTGGAGTGAGAAAGGTTAGTTTTGTATTTATCGCCGTCGGTAACATCTTTACGGTCGCGTTCACGCTGCCAGTAATA
GATACCGCCGGTTAAGGTTGAATCGTCGATGAATCCTTCGGCGCGAGCCTCCGGAATTGCCATAAAGCCCGACATAGCTGTAACACCGGCGATAGCCAGC
GCCAGCGTACTACGTTTGCCACTAAACGCACGCATGGGTTAATCCTCTTTGACGTATAAATTGCTGCACCAAAGGTGAACAGCGAAAAAAATAAAAATTA
AAAAAGTAGCGTTGAGAAAAGTCTCGCTGACTACAGGAACAGACTATTTTTCGCGACGCGAATTATCAATCTCTTTCTGTAACCAGAATGTAAGAACATG
AGCAACCGCACATATTTTGATGATTTTTGTTACAAGGCTTAAGTTTGCAGTTGAAAGGCTTGCAGAAGAATAAAAACGTGAAATTCCAGCAAGATGAAAG
CGGTTACATTTTATTTAATTATGTTTTGTGATTTTAAATTTATTTTATGGATAAATTGCGAAGCGGAATTAATTCGCGAAGAAAAGCAGAAAAAACGCCG
CAGAGCGCGGCGTTTGGGATAATTTGCATATTTCTTGCCGGATGCGGCGTAAACGCTCTATCCGACAACGTAAACTTACTCGCCTACTTTCGCCCAGGTA
TCACGCAGCCCAACGGTGCGGTTAAATACCGGTTTTTCCGCCGTAGAATGGCGGCTGTCGAGGCAGAAGTAACCTTCACGCTCAAACTGGAATGCTTTAC
CCGCAACCGCATCTTTCAGCGACGGTTCAGCAAAGCCCTGTTTGATCACCAGCGATTCCGGGTTAATCACCGACAGGAAATCATCCGCAGCACCAGGGTT
CGGCACGCTGAACAGACGGTCATACAAACGGATTTCAACCGGCAGCGCATGTGCCGCGCTCACCCAGTGAATAACACCTTTGACTTTACGACCATCTGCC
GGATCTTTGCTTAAGGTGTCGGCGTCATAAGTACAGAAGATGGTGGTGATATTGCCTTCGGCATCTTTCTCGACGCGTTCTGCCTTAATGACGTAAGCAT
TACGCAGACGCACTTCTTTACCCAGCACCAGACGTTTGTACTGCTTGTTAGCTTCTTCGCGGAAATCGGCGCGATCGATCCAAATCTCACCGCTAAATGG
CACCTGGCGGCTGCCCATTTCCGGTTTATTCGGATGGTTCGGCATGGTAACCATTTCGCCTTCGCCCTGGTAGTTTTCGATAACCAGTTTCACCGGATCG
ATAACCGCCATTGCGCGCGGCGCATTTTCGTTGAGATCTTCACGGATGCAGGATTCCAGTGACGCCATCTCAATGGTGTTGTCCTGCTTGGTCACACCAA
TGCGTTTGCAGAACTCACGAATAGAAGCCGCAGTGTAACCACGACGACGCAGACCAGAAATGGTCGGCATACGTGGGTCATCCCAGCCTTCAACGTGCTT
ATCGGTCACCAGCAGGTTCAGCTTACGCTTGGACATCACAGTGTATTCCAGATTCAGGCGCGAGAATTCGTACTGGCGCGGGTGAACAGGAATGGTGATA
TTGTCCAGTACCCAGTCGTACAGACGGCGGTTGTCCTGGAACTCAAGCGTACACAGAGAGTGCGTAATACCTTCCAGCGCATCGCTGATGCAGTGGGTGA
AGTCGTACATCGGGTAGATGCACCACTTGTTGCCAGTCTGGTGGTGTTCAGCAAACTTAATGCGGTACAGCACCGGATCGCGCATCACGATAAACGGCGA
AGCCATGTCGATCTTCGCACGCAGGCAGGCTTTACCTTCTTCAAAACCGCCGGTACGCATTTTCTCGAACAGCGCCAGGTTCTCTTCAACGCTGCGATCG
CGGTACGGGCTGTTTTTACCCGGCTGCGTCAAGGTGCCGCGGTATTCGCGGATCTGTTCCGGCGTCAGTTCATCAACGTACGCCAGGCCTTTATTGATCA
GTTCGATCGCATAGGCGTGGAGCTGATCAAAATAATCGGAGGAGTAACGGACGTTACCAGACCAGTGAAAACCTAACCACTCTACGTCGTTTTTGATCGA
ATCGACATACTCGATATCTTCTTTTACCGGGTTAGTGTCGTCGAAACGCAGGTTGCACTGGCCTTTATAGTCCTGGGCGATCCCGAAGTTCAGGCAGATA
GATTTCGCATGGCCAATATGCAGATAGCCATTCGGCTCCGGCGGGAAACGGGTGTGTACTGTGGTGTGCTTACCACTGGCCAGATCTTCATCGATGATCT
GACGGATAAAGTTAGTCGGGCGGGCTTCTGCCTCACTCATCAGGATTCCTCAAAGCGTAAACAACGTATAACGGCGTATGATCTTATAAGCGGGACAGGC
TGACAACTGTTAGTTAGCGAAAAAATGGTTTTGCGTAAGATATTGGGGCGTTTTCTGCGCTACTGCCAGCAGATCCTCGCGCTGGAAACGTAAGGCCAAA
CGTCGCCAGCCTGACGCATTTATTAAATTGCCGGATGAGCTGGCCGCAGAGTCATAGATTAGTCGGCTATGATTAAACGCGTCGACAAGGACGCAAGCGT
TCTACGCGTCTGCCCATCAAGCTGACTATCCGTAATAATCTCTGTCAGTTCATTAAGATGCGCGATATTAAACAGCGACCATGAACCGTATTTTGAGCTG
TCAGCCAGGAGAATTTTGCGCGAAGCATGCGCGATAAGATCGCGTTTTAGTGCGGCTTTCTCTTCCGTGGGTGCTGTAATACCCTTTTCAAGATCCCAGC
TGTTACAGCTTAAAAATGCCACGTCCGGCCAGGTATTTTGCAGCAATTTACGACCATGTTCGCCAATGCAGGACTGGCTGGAGTCGTCGATACGTCCGCC
GATAATCGTCACTTCAATTTGCTTGAATTCAGCCAAAAAAAGCGCGATATGCAGGTCGCTGGTGATCACGCGAAGCGGTAAATGTGTAATCTGCCGCGCA
AGTTCAATCATTGTCGTACCGGCATCAAGGACGACGGAATCCCCCGCTTTGACCATTGACGCCGCTGCGCTGGCGATAGCATGTTTTTCCGCCAGGCTGC
GCTGCATTTTCTCATGGGTAGTCGGTTGGGTAGGAATAAACCGGTTGAGGGTCACACCGCCGTGTGTACGGCTGATAACACCCTGCTCATCGAGTTTTAT
CAGGTCTCGACGAATCGTAGCCGGCGACGCATTGGTTACCGCCACCAGCTCATCAACGGTGACCAGATTATGGCTTTTCAGGTAATCCATGATCTGCTCT
AACCGGTTATATCCCTTCATTTTATTCTCGCGAAATCTGCATTGCTAACTGGATGGAAACTGCCATGCTCTCAGACTTGGCTTTTCCTGTCCAGGCAATA
TCAAACGCGGTGCCGTGGTCGGCAGAAGTGCGAATAAATGGCAACCCGGCGGTGATATTCACCCCATCATAAAATCCAAGCAGTTTTAAAGGGATATGCC
CCTGATCATGGTACATAGCCACCACCATATCGAATAGCCCTTCATGGCACTGCATGAACACGGTATCTGGCGGGCACGGGCCAGTAACATCAATATCTTC
GGCCTGCATTGCTTCAATCGCAGGTGCGATAATCTCGATTTCCTCAGTGCCGAATAAACCGTGTTCCCCTGCATGTGGATTTACACCCGCCACGGCAATA
CGCGGACGCTCAATGCCGACACGTTTCAGGAAGTGGTTCGCAACTCGAATAACCGTTTTGACCCTTTCACCATTCAAAGTATCCAGGAATTTACGCAGTG
AGATGTGAGTCGAAATATGGATAACCTTGAGCTTATCGGTATAGAGCACCATCGCGTACTCTTTGCTGCCGGTAAGATGGGCCAGCAATTCCGTATGCCC
CGGATAGTTATGCCCGCCAAGATGCAGCGCTTCTTTATTCAACGGCGCAGTGGCTATGGCTTTCACCTCGCCTGATAAGGCCAGGGCCGTTGCACGTTTG
ATACAGCGATACGCTAAATCGCCTGCCGCAGCCTGTACCACACCAGGTGTCAGCGCATCGGGGTTAGCCAGAGGCTCATCCATCACGTTAATCACGCCGG
GAGCAAAGTGGGCGTCGCACACCTTTTGAATGACGCGTAACTCTGCCTGCGGCGTGATATTCATCGCCATAATACGTCGCAGCGTGCGCACACAGCCCAC
CACCACCACCGGGGTACCAGCAAGCCCGGCTTCGCTCAGGGATTTAATAATGATCTCCGGGCCAATACCCGCCGGATCGCCCATCGTTACCGCAATAATG
TTATTCACTACGCTTCTCCTCGATAAAATTCAGAACCTGATGCAACGTGGTCTCATCGCCAAACCCACCGGCTTTCGTCATCACCGAACGGGACCAGACG
CCGCCCAGAAAGTGACCATATGGAACGCATTGCGCCACCTTCCCCGTAATACGAAACCCGGTCGCGCCTAACGCACTGGCTGTTGCCATTGCGACATCGC
CACCAGAGAGATAAAGCGCATCGGGCATTGTGCGAAGCAGAACTTGCCGGGTAAGTTCGCCAAGAAACCGACAAATTTTTCCCCAAGTGCAGCGCGACTC
ATCTGCCAACGCTGGCAAAGGGTGTCGATCTGATGCCTTGCTACAGAATCGTTACAGGTGTGGACAATGCAGTGGTCGCCTTTCTGCAAGGCCTGCACAA
TACGCGCGTCATAGTCACTGGCATTGCCTGCCAGAATGTGTTCAACATCGACGTATATCTGTGTGATACGTGGGTGTGAATGCAGTGTGGCGATCTGCCG
TTGAGCGATTTCGCTCATTGAACCAATAATGGCCAGCACGGTGGGTGGCGGCATAATCGCGGAGCGCCGGGCAACGGCATCACAAATACCAGCGGAGCCG
ACCAGCAGTAGCGGTTGTTTAGCCTGCATCACAGCGGCAGCGATGCGATCCAGGTCGCTGTCCGTCTGCGCATCTATCACGCCAATCCACGGTTGCTCAT
AAGACAAATGGCTGAGCTGAGAAACCGTAACGGGCTGGCATGGAATGGCCGTCTGCAACCGGATGATGTCCGCAATTCGGGCGCTCAATACCGGGGTTTT
CGGATCGCTGGCAAACTCGGTTTCCGTTATCCGCACACCGTTTACCCAACACTCACCGGCCACTGTGGTCCTTCCCGCCTGAGGAAATGCGGGGGCAATC
ACTGCGCCCGTTATACCGCATGCCTTCATCAGGGCTTCAATTTCTGCGCCGATATTGCCTCGAAGCGTGGAATCTATCTTTTTAATCACGAGCGGCGGGT
TATTCGCCAGAGGGAGATGACTCATCAGCGAGGTTATTTTCATCGCCGCCAGCTTAGGATCCATCGCCCGGCTGTCGCTGTTAATCACCCATACGCTGGC
ATCACCGTGATAAGGCATTTCAAAGGCCACATCAACTGTATGCCCCACCTGCGCCAGGCTTACCCCCGCGTCGTTGGCTCCCGTGAAATCATCGGCAACG
ACGAGAATGCTCGGCTTAGTGATTCCCTTTTCCATCATCACTCCAGGTTGTTTTATGATAATAATGATTATATTCAATCACAATTGATTAAATGTGAGCA
AGCTCAAGTTATTAATCACTCGAATAAATTATAAAATTAGACCATGTTACGTAGGCTACGGCATTTTGAATGATTGAATTCAATCACCAGAAGAGAGGTT
ATTTGTGGTAATTATCAATAGCACGATACTGAGCGGCGCAGGCGCTATCCCTTCCCTGACGTCGCTCTTACCCGACATCAGAAAAATGCTGCTGGTCACT
GACCGTAATATTGCGCAGCTCGACGGTGTGCAGCAGATTCGCGCCTTACTGGAACAGCACTGCCCGCAGGTTAACGTTATCGATAATGTGCCCGCAGAGC
CCACGCATCATGATGTGCGCCAGCTAATGGATGTCCTTGGCGATGCCTCTTTTGATGTGGTGGTCGGGATCGGCGGTGGCAGCGTGTTGGATGTGGCAAA
GCTGCTATCGGTGCTTTGCCATCCACAATCTCCGGGGCTGGATGCGCTGCTTGCGGGTGAAAAACCAACTCAGCGGGTGCAATCATGGTTGATTCCTACA
ACCGCCGGAACCGGCTCAGAAGCCACGCCGAATGCGATTCTGGCAATCCCTGAGCAAAGCACGAAGGTGGGTATTATTTCCCAGATGCTGTTACCAGACT
ATGTGGCGCTTTTCCCGGAACTGACCACCAGCATGCCTGCGCATATTGCGGCGTCCACGGGCATTGATGCTCTTTGCCACTTACTGGAGTGTTTTACCGC
GACCGTGGCAAATCCGGTCAGCGATAACGCGGCGCTGACTGGGTTAAGTAAACTTTTCCGGCACATTCAACCCGCCAGAACGATCCTCAGGATCTGCGCG
CAAAACTGGAAATGCTGTGGGCGTCTTACTATGGCGGCGTAGCGATAACCCATGCGGGCACGCATCTCGTTCATGCGCTCTCCTACCCGTTAGGTGGCAA
ATATCATCTGCCGCATGGCGTCGCGAATGCCATCTTGCTGGCGCCGTGCATGGCGTTTGTTCGCCCCTGGGCGGTCGAGAAATTTGCCCGGGTCTGGGAT
TGCATTCCCGATGCGGAAACCGCCCTGAGCGCGGAAGAAAAATCTCATGCCCTGGTGACCTGGTTACAGGCATTAGTCAATCAACTCAAGCTACCCAACA
ATCTCGCAGATCTCGGCGTACCGCCAGAGGATATTGCCTCTCTTAGCGAGGCGGCACTGAACGTGAAGCGCCTTATGAACAATGTGCCGTGCCAGCTTGA
TCTACAGGACGTACAGGCCATTTACCAAACACTGTTTCCGCAACATCAATTTAAGGAATAAATCATGCCGAAAACCATTGAAGGTGTATTAACCGCTATC
GTCACCCCGTTTACCGCGACCGGCAGTCTGAATATCCCGGCGTTAAAAGTGCAGGTGAATCGTCAACTGGAAGCGGGTAACGCGATTTTTGCGGCGGCAC
CAACGGCGAATTTTTTGTGTTGAATGAACAGGAGAAGCTCAGCGTTACGCAAACCTGCGTGGATGAAGTGGCTGGTCGTGCGCCGGTCGTGGCACACATT
GGCGAGATCTCTACGCGCGAAACGATTCGTCTGGGTCAGCAGATTGAAAAACTTGGCGTAGATGCCGTGTCGGTCATTGCCCCTTACTTCGTACCGCTGA
AACAGGAAGAGTTGATTGCGCATTACAGCGCAATTGCCGACGCACTGAGCATTCCGATGTTTCTCTATAACATCCCGGCCCGCACTGGCAATACGATCCA
GCCAGAAACCGCGCGTGCTCTGGCGTCGCACCCCAATATCATTGGGATTAAAGACAGCGCCGGAAGCGACGAAAGCCTGAAGGGTTTTCTCGATGCGGTG
CGCGACATTGACGGCTTTAATGTGCTCAACGGCCCGGATTCGCTGATCCATAAAGGGTTTGTCGAGGGATGTTCAGCCTGTATCTCTGGGCTCGCCAACA
TCGCGCCGCGAGAAATCAATGCCATCTGGTCTCGCTTCCATGCCGGTGATATTGAAGGGTCTTATGAAGCACAGGAGAGTGTAACGGGCCTGCGTACCGA
TCTTTATAAAGTAGCATTCTCCCCGGCTGCGGTGAAAAAAGCGTTGCAGCTTATGGGGCATGATGTTGGTGATAGCCGCTACGCGGTTAATTTCACGCCT
GAACAGATCAGCGAGATTCAACAAATTATTCGTCATTATAACATTAATTAAATTAACTCTATTATCCAGCCCGCTATAAAGTTTAGATAAAGAGAATAAA
GGATTACCCCATGTTTTTGTGGTTTATGCAGCCAGATATCTGGCTCACTTTAATTACCCTCACCTTTCTGGAAATTATTCTTGGGGTGGATAATATTATT
TTTCTTTCACTGGTGGTGGCAAAACTTCCGTTATCACAACAAAATATGGCGCGTAAACTGGGTTTAAGCTGCGCGATGATTATGCGGATATTATTGCTGA
TATCCATTGCGTGGCTTTCACATATTACCCAGCCGCTTTTTACCGTGCTGACGCTGGAGATTTCGTTCCGCACGTTGATTCTGCTCGGGGGCGGGCTGTT
CCTGATTTATAAAGCGATACAGGAGATACGCGAAGAGCTGTCGCCCGCGCAGGAAGACGAACATGGCAGCGGATCGCGGCAACTGTCGTTGTGCGGTGCC
ATTGTACAGATAATGCTGCTCGATATCGTGTTTAGCCTGGATTCGGTGATCACCGCCGTCGGCCTTTCTCAGCATATATTTATCATGATTGCCGCCGTAA
TGATTGCCGTCGGTGTCATGATGTTTGCGGCGAAAACAATTGGTGATTTCGTTAACGCCACGCCGTCAATAAAAATACTGGCGTTAACCTTTTTATTGTT
TGTCGGTGTATTGCTGGTTGCCGATAGTCTCAACATTCATATTGCCAAAGAGTATCTCTACTTCGCGATATTTTTCTCATTAAGTGTTGAGACACTCAAT
ATTATCCGTGAAAGAAGAAATAAAAAAGTTTCGACATTGATCGAAACGCATGAATCGCACTCGCATTAATAAATCTATTACCAACTTTAAGATGGAGTCT
AACTATGTCTGTAGCCCTTATTCGTGACGGCGTCATCCGTCCATCCGAAAACGATTCGCATGTGCTTACCGCCATGCTGCCCTCGTCCTGCCCGCAAAAC
CACGCGGCGAATATTCTGCCAATGCCGGATGGCGCATTAATGTGCGTCTGGTTTGCGGGAACACAGGAAGGTATTGCCGATATTTCTGTCTGGGGATCAC
GATTGCCCGCTGGCAGAACGCAGTGGAGCGATGCGGTCAAACTTTCCCACGATGACACGCGTTCAGAGCAAAACCCGGTGCTGTTTCTCGCGCCGGATAA
CGTGCTGTGGCTGCTATGGACCGCACAAATATCCGGTAATCAGGACACGGCCATCGTCCGCTACCGTAAGTCTGACGACCTTGGGCAAACCTGGGGCGAG
ATTGCCACCCTGCTCGATAAACCCGGCACGTTCATTCGCCAGCCGATCACGGTGCTTGATAACGGTAACTGGCTGCTTCCCGTCTTTTATTGCCGTACCC
AACCCGGCGAAAAATGGGTCGGCAATGATGATATCAGCGCAGTGAAAATTTCCGCTGACGGTGGTCACTCATGGCGCGATGTCGAGGTGCCGCAAAGTCT
CGGCTGCGTTCATATGAATATCACAATGCTGCACGACGGTACGTTGGTTGCTCTCTTTCGCAGCCGTTGGGCAGACAACATCTATATCAGCCATTCAGTG
GACAACGGCGAGAGTTGGTCGGTGCCGCAAGCTACCGAATTGCCCAACAACAATTCGTCTATTCAGGTAACGACGCTTGCCAGCGGCGAACTGGCGCTGG
TGTACAACGCGATGAGTGCGGCAGGCGCAGTAGAACGTCGCGCGTCGCTTTATGACGAAATCGACGATGGCGACGACAGCCGCAAAGAACCGACAGCCGT
CGGACGCTCCGCTTTCTGGGGGCCCCACGCGCGCCGATGACGGTAGCGATTTCTGCCGATGGTGGGAAAAGCTGGCCGTGGCGGCGCAATCTCGATGAAG
GCGACGGCAACTGCATGACCAACAATTCCCTGGAAAAGCTAAATCGTGAGTTCTCCTACCCCAGCATCAAACAAAGCCCGGACGGTACGCTACATATCGC
TTACACCTGGTGGCGTCAGGCCATCAAGTACGTGCGCATCTCCCCGAGTGGGTTAAGGGGCAGGCATCATGATTATCGGTAATCTCAACCATTTGTCGCT
GGCGGGGCTTCCCGCCTGGGTGAGAAATATTCTGCTGTGCCCGGAGTGTTCGTTATCGGCGTTATCCGCCAGAGAGGACGGTCGCTGGCAACCTGAAGGA
TGTCGGTGGTTCTGCACGCTGGGAACTTCAGACACGCAACCCGCCGAACTCCGCCATACGGAGTATCACCATCTGTGGGCCGATATCCAGGTGGTGATTA
CTGGTTGTGAGGGCATTAATGCGGGAACGCGGCCCATCGCTCGCGAAAACGATGAAGAACGTAAGCCCGATCTGTTTATCGCCCCATCCCCTGAAAACAG
TGTCGCCATCACTCTACACCCCGGTGATTTCGCCGTCTTTATGCCTGAGGAACCTCACCAGGCGCTGTGCGCGATTGGCGCGGCTACGTCAGTACGCAAA
GCGGTCTTTAAGGTACCGCGCGACATGCTGGAAGCCTAAAAGGAGAGAAAAAATGACAATGGAAATGATCCTGGCATTAGGAATACTGGTCCTGATGATC
GTGCTGATCATGTCGGACAAAATGCCATTTGGCGCACCGCCACTGCTTGCGTGTTTATTGCTGGTTGTCTCGGGACTTTCGACCGTTCAACAGGCTTTTG
CCGGATTCGTCAATCCAAGCGTGGTGATGATTGCAGGGTTTATGGTGGTCATGGCAGCGCTACAAAAAACCCGGCTTATCAGCAACGTTAAATCTGCGAT
GATAAGCCTGGTCAATAAAGGCAGTTACCGCAGCTACGGGCTGTTGTTAGTCATTGTTATGCTGGGTGCCAGTCTTGCAGGCACCGGCGCGACCGGTTAT
TACGTGCTGATTCTGTCGCTGGTATCCACCATTCCGTACAGTAAAAAGCTACCAACATCGAAATTAATGATGCCCCTGGGATTTGCCACCAACCACCCGC
TTCTTCCTATCAATCTCGCGCTTCTCTTTGGCGTTACGGCGACCGTACTCGAAACCGCGGGTTTTCATCAGGAGATTTCGATGGGGCGCTTTGCGCTGGT
GAATCTCATCATGTCAGCGGCGTTCCTCGCATGGAGTCTTATTGCCTACCGTTTTCTTCCGGATCATCCCATTGCGGATGCTTCCGAGGATGCGCTGGCG
GCACGCGAGGAAACGTTTAACGCCCTTCCTGCCTGGAAAGAATATTGCACTATTGCCGCATTCGCTGTCAGCGTTATCGGCATGATGCTAATGAACATTC
TGGGAAATATCGCCTTCGTTATTCCGGGTCTTGCGGGTGCGTTTGTTCTGATGATCGATGTACTGGACTTTAAAGAAGTTCGCGATCATATGGGAGCGCC
GGTCATTTTAATGATGGCGGGGGTGATCGGTGTAGCTGATGCACTGGCGGGCACCGGCTTTACGGCGATGGTTGGCGATGCCGTTGCAGGTGTGCTCGGT
TCTGGCGTCTCACCATTTGTATTTATTGTCGCCTTTGCTTTGCTTACCAGTACCTGCGCCACCTTCACGGGTTCGAATATGGGGTCTGTTTATATTTTTG
CCCCCATCGCCATTGCCGCCTGTACCAGCCTTGGGCTTAACCCGACCGCTGCAGCGATTGCGGTGGTGATTTCAGGCTGGAACGGCGGCTATATGCCTAT
TGACGGAATGCCAGCCATGATCCTCGGAATGGGGAAATACAAACTTCCCGAATTCTGGGTGTTCTCTGTACCAATGTATCTCATCCGCATTCTGGCGCTT
TGTGCAGGCGCTGTTTTTATCTTCCCAATGTAATCTCAGACAAAAAAAGCGGCAGAGAATATCCCTGCCGCTTTTTATTGTTGGATGCGACGCTGCCGCG
TCGCATCAGGCATAAAGCAGATTACTTTTTGATTTCATACAGCGGTGTTTGACCCGCCACAACATGGCCCTGAGCTTTAATGATCAAGCCACTGAAATCG
TCGATATTGCTGCAAACCACCGGGCTAATCATCGAACGGGCGTTAGCGTTCAGGTAATCCAGATCCATTTCCAGAATCGGTTGCCCTGCGCTTACCTGCG
CGCCCTCTTCCACCAGACGTTTAAAGCCTTTACCTTCCAGCGCTACAGTGTCGATACCCATATGGACGACGATCTCCGCGCCTTTTTCGGTTTCCAGGCA
GAACGCGTGGTTGGTGTTGAAGATTTTCACGATTGTCCCTGCGGCTGGTGATACGACGATTTTATCCGTCGGTTTCACCGCCACACCGTCACCCACCGCT
TTGCTGGCGAATGCCTCGTCAGGAACCTGATCCAGTGCCACAACATCCCCGGTAATCGGCGATACCAGCTCCGCGATAGATACCGCGTTTGGTACAGCCT
GCGGTTTTGCTACAGGCGCGGCAGTTGCCGGAGTTGCTTCAGCTGACGCAGCGGCTACCGGACCACGGGCAACGACTTTCTTCATCGCATCGCCGATGGA
TTCTGCTTTCGCGCCAACAATCACCTGAATAGTCTGTTTGTTCAGTTTCACTACCCCAGAAGCACCCAGACGTTTACACATCGCATCGTTGACGCGAGCT
GAGTCAACCACGGTAAGGCGCAGACGAGTAATACAGGCGTCAATGGCTTTCAGGTTGTCAGTACCGCCAACCGCAGCAATATAGTTGGTTGCCAGTTGAT
TGAGACCTTCTTCAGTATTGCTGTTAGCCTCTTCAGTAACGATCTCGTCTTCTTTATCTTCACGACCCGGCGTTTTCAGGTTGAACATGCGGATAACCAA
ACTGAACACCACGAAGTAGATAGCGAAGAAGACAACACCCATCACCAGCAGCATCCAGACGTTCTGGCTGGCGGCCGGCAGGTTATACATCAACGCGTAG
TCGATAGCCCCCGCAGAGAAAGAGAAGCCGGCATGGATACCCAGCAGCGTTGCCACAAACAGGCTGATACCGGTCAGCAGTGCGTGCAGGAGGTACAGCA
GCGGCGCAAGGAACATGAACAGGAATTCCAGCGGCTCAGTCACACCGGTCAGGAACGCAGTAACAGCAACAGAAAGCAGCATACCGCCAACCATCGGACG
ACGCTCTTTCGGTGCTGCGAAGTACATCGCCAGCGCCGCACCCGGCAGACCGAACATCATAATCGGGAAGAAGCCGGACATGAACATCCCCGCGGTGCCG
TCACCGGCATAGAAGCGGTTGATATCACCGTGGAAAACCGTTCCCGCCGCGTTGGTGAATTCACCAATCTGGAACCAGGCGATGGTGTTCAGCACCTGAT
GCAGACCGGTTGGGATCAGCAGACGGTTGATGAAACCAAAGATACCGGAACCCAGCGCGCCCGCAGAAACGATCCACTCGCCGCCTGCATGGATAGCGTG
CTGTACCGGTGGCCAGACGTAACCAAAAATGGCCGCCAGCACCAGACAGAAGAAGCCGGTGGCGATCGGCACAAAGCGTTTGCCGCCGAAGAAGCTCAGG
AAGTCCGGCAGTTTAATATCGGACCAACGGTTATAGGCTGCGCCACCAACCAGACCGGTAATGATACCCGCCAGTACACCCATGTTAATTTCTGGGTTGA
TGGTCACCATCGCTTTGGTTAACACAAAGTAACCTACCGCACCCGCCAGTGCCGCCGCACCTGCGCTGTCTTTCGACCAGCTGGATGCCACGCCGATGGC
GAAGATTAATGCGAGGTTATCAAAAATCGCACCGCCCGCCTGGGCAATAAACGCAACGTTAAGTAAATCTGGCTGACCGAATCGCAGCAACAGCGCCGCC
ACCGGCAGCACCGCGATAGGGAGCTGTAACGCCCTACCGAGTCGCTGGAAAAAACCTAAAATATTCATCTTATTCCCCCTACGAGAACCCTATTTGGCTC
GTTTAAAGCCGTATTTTTATTTTGCTGCAAATTGTACTGCCGATGTTCTGTAATCAGATTGTTAGATCATCTGCTACAGAGTGTGTGAAAATTTAATTCG
TATCGCAAATTAAACGCGTGTCTTTTGTGAGTTTTGTCACCAAATATCGTTATCATCACTCCCTTTTACTGGCTAAACCAGAAAACTTATTTTATCATTC
AAAAAATCAGGTCGGATTGACGCCTGTCTGCGCAAATCCAGGTTACGCTTAAAGATGCCTAATCCGCCAACGGCTTACATTTTACTTATTGAGGTGAATA
ATGAGACTGATCCCCCTGACTACCGCTGAACAGGTCGGCAAATGGGCTGCTCGCCATATCGTCAATCGTATCAATGCGTTCAAACCGACTGCCGATCGTC
CGTTTGTACTGGGCCTGCCGACTGGCGGCACGCCGATGACCACCTATAAAGCGTTAGTCGAAATGCATAAAGCAGGCCAGGTCAGCTTTAAGCACGTTGT
CACCTTCAACATGGACGAATATGTCGGTCTGCCGAAAGAGCATCCGGAAAGCTACTACAGCTTTATGCACCGTAATTTCTTCGATCACGTTGATATTCCA
GCAGAAAACATCAACCTTCTCAACGGCAACGCCCCGGATATCGACGCCGAATGCCGCCAGTATGAAGAAAAATCCGTTCTTACGGAAAAATTCATCTGTT
TATGGGCGGTGTAGGTAACGACGGTCATATTGCATTTAACGAACCGGCGTCTTCTCTGGCTTCTCGTACTCGTATCAAAACCCTGACTCATGACACTCGC
GTCGCGAACTCTCGTTTCTTTGATAACGATGTTAATCAGGTGCCAAAATATGCCCTGACTGTCGGTGTTGGTACATTGCTGGATGCCGAAGAAGTGATGA
TTCTGGTGCTGGGTAGTCAGAAAGCACTGGCACTGCAGGCCGCCGTTGAAGGTTGCGTGAACCACATGTGGACCATCAGCTGTCTGCAACTGCATCCAAA
AGCGATCATGGTGTGCGATGAACCTTCCACCATGGAGCTGAAAGTTAAGACTTTAAGATATTTCAATGAATTAGAAGCAGAAAATATCAAAGGTCTGTAA
TTGTTATCCCTGCCCTGGCTCCTTGCTCAGGGCAATATTTTTAAAATCGGGGGTCAGAATGTATGCATTAACCCAGGGCCGGATCTTTACCGGCCACGAA
TTTCTTGATGACCACGCGGTTGTTATCGCTGATGGCCTGATTAAAAGCGTCTGTCCGGTAGCGGAACTGCCGCCAGAGATCGAACAACGTTCACTGAACG
GGGCCATTCTCTCCCCGGTTTTATCGATGTACAGTTAAACGGCTGCGGCGGCGTACAGTTTAACGACACCGCTGAAGCGGTCAGCGTGGAAACGCTGGAA
ATCATGCAGAAAGCCAATGAGAAATCAGGCTGTACTAACTATCTGCCGACGCTTATCACCACCAGCGATGAGCTGATGAAACAGGGCGTGCGCGTTATGC
GCGAGTACCTGGCAAAACATCCGAACCAGGCGTTGGGTCTGCATCTGGAAGGTCCGTGGCTGAATCTGGTAAAAAAGGCACCCATAATCCGAATTTTGTG
CGTAAGCCTGATGCCGCGCTGGTCGATTTCCTGTGTGAGAACGCCGACGTGATTACCAAAGTGACTCTGGCACCGGAAATGGTTCCAGCGGAAGTCATCA
GCAAACTGGCAAATGCCGGGATTGTGGTTTCTGCTGGTCACTCCAACGCGACGTTGAAAGAAGCGAAAGCCGGTTTCCGCGCGGGGATTACCTTTGCCAC
CCATCTCTACAACGCGATGCCGTATATTACCGGTCGTGAACCGGGCCTGGCGGGCGCGATCCTCGACGAAGCTGACATTTATTGCGGTATTATTGCTGAT
GGCCTGCATGTTGATTACGCCAACATTCGTAACGCTAAGCGTCTGAAAGGCGACAAATTGTGTCTGGTTACCGATGCCACCGCGCCAGCAGGTGCCAACA
TTGAACAGTTCATTTTTGCGGGTAAAACAATATACTACCGTAATGGACTTTGTGTGGATGAGAACGGTACGTTAAGCGGTTCATCCTTAACCATGATTGA
AGGCGTGCGTAATCTGGTCGAACATTGTGGTATCGCACTGGATGAAGTGCTGCGTATGGCGACGCTCTATCCGGCACGTGCGATTGGCGTTGAGAAACGT
CTCGGCACGCTCGCCGCAGGTAAAGTAGCCAACCTGACTGCATTCACACCTGATTTTAAAATCACCAGGACCATCGTTAACGGTAACGAGGTCGTAACTC
AATAAGAGAAAGTATGACACCAGGCGGACAAGCTCAGATAGGTAATGTTGATCTCGTAAAACAGCTTAACAGCGCGGCAGTTTATCGCCTGATTGACCAG
TACGGGCCAATCTCGCGGATTCAGATTGCCGAGCAAAGTCAGCTTGCCCCCGCCAGCGTAACCAAAATTACGCGTCAGCTTATCGAACGCGGGCTGATCA
AAGAAGTTGATCAGCAGGCCTCCACCGGGGGCCGCCGCGCTATCTCCATCGTCACCGAAACCCGCAATTTCCACGCAATCGGCGTACGGCTTGGTCGTCA
CGACGCCACCATCACCTTGTTTGATCTCAGCAGCAAAGTGCTGGCAGAAGAACATTACCCGCTGCCGGAACGTACCCAGCAGACGCTGGAACATGCCCTG
CTGAATGCCATTGCTCAGTTTATTGATAGCTACCAGCGCAAGCTACGCGAGCTGATCGCGATTTCGGTGATCCTGCCAGGGCTTGTAGACCCGGACAGCG
GCAAAATTCATTACATGCCGCATATTCAGGTAGAAAACTGGGGGCTGGTTGAAGCACTGGAAGAGCGTTTTAAAGTGACCTGTTTTGTCGGCCACGATAT
CCGCAGTCTGGCGCTGGCAGAGCACTACTTCGGTGCAAGTCAGGATTGCGAAGACTCCATTCTGGTGCGTGTCCATCGCGGAACCGGGGCCGGGATTATC
TCTAACGGGCGAATTTTTATCGGGCGCAACGGCAACGTCGGTGAAATTGGCCATATTCAGGTCGAACCGCTGGGTGAACGCTGCCACTGCGGCAACTTTG
GCTGCCTGGAAACTATCGCCGCCAATGCTGCCATTGAACAACGGGTGTTGAATCTGTTAAAGCAGGGCTACCAGAGCCGTGTGCCACTGGACGACTGCAC
CATCAAAACTATCTGCAAAGCCGCGAACAAAGGCGATAGCCTGGCCTCGGAAGTGATTGAATATGTCGGTCGTCATCTGGGTAAAACCATCGCCATTGCT
ATCAACTTATTTAATCCGCAAAAAATTGTTATTGCTGGAGAAATCACCGAAGCCGATAAAGTGCTGCTCCCTGCTATTGAAAGCTGCATTAATACCCAGG
CGCTGAAGGCGTTTCGTACTAATCTACCGGTGGTACGTTCTGAGTTGGATCACCGCTCGGCAATCGGCGCTTTTGCGCTGGTAAAACGCGCCATGCTCAA
CGGTATTTTGCTCCAGCATTTGCTGGAAAATTAATGTGCTTTTATAGTGGCGCTTATTGTTGTCAATATTCTGGGTAGTCCATGACCATTAAAAATGTAA
TTTGCGATATCGACGGCGTGCTGATGCACGATAACGTCGCCGTACCGGGTGCAGCGGAATTTTTGCACGGGATTATGGATAAAGGCCTGCCGCTGGTGTT
GCTGACCAACTATCCTTCGCAGACCGGGCAAGATCTGGCGAACCGCTTTGCCACTGCTGGTGTCGATGTACCGGATAGCGTGTTTTATACCTCCGCGATG
GCGACCGCCGATTTCCTGCGTCGCCAGGAAGGCAAGAAAGCGTATGTGGTGGGCGAAGGCGCACTGATTCATGAACTGTACAAAGCCGGTTTCACTATTA
CCGATGTGAACCCTGATTTTGTGATTGTTGGCGAAACGCGTTCCTACAACTGGGACATGATGCATAAAGCAGCCTATTTCGTCGCTAACGGTGCACGTTT
TATCGCCACCAACCCGGACACCCACGGGCGCGGTTTTTATCCCGCCTGTGGCGCGTTGTGTGCAGGGATCGAGAAAATCTCCGGGCGCAAACCGTTCTAT
GTTGGAAAGCCGAGTCCGTGGATCATCCGCGCGGCATTAAACAAAATGCAGGCGCATTCGGAAGAAACGGTGATTGTCGGCGATAACTTGCGTACCGATA
TTCTGGCGGGCTTCCAGGCCGGTCTGGAGACGATTCTGGTGCTTTCTGGTGTTTCGTCGCTCGACGATATCGACAGTATGCCGTTCCGCCCAAGTTGGAT
TTACCCATCGGTCGCTGAAATCGACGTTATCTGAATAGCAACCACGCCTCAAGGCGTGGTTTCTTATTTTTACCCATCATTAAAATCACCCTATTCAATA
AAACCCGTCAAAAATTATCGATCCATCAATAAATACGCCACCATACCCTATCCTTTTTTACAAATCAGCAATCGCCATTACGTTTTTTATTTTTCCACCG
CCAAATCGCTTGCGCACAGTGCTGCTTTGCGGCATTTTTTTAAACAAGCAAACACAACAAGCAACAAATACCAGGTTAACGGAGAAGGTTATGTGTTCAA
TTTTTGGCGTATTCGATATCAAAACAGACGCAGTTGAGCTGCGTAAGAAAGCACTCGAGCTGTCACGCCTGATGCGTCATCGTGGCCCGGACTGGTCCGG
TATTTATGCCAGCGATAACGCCATCCTCGCCCACGAACGTCTGTCAATTGTTGACGTTAACGCGGGGGCGCAACCTCTCTACAACCAACAAAAAACTCAT
GTGCTGGCAGTAAACGGTGAAATCTACAACCACCAGGCATTGCGCGCTGAATATGGCGATCGTTACCAGTTCCAGACCGGGTCTGACTGTGAAGTGATCC
TCGCGCTGTATCAGGAAAAAGGGCCGGAATTTCTCGACGACTTGCAGGGCATGTTTGCCTTTGCCCTGTACGACAGCGAAAAAGATGCATATCTGATTGG
TCGCGACCATCTGGGGATCATCCCACTGTATATGGGCTATGACGAACACGGTCAGCTGTATGTGGCCTCAGAAATGAAAGCCCTCGTGCCAGTTTGCCGC
ACGATTAAAGAGTTTCCGGCGGGGAGCTATTTGTGGAGTCAGGACGGCGAAATCCGTTCTTATTATCATCGCGACTGGTTCGACTACGATGCGGTGAAAG
ATAACGTGACCGACAAAAACGAGCTGCGTCAGGCACTGGAAGATTCCGTTAAAAGCCATCTGATGTCTGATGTGCCTTACGGTGTGCTGCTTTCTGGTGG
TCTGGATTCCTCAATTATTTCCGCTATCACCAAGAAATACGCCGCCCGTCGCGTGGAAGATCAGGAACGCTCTGAAGCCTGGTGGCCGCAGTTGCACTCT
TTTGCTGTAGGTCTGCCGGGTTCACCGGATCTGAAAGCCGCCCAGGAAGTGGCAAACCATCTTGGCACGGTGCATCACGAAATTCACTTCACTGTACAGG
AAGGTCTGGATGCCATCCGCGACGTGATTTACCACATCGAAACTTATGATGTGACCACTATTCGCGCTTCAACACCGATGTATTTAATGTCGCGTAAGAT
CAAGGCGATGGGCATTAAAATGGTGCTGTCCGGTGAAGGTTCTGACGAAGTGTTTGGCGGTTATCTATACTTCCACAAAGCGCCGAACGCTAAAGAGTTG
CATGAAGAGACGGTGCGTAAACTGCTGGCCCTGCATATGTATGACTGCGCGCGTGCCAACAAAGCGATGTCAGCCTGGGGCGTGGAAGCACGCGTTCCGT
TCCTCGACAAAAAATTCCTTGATGTGGCGATGCGCATTAACCCACAGGATAAAATGTGCGGTAACGGCAAAATGGAAAAACACATCCTGCGTGAATGTTT
TGAAGCGTATCTGCCTGCAAGCGTGGCCTGGCGGCAAAAAGAGCAGTTCTCCGATGGCGTCGGTTACAGTTGGATCGACACCCTGAAAGAAGTGGCAGCG
CAGCAGGTTTCTGATCAACAGCTGGAAACTGCCCGCTTCCGCTTCCCGTTCAACACGCCGACCTCAAAAGAAGCGTATCTGTACCGGGAGATCTTTGAAG
AATTGTTCCCGCTTCCGAGCGCCGCTGAGTGCGTGCCGGGCGGTCCTTCCGTCGCTTGTTCTTCCGCTAAAGCGATTGAGTGGGATGAAGCGTTCAAGAA
AATGGACGATCCGTCTGGTCGCGCGGTTGGCGTTCACCAGTCGGCATATAAATAAGACGTGTAATATTGCCCCGGAGAAATCCGGGGCAATTTCAGTTAC
TGGGGCGCTTGTTGATTCTGATATGCAGTAAGGAAATGTTCCGGGTTTGCCACATCGCTGTTTGACAACTCATTACTGTAGGCCAGTATTTCATAGATTA
ATTTCCCACCACTATTGTTGAATTCCGAATTTCATCCTGTATGACAAAAGAATGGCTGTAGGGTGGGGAAAAAACACAAAGTAAACAATAATTGACGAAT
ATAGCGCCATGCTGTTCGCAACCTAACCAAACAGTCACTTTCGAGCAATTTTCCTTGAAAAAGAGGTTGACGCTGCAAGGCTCTATACGCATAATGCGCC
CCGCAACGCCGATAAGGTATCGCGAAAAAAGATGGCTACGTAGCTCAGTTGGTTAGAGCACATCACTCATAATGATGGGGTCACAGGTTCGAATCCCGTC
GTAGCCACCATCTTTTTTGCGGGAGTGGCGAAATTGGTAGACGCACCAGATTTAGGTTCTGGCGCCGCAAGGTGTGCGAGTTCAAGTCTCGCCTCCCGCA
CCATTCACCAGAAAGCGTTGTACGGATGGGGTATCGCCAAGCGGTAAGGCACCGGTTTTTGATACCGGCATTCCCTGGTTCGAATCCAGGTACCCCAGCC
ATATTCTTCGAATAAGCGGTTCAGCGCCCGGTTATTGGGGTATCGCCAAGCGGTAAGGCACCGGTTTTTGATACCGGCATTCCCTGGTTCGAATCCAGGT
ACCCCAGCCATCGAAGAAACAATCTGGCTACGTAGCTCAGTTGGTTAGAGCACATCACTCATAATGATGGGGTCACAGGTTCGAATCCCGTCGTAGCCAC
CAAATTCTGAATGTGTCGAATATGTTCGGCAAATTCAAAAACCAATTTGTTGGGGTATCGCCAAGCGGTAAGGCACCGGATTCTGATTCCGGCATTCCGA
GGTTCGAATCCTCGTACCCCAGCCACATTAAAAAAGCTCGCTTCGGCGAGCTTTTTGCTTTTCTGCGTATATTCAATGCCGAATGCGATGTTGACTCGTC
TTATCCTTCAAAGTCGGATGCGACGCTGCCGCGTCTTATCCGACCTACGGTTGGCATGCATCCAGCAATGTTGTGAGGCTACAACCCTAACGCATATTTC
AGCGCCTTACGTTTCAACACGCCAGCACGCTCCGCCGCCATCAAACCAAGATTACGCACAAAACGCAGCGGTGGCAGATTATTGCTGAATCCGGCATAAA
ACAGATCCATACCACTTTGCATCATGAAGTTATCCGCCATACGCCGCATCTGGTAACGCTTGAGCACAGGATAACTGGCCCACGCTTCGCCGTAGCTGCG
GGCGTTCACCAGAACGTCAATCAGGGCATCGACATCACGATAACCAAGATTCACTCCCTGTCCCGCCAGCGGATGGATGGTATGCGCGGCATCGCCCACC
AGAGCAAGCCCTGGTTGCACATACTGCAACGCATGGCGACGTATCAGCGGAAACGCACCAGCGGCAAGCGGTGTCACGTAACCCAGACGCGACGGGAAAT
GCTTCGCGATTTCCGCCTGTAGCTGCGCCATATTCATATTCTGCAACTGGCGAATGCGCGCCGGAGAGTCATACCACACCAGCGATGCCCAGTTATCAAA
CAACGGCAGAAACGCACGCGGTCCGTCCGGGGTAAATTGCTGCCAGGTGCTGTCGCCGGGATCGTTCTCACACTGTACGCTAATCAACATACACGACTGC
GCATACTGCCAGGCATGAACGCCAATTCCCGCCATCTGTCGCACCTGCGAATTTGCGCCGTCGGCACCAATCACCAGCTTCGCGAGGATCGTTTCACCGC
CCTTCAGTTCCAGCTCCTGAAGATCATTATGGCGATGCTGTGCAATCAGCGAGCCTGGCACACGTAACGTTACTTTCGGATGCGCTTCCAGCGCCTGCCA
CAACGCCTGTTGCAGGACAGTGTTTTCCACCATGTAGCCAAGCAACGGTAGCTTAAGTTCAGCGGCGTCAAACACGACATGCGCCGTTTCCCACTCCCAC
GTTTCCAGTCTGCGGTAAGGATGGCAACGCATAGCCTGTACTGCATCCCAGACCCCTACCCCTTTAAGCAATGATACCGAAGCCGCGCTGATCGCCGAGA
TCCGCACGTCCGGCTGGCTGTCCGCAACAAACGGCGCAGGCTGGGCATGTTCAATAACCGTTACCGTAAACCCGTGCTGTGCCAGTCCCAGCGCCAGTGC
GCCGCCGACCATTCCTCCGCCGACAATGGCAATTTCCGTTGGTTGATTTGTCATGGTCAATCATCCTGTTAGCAATATGCTTTAAGTTTACAGGATTTTT
ACCCCCAAGGGCTGATAACGCTCATACTGGTCACAACGGCAGCAAAGCATTACACTATGCGCCCTGCATTCCTGGCTACTATTTCGCAAGAGCAAGTCGA
TGACCAAAAAACTCCATATTAAAACCTGGGGCTGTCAGATGAACGAGTACGATTCATCGAAGATGGCCGATCTGCTGGATGCCACCCACGGCTATCAACT
GACCGACGTGGCGGAAGAAGCGGATGTGCTGCTGCTGAACACCTGCTCAATCCGCGAGAAGGCTCAGGAAAAAGTCTTCCATCAGTTGGGTCGCTGGAAA
CTGTTAAAAGAGAAGAATCCAGACCTGATTATCGGCGTCGGCGGCTGCGTGGCATCGCAAGAAGGCGAGCACATTCGCCAGCGCGCCCACTATGTCGATA
TTATTTTTGGGCCGCAAACGCTGCACCGCCTGCCGGAGATGATCAACTCCGTGCGCGGCGACCGCAGCCCGGTTGTAGATATCAGCTTCCCGGAAATCGA
GAAGTTTGACCGTCTGCCAGAACCGCGCGCCGAAGGGCCGACCGCGTTTGTCTCCATTATGGAAGGCTGCAATAAATATTGCACCTACTGCGTGGTGCCT
TACACCCGTGGTGAAGAGGTAAGCCGTCCGTCCGACGATATTCTGTTTGAGATCGCCCAGCTTGCGGCTCAGGGCGTGCGTGAAGTCAACCTGCTCGGTC
AGAATGTGAATGCCTGGCGTGGTGAGAACTACGACGGCACCACCGGAACGTTTGCCGATCTGCTGCGTCTGGTTGCCGCCATCGACGGGATCGATCGTAT
TCGCTTTACCACCAGCCATCCGATCGAATTCACCGACGATATCATCGAAGTGTATCGCGACACGCCGGAGCTGGTGAGCTTCCTGCACCTGCCGGTACAG
AGCGGTTCCGATCGCATTCTGAACCTGATGGGCCGTACTCACACGGCGCTGGAGTACAAAGCGATCATCCGTAAACTGCGTGCGGCGCGTCCGGATATTC
AGATCAGTTCTGACTTCATCGTTGGCTTCCCTGGCGAAACCACCGACGACTTCGAGAAAACGATGAAGCTGATTGCCGACGTCAATTTCGACATGAGCTA
CAGCTTTATCTTCTCTGCACGTCCGGGTACACCAGCCGCCGATATGGTTGATGATGTTCCGGAAGAAGAGAAGAAGCAGCGTCTGTATATTCTGCAAGAG
CGCATTAATCAGCAAGCGATGGCATGGAGCCGCCGGATGCTCGGCACCACCCAGCGCATTCTGGTAGAAGGGACTTCACGTAAGAGCATCATGGAGCTTT
CCGGTCGCACTGAAAATAACCGCGTGGTTAACTTCGAGGGCACACCGGATATGATCGGTAAATTCGTCGATGTAGAAATTACCGACGTCTACCCGAACTC
TCTGCGCGGTAAAGTGGTGCGAACTGAAGATGAAATGGGTCTGCGCGTGGCAGAAACACCGGAATCGGTGATTGCCCGTACCCGCAAAGAAAACGACCTT
GGCGTGGGTTATTATCAGCCGTAATTCTCAGGCCCGCCGTTCCGGTGGGCCTTGTTTTTCTCTCTTTATCCCCATCTTTATCGCAATGCTTGCGCCTTTT
TCCTGTGGCGCGAATAATTTCCTTATAGGCCGGTGAATGTTCAGCTTCCGGCGGCATACAGATAAGAGGAACGGTTTGAACATAGACACTCGCGAAATCA
CTCTGGAGCCAGCAGACAACGCACGTCTGTTGAGCCTGTGCGGCCCGTTTGATGACAACATCAAACAACTCGAACGCCGTCTCGGCATCGAGATCAATCG
CCGCGATAACCACTTTAAACTGACCGGCCGTCCGATTTGCGTCACCGCTGCGGCAGACATTCTGCGTAGCCTGTATGTCGATACTGCCCCGATGCGCGGT
CAGATTCAGGATATCGAACCGGAACAGATCCACCTTGCGATTAAAGAAGCGCGGGTACTGGAGCAAAGCGCGGAGAGCGTGCCGGAGTACGGCAAAGCAG
TCAATATCAAAACCAAACGCGGCGTAATTAAGCCGCGCACGCCAAACCAGGCGCAGTACATCGCCAATATTCTCGACCATGACATTACCTTCGGCGTTGG
CCCGGCGGGTACGGGTAAAACCTACCTGGCAGTGGCTGCGGCAGTTGATGCCCTGGAGCGTCAGGAAATTCGCCGTATTCTGCTGACTCGTCCGGCGGTC
GAAGCCGGTGAGAAACTGGGCTTCCTGCCTGGCGATTTAAGCCAGAAAGTAGACCCGTATCTGCGCCCGCTGTACGACGCGCTGTTTGAAATGCTGGGCT
TTGAGAAAGTCGAGAAACTGATTGAGCGCAACGTTATTGAAGTCGCACCGCTGGCCTATATGCGTGGTCGTACGCTGAACGACGCGTTTATCATTCTTGA
TGAGAGCCAGAACACTACCATCGAACAGATGAAGATGTTCCTGACCCGTATCGGTTTTAACTCAAAAGCGGTTATCACCGGCGACGTCACACAGATCGAC
CTGCCGCGTAATACCAAGTCTGGTTTGCGTCATGCCATCGAAGTGCTGGCTGATGTCGAAGAGATCAGCTTTAACTTCTTCCACAGCGAAGACGTGGTTC
GTCACCCGGTGGTGGCGCGTATCGTTAACGCCTATGAAGCCTGGGAAGAAGCCGAACAAAAACGTAAAGCGGCGCTGGCAGCAGAACGCAAGCGCGAAGA
ACAGGAACAAAAATGAGTCAGGTGATCCTCGATTTACAACTGGCATGTGAAGATAATTCCGGGTTACCGGAAGAGAGCCAGTTTCAAACATGGCTGAATG
CGGTGATCCCGCAGTTTCAGGAAGAATCGGAAGTGACTATTCGCGTGGTCGATACCGCCGAAAGCCACAGTCTGAATCTGACCTATCGCGGTAAGGATAA
GCCGACCAACGTGCTCTCCTTCCCGTTTGAAGTGCCGCCTGGCATGGAAATGTCGCTACTGGGCGATCTGGTTATCTGCCGTCAGGTGGTTGAGAAGGAA
GCTCAGGAGCAAGGCAAACCACTGGAGGCGCACTGGGCGCATATGGTGGTGCACGGCAGTCTGCATTTGTTAGGTTACGATCACATCGAAGATGACGAAG
CAGAAGAAATGGAAGCCATCGAAACAGAGATTATGCTTGCTCTGGGCTATGAGGATCCGTACATTGCCGAGAAAGAATAATTTGCCAGGCATTTGACTGG
CAGACGTCCCCGCCGTTGGTGATTAACGACGGCGTTTTGATTAACTAACATGAGAACCCATACGACGCCATGAGCGACGACAATTCACACAGTAGTGACA
CGATAAGCAACAAGAAGGGATTTTTCTCCCTGTTACTCAGCCAACTTTTCCACGGTGAACCGAAAAACCGTGACGAACTGCTGGCGCTGATCCGTGATTC
CGGGCAGAACGACCTTATCGACGAAGATACGCGCGATATGCTCGAAGGGGTGATGGACATCGCAGACCAACGCGTTCGCGACATCATGATCCCCGCTCCC
AGATGATTACCCTGAAACGCAACCAGACGCTGGACGAATGCCTTGATGTCATCATCGAGTCCGCCCACTCACGTTTCCCGGTGATTAGCGAAGACAAAGA
TCACATTGAAGGGATTCTGATGGCGAAAGACTTGCTGCCGTTTATGCGCAGCGATGCTGAAGCCTTCAGCATGGACAAAGTGTTACGTCAGGCGGTTGTC
GTTCCTGAAAGTAAGCGCGTAGACCGGATGCTGAAAGAGTTTCGCTCTCAGCGTTACCACATGGCGATCGTCATTGACGAATTCGGCGGGGTTTCCGGTC
TGGTGACCATTGAAGACATCCTGGAACTGATTGTTGGTGAGATTGAAGACGAGTATGACGAAGAAGATGATATCGACTTCCGTCAGCTGAGTCGTCATAC
CTGGACCGTGCGCGCACTGGCTTCTATTGAAGACTTCAACGAAGCGTTCGGCACCCACTTTAGCGATGAAGAGGTTGACACTATCGGTGGTCTGGTGATG
CAGGCATTTGGGCATCTTCCGGCGCGTGGCGAAACCATCGACATCGACGGTTACCAGTTCAAAGTGGCGATGGCCGACAGTCGGCGTATTATTCAGGTTC
ATGTCAAAATCCCGGATGACTCACCCCAGCCGAAGCTGGATGAATAAAACCGAAACTGGATAGATAACTACATGGCTTTTGCCTCATTAATTGAACGCCA
GCGCATTCGCCTGCTGCTGGCGTTATTATTCGGTGCCTGCGGAACGCTGGCCTTCTCTCCTTACGATGTCTGGCCTGCGGCGATTATTTCGCTGATGGGG
CTTCAGGCGTTGACCTTTAACCGCCGTCCACTCCAGTCTGCCGCTATTGGCTTTTGCTGGGGATTTGGCCTCTTTGGCAGCGGTATTAACTGGGTCTATG
TCAGCATCGCGACCTTTGGCGGAATGCCTGGCCCGGTTAACATCTTCCTGGTGGTACTGCTGGCGGCGTATTTGTCGCTGTATACCGGACTGTTTGCTGG
CGTGCTGTCGCGTCTGTGGCCGAAAACCACCTGGCTGCGCGTGGCGATTGCCGCCCCTGCTCTCTGGCAAGTGACCGAGTTTCTGCGCGGTTGGGTACTG
ACAGGCTTCCCGTGGTTACAGTTCGGCTATAGCCAGATTGATGGCCCGTTAAAAGGGCTGGCACCGATAATGGGCGTGGAAGCCATTAACTTCCTGCTGA
TGATGGTTAGCGGCCTGCTGGCACTGGCGTTGGTCAAACGCAACTGGCGTCCGCTGGTGGTGGCCGTCGTGCTGTTTGCCCTTCCCTTCCCGCTGCGTTA
CATCCAGTGGTTTACCCCGCAACCGGAAAAACTATTCAGGTTTCGATGGTTCAGGGCGATATTCCGCAATCGCTGAAATGGGACGGAGACCAGCTACTTA
ATACGCTGAAGATTTACTACAACGCAACGGCACCGCTGATGGGCAAATCATCGTTGATTATCTGGCCGGAGTCGGCGATAACCGATCTGGAAATTAATCA
GCAACCGTTCCTCAAAGCACTGGACGGTGAGTTGCGCGATAAAGGTAGCTCGCTGGTCACCGGGATTGTCGACGCGCGTCTCAATAAGCAGAACCGCTAC
GATACCTACAACACCATCATCACACTGGGTAAAGGTGCACCGTACAGCTACGAATCAGCCGATCGCTATAACAAAAACCATCTGGTGCCGTTTGGCGAGT
TTGTCCCACTGGAGTCGATTCTGCGTCCGTTAGCACCGTTCTTTGATTTGCCGATGTCGTCATTCAGCCGCGGACCATATATTCAGCCACCGCTGTCGTT
GAATGGCATTCAACTTACTGCGGCCATTTGCTACGAAATCATTCTCGGCGAGCAAGTGCGCGATAACTTCCGCCCGGATACCGACTATCTGCTGACTATC
TCCAACGATGCGTGGTTTGGTAAGTCTATTGGTCCATGGCAGCACTTCCAGATGGCGCGAATGCGTGCGCTGGAGCTGGCGCGCCCACTGTTGCGCAGCA
CCAACAACGGCATTACGGCGGTGATTGGCCCGCAGGGTGAGATTCAGGCGATGATCCCGCAGTTCACCCGCGAGGTGTTAACCACTAACGTAACGCCGAC
CACCGGACTCACCCCGTACGCACGTACCGGCAACTGGCCACTGTGGGTGCTGACGGCACTGTTTGGTTTTGCAGCTGTGCTGATGAGTCTGCGTCAGCGA
CGTAAACGTTGATGTGAATGATGCGCTGGCCTGCAAAATTGCATCAATTTTGCAGGCCAGATAAACCGTTCACACCGCATCCGGTATCAACAAAACATAC
TTTCTCATTGAGTTGTGGGGCATGATTATCATGCCCCTTTTTCTTACGTTTCAGGGATACAAGCCACATCGCCATATTGGGGATGCCGAATAATTGCCTG
CGGATCAATCGAGCGCGTCCTGTCCATTTGGATTAACCTGTTCTTCGCCATAACAAATATCTTTCTACCATCCGCTGAAAAACGAAGATTATTAACGTAG
CTGGCAGGATAAACGCCAATAATCTGCCCGGCATTAATATTGAGCAGGATGACATAACCTTGCAGGCCATATGACACCAACGCTAAATACTGACCGTCCG
GGCTAATACCCTCAACGGAATAAACGCTCCTGCGACACCATTGCGTCATAATGCTGGCTTGTTGATCCTCTGCTCTTATACGTGAAATCCCCTGGCTATC
GGCAAAAATAACCTCACCATTTTTTGGTCGGAATCCCATCGCAGAAACGACACCACGCGCATTACCTGCGGGAAAGTCTTCTTTCTGATGCGTGATGGTA
TTGAACCGCACGATGTTACCTCTGCCTGCTCCCGGAACCAGTAATGTTTTTTCATCCGGGGAAAGTGCCATAACCCAGGCGCCTGGTTTACCGCTCATCC
CCGTCCCGTCGTATTTCTCCAGCGGGATATCCGCCACATGCTGATAAGCCACCAGATCAATCGCTGACACACTATTGCTGGTGCGATTCATCACCCAGGC
TTTTGTGCCATCACACGAGAGGATAAGGCTGTCAGGATGTGCGCCGGTGGTAATCGACTGAATAATCTCCCCGTCGCCACGTTAATGACCGATAACGCAT
TCGCTTCAAATGAAGTCGCATAAATCAACTTTTCATCCAGGCTTAATGCCATCGATCTGACGCCCTGATCTTTACAGCCACCACAATGTTTGACTGACTT
TTCTTTCGCTATGGGCGCTGTAAAGGTATGCAGGATTTTCTTTTGTCCGAGGTCGAAAACAACAATGCTGTTCGTGTTTTCAATTGCGGCATACAACGTA
TTAGCATCCCGACTGATCGCCATATCATGGATATCGGCAATCTCAGCGAGTAAATCACCACTGGCCTGCTCACGACTTACCGGAGCGGATAATGTTTCCC
TGAGGGCGTTGCGCTCCTCCACTAACTGCTGCTTTTTTTGTCGTCGCTCTTGTTCAATCTCCTGCGGATAAAACGCTTCACGCAGGCTTTGCCTGACCTG
TAAAACTGATTCATCAATCTGCTGCTGCACAAGCCAGATAGTCCCGGTCAGAAGAAGAGTGACCGCAACAATAATCCCGCCTTCCGTAACGAGCCGATTT
TGCCCAACTAAACGCGCACTCAGCCAACCCAACGCGCCCCCGCAATCAGGCCGCCAATGTGGCAAGCGTTATCTATTCCTGTTTGCCGGGTACCATACAA
CAGTGTCAGCGCCACCATACCCAACAGAGGAAATACTCGCCGCTGGTTTTTATGGTGTGTGCCCGCACCTGAAGCAAGCTGTGTTGCTATCGCAGCGCCC
GCTATTCCCATAATTGCCCCGGATGCCCCAACGCTGATGACTATCTGCTCACTTTCGCGTAACGCATAACAGGCGCTGATCAGCCCACCAAAGATGCCGG
AGAATAACCAGATAATCAGGAGTCGCCATTTCCCCAGTATCCGTTCCGCTACTGTCCCCACCGCCAGGAGTGCAAACATATTCATCAGCAAATGGGAAAA
ACTACTGTGCAGAAAGACACTGCTCAATAAGCGCCAGGGTTCACCCGACAACGTGAGAGAGGCAACGTTAGCGCCGAGATGGATGAGTGCGGATTGATCG
ACTTCTTCGTAACTCATCCATTGTGCGAGGTAACAAAATATCCCAACACAGAGCGCAAAAAGGATCAGGGTTATTGCGGGTAATTGAACATTTAACGGCT
TAACCGAAGATGCAGACATAAGGTGATTCTTCCTTGAAAAGACTAGTAAAAAGCATTTTCCCGTGTGTAGTTATCATCCCGGCAAACGTCCCACACCGAA
AAGTTAACACTGTCCGAAATATGACTTTTTCAAACTGAAATTACAATCGTAATTAATTCACCCCTAAGTATTTTTTGGCATGTAAGTTGCTTTATTTACT
GTGTAAGCAATGAAATCAGCCGCAACGCAACCGGGTTGCACCACCACAAATCAGCGGTAGCACCAAAAAGGTGCGGTTTAAGAATTTTGCTTCGGAATGG
TGCGGCGCACCTCGCAAAAATAAACAATAAAACATCAATATCTTTACATTTATCCAAACTAAATGTTACCTAACAAACACAACACTGCACAATAAAGTCG
CAGATGATAACAACACAAACACTCACAACGGGTATCCATGCGTTTTTAACGCAGAAGATAAAGGAGTTGGATATGCAATTACGTAAACCTGCCACAGCAA
TCCTGGCCCTGGCGCTTTCCGCAGGACTGGCACAGGCAGATGACGCCGCCCCGGCAGCAGGCAGCACGCTGGACAAAATCGCCAAAAACGGCGTGATTGT
CGTCGGTCACCGTGAATCTTCAGTACCTTTCTCTTATTACGACAATCAGCAAAAAGTGGTGGGCTACTCGCAGGATTACTCCAACGCCATTGTTGAAGCA
GTGAAAAAGAAACTCAACAAACCAGACTTACAGGTGAAATTGATTCCGATCACCTCACAAAACCGTATTCCACTGCTGCAAAACGGCACTTTCGATTTTG
AATGCGGTTCTACCACCAACAATGCCGAACGCCAAAAACAGGCGGCTTTCTCTGACACTATTTTCGTGGTCGGTACGCGCCTGCTGACCAAAAAGGGCGG
CGATATCAAAGATTTTGCCGACCTGAAAGGCAAAGCCGTAGTCGTCACTTCCGGCACCACCTCTGAAGTTTTGCTCAACAAACTGAATGAAGAGCAAAAA
ATGAATATGCGCATCATCAGCGCCAAAGATCACGGTGACTCTTTCCGTACCCTGGAAAGCGGTCGTGCCGTTGCCTTTATGATGGATGATGCTCTGCTGG
CCGGTGAACGTGCGAAAGCGAAGAAACCAGACAACTGGGAAATCGTCGGCAAGCCGCAGTCTCAGGAAGCCTATGGTTGCATGTTGCGTAAAGACGATCC
GCAGTTCAAAAAGCTGATGGATGATACCATCGCTCAGGTGCAGACCTCCGGTGAAGCGGAAAAATGGTTTGATAAGTGGTTCAAAAATCCAATTCCGCCG
AAAAACCTGAACATGAATTTCGAACTGTCAGACGAAATGAAAGCACTGTTCAAAGAACCGAATGACAAGGCACTGAACTAATTACAAGAACCAGGGGCGG
AAATTCCAGCCCTCTCGATTGTTACGTAGCACGGACAGACTATACGCCTGGTGGTCGTTCCCCATCGGGCCTGAAAACCGCAATACGCTGGGTAACAATC
TTCGAGGGTAGCAGTTAACGCTGCTACCCTCTTTTTCTGGAGTAGATTTATGTCTATAGACTGGAACTGGGGTATTTTTTTACAACAAGCCCCGTTCGGC
AACACCACCTATCTTGGTTGGATCTGGAGTGGCTTTCAGGTGACGATCGCTTTGTCGATCTGCGCCTGGATTATCGCTTTCCTCGTCGGTTCATTTTTCG
GCATTTTACGTACCGTTCCAAACCGTTTTCTCTCCGGTCTGGGTACGTTGTATGTCGAACTGTTCCGCAACGTGCCGTTGATTGTGCAATTCTTTACCTG
GTACCTGGTGATCCCGGAGCTGCTGCCAGAGAAAATCGGCATGTGGTTTAAGGCAGAGCTGGATCCTAATATTCAATTTTTCCTTTCATCCATACTCTGC
CTGGGGCTGTTTACCGCCGCCCGTGTTTGCGAACAGGTACGCGCCGCTATTCAGTCGCTGCCGCGTGGGCAAAAAATGCCGCGCTGGCGATGGGTCTGAC
GCTACCGCAGGCTTACCGCTACGTACTGCTGCCTAATGCTTATCGCGTTATCGTCCCGCCGATGACCTCCGAGATGATGAACCTGGTGAAAAACTCGGCC
ATCGCCTCGACTATCGGCCTGGTAGATATGGCGGCGCAGGCGGGTAAATTACTCGATTACTCCGCTCACGCCTGGGAGTCGTTTACCGCCATTACGCTTG
CGTATGTGTTGATTAACGCTTTTATCATGCTGGTGATGACGCTGGTTGAACGTAAAGTTCGCCTGCCCGGCAACATGGGGGCAAATAATGTACGAGTTTG
ACTGGAGTTCCATTGTCCCTTCCCTGCCATATCTGCTGGATGGGCTGGTGATCACCCTGAAAATCACCGTCACGGCAGTGGTGATTGGTATTTTGTGGGG
CACCATGCTGGCGGTGATGCGCTTGTCCAGCTTTGCGCCCGTAGCGTGGTTTGCCAAAGCCTACGTTAACGTATTCCGCTCGATTCCTTTAGTTATGGTT
TTGCTGTGGTTTTACCTGATCGTACCGGGTTTTCTGCAAAACGTGCTGGGATTATCACCAAAAAATGATATCCGTTTAATTTCGGCGATGGTGGCGTTTT
CGATGTTTGAAGCGGCGTACTATTCAGAGATTATCCGTGCTGGTATTCAAAGTATTTCTCGTGGTCAGTCGAGCGCCGCGCTGGCGTTGGGAATGACTCA
CTGGCAGTCGATGAAACTGATTATTCTGCCGCAGGCGTTCCGCGCGATGGTGCCGCTGTTGCTCACTCAGGGCATCGTACTGTTTCAAGATACCTCACTG
GTGTATGTGTTATCTCTGGCCGATTTCTTCCGTACCGCCTCAACCATTGGTGAGCGTGATGGTACGCAGGTTGAGATGATCCTGTTTGCCGGATTTGTTT
ATTTCGTTATTAGCCTTAGCGCGTCGTTGTTGGTCAGCTACTTGAAAAGAAGGACAGCATAATGATTACCCTGAAAAATGTTTCAAAATGGTATGGTCAC
TTTCAGGTGCTGACCGACTGCTCAACCGAAGTGAAAAAAGGCGAAGTTGTGGTGGTTTGCGGTCCGTCTGGTTCCGGCAAATCAACGCTGATTAAAACCG
TCAACGGGCTCGAACCGGTGCAGCAAGGTGAAATCACCGTCGATGGCATCGTGGTTAACGACAAGAAAACCGATCTGGCGAAACTGCGTTCCCGCGTCGG
GATGGTGTTTCAGCATTTCGAGCTGTTCCCCCATCTGTCGATTATCGAAAACCTGACCCTGGCGCAGGTGAAAGTGCTTAAACGCAATAAAGCGCCGGCT
CGTGAAAAAGCATTGAAATTGCTGGAGCGCGTCGGGCTTTCCGCACATGCCAATAAGTTTCCGGCGCAGCTTTCCGGCGGCCAGCAGCAGCGTGTGGCGA
TCGCTCGCGCATTGTGCATGGATCCTATTGCCATGCTGTTCGACGAACCAACGTCGGCGCTGGATCCGGAGATGATCAACGAAGTGCTGGACGTGATGGT
CGAACTGGCGAACGAAGGAATGACGATGATGGTGGTGACCCACGAAATGGGCTTTGCCCGTAAAGTGGCGAATCGGGTGATCTTTATGGACGAGGGTAAA
ATTGTCGAAGACTCGCCGAAAGACGCTTTCTTCGATGATCCGAAATCGGACCGCGCAAAAGACTTCCTCGCAAAAATCCTGCATTAATCACTCTGGCGCG
CATACTCAATTGCGCGCCATCTCACGCTTTCTCGTTTCTTCCCTCGTATCTGTTACATCCCGGCGTTACCCTTGTCGCAAAGAAACACACAACAAGGAGC
AACAATGGCACTGCCAATTCTGTTAGATTGCGACCCAGGTCATGACGACGCTATCGCAATCGTTCTCGCCCTCGCCTCACCAGAGCTTGATGTCAAAGCA
ATTACGTCTTCCGCCGGAAACCAGACACCAGAAAAACCTTACGCAATGTTCTGCGTATGCTGACCTTGCTTAATCGCACCGATATTCCGGTAGCAAGCGG
TGCGGTAAAACCGTTAATGCGTAATTTGATTATTGCGGACAACGTGCACGGCGAAAGCGGCCTGGACGGCCCGGCATTGCCGGAACCGGCATTTGCACCG
CAAAACTGTACGGCGGTGGAGCTGATGGCGAAAACGCTGCGTGAAAGTGAGGAACCTGTCACCATTGTTTCTACCGGACCGCAAACTAACGTTGCCTTGC
TGCTCAATAGCCACCCGGAACTGCATAGCAAAATTGCCCGTATCGTGATTATGGGCGGCGCAATGGGGCTTGGTAACTGGACGCCTGCGGCTGAATTTAA
TATTTACGTTGACCCGGAAGCGGCAGAAATTGTCTTCCAGTCAGGAATTCCGGTGGTGATGGCCGGTCTGGATGTTACTCACAAAGCACAAATCCACGTT
GAAGACACTGAGCGTTTCCGCGCGATTGGCAACCCTGTTTCAACCATTGTTGCCGAACTGCTGGATTTCTTCCTCGAATATCATAAAGACGAAAAATGGG
GCTTTGTCGGCGCACCACTGCATGACCCATGCACCATCGCCTGGCTGTTGAAACCGGAGTTGTTTACCACTGTTGAGCGCTGGGTTGGCGTGGAAACACA
AGGGAAATATACCCAGGGTATGACAGTTGTTGATTATTATTATCTGACTGGCAATAAACCGAATGCCACCGTAATGGTCGATGTTGATCGTCAGGGCTTT
GTTGATTTACTGGCTGATCGTCTGAAATTTTACGCTTAATCACTCGCCGGATGACATCACGCCATCCGGCACCACTCATTTCATTACGGCTCGAACGGAC
GTCTCTGGAACTGATCATGACCACATTTCGGGCATAGCGTCAGCACTTCCGGTGTATAGATCGGGAGATGGAAGTGACATTTCTCGCAGACCAGATTTCC
CAGCCCTACCACTTCTCCGCTGTGATAAACCCCATGATGATTGAGGTCCTGGAAAACTTCGCGCCATTCAAGCTGCGTTTTATCGGTGATGTCTGCCAGC
TCCTGCCACAAGCTTTCTTTAATCACCCGCATAAAGACGCTGTCAGACTCTTCTTTCAGGCTCTCTTCATAGCTCATGGCGAACTCTTCCAGGTCACGTC
TGACAGCTCGCGTCAGCTCATCGACCTCGGTTCGCGTTAACTCCCCTGTTTTTATTACGCGCTCGCGCGCCTGTTCCACCAGTGCGTCGATATCACGTTC
GCCATTGCGCAGGCGTTCGCTCAGTGACGCGACCAGTTCACGGTAATATTGAGCAACCTTGTTCATCGTTTCATCTCCCGGGTCGTTAACTGACTATAAT
AATAGACGTTCTTTGTTCCTTGCTTTGCTAATACGCCCACAAACTCTGTAAATTAATGTATGAATAATCCGGGCATCATTTCAACGTCGAGTGCGCGAAA
GGCTGTTTTGACGCGGACGTTTGGGCTATGCTATGCGGATCTGAAAAACCACATCAACGCTACATTTGTAGCCGTATTGAAAACAGGACCACTGGCTGCC
ATGCAAGAGCAATACCGCCCGGAAGAGATAGAATCCAAAGTACAGCTTCACTGGGATGAGAAGCGCACATTTGAAGTAACCGAAGACGAGAGCAAAGAGA
AGTATTACTGCCTGTCTATGCTTCCCTATCCTTCTGGTCGACTACACATGGGCCACGTTCGCAACTACACCATCGGTGACGTGATCGCCCGCTACCAGCG
CATGCTGGGCAAAAACGTCCTGCAGCCAATCGGCTGGGACGCATTTGGTCTGCCTGCGGAAGGCGCGGCGGTGAAAAACAACACCGCGCCAGCACCGTGG
ACGTACGACAACATCGCGTATATGAAAAACCAGCTCAAAATGCTGGGCTTTGGTTATGACTGGAGCCGCGAGCTGGCGACCTGTACGCCGGAATACTACC
GTTGGGAACAGAAATTCTTCACCGAACTGTATAAAAAAGGCCTGGTATATAAGAAGACTTCTGCGGTCAACTGGTGCCCGAACGACCAGACCGTACTGGC
GAACGAACAAGTTATCGACGGCTGCTGCTGGCGCTGCGATACCAAAGTTGAGCGTAAAGAGATCCCGCAGTGGTTTATCAAAATCACTGCTTACGCTGAC
GAGCTGCTCAACGATCTGGATAAACTGGATCACTGGCCAGACACCGTTAAAACAATGCAGCGTAACTGGATCGGTCGTTCCGAAGGCGTGGAAATCACCT
TCAACGTTAACGACTATGACAACACGCTGACCGTTTACACTACCCGCCCGGACACCTTTATGGGTTGTACCTACCTGGCGGTGGCTGCGGGTCATCCACT
GGCACAGAAAGCGGCGGAAAATAATCCTGAACTGGCCGCCTTTATTGACGAATGCCGTAACACCAAAGTTGCCGAAGCTGAAATGGCGACGATGGAGAAA
AAGGCGTCGATACTGGCTTTAAAGCGGTTCACCCATTAACGGGCGAAGAAATTCCCGTTTGGGCAGCAAACTTCGTATTGATGGAATACGGCACGGGCGC
AGTTATGGCGGTTCCGGGTCACGACCAGCGCGACTACGAGTTTGCCTCTAAATACGGCCTGAACATCAAACCGGTTATCCTGGCAGCTGACGGCTCTGAG
CCAGATCTTTCTCAACAAGCCCTGACTGAAAAAGGCGTGCTGTTCAACTCTGGCGAGTTTAATGGTCTTGACCATGAAGCGGCCTTCAACGCCATCGCCG
ATAAACTGACTGCGATGGGCGTTGGCGAGCGTAAAGTGAACTACCGCCTGCGCGACTGGGGTGTTTCTCGTCAGCGTTACTGGGGCGCGCCGATTCCGAT
GGTGACGCTGGAAGACGGTACCGTAATGCCGACCCCGGACGACCAGCTGCCGGTGATCCTGCCGGAAGATGTGGTGATGGACGGCATTACCAGCCCGATT
AAAGCAGATCCGGAGTGGGCAAAAACTACCGTTAACGGTATGCCAGCGCTGCGTGAAACCGACACTTTCGACACCTTTATGGAGTCCTCCTGGTACTATG
CGCGCTACACTTGCCCGCAGTACAAAGAAGGTATGCTGGATTCCAAAGCGGCTAACTACTGGCTGCCGGTGGATATCTACATTGGTGGTATCGAACACGC
CATTATGCACCTGCTCTACTTCCGCTTCTTCCACAAACTGATGCGTGATGCAGGCATGGTGAACTCTGACGAACCAGCGAAACAGTTGCTGTGTCAGGGT
ATGGTGCTGGCAGATGCCTTCTACTATGTTGGCGAAAACGGCGAACGTAACTGGGTTTCCCCGGTTGATGCTATCGTTGAACGTGACGAGAAAGGCCGTA
TCGTGAAAGCGAAAGACGCGGCAGGTCATGAACTGGTTTATACCGGCATGAGCAAAATGTCCAAGTCGAAGAACAACGGTATCGACCCGCAGGTGATGGT
TGAACGTTACGGCGCGGACACCGTTCGTCTGTTTATGATGTTTGCTTCTCCGGCTGATATGACTCTCGAATGGCAGGAATCCGGCGTGGAAGGGGCTAAC
CGCTTCCTGAAACGTGTCTGGAAACTGGTGTACGAGCACACAGCAAAAGGTGATGTTGCGGCACTGAACGTCGATGCGCTGACTGAAGATCAGAAAGCGC
TGCGTCGCGATGTGCATAAAACTATCGCTAAAGTAACCGATGATATCGGCCGTCGTCAGACCTTCAACACCGCAATTGCGGCGATTATGGAGCTGATGAA
CAAACTGGCGAAAGCACCGACCGATGGCGAGCAGGATCGCGCCCTGATGCAGGAAGCGCTGCTGGCGGTAGTCCGTATGCTTAACCCGTTCACCCCGCAC
ATCTGCTTCACGCTGTGGCAGGAACTGAAAGGCGAAGGCGATATCGACAACGCGCCGTGGCCGGTTGCTGACGAAAAAGCGATGGTGGAAGACTCCACGC
TGGTCGTGGTGCAGGTTAACGGTAAAGTCCGTGCAAAAATCACCGTTCCGGTGGACGCAACGGAAGAACAGGTTCGCGAACGTGCTGGCCAGGAACATCT
GGTAGCAAAATATCTTGATGGCGTTACTGTACGTAAAGTGATTTACGTACCAGGTAAACTCCTCAATCTGGTCGTTGGCTAAGCGCGGGAGGAAGCGTGC
GATATCTGGCAACATTGTTGTTATCTCTGGCGGTGTTAATCACCGCCGGGTGTGGCTGGCATCTGCGTGACACCACGCAGGTTCCTTCCACTATGAAGGT
CATGATCCTGGACTCAGGCGATCCGAACGGGCCATTAAGCCGTGCGGTGCGTAATCAGTTACGTCTGAATGGTGTCGAGTTGCTTGATAAAGAAACCACG
CGTAAGGACGTTCCATCCCTGCGTTTGGGTAAAGTGAGCATCGCGAAAGATACCGCATCGGTATTCCGTAACGGTCAAACAGCAGAGTATCAGATGATCA
TGACGGTGAATGCGACCGTGTTGATCCCCGGCCGTGATATCTACCCGATTAGCGCCAAAGTCTTCCGTTCGTTCTTCGATAACCCGCAAATGGCGTTAGC
GAAAGATAACGAACAAGACATGATCGTAAAAGAGATGTACGACCGTGCTGCCGAACAGCTGATTCGTAAGCTGCCAAGCATCCGTGCTGCAGATATTCGT
TCCGACGAAGAACAGACGTCGACCACAACGGATACTCCGGCAACGCCTGCACGCGTCTCCACCACGCTGGGTAACTGATGATTCGGTTGTACCCGGAACA
ACTCCGCGCGCAGCTCAATGAAGGGCTGCGCGCGGCGTATCTTTTACTTGGTAACGATCCTCTGTTATTGCAGGAAAGCCAGGACGCTGTTCGTCAGGTC
GCTGCGGCGCAAGGGTTCGAAGAACACCACACTTTTTCCATTGATCCCAACACCGACTGGAATGCGATTTTTTCGTTATGCCAGGCCATGAGCCTGTTTG
CCAGTCGACAAACGCTATTGCTGTTGTTACCCGAAAACGGACCGAATGCGGCGATCAATGAACAACTTCTCACACTCACCGGACTTCTGCATGACGATCT
ACTGTTGATCGTCCGCGGTAATAAATTAAGCAAAGCGCAAGAAAATGCCGCCTGGTTTACTGCTCTTGCGAATCGCAGCGTGCAGGTGACCTGTCAGACA
CCGGAGCAGGCTCAGCTGCCCCGCTGGGTTGCTGCGCGCGCAAAACAGCTCAACTTAGAACTGGATGACGCTGCAAATCAGGTGCTCTGCTACTGTTATG
AAGGTAACCTGCTGGCGCTGGCCCAGGCACTGGAGCGTTTATCGCTACTCTGGCCGGACGGCAAACTGACATTACCGCGCGTTGAACAGGCGGTGAATGA
TGCCGCGCATTTCACCCCTTTTCATTGGGTTGATGCTTTGTTGATGGGAAAAAGTAAGCGCGCGTTGCATATTCTTCAACAACTGCGTCTGGAAGGTAGC
GAACCGGTTATTTTGTTGCGCACATTACAACGTGAACTGTTGTTACTGGTTAACCTGAAACGCCAGTCTGCCCATACGCCACTGCGTGCGTTGTTTGATA
AGCATCGGGTATGGCAGAACCGCCGGGGCATGATGAGCGAGGCGTTAAATCGCTTAAGCCAGCCGCAGTTACGTCAGGCCGTGCAACTCCTGACACGAAC
GGAACTCACCCTCAAACAAGATTACGGTCAGTCAGTGTGGGCAGAGCTGGAAGGGTTATCTCTTCTGTTGTGCCATAAACCCCTGGCGGACATATTTATC
GACGGTTGATATGAAATCTTTACAGGCTCTGTTTGGCGGCACCTTTGATCCGGTGCACTATGGTCATCTTAAACCCGTGGAAACGCTGGCGAATTTGATT
GGCCTGACGCGGGTCACAATCATCCCTAATAATGTTCCTCCGCATCGTCCCCAGCCGGAAGCGAACAGCGTGCAGCGTAAACACATGCTTGAACTGGCGA
TTGCCGACAAGCCATTATTTACTCTTGATGAACGCGAGCTAAAGCGCAATGCCCCCTCTTACACTGCGCAAACACTGAAAGAGTGGCGGCAGGAACAAGG
GCCAGACGTGCCGCTGGCGTTTATTATTGGTCAGGATTCATTGCTGACCTTTCCGACCTGGTACGAATACGAAACGATACTCGACAATGCACATTTGATC
GTCTGTCGGCGTCCAGGTTACCCACTTGAAATGGCACAACCGCAATACCAGCAATGGCTGGAAGATCATTTGACACATAACCCGGAAGATCTTCACCTTC
AGCCTGCCGGTAAAATTTATCTGGCTGAAACGCCGTGGTTTAATATCTCGGCGACCATCATCCGCGAACGTTTGCAAAACGGTGAATCGTGTGAGGATTT
ATTACCGGAACCGGTACTGACTTACATTAACCAACAAGGCTTGTATCGCTGATACCTGTCGTTACGGAGGGCATGATGCGACTGTGGTTAATTCGTCATG
GTGAAACGCAAGCGAATGTCGATGATCTGTACAGCGGTCATGCGCCCACCCCCTGACCGCGCGCGGTATTGAGCAAGCGCAAAATCTGCATACGCTGCTA
CATGATGTTTCCTTTGACCTGGTTTTATGCAGTGAACTGGAACGGGCACAGCATACCGCGCGACGGGTTCTTAGTGACCGCCAGCTCCCCGTTCATATCA
TCCCTGAACTCAATGAAATGTTTTTTGGCGACTGGGAGATGCGACATCATCGTGACCTCATGCAAGAAGATGCCGAAAACTATAGCGCGTGGTGCAATGA
CTGGCAGCATGCTATCCCCACGAACGGTGAAGGATTTCAGGCATTTTCGCAACGTGTGGAACGATTTATCGCAAGGCTTAGTGAATATCAGCACTATCAG
AATATTTTAGTCGTCAGCCATCAGGGCGTACTGAGTCTGTTAATTGCTCGTTTAATTGGCATGCCTGCCGAGTCTATGTGGCATTTCCGCGTTGACCAGG
GGTGTTGGAGCGCCATTGATATCAACCAAAAATTCGCGACGCTACGCGTCCTCAATAGCCGTGCCATCGGGGTCGAGAATGCATGACTTTTCTGTTTTTT
TACGGGTAAGCCGCAACGACCATTGACAGCCCCGGGCAGGCTGATATTCTCCGCAGCCAGACTTTTTCCGCCAGACACGACTTTGTAGAAATTGTTTTAC
AAAAATGGCGATGCAATCTGCGGCGCGGGGTGGGATGATAGCCCACTTTCGAAAGCCGATTCGGCGACAATTGTCCCGAAATCGCCTCTGGTTCAGGTAT
ACTGACAGACCATTTTTATCTATTTGATTCACCCAGGGAAAACTTGCAGGGTAAAGCACTCCAGGATTTTGTTATCGACAAAATTGATGACCTCAAAGGT
CAGGACATCATCGCCTTAGACGTTCAGGGCAAATCCAGCATCACCGACTGCATGATCATCTGTACGGGTACGTCCAGCCGCCATGTTATGTCCATTGCTG
ATCACGTTGTGCAGGAGTCTCGCGCAGCGGGCCTGTTACCGCTCGGCGTAGAAGGTGAAAACAGCGCCGACTGGATTGTCGTGGATTTGGGCGATGTGAT
TGTCCATGTCATGCAGGAAGAGAGCCGTCGCCTGTATGAACTGGAAAAACTCTGGAGTTAATGCGTGAAGCTGCAACTTGTCGCCGTGGGAACGAAAATG
CCGGACTGGGTACAAACCGGTTTTACCGAGTACCTGCGTCGTTTTCCGAAAGATATGCCCTTCGAGCTGATTGAAATTCCGGCCGGAAAACGCGGCAAGA
ATGCGGACATCAAGCGCATACTCGACAAAGAGGGTGAGCAGATGTTGGCGGCCGCAGGCAAAAACCGCATTGTCACCCTCGATATTCCAGGCAAGCCCTG
GGATACACCGCAGTTAGCCGCTGAGCTGGAACGCTGGAAGCTGGATGGTCGCGACGTCAGTCTACTGATTGGCGGGCCTGAAGGGTTGTCGCCTGCCTGT
AAAGCGGCGGCGGAGCAGAGCTGGTCGCTGTCGGCACTTACCCTTCCCCATCCGCTGGTTCGCGTGCTGGTCGCAGAGAGTCTGTACCGGGCGTGGAGCA
TCACCACCAACCATCCTTATCACCGTGAGTGATAAGTGAGCTTTGAGTAGAAAACGCAGCGGATGAAACTACAGAACTCTTTTCGCGACTATACGGCAGA
GTCCGCGCTGTTTGTGCGCCGGGCGCTGGTCGCCTTTTGGGGATTTTGCTGCTGACCGGCGTGCTTATCGCCAACCTGTATAATCTGCAAATTGTTCGCT
TTACCGACTACCAGACCCGCTCTAATGAAAACCGCATTAAGCTGGTGCCTATCGCACCCAGCCGCGGCATTATCTACGACCGTAACGGTATCCCTCTGGC
TCTCAACCGCACTATCTACCAGATAGAAATGATGCCGGAGAAAGTCGATAACGTGCAGCAAACGCTGGACGCTTTGCGCAGCGTGGTTGATCTGACCGAT
GATGATATTGCTGCATTCCGAAAAGAGCGCGCACGTTCACACCGTTTCACCTCTATTCCGGTGAAAACTAACCTGACCGAAGTACAAGTAGCTCGCTTTG
CCGTCAATCAGTACCGTTTTCCTGGCGTCGAAGTTAAAGGCTATAAACGTCGTTACTATCCTTACGGTTCGGCGTTGACCCACGTCATCGGCTATGTGTC
GAAAATCAACGATAAAGACGTCGAACGCCTGAATAATGACGGCAAACTGGCCAACTATGCGGCAACGCATGATATCGGTAAGCTGGGCATTGAGCGTTAC
TATGAAGACGTGCTGCACGGTCAGACCGGTTATGAAGAGGTTGAAGTTAACAACCGTGGGCGTGTTATCCGCCAGTTAAAAGAAGTACCACCGCAAGCCG
GACACGATATTTACCTGACGCTGGATCTCAAACTCCAGCAATATATTGAAACGCTGCTGGCGGGTAGCCGCGCAGCTGTGGTAGTCACCGATCCGCGTAC
AGGTGGGGTGTTGGCGCTGGTTTCCACGCCTAGTTATGACCCAAACCTGTTTGTTGACGGTATCTCCAGCAAAGATTATTCCGCCTTGCTGAACGACCCG
AATACACCGCTGGTGAACCGCGCCACACAGGGGTTTATCCTCCCGCGTCTACAGTTAAACCCTATGTGGCGGTTTCGGCATTGAGCGCCGGAGTGATCAC
GCGCAATACGACGTTGTTTGACCCTGGCTGGTGGCAACTGCCAGGGTCGGAAAAACGTTATCGTGACTGGAAAAAATGGGGCCACGGGCGTCTGAATGTC
ACAAGATCGCTGGAAGAATCTGCGGATACCTTCTTCTATCAGGTGGCCTACGATATGGGGATCGATCGCCTCTCCGAATGGATGGGTAAATTCGGTTATG
GTCATTACACCGGTATCGACCTGGCGGAAGAACGTTCCGGCAACATGCCTACCCGCGAATGGAAACAGAAACGCTTTAAAAAACCGTGGTATCAGGGTGA
CACCATTCCGGTTGGTATCGGTCAGGGTTACTGGACGGCGACCCCTATCCAGATGAGTAAGGCACTGATGATCCTGATTAATGACGGTATCGTGAAGGTT
CCGCATTTGCTGATGAGCACCGCCGAAGACGGCAAACAGGTGCCATGGGTACAACCGCATGAACCGCCCGTCGGCGATATTCATTCCGGTTACTGGGAGC
TGGCGAAAGACGGTATGTACGGTGTTGCTAACCGCCCTAACGGTACGGCGCATAAATATTTTGCCAGCGCACCGTACAAAATTGCGGCGAAATCCGGTAC
CGCTCAGGTCTTCGGTCTGAAAGCGAACGAAACCTATAATGCGCACAAAATTGCCGAGCGTTTACGTGACCACAAACTGATGACCGCCTTTGCGCCATAC
AACAATCCGCAAGTGGCTGTCGCCATGATTCTGGAGAACGGTGGCGCGGGTCCGGCGGTTGGTACGCTGATGCGCCAGATCCTCGACCACATTATGCTGG
GTGATAACAACACCGATCTGCCTGCGGAAAATCCAGCGGTTGCCGCAGCGGAGGACCATTAATCATGACGGATAATCCGAATAAAAAAACATTCTGGGAT
AAAGTCCATCTCGATCCCACAATGCTGCTGATCTTACTGGCATTGCTGGTTTACAGCGCCCTGGTTATCTGGAGCGCCAGCGGTCAGGATATTGGCATGA
TGGAGCGTAAAATCGGCCAGATTGCGATGGGTCTGGTCATCATGGTGGTGATGGCGCAAATTCCTCCACGCGTTTATGAAGGCTGGGCCCCTATCTCTAT
ATCATCTGTATTATTTTGCTGGTGGCGGTAGATGCTTTCGGTGCCATCTCTAAAGGCGCTCAACGCTGGCTGGACCTCGGTATTGTTCGTTTTCAACCGT
CGGAAATTGCCAAGATAGCCGTACCGTTGATGGTTGCACGCTTTATCAACCGCGACGTTTGCCCACCTTCATTGAAGAATACAGCTATCGCGCTGGTGCT
GATATTTATGCCCACGCTGCTGGTGGCTGCACAGCCTGACCTGGGAACATCAATCCTCGTTGCGCTTTCCGGCCTGTTTGTACTGTTCCTCTCTGGCCTT
AGCTGGCGTCTGATTGGCGTCGCAGTAGTGCTGGTAGCGGCGTTCATTCCGATTCTGTGGTTCTTCCTGATGCATGATTACCAGCGCCAGCGCGTAATGA
TGCTCCTGGACCCGGAATCAGACCCACTCGGCGCAGGCTATCACATTATTCAGTCTAAAATTGCTATTGGCTCCGGCGGATTACGCGGCAAAGGCTGGCT
GCACGGCACTCAGTCACAGCTTGAATTTCTCCCCGAACGCCATACCGACTTTATCTTCGCGGTACTGGCGGAAGAGCTGGGATTAGTGGGCATTTTGATT
CTTCTCGCTCTCTACATTCTGCTGATCATGCGCGGGCTGTGGATAGCCGCCAGAGCGCAAACCACCTTTGGTCGCGTCATGGCTGGCGGCTTAATGCTGA
TATTATTCGTTTATGTCTTCGTAAATATTGGTATGGTAAGCGGTATTCTGCCGGTTGTAGGGGTTCCGCTCCCACTGGTCAGTTATGGAGGATCGGCGCT
AATTGTGCTGATGGCTGGGTTCGGGATTGTAATGTCAATCCACACCCACAGGAAAATGTTGTCGAAAAGCGTGTAAGAGGTGCGCAATGCGTAAGCAGTG
GCTCGGGATCTGCATCGCGGCAGGAATGCTCGCGGCATGTACAAGCGATGATGGTCAGCAACAGACGGTAAGTGTACCGCAGCCTGCGGTATGTAACGGC
CCCATAGTTGAAATTAGCGGGGCAGACCCGCGTTTCGAACCACTGAACGCGACGGCAAATCAGGATTACCAGCGCGACGGTAAAAGCTACAAAATAGTGC
AGGATCCGTCTCGATTTAGCCAGGCGGGACTGGCGGCAATCTATGATGCCGAACCCGGCAGTAACCTGACGGCCTCTGGCGAAGCTTTCGATCCGACACA
GTTGACGGCGGCCCATCCAACGCTTCCGATCCCCAGCTACGCCAGAATCACTAACCTGGCTAACGGGCGAATGATCGTGGTGCGCATTAATGATCGCGGT
CCTTACGGCAACGACCGCGTTATTTCGCTTTCTCGCGCGGCAGCTGACCGTCTTAACACGTCAAACAACACCAAAGTTCGTATCGATCCGATTATTGTCG
CCCAGGATGGTTCGCTTTCTGGTCCTGGTATGGCTTGTACCACAGTTGCCAAACAGACTTACGCCCTGCCTGCACCTCCCGATTTAAGCGGTGGCGCGGG
AACAAGTTCAGTGTCTGGCCCGCAGGGTGACATTCTTCCGGTCAGTAATTCGACGCTAAAAAGCGAAGATCCGACCGGCGCGCCGGTAACCAGCAGCGGT
TTCCTCGGTGCACCAACGACCTTAGCGCCTGGTGTTCTGGAAGGCAGCGAACCAACGCCTGCACCACAGCCCATTGTTACAGCTCCGTCGACAACGCCTG
CAACCTCGCCTGCAATGGTGACACCGCAAGCCGCCTCGCAAAGCGCCAGCGGCAACTTTATGGTGCAAGTCGGGGCCGTTAGCGATCAGGCTCGTGCGCA
ACAGTACCAACAGCAACTGGGACAGAAGTTCGGCGTCCCCGGTCGCGTAACTCAAAATGGCGCGGTCTGGCGGATCCAGCTTGGCCCATTCGCCAGCAAA
GCCGAAGCCAGTACCTTGCAGCAACGTTTGCAAACCGAAGCCCAATTACAGTCATTTATTACCACCGCGCAGTAGCGTAAAGCAGGCATCTGATGTGTCA
ATTTCTGTAAATGACGTTAACAAAGTCACGCGGAAAGTCAGATGCCTGCCGGTAGTGCATTTGCTATAGTAGGGCACTTTTTTTAATTCCATCACGGATG
TCGTAGTTCAGACCATGAATACCATTTTTTCCGCTCGTATCATGAAGCGCCTGGCGCTCACCACGGCTCTTTGCACAGCCTTTATCTCTGCTGCACATGC
CGATGACCTGAATATCAAAACTATGATCCCGGGTGTACCGCAGATCGATGCGGAGTCCTACATCCTGATTGACTATAACTCCGGCAAAGTGCTCGCCGAA
CAGAACGCAGATGTCCGCCGCGATCCTGCCAGCCTGACCAAAATGATGACCAGTTACGTTATCGGCCAGGCAATGAAAGCCGGTAAATTTAAAGAAACTG
ATTTAGTCACCATCGGTAACGACGCATGGGCCACCGGTAACCCGGTATTTAAAGGTTCTTCGCTGATGTTCCTCAAACCGGGCATGCAGGTTCCGGTTTC
TCAGCTGATCCGCGGTATTAACCTGCAATCGGGTAACGATGCTTGTGTCGCCATGGCCGATTTTGCCGCTGGTAGCCAGGACGCTTTTGTTGGCTTGATG
AACAGCTACGTTAACGCCCTGGGCCTGAAAAATACCCACTTCCAGACGGTACACGGTCTGGATGCTGATGGTCAGTACAGCTCCGCGCGAGATATGGCGC
TGATCGGCCAGGCGTTGATCCGTGACGTACCGAATGAATACTCGATCTATAAAGAAAAAGAATTTACGTTTAACGGTATTCGCCAGCTGAACCGTAACGG
CCTGTTATGGGATAACAGCCTGAATGTCGACGGCATCAAAACCGGACACACTGACAAAGCAGGTTACAACCTTGTTGCTTCTGCGACTGAAGGCCAGATG
CGCTTGATCTCTGCGGTGATGGGCGGACGTACTTTTAAAGGCCGTGAAGCCGAAAGTAAAAAATTGCTAACCTGGGGCTTCCGTTTCTTCGAAACCGTTA
ACCCACTGAAAGTAGGTAAAGAGTTCGCCTCTGAACCGGTTTGGTTTGGTGATTCTGATCGCGCTTCGTTAGGGGTTGATAAAGACGTGTACCTGACCAT
TCCGCGTGGTCGCATGAAAGATCTGAAAGCCAGCTATGTGCTGAACAGCAGTGAATTGCATGCGCCGCTGCAAAAGAATCAGGTCGTCGGTACTATCAAC
TTCCAGCTTGATGGCAAAACGATCGAACAACGCCCGCTGGTTGTGCTGCAAGAAATCCCGGAAGGTAACTTCTTCGGCAAAATCATTGATTACATTAAAT
TAATGTTCCATCACTGGTTTGGTTAAAAATTGAACACTTGAAAGTGTAATTTCCGTCCCCATATACTAAGCATCAGTAAAAAACTCCCGCCTTCTGGCGG
GAGTTGCTATTTAATTACGTTACGCCGGAGCTGACATGAAAACCAAACTTAACGAACTGCTTGAATTCCCTACTCCTTTTACTTACAAAGTTATGGGGCA
GGCGTTACCTGAGCTGGTTGATCAGGTGGTTGAAGTGGTACAGCGCCATGCGCCAGGTGACTACACCCCAACGGTAAAACCAAGCAGCAAAGGCAACTAC
CACTCGGTATCTATCACTATCAACGCCACTCATATCGAGCAGGTTGAAACACTGTATGAAGAACTGGGCAAAATCGATATTGTCCGCATGGTTCTGTAAC
TCGCTTCTCCGTTACCCGGCTCCTGGTCGGGTAACTCCCTCTCCTCGCTGTGATATACTTTTCCCCCACTTTTACTCATTCTCCACGGAGATGCCGTTTT
GTATCAGGATAAAATTCTTGTCCGCCAGCTCGGTCTTCAGCCTTACGAGCCAATCTCCCAGGCTATGCATGAATTCACCGATACCCGCGATGATAGTACC
CTTGATGAAATCTGGCTGGTCGAGCACTATCCGGTATTCACCCAAGGGCAGGCAGGAAAGGCGGAGCATATTTTAATGCCGGGTGATATTCCGGTGATCC
AGAGCGATCGCGGTGGGCAGGTGACTTATCACGGGCCGGGGCAACAGGTGATGTATGTGTTGCTTAACCTGAAACGCCGTAAACTCGGTGTGCGTGAACT
GGTGACCTTGCTTGAGCAAACAGTGGTGAATACCCTGGCTGAACTGGGTATAGAAGCGCATCCTCGGGCTGACGCGCCTGGTGTCTATGTCGGGGAAAAG
AAAATTTGCTCACTGGGTTTACGTATTCGACGCGGTTGTTCATTCCACGGTCTGGCATTAAACGTCAATATGGATCTTTCACCATTTTTACGTATTAATC
CTTGTGGGTATGCAGGAATGGAAATGGCTAAAATATCACAATGGAAACCCGAAGCGACGACTAATAATATTGCACCACGTTTACTGGAAAATATTTTAGC
GCTACTAAACAATCCTGACTTCGAGTATATTACCGCTTAATTCCATACATCAATGGCCCAATTTACACTGGGTCATTACTCATAATACCTGCTAATGCTT
TACATCTCCTTCGCGTTTGTATATTTTCTTTATCACTTGCAGAAATGCGATGCTACGCCTTGCTCCGTAGCCCACCTAATTGATTAACTCATTGAAATGA
TTGACCATGGTGAGCAAAAGCGTTCCGTCCCAATTAGACATAAGATTATTGTAATTTTTTTAAATATTATTTTTTCATGAATAAAATTGGAGTAAGTGCG
TGGATAGTAATAATAAAATTGAACCCTGTTTAAGCAGAAAGTAGTCAGAAGGTAAACCACAAATATTTACAACCTTACGAAATATTGATCTTACCCTTCT
GACTATTTTGAAGTTGCATATGTCCATAAAGGAATCGTTAATGCAGCGAAAGTGCTTAATCTGCCCCCTCGGTCGGGGCCCTGGTCCTTCCTGTCATCTA
TCGGGCGATTAAAACTCACTATCCACAGCTTTTACTGCGCAACCCGCCCATCGGCGGCGTGGAAAACCAACTCAGTCAGTTTCAAACCGATCTCATCACC
GATAACATGTTTTGCACAGGACCATAGATGTTATCCGTAATGCATTTTGAAAAAGTATTGTTACAGCCAGATCACAGCGCAGAACGATAAAATGGCACAA
TCCAACAACAATTTTACATTTTCGCGACCGCTTTGGCTGCTTTCAGGTCCGTTTCAATGATATACTGCCAGTCGTTAATTCAAAAATAGTTGATAATTAC
AACAATCTATTGAATTGAAACGCTTTTCTTCGTAATTCGCAACTGGAACACGCACGCTATGAGTAAACCCATTGTGATGGAACGCGGTGTTAAATACCGC
GATGCCGATAAGATGGCCCTTATCCCGGTTAAAAACGTGGCAACAGAGCGCGAAGCCCTGCTGCGCAAGCCGGAATGGATGAAAATCAAGCTTCCAGCGG
ACTCTACACGTATCCAGGGCATCAAAGCCGCAATGCGCAAAAATGGCCTGCATTCTGTCTGCGAGGAAGCCTCCTGCCCTAACCTGGCGGAATGCTTTAA
CCACGGCACAGCAACGTTTATGATCCTCGGCGCTATTTGTACCCGCCGTTGCCCGTTCTGTGACGTTGCCCACGGTCGCCCGGTAGCTCCTGATGCCAAT
GAACCAGTGAAACTGGCGCAGACCATTGCCGATATGGCGCTGCGTTATGTGGTTATCACCTCCGTTGACCGTGATGACCTGCGCGATGGCGGTGCCCAGC
ACTTTGCGGATTGCATTACTGCCATTCGGGAAAAAAGCCCGCAAATCAAAATTGAAACTCTGGTGCCGGATTTCCGTGGTCGTATGGATCGTGCTCTGGA
TATTCTGACTGCAACGCCACCAGATGTGTTCAACCATAACCTGGAAAACGTACCGCGTATTTACCGTCAGGTACGGCCTGGTGCAGATTACAACTGGTCG
CTTAAGCTGCTGGAACGCTTTAAAGAAGCGCATCCGGAAATCCCGACCAAGTCTGGTCTGATGGTGGGACTGGGTGAAACCAATGAAGAAATTATTGAGG
TAATGCGCGACCTGCGCCGTCATGGTGTGACGATGCTAACGCTGGGGCAATATTTGCAGCCAAGCCGCCATCACCTGCCGGTTCAACGTTACGTTAGCCC
GGATGAGTTCGACGAAATGAAAGCCGAAGCGCTGGCGATGGGCTTTACCCATGCTGCATGCGGTCCGTTTGTCCGCTCTTCTTACCACGCCGATTTGCAG
GCGAAAGGGATGGAAGTTAAGTAATCCTGTAATAATTACTTACATCTGTCTGATAAAAAACCCGCTTTTTGAAGCGGGTTTTTGTATCGAACAAGATATT
GAGGGAGCGTCCTGCTCGCCACGTCACTCTTTATGAGAGAGCTTTTCAGCCTGAAGATCAACGTCTGCGCCTTTTTTCGCCGCAGCATCGTCATCATTCA
TCGCCTTCTTGAACCCTTTAATGGCCGCTCCAAGGTCTCCGCCCAGCGTACGTAACTTCTTAGTCCCAAACAGCAGAACGACCAGCGCCGCAACTACCAG
CAGTTTGGTAATACTAATCTCACCCATAGATACCTTCTTGACATATAACCGGCAACAGAACGCGCCTTAAAAACCAGAGAATATTAACGGTCATTCGACG
CGCGCACACAATAGCAATCTGTAACAAGGTGAATCAAGCGCCGAGTAAAAAAACATCATAATAATTGCGGCGGCGCAAAGCGACGGTTGTTTAAGACGGG
CAGTTGCGCGCGTACCTGACGCACACGTTCGGGCGTCACTTCCGCCATAATGAGTGCAGGCATTTCTGACGCTGCCGCAATGGTGACGCCAAAGGGATCT
ATAATCCGGCTTTGCCCGATATTTTTATTCCCGCACTCCCCGCCGCCACCATATAACAGGTGGTATCCAGCGCACGAGCGGCAAGCAACGTTGACCAGTG
ATGCTCTTTGAGCGGCCCACGAACCCAGGCGGCAGGAAGTACCAGGATTTCAGCTCCCTGTAATGCCTGTGCCAGCGCCAGCTCTGGAAAGCGTAAGTCA
TAACAGGTCATCAGACCGACCTTCATCCCTTCCACCTCCAGTAACGGAGCTATTTCATTACCAGCATCAACATGGCGTGATTCCTGAATGGCAAATGCAT
CATAGAGATGCAGTTTGGCATAACGGGCGACGATGTTTCCTGCCTGTAGCGCCACCAGCATATTCCACGCGCGCCCCGGTGTTGAAGGAACATGAATCGT
CAGAATTGTCGTCATCATGTTACGTTTACTTTCTCGCCGTAAACGGTCGAGGAATTCGCCTTCCAGCAGCTGTGCTGATTTAACCGAAAGATCCGCATCA
TGATCATCACGCGCCAGTAATGCTTCCGGCAGGACAAACAGCGAAACCTCGTTTTCCGCCGCCTGCGCCATCAACGAGGCACAAATCTCAGCGTTCTTTT
CCCACACAGATGTAACAGCAAACTGTCCTGCGGCAACCAGCATTGCCACCTCCTGTCAGAGTCGTAAAATTCGCCAACGGCGATTATTCGGCGTTACACT
TATCATTCATACAAATCAAATAGCAGGATTTTGCAGTGTTACAACTTCTTTTAGCAGTTTTTATCGGCGGTGGTACGGGAAGCGTGGCGAGATGGCTGTT
AAGTATGCGATTTAACCCGCTGCATCAGGCGATTCCGTTGGGGACGCTGGCAGCAAACCTGATTGGGGCATTCATCATAGGAATGGGATTCGCCTGGTTC
AGCAGGATGACGAACATTGATCCAGTGTGGAAAGTATTAATCACCACCGGATTTTGTGGCGGTCTAACAACCTTCTCAACATTTTCGGCAGAAGTGGTGT
TTTTGTTACAAGAGGGCCGCTTTGGCTGGGCGTTACTGAACGTTTTCGTCAATCTTTTGGGGTCTTTTGCCATGACCGCACTGGCTTTCTGGCTGTTTTC
GGCCTCAACCGCACACTAAAGACCAAAAAAACCCGCTGATTAAGCGGGTTTTGAATTCTTGCTGACGTATCTTACAGAGCGATTACGTTTGCAGCAGAAG
GGCCTTTGGCACCGTTAGTGATTTCGAACTCTACACGCTGACCTTCAGCAAGAGTTTTAAAACCATTAGTCTGGATTGCAGAGAAGTGTACGAACACGTC
TTTGCTGCCGTCTTCCGGAGTAATGAAACCGAATCCTTTGGACTCATTAAACCACTTAACGTTACCTTTAATCTTAGACATCAAAATTACCTTTACATGA
AAAATAGACACAAATGCTGTGTCGGTTACCAGTACACCAATTGTGGTACGCTTTGTCCAGTGCAACTTTACTAAAAAGTGATAAAAGTCGCGTTATTTTT
GATGTTAATTATTTTAGTGGTTGATTTTAAAGAATTTACTAAAACTTCATTTGTCTCAAAACTGAAAGCGCATCCAGGCAAAGTACACATTGCCATTGTT
GTAGGTACCCGGAATGTAGGTCATCTGAAACGTCGCGGGGCCATACCCCACAGAGGCCAATGGCAGTAGAACCGGAAGAGGGATGTAATTCCAGTTATCG
CGCGCCGTTACGCCAGCGGTAAATCCCAGGCCTAAATGAAAATTTTCATCCGCCAGCGGTCGCCAGGTACTTTCCCATCCGTATCCGGCAATCGGTTCCC
ATTTGTTCCACGAGTCCTTAAATGCCATGGCATACAGGCCATGCCAGTTTCCTTTTTCATCCCAACGCGACTGACCAAAACCGCCGCCCCACGGTCGCTC
GTTATAGCGATCGGTTTTTTCTTTGTCATAGGCAAAACGCGCATGCCAGGTGATCGCGGGTATGTACAAGTCATAATGTTGTGGCTGTTGCCATGTTTCT
GCAACATTCTCTTTAAATGTCGACAGCCATTGAGGTGTGTCAGCAGAAGCGTCTTCAATGCCGACTAATTGAGTAAAAACAAAGAGAAGTGCGTAAATAT
ATTTACCAGTGCTCATTAGTAACCATGAGATATTTATCAAAAAACCACGACTAGCATAACCAGTTTAAAATAAACATAACCTTAACAGCACCAATATAAG
GAATAATCCGAGTGTTTTATATATTTATGCGGTGCAATTTTGAGGGAATATTATCGGATTGTTCTGGAAACTTAAACGATTTTTTTGCCCGCAAACGTTC
TCAATCAAAGAACACTCCTCCAATACAAACAACAATAGATAAAAGCACAAATGCGCTTATTTTTTAAACAAATATAAAAATCAATCAATAAACATTCCCA
GTATTGCCGGGCCATGTTAATGAACGCCCGTTTCTTTAAACAAAAAATTTATCAATTTCCCAACAAAATCAATTCAATATTTTATCAATTTTGCATACAT
CATTGCTTTGTAATGATTAACTACAAAAATGAATTTTGTTATCCAGGTATAAAAAACAGCAATATCAATGTGTTAATAGCTATTTTTATTGATTTCAATC
AGCATTCGCTGGTGATTTATTCGGCATATTTTTTCTTTAATTTTTAGAGATTTTTTATTATTTACTTTGGGGCCTGGAGACAGGAAAAATTATGCTGACA
TTCATTGAACTCCTTATTGGAGTTGTGGTTATTGTGGGTGTAGCTCGCTACATCATTAAAGGGTATTCTGCCACTGGCGTGTTATTTGTCGGTGGCCTGT
TATTGCTGATTATCAGTGCCATTATGGGGCACAAAGTGTTACCGTCCAGCCAGGCTTCAACAGGCTACAGCGCCACGGATATCGTTGAATACGTTAAAAT
ATTGCTAATGAGCCGCGGCGGCGACCTCGGCATGATGATTATGATGCTGTGTGGCTTTGCCGCTTACATGACCCATATCGGCGCGAATGATATGGTGGTC
AAGCTGGCGTCAAAACCATTGCAGTATATTAACTCCCTTACCTTCTGATGATTGCCGCCTATTTTGTTGCCTGTCTGATGTCACTGGCTGTCTCTTCCGC
AACCGGTCTGGGTGTTTTGCTGATGGCAACCCTGTTTCCGGTGATGGTAAACGTTGGTATCAGTCGTGGCGCAGCTGCTGCCATTTGTGCCTCCCCGGCG
GCGATTATTCTCGCACCGACTTCAGGGGATGTGGTGCTGGCGGCGCAGGCTTCCGAAATGTCGCTGATTGACTTCGCCTTCAAAACAACGCTGCCTATCT
CAATTGCTGCAATTATCGGCATGGCAATCGCCCACTTCTTCTGGCAACGTTATCTGGATAAAAAAGAGCACATCTCTCATGAAATGTTAGATGTCAGTGA
AATCACCACCACTGCCCCTGCGTTTTATGCCATTTTGCCGTTCACGCCGATCATCGGAGTGCTGATTTTTGACGGCAAATGGGGTCCGCAATTACACATC
ATCACTATTCTGGTGATTTGTATGCTAATTGCCTCCATTCTGGAGTTCATCCGCAGCTTTAATACCCAGAAAGTTTTCTCTGGTCTGGAAGTGGCTTATC
GCGGTATGGCAGATGCATTTGCTAACGTGGTGATGCTGCTGGTTGCCGCTGGGGTATTCGCTCAGGGGCTTAGCACCATCGGCTTTATTCAAAGTCTGAT
TTCTATCGCTACCTCGTTTGGTTCGGCGAGTATCATCCTGATGCTGGTATTGGTGATCCTGACAATGCTGGCGGCAGTCACGACCGGTTCAGGCAATGCG
CCGTTTTATGCGTTTGTTGAGATGATCCCGAAACTGGCGCACTCCTCCGGCATTAACCCGGCGTATTTGACTATCCCGATGCTGCAGGCGTCAAACCTGG
GTCGTACCCTATCACCCGTTTCTGGCGTAGTCGTTGCGGTTGCCGGGATGGCGAAGATCTCGCCGTTTGAAGTCGTAAAACGCACCTCGGTGCCGGTGCT
TGTTGGTTTGGTGATTGTTATCGTTGCTACAGAGCTGATGGTGCCAGGAACGGCAGCCGCGGTCACAGGTAAGTAAATAGTCATGCCGGAGGCAAGTTTC
CTCCGGCTTTATCATGTCACCCACTGTGGTATATGCGTTGCGGTCTGCCAACTTTGCCGTGAACAATTTCAGCAATAATCAGATGGCGGCTGGCGCAATA
TTCAAGATAACGTCTGGCAGTGGTGCGGCTGATAGTCAGTGCCTGCGCCACCGTTTCTGCCGTATGTTGCACACCAGGCTCTTTAAACAGTTTTCGCACC
GCGTTTAGCGTCAAGGGGTCAATGCCGGTCGGCAGTTCGTCTTTGGGTTCACCGCGAGCATAGGCATTAAACATCTCATCAATTTGCTTCTGGCTGGCGC
TATCAATACTTTCCAGCATATGTTTACGCTGGCGGAAACGGGTTAGCGTTTGCCCCAGACGTTCATAGGCAATTGGCTTAATGAGATAATCAAATACACC
ACAACGTACGGCTTCAGACACCGTTTCCATATCACTGGCTGCAGTGGTAAACACCACGTCGCCGGGATAATGCGCCTGCACCAGTTCATGCAGTAAATTA
ATCCCTCTACCGTCAGGAAGATAGTTATCGAGCAAGATTAGCCCCGGCTTAAAACGCTCGATCATCATTCGGGCCTGCGCCAGGTTTCCCGCCAGTAATA
TCTGACTGAATCCGGGAATGTGACGAATATATTCCGCATGCATCTCTGCCAGCGGCGTTTCGTCCTCAACGATCAATAGGGTTAATGGAGCTGTCATTAG
GTTTCACTTTCGGAATATAGATTGAAAATAAGGTACCGCAGGGATCATTATCTTCGAGAGTGATAACACCACCGCAGCGCGTTACGTAGCTGGCAATCAA
GTACAACCCAATGCCATGTTCACCGGGCTCGTCAGCACGCGTACTGACACCCTGCTCAAATATTTTGTCTCGTAGAGACTCTGGAACGCCGCAGCCCTGA
TCGGCGACTTCAATCACCACATCATCGCCTTCATCGCTGAGGAATAATTCAACGATCTTGTTTCCTTCATCGCTACGCAGGCTTGCTTCGAAGGCGTTAT
CAAGTAAATTGCCAACAATGGCTGCAAACTCGGTGCTGTCCAGTCCTGGCGGCAGCTGCGAAAGCTGGCTACCGGGGACGATGACCATTTTTAGCCCCAG
TTCGCGGGCGCGCTGCACTTTACCAAAAAGCAGCCCCGCCACCTGGCGATCGGCAAACGCCTCACGCAGGCTGTCAATAAGCTGTTGCTGGGCCTGAGAC
TCCCCTGCACCATCGCCAGCACGCGATCATACTCTTTCATCTGCAACAGACCATTGAGCGTCGACATCCAATTGAGATGCTCGTGTCGCAATGTACGAAG
GCTCTCGACGTATTGTTTAATTTGCGTCAGTTGCGCATTGAGGGTGGAAATTTCGTCTTTACTACGAAAGCTAATAATGGCCCCCAGTAAATCATCGCCA
GAACGAATAGCTTCCCGGTTGGCAATAACGCTCAGACCGTTAAAGTTCGCCACCACATCCTGACGTTTTTCATCAATCTGTTCGGTAAAGAAATCGGCGG
GCCTGACCACTTCAGCAATGGGTTTACCCAACCATTGCCGTCCGGGGAGCTCAGCCCCAGCATCTTTCTTGCGTTACGATTGATGGCGGTAATGTACCCG
TGCGGATCCACCGCAATCAGCCCTTCATAAACCGAACTAAACAGCGCCTCTTGCTGACGGACCACGCGAGCGATTTGCTTTGGCTCCATGCCCATCATCT
GCCGACGGATATGCGCGGCCAGGAACCACGACAGCAACATCAAAATCCCTAACAGCACGACAAACACGCCTGCCATCGGTAATAAAAACTCAGCCCGCCA
GCTATCGATTTTACTCACCAGGTAGCCAATCGACACCACGCCGATGACTTTTCCATCGTCATCAAAGATTGGCGTTTTGGCACGCATCGCCATGCCAATT
GACCCTTTCCCGGTGATGAAGTAGCTCTCCCCTTTCTCCAGCGCGCCCGGTTTGGTGAACTGCATAGGATAACCAATTTTCTCCGGATTAGGATGGTAAA
GACGAATCGAGTGCCGATCGCCAATCACCACATAATCGAAATCAGTATCTCTTTGTAATTTGTCAGCGATGGTCGCCAGCCTCTTGTAGTCACGCGTTTT
CACTGCACTGATGATACTGTCATTAGAAGCAATAATTTTTGCCTGATTCATTGCCATGTCGCGCACATGAAGCGTTAAATAGTCCTCAAAACTGGCTGTA
AAATATTGCGCCAGGGCTGCAATGACAAATATTGAGAACACCAGAATCAGCAAAAAGATACGCAGCGGAAATGCCAGTCTTTGGAAAAATGCAAACTGTT
TATTCTCGTTAAGCTGCAACATTGTTTTCCTTGCGGGTTGTCCCGAGCCTCTTTGACGGATGTAATTAAAATGTTGAATCAAAATACATAGATATTAAAT
ATGATCGTGGCAAATTTTATTCATTAAATCAATTAAATCACTTAAAGCTGCGGGTTATTTCGTAATTACATTAGTTAAAAAACTTAAAACCATTAAATAA
ATAAAAAACCACTAACTCTATGTGAAATAAATCAAAATTTCACGCCAAAATACTCCTTAGGATGTATAGCGAAAGGAGAAAAAGATATACCTCGATCGCC
CCCTTTCTCCCAAGTGAAAATAAAAGGTTATCAATTTGCAACATTGAACAACATTCGTTGCAAATCGATAACAACATGCACCTTCAGGATACTATTTATT
ATGTTCGGCAATGATATTTTCACCCGCGTAAAACGTTCAGAAAATAAAAAAATGGCGGAAATCGCCCAATTCCTGCATGAAAATGATTTGAGCGTTGACA
CCACAGTCGAAGTATTTATTACCGTAACCCGCGATGAAAAGCTTATCGCGTGCGGTGGAATTGCCGGAAATATTATTAAATGCGTTGCTATCAGTGAATC
CGTTCGCGGTGAAGGACTGGCGCTGACATTAGCCACTGAACTGATAAACCTCGCCTATGAGCGGCATAGCACGCATCTGTTTATTTATACCAAAACCGAA
TACGAGGCGCTGTTCCGCCAGTGCGGTTTTTCCACGCTGACCAGCGTACCCGGCGTGATGGTGCTGATGGAAAACAGCGCCACGCGACTGAAACGCTATG
CCGAATCGCTGAAAAAATTTCGTCATCCAGGGAACAAGATTGGCTGCATTGTGATGAACGCCAATCCCTTTACGAATGGTCACCGTTATCTGATTCAACA
GGCTGCGGCACAGTGCGACTGGTTGCATCTGTTTTTAGTCAAAGAAGATTCTTCACGCTTCCCCTATGAAGACCGGCTGAATCTGGTGTTAAAAGGCACC
GCCGATATTCCACGCCTGACCGTGCATCGCGGCTCCGAATACATCATCTCCCGCGCTACGTTCCCTTGCTACTTCATTAAAGAACAGAGCGTCATTAACC
ATTGCTACACCGAAATTGATCTGAAGATTTTCCGTCAGTACCTCGCTCCCGCGCTGGGTGTAACTCACCGCTTTGTCGGTACTGAACCCTTTTGTCGCGT
TACCGCCCAGTACAACCAGGATATGCGCTACTGGCTGGAAACGCCGACTATCTCCGCACCGCCCATCGAACTGGTTGAAATTGAGCGGCTGCGTTACCAG
GAGATGCCGATATCCGCTTCCCGGGTACGTCAACTGCTGGCGAAAAACGATCTCACGGCTATCGCGCCGCTGGTCCCTGCAGTCACGCTGCATTATTTGC
AGAACCTGCTTGAGCACTCCCGCCAGGACGCGGCAGCTCGTCAAAAGACCCCCGCATGAGAAACAGGTGAAAAATGAAAATAAACCAGCCCGCCGTTGCA
GGCACCCTTGAGTCTGGGGATGTGATGATACGCATCGCCCCACTCGATACGCAGGATATCGACCTGCAAATCAACAGCAGCGTTGAGAAACAGTTTGGCG
ATGCAATTCGCACCACCATTCTGGACGTTCTCGCCCGCTACAACGTGCGCGGCGTACAGCTGAATGTCGATGACAAAGGCGCACTGGACTGCATTTTACG
TGCACGACTGGAAGCCCTGCTGGCACGCGCCAGCGGTATCCCGGCTCTGCCATGGGAGGATTGCCAATGATTTCCGCTTCGCTGCAACAACGTAAAACTC
GCACCCGCCGCAGCATGCTGTTTGTGCCAGGTGCCAATGCCGCGATGGTCAGCAACTCATTCATCTACCCGGCTGATGCCCTGATGTTTGACCTCGAAGA
CTCCGTGGCATTGCGTGAAAAAGACACCGCCCGCCGCATGGTTTACCACGCGCTGCAACATCCGCTGTATCGCGATATTGAAACCATTGTGCGTGTAAAC
GCGCTGGATTCCGAATGGGGTGTTAACGACCTGGAAGCCGTCGTTCGCGGTGGTGCGGACGTTGTGCGTCTGCCGAAAACCGATACCGCTCAGGATGTTC
TGGATATCGAAAAAGAGATCCTGCGCATCGAAAAAGCCTGTGGTCGTGAACCCGGCAGCACCGGCCTGCTGGCGGCGATTGAATCTCCGCTGGGCATTAC
CCGCGCGGTAGAAATCGCTCACGCTTCCGAGCGTTTGATCGGTATCGCCCTCGGTGCAGAAGACTATGTGCGCAACCTGCGTACAGAACGCTCCCCGGAA
GGAACTGAACTGCTGTTCGCTCGCTGCTCCATTTTGCAGGCCGCGCGTTCTGCGGGTATTCAGGCGTTCGATACCGTCTATTCCGACGCTAACAACGAAG
CCGGATTCCTGCAAGAAGCCGCCCACATCAAACAGCTGGGCTTTGACGGCAAATCGCTGATCAACCCGCGTCAGATTGATCTGCTGCACAACCTCTACGC
ACCGACCCAGAAAGAAGTGGATCACGCCCGCCGCGTCGTAGAAGCCGCTGAAGCCGCCGCTCGCGAAGGCCTCGGCGTGGTTTCCCTGAACGGCAAGATG
GTGGACGGTCCGGTTATCGATCGCGCCCGTCTGGTGCTCTCCCGTGCAGAACTTTCCGGCATCCGCGAAGAATAAGGCAATCAAAATGACGCAGAAAATT
GAACAATCTCAACGACAAGAACGGGTAGCGGCCTGGAATCGTCGCGCTGAATGCGATCTTGCCGCTTTCCAGAACTCGCCAAAGCAAACCTACCAGGCTG
AAAAAGCGCGCGATCGCAAACTGTGCGCCAACCTGGAAGAAGCGATTCGTCGCTCTGGTTTACAGGACGGCATGACGGTTTCCTTCCATCACGCTTTCCG
TGGCGGTGACCTGACCGTCAATATGGTGATGGACGTCATCGCGAAGATGGGCTTTAAAAACCTGACTCTGGCCTCCAGCTCCCTGAGTGATTGCCATGCG
CCGCTGGTAGAACACATTCGCCAGGGCGTGGTTACCCGCATTTATACCTCTGGCCTGCGCGGTCCACTGGCGGAAGAAATCTCCCGTGGTCTGCTGGCGG
AACCGGTGCAAATCCACTCTCACGGCGGACGTGTGCATCTGGTACAGAGCGGCGAACTGAATATCGATGTGGCTTTCCTCGGCGTCCCGTCCTGTGATGA
ATTCGGTAATGCCAACGGCTACTCCGGTAAAGCCTGCTGCGGCTCCCTCGGCTATGCAATGGTTGATGCCGACAACGCAAAACAGGTCGTGATGCTTACC
GAAGAACTGCTGCCTTATCCGCATAATCCGGCAAGCATTGAGCAAGATCAGGTTGATCTGATCGTCAAAGTTGATCGCGTTGGCGATGCTGCAAAAATCG
GCGCTGGTGCTACCCGTATGACCACTAACCCGCGCGAACTGCTTATTGCCCGTAGCGCTGCGGATGTGATTGTTAACTCTGGCTACTTCAAAGAAGGTTT
CTCCATGCAGACCGGCACCGGCGGCGCTTCGCTGGCGGTAACCCGTTTCCTGGAAGACAAAATGCGTAGCCGCGATATTCGCGCCGACTTCGCCCTCGGC
GGTATTACCGCAACGATGGTTGATCTGCACGAAAAAGGTTTGATCCGCAAACTGCTGGATGTGCAGAGCTTTGACAGCCATGCTGCGCAATCGCTGGCCC
GTAACCCCAATCACATCGAAATCAGCGCCAACCAGTACGCTAACTGGGGGTCGAAAGGCGCAGCGGTTGATCGTCTCGACGTGGTGGTACTGAGCGCGCT
GGAAATTGACACCCAGTTCAACGTTAACGTGCTGACCGGCTCTGACGGCGTACTGCGTGGTGCTTCCGGTGGTCACTGCGATACCGCGATTGCCTCTGCG
CTTTCCATCATCGTCGCGCCGCTGGTACGCGGTCGTATTCCGACGCTGGTGGATAACGTGCTGACCTGCATCACCCCGGGCTCCAGTGTCGATATTCTGG
TCACAGACCACGGCATCGCTGTTAACCCGGCACGTCCGGAGCTGGCAGAACGTCTGCAGGAAGCGGGGATCAAAGTGGTTTCTATTGAGTGGCTGCGTGA
ACGTGCGCGTCTGCTGACCGGTGAACCACAGCCGATTGAATTCACCGACCGCGTCGTTGCCGTTGTGCGTTACCGCGATGGCTCGGTGATCGATGTTGTG
CATCAGGTGAAGGAATAAGCCATGCACCTGCTTCCTGAACTCGCCAGCCACCATGCGGTGTCAATTCCCGAGCTGCTCGTCAGCCGGGATGAAAGGCAAG
CACGGCAACACGCCTGGCTCAAGCGCCATCCTGTTCCACTGGTCTCCTTTACCGTGGTTGCGCCTGGGCCGATTAAAGACAGCGAGGTCACACGCCGAAT
TTTTAATCATGGCGTGACAGCCTTGCGTGCCTTAGCCGCAAAACAGGGCTGGCAAATTCAGGAGCAGGCTGCACTGGTTTCCGCCAGCGGGCCGGAGGGC
ATGTTGAGCATTGCCGCCCCGGCTCGCGACCTCAAGCTCGCCACCATTGAGCTTGAACATAGTCATCCTCTCGGGCGGTTATGGGATATCGATGTCCTGA
CGCCCGAAGGCGACATTCTCTCCCGCCGCGATTATTCACTGCCGCCTCGCCGCTGCCTGTTGTGCGAGCAAAGCGCAGCTGTTTGCGCGCGTGGAAAAAC
CCATCAACTGACCGATTTACTCAACCGCATGGAGGCGCTGCTGAACGATGTCGATGCCTGCAACGTCAACTAAAACCACAAAACTTGCGACGTCATTAAT
CGATGAGTACGCCCTGCTGGGCTGGCGCGCCATGCTGACTGAAGTCAACCTGTCACCGAAACCAGGCCTCGTGGATCGCATTAACTGCGGTGCGCACAAA
GATATGGCGCTGGAAGATTTCCACCGCAGCGCGCTGGCGATTCAGGGCTGGTTACCCCGTTTCATTGAATTTGGTGCCTGTAGTGCAGAAATGGCACCGG
AAGCGGTACTCAACGGATTACGCCCAATTGGTATGGCTTGCGAAGGTGATATGTTCCGCGCCACTGCGGGCGTAAACACGCATAAAGGAAGCATTTTTTC
TTTAGGGCTACTGTGTGCGGCAATTGGCCGTTTGCTTCAGCTCAACCAGCCGGTAACGCCAACAACCGTTTGTTCTACGGCGGCAAGTTTCTGCCGTGGC
CTGACCGATCGCGAACTGCGTACCAATAATTCACGACTGACGGCAGGTCAACGGTTGTACCAGCAGCTTGGCCTTACCGGCGCACGCGGTGAAGCCGAAG
CGGGTTATCCACTGGTGATCAACCACGCCTTGCCGCATTACCTCACTCTGCTGGATCAGGGGTTAGATCCTGAGCTGGCATTGCTCGATACCTTGCTCCT
ACTGATGGCTACCAACGGCGATACCAACGTTGCATCGCGCGGTGGCGAGGGGGCCTGCGCTGGCTACAGCGCGAGGCGCAAACATTATTGCAAAAAGGGG
GCATTCGAACCCCCGCCGATCTCGATTATCTCCGGCAGTTCGACAGGGAGTGTATCGAACGAAATCTCAGTCCAGGCGGCAGTGCCGACCTGCTGATCCT
TACCTGGTTTTTAGCACAGATTTAATTATTTAAGCACTTGATAAATTTGGAAATATTAATTTTCGGAGAACCCGTATGTCTTTAGCAAAAGATAATATAT
GGAAATTATTGGCGCCCCTGGTGGTGATGGGTGTCATGTTTCTTATCCCTGTACCTGACGGTATGCCGCCGCAGGCGTGGCATTACTTTGCAGTGTTTGT
GGCAATGATTGTCGGCATGATCCTCGAGCCAATTCCGGCAACGGCGATCAGTTTTATTGCGGTTACTATTTGCGTTATTGGCAGTAATTACCTGCTCTTT
GATGCCAAAGAATTAGCTGACCCAGCGTTTAATGCGCAAAAACAGGCGCTGAAATGGGGTCTGGCTGGTTTTTCCAGCACCACGGTATGGCTGGTATTTG
GCGCATTTATTTTTGCATTAGGGTATGAAGTTTCCGGGTTAGGCCGTCGTATTGCCCTTTTCCTGGTGAAATTCATGGGCAAACGCACGCTGACGTTGGG
TTATGCGATTGTCATTATCGACATTCTGCTGGCACCGTTTACACCGTCCAACACCGCGCGTACCGGGGGTACGGTTTTTCCGGTCATTAAAAACCTGCCG
CCGCTGTTTAAATCATTCCCGAACGATCCGTCCGCGCGTCGTATTGGCGGCTATTTGATGTGGATGATGGTCATTAGTACCAGTCTGAGTTCGTCCATGT
TTGTCACCGGTGCGGCACCAAACGTGCTGGGTCTGGAGTTCGTCAGCAAAATTGCCGGTATCCAGATTAGCTGGTTGCAGTGGTTCCTCTGCTTCCTGCC
GGTTGGGGTTATCTTGCTTATCATTGCGCCGTGGCTTTCCTACGTGCTGTACAAACCGGAAATCACACACAGTGAAGAAGTGGCAACCTGGGCGGGTGAT
GAACTAAAAACCATGGGTGCGCTGACGCGCAGAGAGTGGACGCTGATTGGCCTTGTATTGCTCAGCTTAGGTTTGTGGGTATTTGGCAGTGAAGTCATTA
ATGCTACTGCGGTAGGTCTGCTGGCAGTTTCGCTGATGCTGGCGCTGCACGTTGTGCCGTGGAAAGACATTACTCGCTATAACAGCGCATGGAACACGCT
GGTCAACCTGGCAACGCTGGTTGTTATGGCGAATGGCCTGACCCGTTCTGGCTTTATCGACTGGTTCGCCAACACGATGAGTACGCACCTGGAAGGCTTC
TCACCAAACGCAACGGTGATTGTACTGGTTCTGGTGTTCTACTTTGCCCACTACCTGTTTGCCAGCCTGTCTGCGCACACCGCAACCATGCTGCCGGTTA
TTCTGGCCGTCGGTAAAGGGATTCCGGGCGTACCAATGGAACAACTGTGTATCCTGCTGGTGCTGTCTATCGGTATCATGGGCTGTCTGACGCCTTATGC
AACCGGTCCTGGGGTGATTATTTACGGCTGTGGCTATGTGAAATCAAAAGATTACTGGCGTCTTGGCGCAATCTTCGGGGTGATTTACATCTCTATGCTG
CTGTTGGTTGGCTGGCCGATTCTCGCCATGTGGAACTAATACGTTCGCCAAACGCTGAATAAATCATCACGCCCGCCAGGTAAGCCCACCTGGCGGGCTT
TTTTATGATTTAATAGATAATATTCAGTGTATGTATGAGTTCCACACCCATTATGAAAGCATTCTGGCGTAACGCCGCGTTGCTCGCGGTTTCTCTGCTT
CCCTTCTCTTCTGCCAACGCCGTGGCGTTGCAGGCAAAACAGTATGGCGATTTTGATCGCTATGTCCTGGCCCTCTCCTGGCAAACCGGATTTTGCCAGA
GTCAACACGATCGAAATCGTAACGAACGAGATGAATGTCGCCTGCAAACCGAAACGACCAACAAAGCTGATTTTTTGACCGTACATGGTCTGTGGCCAGG
ATTGCCTAAATCGGTTGCTGCCCGTGGTGTTGATGAACGCCGCTGGATGCGCTTCGGTTGCGCTACTCGCCCAATCCCGAATCTACCAGAAGCGCGCGCC
AGCCGAATGTGTTCATCGCCGGAAACCGGGTTATCACTGGAAACGGCCGCTAAACTAAGTGAAGTCATGCCAGGAGCTGGCGGACGTTCCTGCCTGGAAC
GCTACGAATATGCCAAACACGGTGCCTGCTTTGGTTTTGATCCAGACGCATACTTCGGCACGATGGTACGCCTGAATCAAGAAATTAAAGAGAGCGAAGC
CGGAAAATTCCTTGCGGATAACTACGGTAGAACAGTGAGCCGCCGTGACTTTGATGCCGCCTTTGCCAAAAGCTGGGGAAAAGAGAACGTGAAAGCAGTT
AAGCTAACGTGCCAGGGTAACCCTGCGTATTTAACTGAAATTCAGATCTCGATCAAAGCTGACGCCATCAACGCTCCGCTTTCTGCCAACTCATTCTTGC
CACAACCACACCCAGGCAACTGTGGCAAAACCTTTGTGATTGATAAAGCAGGTTATTAATCCTCTGATTTACAAAACACGCTAATTCGTCTTCCATAAAC
CATGACGATTAAGATTTATACATAATGCGCTACATTGAGGAATTCCCTGAATGTGACGCAAATCACTTCAAAGAGTGAGCAACAGCCAGTATCATCATGT
GAGTTAAACCCTCGCCGCCTGACGGTGAGGGTTTTCTTTTGGGTATGTTTATCTGCGACACTCGCAGTACCGACGACATGGAGTAAAAATGTCCAGACCA
ACTATCATCATTAACGACCTGGATGCCGAACGCATCGATATTCTGCTGGAGCAACCCGCCTATGCTGGTTTGCCAATCGCCGACGCGTTAAACGCAGAGT
TGGATCGCGCCCAAATGTGTTCGCCAGAAGAGATGCCACACGACGTGGTGACAATGAACAGCCGGGTTAAATTCCGCAATCTTAGCGATGGCGAAGTGCG
TGTGCGCACGCTGGTGTATCCGGCAAAAATGACCGACAGCAATACTCAGCTTTCCGTTATGGCTCCGGTAGGTGCCGCACTGCTGGGGCTGCGCGTTGGC
GATTCCATTCACTGGGAACTTCCGGGCGGCGTTGCAACCCACCTTGAAGTGCTGGAACTCGAATACCAGCCAGAAGCTGCTGGCGACTACCTGCTTTAAT
CCCATCTGCACAAGCGATAACTCGCTTTGCCCAGAGGATGCACTCGCATCCTCTTTCCGCTCAAATATCAACCAGATTTATCATTTTGCTCTTAAGCGCA
GCATTCTAATCTGAACTGGTTATTCATCTGCGGACTCATATGAGCGAAGCTCTCGGTATCACTGCATTTTATATATTCATAGCCGCAATTATTGTTGCTG
CAGTGCTATACCTTGAACAACGCTGGTAGCGCCTGGTTTTATTTATTTTCCAGCTCAATAGCAAATTCAGATCAAATCAGCCTCGCAAATCATAGATTCA
TAACCAATAATGTGCTGTTATGTATACATGCAAAAACAAGGAGAGAATGCTTATGTACAAAACAATCATCATGCCAGTGGATGTTTTCGAAATGGAATTG
AGCGACAAAGCGATTCGCCACGCTGAATTCCTCGCCCAGGATGACGGAGTTATTCATCTACTTCACGTACTACCGGGGTCAGCCAGCCTGAGCCTGCACC
GTTTTGCCGCTGATGTACGTCGTTTTGAAGAGCATCTGCAACATGAAGCAGAAGAACGTTTGCAAACGATGGTCAGCCACTTCACCATCGATCCTTCCCG
CATTAAGCAACATGTCCGTTTTGGTAGTGTGCGGGATGAAGTTAACGAGTTAGCGAAAGAACTTGATGCAGATGTAGTAGTGATTGGTTCGCGTAACCCA
TCAATTTCAACTCATCTGTTGGGTTCTAACGCCTCGAGCGTGATCCGCCACGCCAATTTGCCGGTGCTGGTTGTGCGTTAATTGCCAGAATAAGTATCCC
GCCCTGCCCGGAGCCATCCCTGCAGGGCTTTTTAATGCAATAAAAAAGCCGCCAGATTTGACCCCGGCGGCTAAGCAATTGCAGGTGAATCTTACTTCTT
CTTATGCAGTTTTGGTGCGAATCAGGTAGTCAAAAGCACTCAGAGAGGCTTTGGCACCTTCGCCAGTGGCGATGATGATCTGCTTGTACGGAACCGTCGT
ACAGTCACCCGCTGCGAACACGCCTTTGACGTTGGTTTCGCATTTCGCATCAATGATAATCTCGCCCATGCGATTACGTTCGACTGCGCCTTCCAGCCAG
TTGGTGTTCGGCAGCAGACCAATCTGGACGAAAATACCGGCCAGTTCGATGTTGTGAATATCGCCGCTGACACGATCGCGATATTCCAGACCTACGACTT
TGCTACCGTCGCCTTTCACTTCCGTGGTTTGCGCATTCAGAATAATGTCGACGTTTTTCAGGCTGCGCAGTTTGTCCTGCAGAACCTGGTCGGCTTTCAT
TTCTGGCGCAAATTCCAGCAGCGTTACGTGCTCAACGATACCCGCCAGGTCAATTGCCGCTTCCACGCCGGAGTTACCGCCGCCGATAACCGCTACGCGT
TTGCCTTTAAACAGCGGGCCGTCGCAGTGCGGGCAATAGGTCACGCCTTTGGTGCGATACTGATCTTCGCCAGGAACGTTCATGTTGCGCCATTTTGCAC
CAGTCGCCACGATAATGCTGCGTGCTTTCAGTACCGCGCCAGAAGTTGTTTCAATCTGATGCAAGCCGCCTTCAACCGCTGCCGGGATCAGTTTGCTCGC
GCTCTGGCTGTCGATCACATCAACGTCGTATTCATCAACATGAACTTTCAGCGCACCTGCCAGTTTCTGGCCTTCGGTCTTCGGTACAGAAATGTAGTTT
TCGATATCAACGGTATCGAGGATCTGACCACCAAAACGTTCGCCCATCAAACCGGTACGGATGCCTTTACGTGCGGAGTAAATTGCTGCCGCTGCACCCG
CCGGGCCGGAACCAACGATTAATACGTCATAAGCATCACGCTTATTCAGCTCTTCTGCCGCACGTTTTTCCGCACCAGTATCAATTTTGGCAACGATTTC
AGTCAACGTCATGCGGCCCTGACCAAACTCTTTCCCGTTTACGAACACTGCCGGAACGCCCATCACGTTGCGATCGGTGATTTCGTTCTGGAAGGTGCCG
CCGTCAATTGCAGTGTGCTTGATGCGCGGGTTCAGTACGCTCATCAGGTTCAGCGCCTGCACCACGTCCGGGCAGTTGTGGCAAGAGAGCGAGTAATAGG
TTTCGAATTCAAAATCACCGTCAATATGGCGAATCTGCTCCAGCAGAGACTGCGCTTCTTTCGACGGATGACCACCGGTCCACAACAACGCCAGTACCAG
CGAGGTGAACTCGTGGCCCAGCGGGGAGCCTGCAAAACGTGGTCCCTGGTTGGAACCTGGGTTGGTGATCAGGAAAGACGGCTTACGCACCGGCAAGCTG
TTATCTTCTTTAAAGGTGACTTTGTCTGACAGTTCTGCGATTTCAGCCAACAGTTCCTTGATTTCTGCCGATTTAGCGCTGTCATCCAGCGTGGCAATTA
ACTCAACAGGCTTGGTCAATTTCTCAAGGTAAGCCTTGAGTTGAGTTTTCATATTTGTGTCGAGCATGTTTATCTCCTGGGCTTTAAACATCATCATGCA
AGCGGCCTCTGCGGCTAGCTGGATGCAGCTTGCATCATGGTGCGGGGAAGAAAATCGGGTGCCGCAGCACCCGAAGAATTAGGTGAATTTCCGAAGTATC
TCGCGCCGGAGTTAGTAGCGCGAAAGACAAAGGAAATTTAGATTTTACCAACCAGGTCCAGAGACGGAGCCAGAGTTGCTTCACCTTCTTTCCATTTAGC
CGGGCAAACTTCACCTGGGTGAGAAGCTACGTACTGTGCTGCTTTGATTTTACGCAGCAGGTCAGACGCGTCACGGCCAATGCCTTCAGCGGTAACTTCG
ATTGCCTGGATGATACCCTGCGGGTCAACAACGAAGGTCGCACGGTCAGCCAGACCTTCATCTTCACGCATGTTGTCGAAGTTACGGGTCAGGGCGCCAG
TCGGGTCGCCGATCATCGCATATTTGATTTTAGCGATGGTTTCAGAGCTGCTGTGCCATGCTTTGTGGGTGAAGTGGGTATCGGTAGATACTGCGTATAC
GTCTACGCCCAGTTTCTGCAGTTCTTCGTAATGGTCAGCAACGTCACCCAGTTCGGTCGGGCATACGAAAGTAAAGTCAGCCGGGTAGAAGAAGAAGACG
CTCCAGCGGCCTTCGGTATCTTTTTCGGTGATTTCGATGAATTCGCCGTTTTTGAATGCCTGGTTTTTAAAAGGTTTAATTTTGGTGTTAATCAAGGACA
TCTATACTTCCTCCGTGTTTTCGATGAGATGTAAGGTAACCAATTTTTGCCGATTCGGCTAATGCGTTTCCATTATCAAATCGATAAGTTTTACCTTACA
ACCTTCGTAAGACAACTTTGTGAACTTTGCACCGCCAGCGGCGATAAAAGTAAAATGGCCCCCTTTCCAGGTGACCGTGTAATCTGAACTACCCTTTGGT
ATCTTCAGCGCCTGCCTGCAGGCTGAGGTGTTGCCCTTACAAATGCAACAACGACATGGATTACAACACCCTCATAAACAAAGGGCAATCACCTGATCTA
AGCTCTTACCTATGACAGTGATAGGTTATGCCTTTTACTCGACTTTTGCACTGACTGAAAAGGACAAATTAATGTTAAAAAAGATACTTTTACTGGCCCT
GCTTCCTGCAATCGCCTTCGCAGAGGAACTTCCTGCCCCAGTAAAAGCGATTGAAAAACAGGGTATTACAATCATCAAAACGTTCGATGCCCCTGGAGGA
ATGAAAGGTTATCTCGGTAAGTATCAGGATATGGGCGTCACCATCTACCTGACTCCAGATGGTAAGCACGCTATCTCTGGTTACATGTACAACGAAAAAG
GTGAAAACCTGAGTAACACACTTATCGAAAAAGAAATTTACGCACCCGCCGGACGTGAAATGTGGCAACGGATGGAACAATCCCACTGGCTCCTCGACGG
TAAAAAAGACGCGCCGGTCATTGTCTACGTCTTCGCCGATCCGTTCTGCCCATATTGTAAACAGTTCTGGCAGCAGGCTCGTCCGTGGGTAGATTCTGGC
AAAGTGCAATTGAGAACATTGTTGGTTGGGGTTATCAAGCCAGAAAGCCCGGCGACAGCAGCGGCAATTCTTGCCTCCAAAGATCCCGCAAAAACCTGGC
AACAATATGAAGCCTCTGGTGGCAAGCTTAAGCTAAGCGTGCCTGCAAACGTAAGTACAGAGCAAATGAAAGTGTTAAGCGACAACGAGAAACTCATGGA
CGATCTGGGGGCAAATGTCACACCAGCTATCTATTACATGAGTAAGGAAAATACCCTGCAACAAGCCGTCGGATTACCCGATCAGAAAACACTTAATATC
ATTATGGGGAATAAATAGAATATAATTCATCGATGGTTGAAATCTCTCTCTGCTTTTCAACCATCTTTAAAACGCATGAATTGCTCGTAACCCACCTGAC
AGCTATGCTATTTTAGAAAATCTTAATCCAAAGTTAAGCAGAAAAACATAATACATATAAATACAACAACATTATTGATCAAGTGAATGATTTATGGAAG
AGACAATACAGCGGAGTATGTTATGGCTAATCTTTATGATCTAAAAAATTTGACCTCAATTTACTGGTCATATTTGAATGTATTTATCAACATCTCAGCA
TTAGTAAAGCGGCAGAATCATTATATATAACGCCCTCTGCTGTTAGTCAGTCGTTACAACGTTTACGTGCGCAATTTAATGACCCGTTATTCATTCGCTC
AGGGAAAGGTATCGCGCCGACTACAACAGGGTTAAACCTGCATCACCATCTTGAGAAAAATCTCAGAGGCCTTGAACAAACGATCAATATCGTTAATAAG
TCTGAACTAAAGAAAAATTTTATTATCTACGGTCCTCAGCTTATTTCTTGTACTAATAACAACATGCTAATCCGCTGTCTTAGACAAGATACTTCAATCG
ATATAGAATGCCATGACATCCTGCTTTCAGCTGAAAATGCCGAAGAACTGTTGGTTCAACGCAAAACTGACCTGGCAATTACGCTGCAACCAGTAATTAG
TCGCTCTGTCATCTGCATGCCGTTACACACTATTCGCAATTCCCTTATATGTAGCAACAAACATCCTCGTATTACTGATACCAGTAACTATGAACAAATT
ATCGCCGAAGAATTCACCCTGTTGATATCTAAATCAGCAGGGATTGACGAAATTCAAATGGACATAGATGAACGTTTTATGAACCGTAAAGTTTCATTTC
GCAGTTCTTCTTTGATGACTATAATTAATAGTATTTCTGTTACTGACTTATTAGGCATTGTGCCCACCGAACTGTACGATTTACATCGTGACTTTTTGAA
GTTAAAAGAAATAAAACTGGAACAATCTCTTCCTGCGGTTAAACTTTATATTTCCTATAACAAGGCTTCGTTGAACAACCTTGTCTTCTCCCGATTCATA
GATCGTTTAAATGATAGCTTCTGATTCATTACCACTGACAAATAATATATTACGCATCAATTAATTCATTGTGTGAATATAAAATAATGTGCTCTATCTT
GCTTCGTTTATCCTATAATTAGCGGATTCATCTCACGAATCACCCCGTAACGTTCAGAGAGCGTTTTTAGATGTCTATTTATAAAATCCCGCTTCCACTG
AATATTCTGGAAGCTGCAAAAGAACGTATTACCTGGACACTTAATACCCTACCCCGTATCTGTGTTTCTTTTTCGGGTGGTAAAGATTCCGGATTAATGC
TGCATCTGACAGCCGAAATTGCCCGACAAATGGGCAAAAAAATCTGCGTTTTGTTTATCGACTGGGAAGCGCAGTTCTCATGCACTATTAACTATGTTCA
GTCATTACGTGAGTTTTACGCCGATGTCATCGAAGAGTTTTACTGGGTTGCGCTCCCGCTTACGACGCAAAATTCCCTTTCTCAATACCAACCCGAATGG
CAGTGCTGGGAACCTGATGTCGAATGGGTGCGTCAGCCCCCGCAAGATGCGATAACCGATCCTGACTTTTTCTCCTTTTACCAGCCTGGTATGACCTTCG
AACAATTTGTGCGTGAGTTTGCCGAATGGTTTTCGCAAAAGCGTCCGGCGGCGATGATGATCGGCATCCGTGCAGATGAGTCCTACAACCGTTTTGTCGC
CATCGCCAGTTTAAATAAACAACGTTTTGCCGATGATAAGCCCTGGACCACCGCCGCACCAGGCGGTCATAGCTGGTACATTTACCCCATCTACGACTGG
AGAGTGGCTGATATCTGGACCTGGTATGCTAACCATCAACAGCTCTGTAACCCACTGTATAATATAATGTATCAGGCAGGCGTTCCTCTGCGTCATATGC
GAATTTGCGAACCTTTTGGCCCGGAGCAACGGCAAGGATTATGGCTCTATCACGTTATCGAACCGGATCGCTGGGCTGCTATGTGCGCACGAGTCAGCGG
GGTAAAAGTGGCGGCATTTACGCCGGACATGATAATCATTTTTATGGTCATCGGAAAATCCTCAAGCCAGAACATTTAGACTGGCAAGAATATGCATTAT
TGCTGCTCAATAGCATGCCGGAAAAAACAGCTGAGCATTACCGCAATAAAATCGCCATTTATTTGCACTGGTATCAGAAAAAAGGCATCGAAGTTCCACA
AACCCAGCAAGGGGACATTGGCGCGAAAGATATCCCCTCCTGGCGGCGAATATGCAAAGTTTTACTCAATAACGATTACTGGTGCCGGGCATTATCATTT
AGTCCTACGAAAGCGAAGAACTATCAGCGTTATAACGAACGGATAAAAGGAAAACGTCAGGAATGGGGGATACTATGCAACAACGATTAACGCAGGATTT
AACCCAATTTCTCGCCAGCTTGCCGGAAGATGATCGCATCAAAGCGATTAATGAAATCCGCATGGCGATCCATCAGGTTAGCCCCTTTCGTGAAGAGCCA
GTGGATTGCGTTCTGTGGGTTAAAAACAGCCAACTTATGCCTAATGATTACAACCCAAACAACGTGGCACCACCCGAAAAAAACTGCTGAAAAATCCATT
GAAATAGATGGTTTTACCCAACCCATTGTGGTCACGCATACGGATAAAAATGCCCTGGAAATCGTGGATGGTTTTCACCGCCATGAAATTGGTAAAGGCT
CATCATCGTTAAAATTACGCTTAAAAGGTTATTTGCCGGTGACCTGTCTGGAAGGTACGCGTAATCAACGCATCGCCGCGACTATTCGTCATAATCGCGC
TCGTGGACGTCACCAAATCACTGCCATGTCAGAAATCGTCCGAGAACTCAGCCAGTTGGGATGGGACGATCATAAAATTGGCAAAGAGCTGGGAATGGAC
AGCGACGAAGTGTTGCGCCTGAAGCAAATTAACGGCCTGCAAGAGTTGTTTGCCGACCGTCAATTTTCCCGCGCCTGGACGGTTAAATAACTACAGCTGG
CGCAGGCGTTCTGCTGCTGCCAGCAACGTCGATTCCTTCTTGGCAAAACAGAGACGAATCAGTTTATGTGGGAAGGGATCGGCGCAAAACACCGACAGCG
GAATCGCCGCTACGCCGTGCTCCCGCGTCAGCCACTGGCAAAACTCAACATCATCCAGCGTAGATACGGCGCTGTAATCCACCAGCAAAAAGTATGTACC
TTCGCACGGTAAAATCTCCAGCCGACTTTCATTTAAGGCATTCACCAGAATATCGCGCTTCTGGCGATAAAAGTCCGGTAACGCAAGATAATGCTCAGGT
TCTGCACGTAGCATATCGGCAAGCGCCAACTGTGCCGGGGTATTCACCGAAAAGGTCAGATACTGATGCACTTTGCGGATCTCGGCGCTGATGGGCGCAG
GCGCAACGCAATAACCCACTTTCCAGCCGGTCATATGATAGGTCTTGCCAAACGATGACACCGCCACCGCTCGCTCACGCAATTGCGGATGCGCCAGCAC
GCTGGCATGGCCCTGTTGTGAAAAATTGATGTGCTCGTAGACTTCATCGCTAATGACAAAAATCTCGTGCCCGGCGATCGCCTGCCACAAAGCGGCGAAA
TCAGCCTGCTGCCAGACAGTTGCACTGGGGTTATGCGGGGTGTTGAGGATCACCAGTCGGGTGCGCTCGCTTAACAATGCGGCAAATTCCTGCCAGTCAA
CGCGAAAATGCGGCGGTTGCAGTGCAATACGTTTCACTATTCCCCCCGAAAGTGCGATGGCGGGGGCGTAACTGTCATAGCTGGGATCAAAACAAATCAC
TTCGTCGCCATTGCGCACCAATGCGGTTATCGCCGCGTATAACGCCTCCGTCGCCCCTGCCGTCACGGTGATATTGCTGTCGACATCCGGTTGATAGCCA
TACAGACGTTCCGTTTTCTGAGCAATCGCCTCGCGCAAGGCCTGCACGCCGGTCATGGGCGCGTATTGGTTTGCCCCCTGGGCAACGTGGTACGCCAGCC
GCTCCTGTAAATAGCGCGGACCATCAAAATCAGGAAAGCCTTGCGAAAGGTTAATCGCCTGGTGTTGCTGCGCCAGCGCGCTCATCCGGGTGAAAATAGT
GGTGCCAAGTTGTGGAAGTTTGCTTTGTGGAATCAGAGGGTTATTTGTCATTTTTATTGTACCTGACGAAGTTGCGTGTTGAAGGCACTATAACACGATG
CTAGTATTTGGCAATCAAGACGTTTAGATGTCTAAATAAAACAATAAGGACAACACAACATGCCTCACAATCCTATCCGCGTGGTCGTCGGCCCGGCTAA
CTACTTTTCACATCCCGGAAGTTTCAATCACCTGCACGATTTTTTCACTGATGAACAACTTTCTCGCACGGTGTGGATCTACGGCGAACGCGCCATTGCT
GCGGCACAAACCAAACTGCCGCCTGCGTTTGAACTGCCAAGGGTAAAGCATATTTTGTTTCGTGGTCATTGCAGCGAAAGCGATGTGCAACAACTGGCGG
CGGAGTCCGGTGACGATCGCAGCGTGGTGATTGGCGTCGGCGGCGGCGCACTACTCGACACCGCGAAAGCCCTCGCCCGCCGTCTCGGTCTGCCGTTTGT
TGCCGTTCCGACGATCGCCGCTACCTGCGCCGCCTGGACACCGCTCTCCGTCTGGTATAACGATGCCGGACAAGCGCTGCATTATGAGATTTTCGACGAC
GCCAATTTTATGGTGCTAGTGGAACCGGAGATTATCCTCAATGCGCCACAAGAATATCTACTAGCGGGGATCGGTGACACGCTGGCGAAATGGTATGAAG
CGGTGGTGCTGGCTCCGCAACCAGAAACGTTGCCGCTAACCGTGCGGCTGGGAATCAATAATGCGCAGGCCATTCGCGACGTCTTGTTAAACAGTAGCGA
ACAGGCGCTTGCCGATCAGCAAAATCAGCAATTAACGCAATCATTTTGCGATGTGGTGGATGCCATTATTGCTGGTGGTGGAATGGTCGGTGGTCTGGGC
GATCGTTTTACGCGTGTGGCGGCGGCCCATGCCGTGCATAACGGTCTGACCGTTTTGCCACAAACCGAGAAGTTTCTCCACGGCACCAAAGTCGCCTACG
GAATTCTGGTGCAAAGCGCCTTGCTGGGTCAGGATGATGTGCTCGCGCAATTAACTGGAGCGTATCAGCGTTTTCATCTGCCGACTACGCTGGCGGAGCT
GGAAGTGGATATCAATAATCAGGTGGAGATCGACAAAATGATTGCCCACACCCTACGCCCGGTGGAATCCATTCATTACCTGCCGGTCACGCTGACACCA
GGTACGTTGCGTGCAGCGTTCGAAAAAGTGGAATCGTTTAAAGCCTGACGTACATATTTAGCAGCAGCGCGCGCCGCCTTTTCCACCGTAGCGCGCGTCC
TGCCGCTCACGGAAAAACTCTTCGTAGGTCATCGGCGTTTGATCGGGATGGTTAACCCGCATATGTTCGACATAGTTGTCGTAATCAGGCATACCAATCA
TCAGTTTCGCCGCCTGACCTAAATATTTTCCGGCTTTTGCCAGTGAATCAAACATCTAAACCTCCGGTAATACAAATGCCCTCCTGAATTAAGAGGGCTT
AATTGCTATCAACACGCTCGGGATGAGAGTAAGGGGAACGCTCAGCACATTCCCCCTCACTCTGACTTTAGTGCGCGCCTTTCGCCTGCGCCACGATCTC
CTCGACATTTTCCGGCATCGGCTCATATGGCGTTTCTTTCGCCGTTGGCTTCGGCTCTTTCAATGCCACCAGTGCCGTCTTAATCGAGAACAGCGCCAGA
ACCACCACAACCACCATAAAGAAGATGGTTAATCCGGCATCCAGACGGTTGTTGAACACCAGTTGCGCCAGTTGTGACTCAGTATACTGCGACGGAATAT
TGCCGCTGTCGATCATTGCCTGGAACTTGTTAGCAATCGCCAGGAAGCCGACTTTCGCATCCGGGCTAAACGCTTTCTGCCAGCCTGCGGTCAGGGTACA
AATCAGCAGCCAGGCCGTTGGTACCAGCGCCACCCAGGCGTAACGTTGACGTTTCATTTTGAACAGCACCACAGCACAGAGCATCAGCGCCATCCCTGCC
AGCATCTGGTTGGCAATACCAAACAGCGGCCACAAGGTGTTAATACCGCCCAGCGGATCGACCACGCCCTGATGCAGGAAGTAGCCCCACGCCAGCACGC
ACAGCGCCGTTGCCAGCAGGTTAGCAGGCAGTGAATCGGTCCGTTTCAGGCCCGGAGACACCACGCCCAGCAGATCCTGCAACATAAAGCGCGCAGCACG
CGTACCCGCATCCACCGCCGTCAGAATAAACAGTGCTTCAAACAGAATGGCGAAGTGATACCAGAACGCCACATCCATCATGCCGCCCAGCGCACCGTGC
AGAATGTAGGCCATCCCCACCGCCAGGGTCGGCGCACCGCCCGCACGAGAAATGATCGACTGTTCACCCACTTCGCTGGCAATCTGGTTTAGCGTATCCG
GGGTAATCGCAAAGCCCCAGCTACTCACCACCTGCGCGGCAGAAGCAACCACATCCGCCGTCCCTGCCGGAGCCAGCACCGCCATCGGGCTGTTCATGGC
GAAGTACACACCCGGATCGATGATACAGGCGGAAACCAGCGCCATAATCGCCACGAAGGATTCCATCAACATCCCACCGTAGCCGATAAAGCACGCCTGC
CCTTCGTTCGCCAGCATCTTCGGTGTAGTGCCGGAAGAGATCAGTGCATGGAAGCCAGACACCGCGCCACAGGCGATGGTGATAAACAGGAACGGGAACA
GGTTACCGGTCCATACCGGGCCAGTGCCATCGACAAATTTAGTTAGCGCAGGCATGGTCAGCGTCGGGCGCATAATCAAAATGCCCACCGCCAGACCGAC
GATAGTCCCGATTTTCAGGAAGGTTGAGAGGTAGTCGCGCGGGGCCAGCAACAGCCACACTGGCAGCACCGCCGCCACAAAACCGTAACCCACCAGCATC
CAGGTCAGCTGCACGCCGGTAAAGTCAAAGTACGGTGCCCAGGTCGGACTTTCTGCCACCCAGCCGCCAGAGATAATGGCGAAAATAAGGAACACCAGGC
CGATGACCGACACTTCGCCAATACGCCCCGGACGCAGATAGCGCAGATAGATCCCCATAAACAGCGCCAGCGGAATAGTGAACGCAACGGTATACGTTCC
CCACGGGCTATGAGTCAGGGCTTTCACCACGATCATCGCCAGCACGGCAAGGATAATGACCATGATCATAAAGCAGGCCACCAGCGCAATCACCCCGGCG
GTTGGCCCCATCTCTTCTTTGACCAGCTCACCCAGCGAGCGACCGTCACGGCGCGTAGAAACAAACAGCACCATGAAATCCTGCACCGCACCGGCGAGAA
CCACCCCGGCGAGCAGCCAGATCATCCCCGGCAGGTAGCCCATTTGCGCCGCCAGTACCGGCCCAACCAACGGACCTGCTCCGGCAATGGCCGCAAAATG
GTGACCGAACAGCACTTTTTGTCCGTCGGCACATAGTCCAGCCCGTCGTTATGGCGCACCGCTGGCGTCATACGCGTCGGGTCAACCGCCAGCACATTTT
TGGCGATATACAGCCCATAAAAACGGTAAGCGATCAGATAGATACAGACCGACGCCACCACAATCCACAGCGCGTTGATCTGTTCCCCACGATTTAAAGC
AATGTATCCCAGAGCAAATGCTCCCATTACAGAGAGCACTGTCCAGACGAGGTATTTCCCTGATTTGTTCATAGTTGTTATCCGTGTGCGTGTCCATAGA
GATGTTACATTTTGTTTCTATAACATCTTTGTACAATTTAACAACACAGCAACCATGTAAATCAGAGTTAAAACCAATATTTAACTTAACAACGTTAACT
CGATCACTCCGTTAACCGAATTTTCCTGCAATCTCATTTTATTCTGTCGGGTTCATCCCAAAACCGCTGTGCCCAGCCGACAGGTGCAGCAACGCCGCCC
CCGTTCATCGAAAACGACGATTTCCCAGCTCTGATTTTGTCGTCCAAGATGCAGCGGCTGGCAGACACCGCGCACCTTTCCCTCAGACACCGGGCGATGA
TGTGTGGCGTTAAGTTCCGTGCCCACCACACACTGTCCGTCGCGGGTCATCATAAATCCGGCCATCGATCCCAGCGTTTCCGCCAGCGCCGCCGACGCGC
CGCCATGCAGCAGGCCAAACGGCTGATGAGTACGGGTATCAACCGGCATTTCGGCTTCCAGCACATCATCGCCCAGACGGGTATACACAATTCCCAGATG
CGCCACCATTGTGTTATCGCTGGTGGCGTTCAGCTCGTCAAGCGTTAAATGGCGTTTCCAGATCATGCTTATGCCCCCAGCGTTGAGCCGCCATCGACCA
CAATATCCTGTAGGGTAATATGGCTGGCGAGGTCAGAGGCGAGGAACAAAATCGTGTTGGCGATCTCTTGTGGACGGGCGATTTTCCCCAGCGGAATGCC
GAGTTTAAACTGCTCGCCAAAGCCGCGAATACGCTGCTCTTCGGCGTCATCGCTCACCCACAGCGTGCGTTGCATATCGGTGTCGGTGGAGCCTGGCGAA
ACCACATTACAGCGCACGCCGCTACCCGCCAGTTCCAGCCCAACGCTCAACGCCAGGCTTTTCAGCGCCGCTTTCGACGCGCCATAAGCACTCATACCAA
TGCGCGGCGTGTGTGCGGCGTCGGACGCAACAGTAACAATCGCCCCGCCCCGCTGACGGCGAAACTGGTTCATGGTCTGCTGGAACAGGTTAAACGCACC
GCCGACGTTGACCGCAAAAGTCTGCTGCCAGTCCTCCTTACTGAGCTGATCGGTCGCGCCCATGCGCAAAATTCCCGCCGCATTGACCAGCACGTCCAGT
CGCTCCGTTTCAGCTAACAGTCGCTGACATACCTGCGCCACCTGCGCAGCATCGGCAACATCCATTACTTCGGTCGCAAAAGGATATTGCTCCTGAGTAA
ACGCTTGATCAAAACCTGTAACTTTCGCCCCCGCCTCAACAAATGCCAGCGCCGTGGCGTAGCCGATACCTTTCCCCGCGCCAGTTACCCAGACATTTTT
ACCGCTGAAATCCATTATTTCACCTCGCGGGAAAGTAGCTTCCACCAGGCGTCGATGGTCGGGTTTTTCGCCAGCATGACAAAGTCGATATCGCCATGCA
CTTTGCGCCAGCGCGCCGCCAGCGCCATCATGCGCACCGAATCCAGACCGTAGTCGATCAGGTTGTCGTCATCGAAGGGTTCATCGGACTCGTCCAGCAA
CGGCAGGATCACCTCACGCAGCGCCGCTTTGCTGGCGGGGATAGGTGCTGGCAGCAATTCTTCGGTCATCACCACCCGACCAGAACGTCCGGCCACATAT
TTCAGCGACATCAAATGCTCGTCACGGCTGAAATCGGCCAGCGCATCTGCCACCATAAACGGTTTAATATCGCGCATAAATGCGTCCGTTGCGGTGGTCA
TACAGCCAATGTGGGCATATACCCCGGTAATAATCAGCTGGTTACGTCCACTCTCTTTCAGCATTTGCTCCAGCGGGGAACGATGAAACGCGCTGTAGCG
CCACTTCACCAGCACCGTGTCGTCGGCATCTGGCGTCAGGCGATCCACCACCTTTTGCTGTTCCGGCGAACGGGTCAGGCCTGGCCCCCACATATCATTC
AACAGCGCCCGATCTTCATCGCTCTGCTCTTTCGGCTGGGCGGTGTAATAAACCGGGATATTGTGCTGTTTGCAGTAGTCGCGTAGTGTCGCAATATTCG
CGATCACCTGCTCCATCATCGGGCAGTTCTCACCCCAGAAGCTGACAAAATAGTCCTGCATATCATGGATTAACAACGCGGCACGTTGCGGTTCAAAGGC
CCAGTCGACTTTATTCTGCGGAATATCGTGAGACTCCGGCAGTGCGTAAGCCTGTAATTTTGGAATAGCCATCGTGTTCTCTCCTTCAGGCTGATGTGCG
TGACGCCAGCCACTGACGTAATTGTTTTTTATCGACTTTCCCGACCGCCGTCAGCGGAAGTGAATCTACACACTCCACGCGATCCGGTAATTTAAATTCG
GCAATACCCTGTTCACGCAGGAAACGACGCACCTGCACCGCGCGCAGCGGCTCTTTTACCACCAGATAAGCACAGCTTTTTTCGCCCATCAGCTCATCTT
CCATGCTCACCAGTGCAGCGTAGATCACCGCCGGATGGCGCAGCAGCAGGTTTTCGATCTCTTCGGCAGCGATCTTCTCGCCGCCACGGTTGATTTGATC
TTTCTCGCGCCCCTGCACAGTGATGTAACCCTCTGGATCAATAGAGATCAGATCGCCGGAACAGTAAAAACCGTTGGCATCAAAGGCGCTGGCATTGTGC
TGCGGGCTTTTGTAATAGCCACGGAAGGTGTACGGCCCGCGCGTCATCAGGCGTCCAACTTCTCCTTGCGGCAGTGGATTTCCTTCAGCATCGGCAACCC
ACACTTCATCGTCCGGGCACATTGGGTAACCCTGGGTATGGATAATTTTCTCCGCACTATCATCAAGACGGGTGTAGTTCACCAGCCCTTCCGCCATGCC
AAACACCTGCTGCAACTGGCAGCCAATCTCAGCGGGAATACGCGCCGCAAGCGTGGCAGAAAGACGGGCGCCGCCGACCTGTAACAGTTTCAGCGAGGCA
AGCTGCGTCCGGCTTTCGCCTTCGGTCAGCGCTTGTAACCACAGGCTGACTGCTGGTGGCACCAGCGCGGTGACGTTCACCTGATGTTTTTCAATCAATG
GGAAGCAAAGCGTGGCGCTGGGGTCGGCAGCCAGAACGACAGTGCCGCCAGCGAGAAATACCCCCAACGATCCCGGTGAACTCATGGCGTAGTTGTGGGC
CGCCGGGATCGCACACAGGTAGCGCGTCTGTTGTGTGAACTGACAAATCTCGACGCTACGACGCACGCTGTAGTAGTAGTCGTTATGAGTGCGCGGGATC
AGTTTCGGAGTGCCGGTGGTGCCGCCGGAAAGCTGGAAATAGGCCACTTCATCAGCAGGAGATGGCGTGGCAGTAAAATCCTCAGCCGGATGGTTAATCG
CATCCTGCAAGTTATGCTCGCCGCTGTCGTTGAGCAGCTGCACCACGCGAATGGAAGAATGCTCTGCAACAAATGTGTTGAGGAAATCATCCCCGCTAAA
TAGCGCATGTTGGCGATCGGCAATCAGTAACGCCGGTTCAATCTGGCTGGCATAGGCGTTCAGTTCACTACGCTGATGGCTGAACAGCGCCAGCACCGGC
GCAACGCCCAGTTTCAGCAGCGCGAAAAAGGTAATGTAAAGTTCAGCGACGTTACCCAGTTGTACCAGCGCGGTTTCACCAGGTTTAATGCCCTGACGGC
GCAAACTACAGGCGAGGTTATCCGCCGCCTGATTCAGCTCCCGGTAACTCAACTGCCGCTCGCCGTCGATAACCGCGATGCTGTCACTCGCAGCGTGGCG
AGTCAGAATGTCGGTCAGTGGCAAATCCTGCCAGTAGCCTTTTTCCCGATAGCGACGGGCAAACTCTTCCGGCCAGCGGGTGAATGGAATGCTCATCCTC
GCTCCTTAATGCAATCCAAAAACGTTCAACATGGTAGAAAGTTTGACGCCTGTTTCGCGCCACTCACCCAACGGTGAGGACGCAGGCACAATCCCCGCTC
CGGCAAACAGACGCACCTGATTTTCCCGCAGCTTCGCGCAGCGGATGGTCACCACCCATTCACCGTTACCTTCGCTGTCACACCAACCCACAATGCCGCC
AAACAGTTCGCGGTCGAACGGCTCCAGTTCAGCAATAACCTGAGTCGCGGCCTGATGCGGAAACCGCTCAGCGCGGGGGTCGGATGCAGCAGACAAGCCA
AAGTCAGTGCGTTTTCTTGCGAATTCGCTTTACCTTCAAAGGGCGTTGCGAGATGCCACAGCGTCGGCGTGGTAATCAATTGTGGAGAGGAGGGAACGTG
TAACTCACTACTGCGTTTGCGCAGTACCTCTTTCATCGCCTGAGTCACCAGTTCATGTTCATGGCGATCTTTTTCTGACGCCAGCAGACGATTACCCGCT
TCGCGATCGAGCACTTCATCCGGCTGACGACGCGCGGAACCGGCTAACGGAATGGAGCTAAAACGCTCGCCGTCTTTACGTAGCAGCAGTTCCGGGCTGG
CCCCCAGCAGAACGCCACCATCAGCCAACGGAACATGGAAGTTGTAACTAACCGGGTTTTGCGCAATCAACCGTTCCAGCAATACGCCACTATCAATGGC
GGCGTCAGTGGTGATATCAATCAACCGTGACAACACCACTTTGTCGACCTGCGGCGTGGCGGTAAGTGCGGCAGCACGGGCAACCATCTGTTCAAACGTG
GTTTGTTCCGGAATGGCCTGACGTTCCACCACGTTCAGCGACTGGCTGCGGGTGAAACGGCGTGCGGAAGCTTGTTTTTCCTGACGGGAGAACGACTGCC
AGGATTCAGGTATATACAGCGACGAAGGCTGACGTGGATCGAAGGGAATCGCCCCGACCATCACCGGATTTTTGATGCCCTGCGCTTTGGCATCGGCAAA
CAACGCGGCGAGTTTTTGCTGGAAGGGACTGTCGGGCGAATCCCCGTTCACAGCCGGTTCATCGAAGCGGGCGAAACATCCTGACGTCGTAAAACTGCGG
TACGGCGACATAAAGAAAAAGCGATTGGGCGCAAGTGTTGCCATGGTCTGCTGTACTTCCTCAGCCAGTGACGTATCCATATCATCCTCCACAAAATGAT
AAAGGCTTTAATAATGATTATCATTTATATTTTCGGTCGCTAACCTAAAAGCAAACGCGCACTATGTCAACTCTTGAGGTAACGCAATCTGCAACTCGGG
GTTGCATCTGTTTGTGGTTACAATGAAAATGAGAAGCATTAACTCTATTAATAACAGGAAGCTAATTTGTGAGACTCGCCCCGCTCTACCGCACCGCCCT
TCTATTAACAGGACTTTTGCTTTCAGGAATAGCCGCAGTGCAGGCCGCCGACTGGCCGCGTCAGATTACTGACAGCCGTGGCACTCATACCCTGGAAAGC
CAGCCGCAGCGTATAGTTTCCACCAGCGTCACCCTGACCGGCTCACTGCTGGCGATTGATGCTCCGGTGATCGCCAGCGGCGCGACCACGCCAAATAACC
GCGTCGCGGATGACCAGGGCTTTTTACGCCAGTGGAGCAAGGTGGCGAAAGAACGCAAACTGCAACGGCTCTATATCGGCGAACCGAGTGCAGAAGCCGT
TGCCGCGCAAATGCCGGATCTGATTTTAATTAGCGCAACCGGCGGGGATTCGGCGCTGGCGCTGTACGATCAGCTTTCTACCATCGCCCCAACATTAATC
ATCAATTACGACGACAAAGCTGGCAGTCGCTGTTAACGCAGCTTGGCGAAATTACCGGGCATGAGAAACAAGCGGCAGAGCGGATTGCACAGTTTGATAA
GCAACTGGCGGCGGCGAAAGAGCAAATCAAATTACCGCCGCAGCCGGTCACTGCCCTTGTCTATACCGCCGCTGCACACAGTGCCAATCTCTGGACGCCG
GAATCAGCACAAGGGCAGATGCTGGAACAACTCGGCTTTACGCTGGCGAAGTTGCCCGCAGGGTTAAACGCCAGCCAAAGCCAGGGCAAACGCCATGACA
TCATTCAGCTTGGTGGAGAAAATCTGGCTGCAGGGTTAAATGGCGAGTCACTATTCCTGTTCGCCGGTGATCAGAAAGACGCCGATGCTATTTATGCTAA
TCCGCTGCTCGCGCACCTGCCTGCAGTACAAAACAAGCAGGTTTATGCGCTGGGAACCGAGACGTTCCGCCTGGATTACTACAGCGCCATGCAAGTGCTG
GATAGACTTAAGGCGCTGTTTTAAGCATTAACTGTCGGACGCTGTCACCTGCGGCGGCGTCTGGCGAAAACGTCGCAACTCCACTAGTACCAGCAGCAAC
AACACGCCGATAATCAACAAACCAAAACCGCTCGCGCTTGCGGAAGCAACCGGTGTCATCATCGCTCCCAAACCGCCCAGCAGCGCCGCGCCTATGGCAT
CGCCCGTCACGTTTTGCGCCGTCCACAAACCGTTAATCCGCCCTAACATCGCTTCCGGGGTTTGCGTTTGCAGCATTGTATATTGCAGCAACGAACTAAC
CGCGCTCAGCCAGCCGAACAGCGCCAGACAAACCACGCCTAAAATCCACATCGGCATCAGGCCAAACAGACCAATGGCGAGGAACGCCCCCAATGTGGAG
AGCAACATCAACAGACCTGGCCGTACGCTATGCGCCAGTTTTCCACTGGTTAACGCGCCAATAGCCGCACCGAGCGGGATTGCCGCATAGAGAAAGCCAA
TTTGCGCCGCCGACATCTGCCAGTTGTCAGCCAGCGCCGGATACAGGACCCGCACCGCGCTCGCCATCGTCAATAACCCCCCAGCAACGCAATCCCTCCC
ACCAGCGGGCTGGCGAGTAGAAAACGAAATCCTGCCAGTAATGATTTCAACGGATGCTCACGCGGCTGCGGCGGTGGTGGCAACGCCGGAAGGCTTAACA
ACGGTAGCAAGGTAATAAACGTGCCCGCCGCCGCCAGCCCGTAGTTCCAGGCTACGCCTCCGGTCGCCAGCAGTAAACCGCCAATCATGGGCGAAATCAC
CGATCCCAGACGCACGGTCAACATGGTGATCGCCCCGGCCTGCATTAGGTTTTCACGCCCTACCAGTGCAGGTGTCGCCGCCAGTAGCGCCGTAACGCCA
AGTGATGCGAAAAAACCATCCCATAAACCAAGTAAATAGATTGCCAGCAAAGACGGCTCCGGCAGCAGCGCATTCAGGCACAGTCCAATGAAGCCAATGC
CACAGGTGCCGCGCGCCAGCAAAATCACTTTTTTACGCTCATAGCGATCCGCCAGCACACCGCCGACCATCAGGCCAACAAACATCGCGCCGCCGGTCAG
CGTCACCGAAAGCCCCACCTGCCAGGTAGAATGCGTCATTATCTGGATCTGCACCGGCACCGCGACGCCGAGCAAACCCAGAGAAACAATTGAGATAAAA
CGAGCGAGGAATACTGCGCGAAACGCCGGGTGCGTTTTCAACAGGCTGAGGTTAAGCAGCCAGGATTGTTTATTCATTACAATGCTTTGCCATCAAATAT
TTTAAATACCTATTCTTAGGCTGCACATGCTAACATATCCAAATAAGATCGATAACGATAATTAATTTCATTATCATGGAAGTTCGTATGTCTGGTTCTG
TTGCCGTGACACGCGCCATTGCCGTGCCCGGATTGCTGTTATTACTGATTATCGCGACGGCATTAAGCCTGCTCATTGGAGCAAAATCACTCCCCGCTTC
CGTAGTGCTGGAAGCCCTCTCCGGCACCTGCCAGAGCGCCGACTGCACCATCGTGCTCGACGCACGACTGCCGCGCACCCTTGCCGGTTTACTGGCAGGC
GGTGCGCTTGGCCTTGCCGGGGCGTTAATGCAAACCCTCACCCGAAACCCACTTGCCGACCCCGGCTTACTTGGCGTGAATGCCGGAGCCAGCTTTGCCA
TTGTGCTGGGTGCGGCGCTGTTTGGTTACTCATCCGCGCAGGAGCAACTGATGATGGCCTTCGCCGGCGCGCTGGTGGCGTCATTGATTGTTGCCTTTAC
CGGCAGCCAGGGCGGCGGGCAGTTAAGTCCGGTGCGTTTAACCCTGGCGGGCGTGGCGCTGGCGGCGGTGCTGGAAGGGCTGACCAGCGGCATCGCCCTG
CTTAATCCTGACGTCTACGATCAACTGCGTTTCTGGCAAGCCGGTTCGCTGGATATTCGCAATCTACATACCTTAAAAGTGGTGCTGATCCCGGTGCTTA
CCGCCGGAGCAACCGCGCTATTACTGAGCCGCGCGCTGAACAGTTTAAGCCTTGGCAGTGACACCGCGACGGCGCTGGGCAGTCGCGTAGCGCGCACACA
GTTGATTGGTCTGCTGGCAATTACCGTGCTTTGTGGTAGTGCGACGGCGGTAGTTGGCCCGATTGCCTTTATTGGCCTGATGATGCCGCACATGGCGCGC
TGGCTGGTAGGTGCCGATCATCGCTGGTCGCTGCCCGTCACGCTACTCGCTACCCCTGCCCTGCTGCTGTTTGCCGATATCATTGGGCGGGTGATTGTTC
CCGGCGAACTGCGCGTTTCTGTAGTCAGTGCCTTTATTGGTGCACCAGTGCTGATCTTCCTCGTACGACGTAAAACGCGAGGTGGCGCATGATTTACGTC
TCTCGCCGATTAATTATCACCTGTCTACTGTTGCTAATAGCTTGTGTAATGGCAGGCGTGTGGGGATTACGCAGCGGTGCCGTCACGCTGGAAACCTCGC
AGGTATTCGCCGCGCTGATGGGCGATGCGCCGCGCAGTATGACGATGGTGGTCACCGAATGGCGTTTACCACGCGTGCTGATGGCGCTGTTGATTGGCGC
GGCGCTGGGCGTCAGCGGCGCGATTTTTCAGTCGCTGATGCGTAACCCGCTCGGCAGCCCTGACGTAATGGGCTTTAACACCGGGGCGTGGAGCGGCGTG
CTGGTGGCGATGGTGCTGTTTGGTCAGGACCTGACGGCTATCGCCCTGGCAGCAATGGTGGGCGGCATTGTCACTTCGCTGTTGGTCTGGCTGCTCGCCT
GGCGTAACGGTATCGACACCTTTCGGTTGATTATTATCGGTATCGGCGTTCGCGCCATGCTGGTGGCCTTTAATACCTGGCTGTTGCTGAAAGCGTCTTT
AGAAACGGCGCTAACAGCGGGTTTGTGGAATGCCGGATCGCTCAATGGCCTGACGTGGGCAAAAACCTCACCTTCCGCACCCATCATTATATTAATGTTA
ATTGCCGCTGCCTTGCTGGTGCGGCGAATGCGCTTGCTGGAAATGGGCGATGATACCGCGTGTGCGCTGGGCGTCAGCGTCGAACGTTCGCGGCTGTTAA
TGATGCTGGTCGCCGTAGTGCTTACCGCAGCTGCCACTGCCCTGGCGGGGCCGATTTCCTTTATTGCTTTAGTCGCGCCGCACATTGCCCGACGCATTAG
TGGCACCGCTCGCTGGGGGCTGACCCAGGCGGCGCTGTGCGGGGCGCTGTTACTGCTGGTGGCCGATCTCTGCGCCCAACAACTGTTTATGCCGTATCAA
CTTCCGGTTGGCGTCGTTACCGTCAGCCTCGGCGGTATTTACCTTATCGTCTTGTTAATTCAGGAGTCTCGCAAAAAATGACCGAATCAGTAGCCCGTTT
GCGCGGCGAACAGTTAACCCTCGGATATGGCAAATATACCGTTGCGGAAAATCTGACTGTAGAAATACCTGATGGTCACTTCACGGCGATTATCGGGCCA
AATGGCTGTGGTAAATCCACGTTACTGCGTACCTTAAGCCGCCTGATGACGCCTGCTCACGGGCATGTCTGGCTGGATGGCGAGCACATTCAACATTACG
CCAGTAAAGAGGTTGCACGCCGGATTGGTCTGTTGGCGCAAAATGCTACCACTCCGGGCGATATCACCGTGCAAGAGCTGGTGGCGCGTGGGCGTTACCC
GCATCAACCGCTATTTACCCGCTGGCGCAAAGAAGATGAAGACGCGGTAACAAAAGCGATGCAGGCCACGGGAATAACTCATCTGGCGGATCAAAGCGTG
GACACCCTTTCTGGCGGACAACGCCAGCGAGCGTGGATCGCGATGGTGCTGGCCCAGGAAACGGCAATTATGCTGCTCGACGAACCCACGACCTGGCTGG
ATATCAGTCATCAGATTGATCTACTGGAACTGTTAAGCGAACTGAACCGCGAGAAAGGCTATACCCTCGCGGCGGTGCTGCACGATCTTAATCAGGCCTG
TCGTTACGCCAGCCATTTGATTGCATTGCGGGAAGGGAAAATTGTTGCTCAGGGAGCGCCGAAAGAGATTGTCACTGCTGAACTGATCGAGCGCATTTAT
GGTCTGCGCTGCATGATAATTGACGATCCGGTTGCCGGAACGCCGCTCGTGGTGCCGCTCGGACGAACGGCACCTTCAACCGCAAAGATTTAAACTAAGT
GGTCTGCCATCATGGCATCCTGTTTTCTGGATGCCATCGCATGACGCAACAGCACACCACCACAAGCCACCATCCCGCCGATCAACGCGGAAAGGATCAC
AATAATAGCCTTACCCGGACCGTCTTTTTTCACCGGCAACGATGGGCTTAATTGATATTTAAACGGAATGAATTTAACGTCATCAACATTTGCTTTTGTT
AATTGCTCAACAAGATATTGACGATTACGTAATTCACCGTTCAATTCCGCAACGTCAGTAACCGCTTTTTCAATTTCCAGTTTACGTCCAATACCATCAG
CGCCGAGAGAAATAGAGAAATCGGGATCATCTTTAACGGCCTGACCATTACTGTATACGGGCTTTTTAATTCCTGCCGCGTTGGCAATGTCGAGTGAATA
ATTGAGGCGCTGAATGTTTGCATCAAGTTGATTTTTCGTTTTAATGCGATCCTGAGCCAGTTTTTCTTTTTCAAACTGGGTTTTGATCTCCAGTTTATTA
CGGACGTTTTCTATCGACTCTTTCACCACCAACGCAGAGATATAATCGATATACCCGCTCAAAACGGTCTGCGCCTCTTCACTGGTTGGCGCGGTAAAAC
TTAGCGTCCAGGAGGTATACAGTGACGGTTCATCTTTTTTCTTACTGGCATTGTCATCAACCGCTTTCATTTTTTCGCTCAATGCAACAATGGCGCGATG
CAGATCCAGTGGGTCGATTTTCGCTTCTTTTAATTGATCCATCACATAAGGTGATGAACGCAGGTACTCCTCAAGCAAGATAACAGACTGAAATTTCTTG
ATAAACAGGTTAAATGCTTCTGTACGATCAATTTTGATATCCAGATCCAGCACACGAAGCTTAGTGAATGTTTTCTCCAGCTCTTGCCACTAAACAGGTT
CTGGAGGCGTGACAACCGCCGCGCTGGTCCATTTTTGCGGCAGGATGAAAGAGATCAGCAATCCTGCGCAGGCAAACGCAAAAATGACCGCCATGACCGT
TTTTTTGCCCGCCATAAAACTTCGATTAGATTAAGTAAATCAATTTCATTATTACTGGGCGACGCCAGAGGATACTCGGGAAAATGAGTGTCACTTCCCT
GTTTAATATTCAGTGATGACATGGGGTATAACCTGAAAATGAGTCCAATAAGAGTAAATCTCCACGGCCCCCACTCTACCAGTTGGTGAGATTTATCCGA
AGCTGAAGTTTGTAAATTACTCCCACTGAATGCAACATTCACTCTATTTCAGAGAAATACCCACCAAATTTATAAATTAAACAAATGATAAACCCATAAT
TATTTTCTGTAATTATGGGTTTATAGATAATATAAATTTACTTATTTAGCGTCGCACGAATAATCGGCCCAATTTTTTCAAACGCCACCGGAGAGATAAT
ATCCACATGCGCACAATCCTGACGATAGATATCCAGCTCAGCAATCCACGGTGCCCAGGCCTGTTCAGGACTCATACCTTCCTGAAGCGTGCGTTCGGCA
ACAAATAGCGTCGCTTTACCATCAAACGGTACGCTATGAGCTGTCGTCAGCAGGCGCACAGCATCAGCGTAGTTGCCTTCAATGGTGGTAAACAACTCCG
TTGAAGTACTTCCCTGCTGTGCCGCCAGGAAGGCTTCGCGCTCGCGGTTAATCTCCGCCAGCACTTCCGGGTCCAGACCATTGGCTTCTTTTTCCTGCCA
GTTTTGCGTTTCTGGCGGCCAGGTATCCAGCAAGCCAAGAAATGCCACCTGTTCGCCACGGGCACGCAGTCGCGCCGCAATGCCCTGCGCCAGCGTACCG
CCAAGTGAATAACCCAGCAGGTAATATGGGCCGTGCGGTTGTTGTTCAAGTAACGTTGCCAGATGCGCTTCGCAGACTTCATCCAGGTTTGCCGCCGTCT
GCATGGGGCCATGAGGGCGCGGCGACTGAATGCCGATAATCGACCATTGTGGATCGAGATAACGCGAGAGCACGCTGAACTGCCAGGCAAAACCGGATGC
TGGATGGAAACAAAACAGCGTCGGGCCATTACCTTCACGCAACGGCAGAATGGCTTCGAATCCCATGCGCTGGGTGCTGTCTTCTTCACCATCAATAATC
GTTGCCAGTTTGGCGACAGTTGACGCAACCATCACCTGACCCGGCGTCACCTGACGGGCAAACTGCCGACTTAACTGCGCTGCCAGTTTCATTGCCAGTA
GCGAATGACCGCCAAGCGCAAAGAAATCAGCATCGGCATCCTGCACGTCACAACCCAGCAACGACGAGAATGCCGCGGCGATAATCGTTTCACTGCCCGC
TTTCGGCACACGCCCCGGCGTTTGTGCCTTCAGTTCAGGCAACGGTAAGGCTTTGCGATCCAGCTTGCCGTTGGCGCTAAGTGGTAACTGTGGAAGTTGC
AGCAGAACCACCGGTACCATATGTGGTGGCAATGTTTCTCGAAGCTGCGCCTGTAATGCGCTGGTATCCAACGGCAGACCTGATTGCGACACCAGATAGC
CCACCAACTGACGCGCATCACCACCAGTGGCTGCCGCCTGGTTAATCACACCGGCGTGGGTAACGGCTTGTTCGACATCCGGCAGCGCCTGCATCACGCG
ATCAATTTCGCCCAGTTCGATACGCTGCCCGCGAATTTTTAGCTGATCGTCACTGCGCCCGAGGTACTCCACTGCGCCGTTATCCAGCCAGCGGGCCACA
TCGCCGGTACGGTACATCCGTTCACCTGGGGCAAAAGGATCGGCAATAAAGCGGCTGGCGGTCAGATCGGGTCGTCCAAGATACCCCTGCGCCAGTTGAA
TACCGGTGAGATAGAGATCGCCCGCCACACCCGGCGGCACCGGATGCATCATCGCATCGAGAATGCGCAGGCCCGTATTCCACACCGGATAACCAATCGG
CACACTGCTGCCGCGCACCTGTGCCAGTTCCTCGCCAAAAGCCGGATACCAACTGACATCTACCGCCGCTTCCGTCGGGCCATATAGATTATGCAACGGC
GCGCCGGTTAACTGTTGCCATTCGCGGCATAAATCAGCCGGTAGGGCTTCACCACTACAGAAAACCTGTTTCAACGTCGCGCAATTCTGACGAGCGGTTT
GCGGCGTCAGCGATGCAACAAATGCTGCCAGCATCGACGGCACAAAGTGCGTGGTCGTTACACCATATTCGGCAAAGAATTGCTGCATAGCGAGCGGGTC
GCGGTGCGCTTCCGGTTCAGCCATCACCAGTTTAGCCCCGGCAATAAACGGCCAGAAAAACTCCCACACCGAGACATCAAAACTGCACGGCGTTTTTGGG
CAACGACATCTTCGCCTGTAAGCGGGTAGTGGTTTTGCATCCAAAGCAGGCGGTTAACGATAGCCGTCTGCCCGACCATTACCCCTTTCGGCCTGCCGGT
GGAGCCAGAGGTAAAGATGATATAAGCCGTGTGGTGCGGTTGTGAAAGTTTCAGCGGCGCACTGCCCTGCGGTGTAAGCGGGGCGTTATAGCAAAGGCGG
GTTAAATCTGGAACATCGGCAAAGCGCGGCAGTTGATCGTCAGTGGTGATTAACAGCGACGGACGCGCATCTTCCAGCATCATTTTCAGGCGATCGTCCG
GATAGCCGGTATCCAGCGGTAACCAGGCCGCACCAGCCTCAACAATTGCATGTAGCGCGAGAGTCAAAAAGACCGAGCGCGGTAGAGCCACCGCCACGCT
GTCGCCCGGTTTAACGCCGCGCTCACGCAGCAGATTCGCCAGCGCCACCACCTGCTCGCGCATTTCCCGATAGCTGAACTGGTAACGCGCATCTGCCAGC
GCCGGAGCATCCGGTGTTTTTGCCGCTTGTTCTGCCACCAGCGCGCTCAGCGTGGTTTCTGGAATCTCAATCTGAGTGGCGTTGATCTGCGCCAGCTGCG
CATACTCACCTGGCAGCATAATATCGACATCGCCGCACAACAGCGCCGGATCCGCGGCGAACTGGGCAATCAGCATTTTCAGGCGTTCAGCGTGTTGAAT
TAACGTTGGCTCATCGTAACGCTGTTTATTGGCGAGGATTTCAATACTCAAATCTCCGTGTTCATCCGGGAACAGGGCCAGTTCAAGGTCATTAACCGGA
CCGGTTGCCAGGGTATGGGTTTGCGCCTGAACACCAGGAATATCCAGTTGGTAATCAAATACCTTGATATTGAGTACCGGACCGAACAGCGGTTCCTCTC
CTGCCGCTCGCCCACTGTCACGGACAATTTGTTCGGCGTCGTAGCGTTGATGGCGGCGCATTTTTTTCAGTTGTGCTGCCAGTCGGGTTGCCAGTTGCGG
CAGCGTTTCTTGCGCCGCAATGTGAATACCCAACGGTAAAACGTTGAGCACGGGTCCGGTAGCCGTCAGCGCCGCCGAGCCCAGTCGACGCATAAAGATA
AATCCGGCAGCGTAGTCCATGCGGTTGCACAATCGCCCCAGCCACAAGGCTGCCAACGCAAGTGCTAAATCGGTACGCTGCACACCTGAAAGTTGCGTAG
CCAGCTGGCGGAATTCCCCGTCGGTAAATTCCAGTTTCAGGCGCAAAATATCTGCCGAAGCGCTGCGCCCCGGTAAAGGTGCCGGAGAAAGTGACGCGGG
CGGTGGCAGTTGACGACGCTGTTCCGCCCAGAATGCCGCATCACGCTGCCAGGCTTCACTTTCGCGGTACTGCTGATACTCTTCCACTACATCAGCGAAA
GGCGTAAACGGCGAAGCAGGCGTTGGTTCGCCACGCAGCAATGCGCAGTAAATATTGGCGATCTGGCGTGTAATGGCCGGGAAACTGAAGCCATCGACCA
GCAAATGGTGATAACGCTGATACCAGTACCAGCGGTTATCCGCCACCTGTATCAGCTGATGAAAGACCAGTGGTTTACCACTATCGACGCGCAGATCTTG
TTGCAAATCCGCCTGCATTAATGCCCGCGCAGTACCGTGCGGATCAATGTTGGTTCGCAGATCGATAATTTCTGGCAGTTCGAACGTCTGCGCATCATCG
ACCCACTGCCAGACTTCGCCGTTATCTTCCGTAAAACGCATCCGCAACGTATCTGCTTGCGCTAGTCCGGCAACCACCGCGCGGGCCAGTAGTGGCGCAT
CAACTTCTCCGGTTAACTCAACGTAATGCGCCACGCTCCAGGCGGAGGGTAAATCCGACAGTTTTTCTGCCATCCAGATGCCGGGCTGTGCGGCGACCAA
AGGTAAATGCTGGCTCATTGTGCCTCCTGCAACTGGGTGAAATTCGCCGGTGTCAGAGTACGCCAGTGGGCTTCCAGCCACTGCTGGCAGGACGCCTGTG
ACTGCGGCTGACACACAACGTCCCAGCCTGCCGGTAAGGCGCATTGTTGCGGCCACAGACTGAATTGCCCCTGCGCATTGCGCAAAATGTAAAACGCTCC
CTGTGGATCATCGAAGGGATTACTGAATGCCATATTCAACTCCTGTCATGGAAAAGTGGTTGCCAGAGGTCGATTAGCCCCTGCATCAAGCCACCGCGCC
AACAAAGCGCATCATGTCCGCCGTCAACCTGACGCCAGAAAATGGATTCTTTTAGGGGTGTAATTGCGCATACAGCGCCTGATTGGCCTGCATGATCATC
GGCTCGCGAACACCCGCTTCCAGCACAATGCGCAGACCTTCGGCGCTAACTTCACCAGTTTTTAGCTGTTCAAGTAACATACCCTCTTGGTGCCCGCCCC
GATGCGGCCACCAGTACGAACCTGACTGGCTTAATACACAGCCAAAGCGTTCAGGCCAGTGCAGTCCGGCATACAGCGCGGAAAGCCCACCAAAACTCTG
TCCGGCGACCACGGTGCGATCGGCGCGATCGCTAAAAGGGGCAATAGCTTTCACCTGGGGTAATAACTCTTGCTGTACTGCCAGCCAGAAATCCGCATTA
CACGGCAGTTCGTGGGCGCGGTGCGTGGTGTCGATAGCGTCGATCAACACATACACGGCGGGCGGAAGTTGCCGACGATGGGTCAGCGAAGTCAGCGCAG
GCCAGACGGGCATACTCTGCGCCCAAAATTCGCCATCAAGCAAAACTGCCAGCGGGCGTTCTTCTGCTGTTGCATCGCCGGTGGTAAAAATCCATACACG
GCGTGAATTTTTCAACCGTTCACTTTTCCAGATAATTTCTTTGGCAGGCGTTTCTGGCGCTTGCGGACAATCCCATCCCGGTTGCAGAGGCGCTTGCGGC
ATTTCGAGTGCAGAAACAGCGTGCCCTCGCCCGCCTTTCCAGCTTTGTGGATTCAGCGGATCGGCTATCGCCTGGGGTAATAGTTTTCGCCAGCCTTCGC
GTAATTCGAGGCGATCAGGGGATGGTGCAGAAAAAATGTCATCGCGTTCGGTGGGAATAAAGCAGTAGCTGCCGCGCCAGTTGGCATTGAGTTGTGTCGT
CCACTGCCAAACATCGGTTCCTGCAATTCGCTGCATCGACCGGGGCTGGCTGTTCTGATGGTGATCGGTCACGCCAGTGATATAGACCCATACGCGCTTT
ATCGTCGAGTATTCTTCAGAACCCTGGGGATCACGCCACCAGAAAGTGACCTCAAACATTTCGTCATTCAGACGTTGCCATTCCGGGCCATGTTTCGACT
GCCACCAGCTCTCACTTCCTACTTTTAACGCCGTCACACCATAACCCCATGTTTACTGTGCAATTTTTTATTGATTGCAGAAATATATTGATAATATTAT
TGATAACTATTTGTATTTGCAATAGCGTAATGGCGCGTCGTGGGAAGCGCGGACATTAATTAATCAGCTGCACTGCGTGTCTTTCAGGATCAAAGGTTTT
CGCGGTAGCGGGATGCGTCGTGTTGATGACGACCATGCCCGACAGTTGCAATTCGTGGCAAAAATGCAGGAATAAAACAATGAACAAGAAGATTCATTCC
CTGGCCTTGTTGGTCAATCTGGGGATTTATGGGGTAGCACAGGCACAAGAGCCGACCGATACTCCTGTTTCACATGACGATACTATTGTTGTTACCGCCG
CCGAGCAGAACTTGCAGGCGCCCGGCGTTTCGACCATTACCGCAGATGAAATCCGCAAAAACCCGGTTGCCCGCGATGTATCGGAGATCATTCGTACCAT
GCCTGGCGTTAACCTGACCGGTAACTCCACCAGTGGTCAGCGTGGTAATAACCGCCAGATTGATATTCGCGGCATGGGTCCGGAAAACACGCTGATTTTG
ATTGACGGCAAGCCGGTAAGCAGCCGTAACTCTGTGCGTCAGGGCTGGCGTGGCGAGCGCGATACCCGTGGTGATACCTCCTGGGTGCCGCCTGAAATGA
TTGAACGTATTGAAGTTCTACGTGGTCCGGCAGCTGCGCGTTATGGCAACGGCGCGGCGGGCGGCGTGGTTAACATCATTACCAAAAAAGGCAGCGGTGA
GTGGCACGGCTCCTGGGATGCTTATTTCAATGCGCCAGAACATAAAGAGGAAGGTGCCACCAAACGCACCAACTTCAGCCTGACCGGTCCGCTGGGCGAC
GAATTCAGCTTCCGCTTGTATGGCAACCTCGACAAAACCCAGGCTGACGCGTGGGATATCAACCAGGGCCATCAGTCCGCGCGTGCCGGAACGTATGCCA
CGACGTTACCAGCCGGGCGCGAAGGGGTGATCAACAAAGATATTAATGGCGTGGTGCGCTGGGACTTCGCGCCTCTGCAGTCACTCGAACTGGAAGCGGG
CTACAGCCGCCAGGGTAACCTGTATGCGGGTGATACGCAGAACACCAACTCTGACGCTTACACTCGCTCGAAATATGGCGATGAAACCAACCGCCTGTAT
CGCCAGAACTACTCGCTGACCTGGAACGGTGGCTGGGATAACGGCGTGACCACCAGCAACTGGGTGCAGTACGAACACACCCGTAACTCGCGTATTCCGG
AAGGTCTGGCGGGCGGTACTGAAGGGAAATTTAACGAAAAAGCGGCACAGGATTTCGTCGATATCGATCTTGATGACGTGATGCTGCACAGCGAAGTTAA
CCTGCCGATTGATTTCCTCGTAAACCAAACGCTGACGCTGGGTACAGAGTGGAATCAGCAACGGATGAAGGACTTGAGTTCCAACACCCAGGCGCTGACC
GGAACGAATACCGGCGGTGCTATTGATGGTGTGAGTGCCACCGACCGTAGCCCGTATTCAAAAGCAGAAATTTTCTCGCTGTTTGCCGAAAACAATATGG
AGCTGACTGACAGCACCATCGTAACGCCGGGGCTGCGTTTCGATCATCACAGTATTGTCGGCAATAACTGGAGCCCGGCGCTGAACATATCGCAAGGTTT
AGGCGATGACTTCACGCTCAAAATGGGCATTGCCCGCGCTTATAAAGCGCCGAGTCTGTACCAGACTAACCCAAACTACATTCTCTACAGTAAAGGTCAG
GGCTGCTATGCCAGCGCGGGCGGCTGCTATCTGCAAGGTAATGATGACCTGAAAGCAGAAACCAGCATCAACAAGGAGATTGGTCTGGAGTTCAAACGCG
ACGGCTGGCTGGCGGGCGTGACCTGGTTCCGTAACGATTATCGCAATAAGATTGAAGCGGGCTATGTGGCTGTAGGGCAAAACGCAGTCGGCACCGATCT
CTATCAGTGGGATAACGTGCCGAAAGCGGTGGTTGAAGGTCTGGAAGGATCGTTAAACGTACCGGTTAGCGAAACGGTGATGTGGACCAATAACATCACT
TATATGCTGAAGAGTGAAAACAAAACCACGGGCGACCGTTTGTCGATCATCCCGGAGTATACGTTGAACTCAACGCTGAGCTGGCAGGCACGGGAAGATT
TGTCGATGCAAACGACCTTCACCTGGTACGGCAAACAGCAGCCGAAGAAGTACAACTATAAAGGTCAGCCAGCGGTTGGACCGGAAACCAAAGAAATCAG
TCCGTACAGCATTGTTGGCCTGAGCGCGACCTGGGATGTGACCAAGAATGTCAGTCTGACCGGCGGCGTGGACAACCTGTTCGACAAACGTTTGTGGCGT
GCGGGTAATGCCCAGACCACGGGCGATCTGGCAGGAGCCAACTATATCGCAGGTGCCGGGGCGTATACCTATAACGAGCCGGGACGTACGTGGTATATGA
GCATTAATACTCACTTCTGAAGCTAACGTCAGATTGTTGACAAAGTGCGCGTAGTTCATGCCGGATGCGGCGTGAACGCCTTATCCGGCCTACAAAAATC
TTGCCAATTCAATATATTGCAGGACCACGTAGGCCTGATAAGCGTAGCGCATCAGGCAGTTTTGCGTTTGTCATCATTCTCTAATATGGTTGACATGAAA
ACTACGCATACCTCCCTCCCCTTTGCAGGACATACGCTGCATTTTGTTGAGTTTGATCCGGCGAGTTTTCGCGAGCAGGATTTACTCTGGCTGCCGCACT
ACGCACAACTTCAACACGCTGGACGTAAACGTAAAACAGAGCATTTAGCCGGGCGGATCGCTGCAATTTATGCGCTGCGGGAATATGGCTATAAATGTGT
GCCTGCAATCGGCGAGCTACGCCAACCTGTGTGGCCTGCGGGTGTATACGGCAGCATTAGTCACTGTGGGACTACGGCATTAGCCGTGGTTTCCCGTCAA
CCGATTGGCATTGATATTGAAGAGATTTTCTCTGCACAAACCGCAAGAGAATTGACAGACAACATTATTACACCAGCAGAACACGAGCGACTCGCAGAAT
GCGGTTTAACCTTTTCTCTGGCGCTGACACTGGCATTTTCCGCCAAAGAGGGCGCATTTAAGGCATGTGAAAGACAAACTGATGCAGATTTTCTGGACTA
TCAGATAATTAGCCGGAATAAACAACAGGTCATAATTCATCGTGAGAATGAGATGTTTGCTGTGCACTGGCAGATAAAAGAAAAAATAGTCATAACGCTG
TGCCAACACGATTAATTGACAACATCTGGTACGATTCGCCCGCAGCCATCTCTGACTGCGGGCGAAAGTGTAAAGCAGGTGCCTTACCATCCTGACCTGA
CAACCGGATATGCGGGGATTACTCCCCGCACAACGGCTACTTCTTCGGTTCGTAAGCGAGAACAGCCTTAAACTCAATATTACGTTCCTTCACCGTAAAC
TCACACAGCGAGTCTCCGACCAGAAGCGTAAATCCCAGCACCGTCAAACACAGCACTATGACTGCCGCAAGGGCATATTTCGTCAGCATGTTTATATTGC
CTCCATGCGAAGAAGGGACTACCATCCAAATTGTTTGGGTTTGGAGTGGCAGCCCCAGGATTGATAGAAATATCTCCTGGGGCTTCATCTTTCCAGACCT
CAGAGTAAACCTGAAACCGGAAAGCTTCAGGCACCCGCCGTTATCTTACCCTTGCTTAGCAAAATGGCTGTTTATTTATACAGTAAGTCCTGTTTCGGAC
TTCTCACTCCCCATTTGATCAACTGAAGCTGAACCCGTTTTTTTCTGCATGCCTCAATCGTCAAAATTCTTCGCCACCAGCCAGCTCTGCCATAACTTGT
CACATTGCAAAAGTAGCCAAACTTCTTCAGTCACCATCAGTTCACCATCACCAAAAAAAGAAACATTCCAGAACTTTCGCATCTCACCCAGCCGCTCCCA
CTTCTATACTGAATAGAAAACGCCAACATAAGAGAAACCTATGCCATTACCCGATTTTCATGTTTCTGAACCTTTTACCCTCGGTATTGAACTGGAAATG
CAGGTGGTTAATCCGCCGGGCTATGACTTAAGCCAGGACTCATCAATGCTGATTGACGCAGTTAAAAATAAGATCACGGCCGGAGAGGTAAAGCACGATA
TCACCGAAAGTATGCTGGAGCTGGCGACGGATGTTTGCCGTGATATCAACCAGGCTGCCGGGCAATTTTCAGCGATGCAGAAAGTCGTATTGCAGGCAGC
CGCAGACCATCATCTGGAAATTTGCGGCGGTGGCACGCACCCGTTTCAGAAATGGCAGCGTCAGGAGGTATGCGATAACGAACGCTATCAACGAACGCTG
GAAAACTTTGGCTATCTCATCCAGCAGGCGACCGTTTTTGGTCAGCATGTCCATGTTGGCTGTGCCAGTGGCGATGACGCCATTTATTTGCTGCACGGCT
TGTCACGGTTTGTGCCGCACTTTATCGCCCTTTCCGCCGCGTCGCCATATATGCAGGGAACGGATACGCGTTTTGCCTCCTCACGACCGAATATTTTTTC
CGCCTTTCCTGATAATGGCCCGATGCCGTGGGTCAGTAACTGGCAACAATTTGAAGCCCTGTTTCGCTGTCTGAGTTACACCACGATGATCGACAGCATT
AAAGATCTGCACTGGGATATTCGCCCCAGTCCTCATTTTGGCACGGTGGAAGTTCGGGTGATGGATACCCCGTTAACCCTTAGCCACGCGGTAAATATGG
CGGGATTAATTCAGGCCACCGCCCACTGGTTACTGACGGAACGCTCGTTTAAACATCAGGAGAAAGATTACCTGCTGTATAAATTCAACCGTTTCCAGGC
CTGTCGCTATGGGCTGGAAGGCGTCATTACCGATCCGCATACTGGCGATCGTCGGTCACTAACGGAAGCCACCTTGCGTTTACTGGAAAAAATCGCCCCT
TCTGCACATAAAATTGGCGCATCGAGCGCAATTGAAGCACTGCACCGTCAGGTCGTCAGTGGTCTGAATGAAGCGCAGCTAATGCGTGATTTCGTCGCCA
ATGGTGGCTCGCTAATTGGGCTGGTGAAAAAGCATTGTGAGATCTGGGCCGGAGAATAAGTCGGGAATTGCCTTACAGAAGAATATCCCTGACAATGGTG
TTTTAACTTACATTTAACAATGTTATGAAACACCCTTTAGAAACCTTGACCACCGCAGCAGGCATTTTGCTGATGGCTTTCCTCTCTTGCCTGCTGCTGC
CCGCCCCCGCACTGGGGCTAACGCTGGCACAAAAACTGGTGACCACGTTCCATCTGATGGATCTTAGCCAGCTTTACACTTTATTGTTTTGTCTGTGGTT
TTTAGTGCTGGGCGCTATTGAGTATTTTGTTCTACGCTTTATCTGGCGACGCTGGTTCTCGCTGGCGGATTAAACGTCGATTATCGCCGAACTTCGCGGC
ATACTTTGCTTATTCTCCTTCGCCTAAAGGAACATTTATGGATAAGCAATCACTGCACGAAACGGCGAAACGCCTGGCTCTTGAGTTACCCTTTGTCGAG
CTTTGCTGGCCTTTTGGCCCGGAGTTCGATGTTTTTAAAATTGGCGGCAAGATTTTTATGCTGTCGTCGGAGCTACGCGGCGTCCCCTTTATCAATCTGA
AGTCCGATCCACAAAAATCCCTGCTAAATCAGCAAATATACCCAAGCATCAAGCCTGGGTATCACATGAATAAAAAGCACTGGATTTCGGTGTATCCCGG
CGAGGAAATCTCCGAAGCGTTACTTCGCGATCTGATCAACGATTCGTGGAATCTGGTGGTTGATGGTCTGGCTAAACGCGATCAAAAAAGAGTGCGTCCT
GACTCAACCGTAAATCAATAGCGCATTTTTCTCGCTTACCATTTCATCTCGATCCTTGTAATCTGCTGGCACGCAAAATTACTTTCACATGGAGTCTTTA
TGGATATCATTTCTGTCGCCTTAAAGCGTCATTCCACTAAGGCATTTGATGCCAGCAAAAAACTTACCCCGGAACAGGCCGAGCAGATCAAAACTCTACT
GCAATACAGCCCATCCAGCACCAACTCCCAGCCGTGGCATTTTATTGTTGCCAGCACGGAAGAAGGTAAAGCGCGTGTTGCCAAATCCGCTGCCGATAAT
TACGTGTTCAACGAGCGTAAAATGCTTGATGCCTCGCACGTCGTGGTGTTCTGTGCAAAAACCGCGATGGACGATGCCTGGCTGAAGCTGGTTGTTGACC
AGGAAGATGCCGATGGCCGCTTTGCCACGCCGGAAGCGAAAGCCGCGAACGATAAAGGTCGCAAGTTCTTCGCCGATATGCACCGTAAAGATCTGCATGA
TGATGCAGAGTGGATGGCAAAACAGGTTTATCTCAACGTCGGTAACTTCCTGCTGGGCGTGGCGGCGCTGGGTCTGGACGCGGTGCCCATCGAAGGTTTT
GACGCCGCCATCCTCGATGAAGAATTTGGTCTGAAAGAGAAAGGCTACACCAGTCTGGTGGTTGTTCCGGTGGGTCATCACAGCGTTGAAGATTTTAACG
CTACGCTGCCGAAATCTCGTCTGCCGCAGAACATCACCTTAACCGAAGTGTAATTCTCTCTTGCCGGGCATCTGCCCGGCTATTTCCCTCAGATTCTCCT
GATTTGCATAACCCTGTTTCAGCCGTCATCATAGGCTGCTGTTGTATAAAGGAGACGTTATGCAGGATTTAATATCCCAGGTTGAAGATTTAGCGGGTAT
TGAGATTGATCACACCACCTCGATGGTGATGATTTTCGGTATTATTTTTCTGACCGCCGTCGTGGTGCATATTATTTTGCATTGGGTGGTACTGCGGACC
TTCGAAAAACGTGCCATTGCCAGTTCACGGCTTTGGTTGCAAATCATTACCCAGAATAAACTCTTCCACCGTTTAGCTTTTACCCTGCAGGGGATTATCG
TCAATATTCAGGCGGTATTCTGGCTGCAAAAGGCACCGAAGCGGCAGATATTCTGACTACCTGTGCGCAGTTGTGGATCATGATGTATGCGCTGCTTTCA
GTCTTCTCGTTGCTGGATGTTATTTTGAATCTGGCGCAGAAATTCCCGGCGGCATCTCAGTTACCGCTGAAAGGGATATTTCAGGGGATTAAACTGATCG
GCGCGATTCTGGTCGGCATTTTGATGATCTCGCTGCTGATTGGTCAGTCGCCAGCGATTCTGATCAGCGGTCTTGGTGCAATGGCTGCCGTGCTGATGTT
GGTATTTAAAGATCCGATTCTTGGTCTGGTGGCAGGTATTCAGCTTTCCGCGAACGATATGCTGAAACTGGGCGACTGGCTGGAGATGCCGAAATACGGC
GCGGATGGCGCGGTGATCGATATTGGGTTAACCACCGTCAAAGTACGTAACTGGGACAATACCATTACCACTATTCCCACCTGGTCTCTGGTTTCTGACT
CCTTTAAAAACTGGAGCGGGATGTCAGCATCTGGCGGGCGACGTATTAAGCGCAGTATCAGTATTGATGTCACCAGTATTCGTTTTCTTGATGAAGACGA
AATGCAACGTCTGAATAAAGCGCATTTGTTAAAGCCTTATTTAACCAGCCGCCATCAGGAAATTAATGAGTGGAATCGCCAGCAAGGTTCTACGGAGTCG
GTATTAAACCTGCGCCGAATGACCAATATTGGAACCTTTCGTGCCTATCTGAACGAATATCTGCGGAATCATCCGCGGATTCGCAAAGATATGACCTTAA
TGGTACGCCAACTGGCTCCTGGTGATAACGGTTTACCGCTTGAGATCTATGCGTTTACCAACACCGTGGTGTGGCTGGAATATGAAAGCATTCAGGCTGA
TATATTCGATCACATATTTGCGATTGTCGAAGAGTTTGGTCTGCGACTTCATCAGTCGCCAACCGGCAATGATATTCGCTCTCTGGCGGGTGCATTTAAG
CAGTAATTAAAAAAACCGCTCTCATCGAATGGATGAGAGCGGCTTTCAGATTGTTGACATCATTTTGTCGGATGCGGCGTGAACGCCTTATCCGACCTAC
AGAATCGTTACAAATTGTAGGCCCGATAAGCTTGCGCATCGGGCAAATCAGCCTCACATCAGCTTAATTCACTTTCCTACGCAATGTTTTAAACGCCACA
AACAGGAACACAATCCACACCGGCAGCAGAATCGCTGACAGGCGCATATCATCCATCGTGCACATCAGCAGCAAAATCATGCCGAGGAAGGCGATGCAAA
GATAGTTGCCGAACGGATAGAGCAGCGCCTTAAATTGTGTTTCACGCCCCTGACGTCGCATCGCCGCGCGAAAACGCAGATGCGCCAGGCAGATCATAAT
CCAGTTCAACAGCAGCGTTGCTACCACCAGCGCCATCAGCAGACCAAACGCTTTTTGCGGCAGCAGATAGTTGATTAACACCACCAGCGAAGTGATCGCT
CCGGAAAGCATCAGCGAGTTAATCGGCACGCCGCGACGGCTGACGCGAGTCAAAAACTTTGGCGCATTACCCTGCACAGAAAGGCCAAACAGCATGCGGC
TGTTAGAGTAAACCCCGCTGTTATACACCGACAGCGATGCCACCAGAATGACGAAGTTCAGCGCAGAAGCCACCACATTGCTGTCGAGATTATGGAAAAT
CATCACAAACGGGCTACTGTTGGATTTCACTTCCACCCACGGGTAGAGCGCCAGTAAAACCACCAGTGAACCGATATAAAACAGCAGGATGCGATACACC
ACCTGATTCACTGCTTTAGGGATGCTTTTTCCGGATCGCGCGCTTCAGCCGCAGTAATCCCAATCAGCTCCAGACCGCCGAAGGAGAACATAATTACCGC
CAGCGACAAAATCAGTCCATTCCAGCCGGTGGCAAAGAAACCGCCGTAGCGCCAGAGGTTATCGATACTGGCTTTCTCACCGCCGTGCCCAGAAAACAGC
AGCCACAGGCCAAAGCCGATCATACCGATGATCGCCAGCACTTTAATCAGCGCAAACCAGAACTCGGTTTCGCCATATAAGCGCACGTTCACCAGGTTAA
CGGCGTTGATGATAATAAAGAAGGCGGCAGCCCAAATCCACGTTGGAACATCCGGGAACCAGTACTGCATATAGATGCCCGCAGCGGTCAGCTCTGCCAT
TCCCACCAGCACGAACATTACCCAGTAGTTCCAGCCAGAGAGGAAGCCCGCAAACGGTCCCCAGTATTTATAGGCAAAGTGGGCAAATGAACCGGATACC
GGCTCTTCGACCACCATTTCGCCGAGCTGGCGCATAATCAGGAAAGCGATGATCCCGGCGACGCCGTAGCCCAGCAATACAGCCGGACCCGCCATCTGAA
TCGCCGGGCCAATGCCAAGAAACAGACCAGTACCAATTGCGCCACCCAGCGCAATCAGTTGAATATGACGGTTATGTAATCCGCGATGAAGCGTCGGCTC
TTGATTCGACGCAGTATCTTCCGATACGGTTGACGCGTTTTTCACGCCTTTCCCCTGTGTGTCTTTTTTGTTGAGGGGCACCTTTTAACATTTAGTGCCC
ATCGTCGCAAGACACAATCCACACGGTTAAACCGGGTATCCTGCTTTTATTTCCGTACCCGATGTCGGTGCAGCCACATCAGCTTATACGCCGCCGGGAT
AATAAACAGCGATAGCAAAGGCGCGGTGATCATGCCGCCAATCATCGGCGCGGCAATCCGGCTCATCACCTCTGAACCTGCTCCCGTTCCCCACAGAATC
GGCAGCAGACCAGCGATAATCACCGCCACCGTCATCGCTTTCGGGCGCACGCGCAGGACCGCGCCGTGATACAACGCCTCATCCAGCTTCTGCTCGCTGA
ATGTTTGCGGATTATTCAACGACGGCTCGGCCTCTATGGCGTGACGTAAATACATCAGCATCACCACGCCAAATTCGGCGGCGACTCCTGCGAGGGCAAT
AAAACCGGTGCCCGTCGCCACGGAAAGATGAAAGCCCATCCACCACAGCAACCAGATGCCACCCACCAGCGCAAACGGTACGCTGCTGATAATCAGCAAC
GCTTCGCCCACCCGACGGAACGCCAAATACAACAGCACGAAGATGATCATCAACGTCATCGGCACCATCAGTTTCAGCTTATGGTTGGCGCGCTCCAGTA
GCTCGAACTGCCCGGAGAATGCCACGCTGGTGCCCGGTTTTAACTGCACTTTTTCAGCTATCGCTTTTTGCAGATCGTGAACCACCGACACCATGTCACG
ATCGCGGGCATCGATATAAATCCAGCTCGTCGGGCGCGCATTCTCGGTTTTCAGCATCGACGGTCCGGTAAAGACTTTAACGTCGGCCACGTCCGCCAGA
GTGATTTGCTGCTTCATCGGCGTGAGGATCGGCAACTGGCGCAGTGCCTGCGGGCTATCGCGCCAGCTTTGCGGATAACGCAGATTAATTGGATAACGAG
CAATCCCTTCCACCGTTTCGCCAACCATCGCCCCGCCCACCGCAGAAGTCACAAACAACTGCACATCCGCCACCGTCATACCGTAACGCGCGGCTTTTTC
ACGGTTAATCTCAACGTTGATATAGCGCCCACCTTCCAGACGCTCAGCAAGCGCAGAAGCCACGCCTGGCACCGTTCGCGCCACTTCTTCAATTTGCTCC
GCCATCGTGTCGATATCCGCCAGCACAGTGCCGGAAACTTTAATGCCGATAGGGCTTTTAATGCCAGTCGAGAGCATATCGATACGGTTACGAATTGGCG
GCACCCACAGATTCGCCAGCCCCGGCAGACGCACGGTGTTATCCAGTTCCTCAATGATTTTGTCCATCGTCATGCCAGGCCGCCACTGATCCTGCGGCTT
AAGCTGGATAGTCGTTTCTACCATCTCCAGTGGAGCTGAATCGGTGGCGGTTTCCGCTTTCCCGGTTTTGCCAAATACCCGCGCCACTTCCGGTACGCTC
ATAATCAGCTTGTCGGTTTTTTGCAGCATGCTCGCCGCCTCTGCTGCGGAAATCCCCGGCAGCGTCGATGGCATATACAACAAGTCGCCTTCATTGATCT
GCGGTAAAAATTCCCCGCCAACTTTATTGAGCGGCCAGAGAACCGTCAGCACCGAAAGCGCTGCCACCAACAGCGTGGTTTTCGGCCAGTGCAGTACTTT
CAGCAACAGCGGATGATAAACACGAATCAAAAAGCGATTGAGCGGGTTACTGCTTTCTGGCGGAATTTTGCCACGGATCCAGTAGCCCATCAGGATCGGG
ATCACTACGATCGCCAGCAGCGCCGCGCCCGCCATCGCATAGGTTTTGGTGAACGCCAGCGGGCCAAACAGACGCCCCTCCTGCCCTTCCAGGGTGAAAA
TCGGGATAAACGACAGCGTGATAATCAGCAGACTGATAAACAGCGCCGGCCCCACTTCAACAGATGCATCGGTGATCACCTGCCAGCGCGTTTTATTATC
CAGCGTGGCGTCAGGATGCTGGTGCTGCCACTCTTCCAGCCGTTTATGCGCATTCTCGATCATGACGATAGCGGCATCGACCATCGCCCCGACGGCAATC
GCAATGCCACCCAACGACATAATATTGGCGTTCAGTCCCTGAAAGTGCATGACAATAAAAGCAATACACAACCCCAGCGGCAACGAAATAATCGCCACCA
GCGCCGAGCGCACATGCCAGAGAAACAGCGCACAGACTACCGCCACCACAATAAACTCTTCCAGCAACTTGCCGCTGAGGTTGTCAATGGCGCGGTCAAT
GAGCTGACTGCGATCGTATGTTGTAACTATCTCCACGCCTTCCGGCAGACTGCTTTTCAGCGTTTCCAGTTTGTCCTTCACGGCGGCGATCACTTCACGG
GCGTTTTTGCCGGAACGCAGGATCACCACCCCGCCCGCCACTTCGCCTTCGCCGTTCAGTTCGGCAATGCCCCGGCGCATCTCCGGGCCAACCTGGACCT
TCGCAACATCACGCAGATAAACGGGCACGCCATTTTCACTGGCTTTTAAAACGATGTGATTAAAGTCGTCGAGCGTTTGCAGATAGCCGCTGGCGCGCAC
CATATATTCCGCTTCCGCCAGTTCGATCGACGAACCGCCCGCTTCCTGGTTTGAAGCATCCAGCGCGCTTTTTACTTCGGCGAGACTGATGCCATACTGC
GCCAGGCGCTGAGGATCGATAACCACCTGATACTCTTTCACCACACCGCCCACCGACGCCACTTCCGCAACGTCAGGGATGGTTTTTAGCTCATATTTGA
GAAACCAGTCCTGCAATGAGCGTAAATCGGCCAGATCGTGCTTACCGCTGCGATCCACCAGTGCATATTCATAGATCCAGCCAACACCCGTGGCATCTGG
CCCCAGCTCGGCGCTGACTCCCGCAGGCAGCTTACCCTGTACCTGGTTGAGGTACTCCAGCACCCGCGAGCGCGCCCAGTACGGATCGGTGCCATCTTCG
AAAATGACATACACATAAGAGTCGCCAAACTGCGAGAAACCGCGCACAGTCTTCGCGCCAGGCACCGACAACATGGTGGTGGTTAGCGGATAAGTCACCT
GATTTTCAACGATTTGCGGTGCCTGACCGGGATAGCTGGTTTTAATAATCACCTGTACATCAGAGAGATCCGGCAGTGCATCCACTGGCGTGTTAATGAT
GGTCCAGGTGCCCCAGATACTCAGAAACAACGCGCCCATCAGCACCAGAAAACGGTTCGCCACCGAGCGACGAATAATCCATTCAATCATTGGCTATTCC
CTCAATGCGCATGGGTAGCACTTTCAGAGCGCATCCGCTCCAGTGCGCCAGAAATATTGGCTTCAGAATCAATCAGGAACAGGCCGCTGGAAACCACCTT
TTCACCTTCCGCCAGACCAGAGCGTAACGCGGTGACGCCTTGCGATGCCTGGAAAACGGCAACACGTTTCGGTACAAAGCGCCCGTCAGCATCAACGGTA
ATCACCCGCTGTTCGTTGCCGGTATCAATCAGCGCCTGTGACGGAATGAGCAGCATCGGTTCGCTGGCGGTATTGAGTTGCAACCAGGCGTTCATGCCCG
GTTTTAGCGCCTCGTCGGCGTTGTCGACTTCCAGACGCAGTTGCAGCGTGCGGGTCGCAGCATCCACGCCAGGTAGCAGCGTCCATTTGCGGATGGTGAG
TGTTTTATCAGGTCGCGCCGGAACGGTGAGCGTAAACTGCGAGGCATCTTTCACCAGCCAAGCGATGGACTCCGGGATCGCAGCAGTGACCCACACTGGG
TCCATACCCTGAATTTTCGCGACCACGTTATCTTTGGCGATATTCATTCCCGCGCGCAGATCAAACGCGGTGATCACGCCATCAATGGGCGCTTTGAGCG
TAAAGCGAGTCTGGATTTTTTGCGTGGCGATCAGGCGGCGAATATCAGCCTCCGGCATTCCCGCCAGTCGCAGTCGCTCAAGAATGCCTTCAGTCTGGGT
CGCCGTACCGCCGGTTTCGCGCAGCAGTAAATACTCACTCTGCGCTTCCACCCAGTCGGGAATGGTCAGGTCGAGAAGCGGCGCGCCCTTTTGCACTTTA
TCGCCCACGGTAAGCGGATACACCTTGTCGATAAACCCGGCGGCGCGGGCCTGCACAATGGCATACTGATACTCGTTGTAACTGACATTCGCCGGGAAAC
TCTGGGAAAAAGTCAGCGGCCCGCGCGTGACGGTCGCCGTTTTCACACCCAGATTCTGCGTCTGAGTCGGGTCAATGCGCACACCAGACGCAGAACTCTC
TTCATCGGCATATTTCGGCACCAGATCCATATCCATAAACGGCGATTTCCCTGGTTTATCGAACCGCGTATTGGGATACATCGGGTCGTACCAGAATAAG
ACTTTACGTTCTGCGGTCGACGTTTTTTCTGCGGGCGGTTCCTCCTTTGCAAACCAGGTAAAACCTGCCGCAGAAATAATACCGCCCGCGATCATGCTGC
CGATAATAAGCGCGATTTTTTTCATCTCATTAAACCCGGATTACTGGCTGACTTTAATATCCTGTAATAAAGAAAGGTTGCCCTGTTGGACAAAATTAAA
CGCTACTTTATCGCCGGTTTTAATTTCGCTCATTTTCGTCTGCGGGGTGATGGTAAAGCGCATAGTCATCTCCGGCCAGTTCACGGCAGCAATCGGATCG
TGATGGATGGTGATTTTTTTGCTTTCCAGATCAACACCTTTTACCACGCCAGTGGCGCTAATAACCTGTGGTTGTGCTTCGCTCATGGTTTCATGATGAT
GTTCGTTAGCCTGGGCATTAAAGCCAATAACGGTAAACAGACTAAACATTGCGACTTGCAGTGCTTTTTTCATTTATTCTCTCCTGGAGTTAAAAATTAT
TGCTGCCAACCGCCCCCTAAGGCGGTATATAAAGAAATTTCGTTAACCTGACGGGCATAATTCAGGTCAAGTAAAGTTTGTCGGGTTGCAAATAAAGAAC
GCTCGGCATCCAGCACTTCCAGATAACTTACCGCGCCGTGCTGATATAATGCCCGCGCCCGTTGCAAAGTAATTTGCAGCGACGCAAGATAACGCTGCTG
GGCGCTGATTTGATCGTTCAGGCTTTGACGTAATGCCAGCGCATCTGCCACTTCTTTAAAGGCGTTCTGGATTTTCTGTTCATAATTCACCACCGACTGC
TGCTGGCGAATTTCGGCGATATCCAGATTGGCCTGGTTGCGTCCAGCATTAAAAATGGGGATCTCAATTTTAGGAATAAAATTCCACATCCCGCTGCTGG
CATTAAATAATGACGACAGATCGCTGCTGGCGGTTGATATTCCGCTGGTCAGGCTGATAGACGGGAAAAATGCCGCACGCGCAGCACCAATATTGGCATT
AGCCGCCATTAACGCGTGTTCAGCTTCCATAATATCAGGGCGCTGCAATAAGATTTGCGACGGCAAGCCCGCCGGTAATTTAACGCTTTGCAGGCTGTCG
CTGTTTACTGTCTGCGCTTGCGGCAGCTTGCCGTAGCTTCCCAATAACAGTTGCAATGCATTATTTGCCTGCGCCAGTTCCCCCTGACGTTTAGCGATGT
CGCTGCGGGTACTTTCTATCACCCCGCGAGCCTGTTCCAGCGCCAGAACATTGCTGCTACCGGTCAACAGTTGTTTTTCGACAAACGCATATGACTGCTG
ATAATTACGCAGCGTTTCTTCGGCTATTTGCAATTGCGCATACGCCAGTTGCTGATTGAAATAGCTTTGCGCGACATTAGAAACCAGCAAAATATGCACC
GCGCGCTGAGCTTCCTCAGTGGCTAAATAATTTTGGCGCTCGGCTTCGCTCATGTTCTTTAAGCGCCCGAAAAAATCGAGATCAAAGCTGGCGTTAAGGC
CAGTCGAGAACTCCCGCGTCGTGGCTGAATCGCCTTTAAGATTGCCGCTCCAGCTGCCGCTGCCCTCGCCATTGAGCTGTGGGTAGCGGTCGGCATCGGT
CAGACGATATTGCGCCCGCGCTTCCTGCACTTTCAGCGCCGCCATGCGCAAATCCCGGTTATTCACCAACGCCTCGCTAATCAGCGTCTTCACCTGATTA
TCAACAAAAAAGGTGCGCCAGCCCGCGTTCTGGTAGTTATCTGCTGCGTTAACCAGGCCGTTCTGGCTGAGTGAGAACTGCTGCGGCACGGGCATTGCCG
GACGCTGATAATCCGGTGCCAGTGAACAACCGGTTAGCGCAAGGGCCACACAAAATGGCAGAAGTTTACAAGGAGACATAGGCTCATAATTTCTGGTGAT
TTTATGCTGCCAACTTTACTCGCCAGGCTCTGATTTTCCGGTGACAGGAAAATGACAAAATTGTCATTTTGCCAATAAGCGATTGCCATCTGATCCCGCT
ACTCTAGAATTGCCCGGGCAACATGCGGAGGAAATATGAAACTGTTGATTGTCGAAGATGAAAAGAAAACCGGAGAATACTTGACCAAAGGGTTAACCGA
AGCCGGTTTTGTGGTCGATTTGGCCGACAACGGGCTGAATGGCTACCATCTGGCGATGACCGGTGATTATGATCTGATAATCCTCGATATTATGCTGCCG
GACGTGAACGGCTGGGATATCGTGCGCATGTTGCGTTCCGCCAATAAGGGGATGCCGATTCTGTTGCTTACCGCGCTTGGCACCATTGAACATCGCGTCA
AGGGGCTGGAGTTGGGGGCGGATGACTATCTGGTGAAGCCGTTCGCTTTTGCTGAACTGCTGGCGCGGGTGCGCACTCTACTGCGGCGCGGGGCGGCGGT
GATTATCGAAAGTCAGTTTCAGGTTGCCGATCTGATGGTCGATCTCGTCAGCCGCAAAGTCACCCGCAGCGGCACGCGCATCACTCTGACCAGTAAAGAA
TTTACTCTGCTGGAGTTTTTCCTCCGCCATCAGGGCGAAGTGCTGCCCCGCTCGCTTATCGCCTCGCAGGTATGGGACATGAATTTTGACAGCGATACCA
ACGCCATTGATGTGGCGGTGAAGCGGCTGCGCGGCAAAATCGACAACGACTTTGAGCCAAAGTTGATTCAGACCGTGCGCGGCGTGGGTTACATGCTAGA
GGTGCCGGATGGTCAGTAAGCCATTTCAGCGCCCGTTTTCGCTGGCAACACGCCTGACCTTTTTTATCAGCCTGGCCACCATCGCGGCGTTTTTCGCCTT
TGCATGGATCATGATCCACTCAGTAAAAGTGCATTTTGCCGAGCAGGATATTAATGATTTAAAAGAGATTAGCGCCACCCTTGAACGGGTACTTAATCAC
CCTGACGAAACGCAAGCCCGACGCTTAATGACGCTGGAAGATATCGTCAGTGGTTATTCCAACGTGTTGATTTCCCTGGCAGATAGCCACGGCAAAACGG
TGTATCACTCCCCCGGTGCGCCTGATATCCGCGAGTTTGCACGTGATGCCATACCCGATAAAGACACGCGGGGCGGCGAGGTGTATCTCCTTTCCGGCCC
GACGATTATGATGCCGGGCCACGGTCACGGGCATATGGAACACAGCAACTGGCGGATGATTAGCTTGCCGGTTGGCCCACTGGTGGACGGCAAACCGATT
TATACGCTCTACATTGCGCTTTCGATCGATTTTCATCTTCATTACATCAATGATTTGATGAATAAACTTATTATGACCGCATCGGTAATCAGCATCCTGA
TCGTCTTTATCGTGCTGTTGGCGGTACATAAAGGTCACGCGCCGATCCGCAGCGTCAGCCGTCAAATCCAGAACATTACCTCGAAAGATCTCGACGTTCG
CCTTGACCCGCAGACCGTGCCGATTGAGCTGGAACAGCTGGTACTGTCGTTCAACCATATGATCGAGCGTATTGAGGATGTCTTTACCCGCCAGTCCAAT
TTCTCAGCGGATATCGCCCACGAAATTCGCACACCTATTACTAATCTCATTACGCAAACGGAAATCGCCCTCAGCCAGTCGCGCAGCCAGAAAGAGCTGG
AAGATGTGCACTACTCTAATCTCGAAGAACTGACGCGAATGGCGAAAATGGTCAGCGATATGCTGTTTCTCGCTCAGGCCGATAACAACCAGCTAATCCC
CGAAAAGAAAATGCTCAACCTGGCGGATGAAGTCGGCAAAGTGTTCGATTTTTTCGAGGCGTTAGCAGAAGATCGCGGCGTGGAGCTGCGGTTTGTTGGC
GACGAGTGTCAGGTTGCGGGCGATCCGCTGATGCTGCGTCGGGCGTTAAGCAACCTGCTTTCTAATGCCCTGCGTTATACGCCAACCGGAGAGACAATTG
TTGTGCGCTGCCAGACGGTCGATCACCTGGTGCAAGTTACCGTCGAAAACCCCGGTACGCCCATTGCGCCCGAACACTTACCGCGATTGTTTGACCGTTT
CTACCGCGTTGATCCTTCCCGCCAGCGAAAAGGCGAAGGTAGCGGCATTGGTCTGGCGATAGTGAAATCGATTGTTGTCGCGCATAAAGGCACTGTTGCA
GTAACGTCAGATGCACGGGGGACAAGGTTTGTTATCATATTACCCGCTTAATCCTTCAGCAAACGGCAACTTTTATAACCAGTGTAAAAATAACATGCCG
CAATAGTAATACCTATTAATGATAAAAAGCTGTCACAATTCATAAAAAACCTTAATATACGCCACCCTAAACATAACCAGCGTTAATGTAAGGTTTTTGT
GTGGACTGGCTTCTTGATGTTTTTGCTACCTGGCTCTACGGCTTAAAAGTAATCGCGATAACGTTAGCGGTCATTATGTTCATCAGCGGGCTGGACGATT
TTTTTATTGATGTCGTCTACTGGGTACGCCGCATTAAACGCAAGTTGAGTGTTTATCGCCGCTACCCGCGAATGAGTTACCGCGAACTGTATAAACCAGA
TGAAAAACCGTTAGCGATTATGGTTCCGGCGTGGAATGAAACGGGCGTCATCGGCAATATGGCCGAGCTGGCGGCGACCACGCTCGACTACGAAAACTAT
CATATCTTTGTTGGCACCTACCCCAACGACCCCGATACTCAGCGTGATGTTGACGAAGTGTGCGCTCGCTTCCCGAACGTGCATAAGGTAGTCTGCGCGC
GTCCTGGCCCCACCAGCAAAGCCGACTGTCTGAACAACGTGCTGGACGCCATCACCCAATTTGAACGTAGCGCCAATTTCGCTTTTGCTGGTTTTATTCT
GCATGACGCCGAAGATGTGATTTCACCGATGGAATTGCGTCTGTTCAACTATCTGGTCGAGCGTAAAGATCTGATTCAGATCCCAGTGTATCCGTTCGAA
CGCGAATGGACGCACTTCACCAGCATGACCTACATTGATGAGTTTTCAGAACTGCATGGCAAAGATGTTCCGGTGCGTGAAGCCCTCGCCGGACAGGTGC
CCAGCGCAGGCGTCGGTACCTGTTTCAGCCGCCGCGCCGTGACCGCACTGTTAGCTGACGGTGACGGTATTGCTTTCGACGTGCAGAGTCTGACTGAAGA
TTACGACATTGGCTTCCGCCTGAAAGAGAAAGGTATGACGGAAATTTTTGTCCGTTTTCCGGTGGTGGACGAAGCCAAAGAACGCGAGCAGCGTAAATTT
TTACAGCATGCGCGGACGTCAAACATGATCTGCGTGCGCGAATATTTCCCCGATACCTTTTCGACTGCGGTTCGGCAAAAATCTCGCTGGATCATCGGCA
TTGTTTTCCAGGGCTTTAAAACCCACAAATGGACCTCCAGCCTGACGCTGAACTACTTTCTCTGGCGCGACCGCAAAGGGGCAATCAGTAACTTTGTCAG
CTTCCTCGCGATGCTGGTGATGATCCAGCTTTTGCTGTTGCTGGCGTATGAAAGTTTGTGGCCCGATGCCTGGCATTTCCTTTCTATTTTCAGCGGCAGC
GCATGGTTAATGACTCTGCTGTGGCTAAACTTTGGCTTGATGATTAACCGCATCGTGCAGCGGGTGATTTTCGTTACTGGCTACTACGGCCTGACGCAGG
GGCTGCTATCTGTCCTGCGTCTTTTCTGGGGCAACCTGATTAACTTCATGGCCAACTGGCGCGCGTTAAAACAGGTACTTCAACACGGCGATCCACGTCG
TGTCGCGTGGGATAAAACAACGCATGACTTCCCCAGCGTGACTGGCGATACCCGCTCGTTGCGTCCGTTAGGCCAAATCCTGCTGGAAAATCAGGTCATC
ACTGAAGAACAACTCGATACAGCACTGCGTAATCGCGTCGAAGGTCTACGCCAGGGCGGTTCAATGCTGATGCAGGGGCTGATTAGCGCCGAGCAACTGG
CACAGGCGCTGGCAGAGCAAAACGGCGTGGCGTGGGAATCCATCGATGCCTGGCAGATCCCTTCCTCGCTGATTGCCGAAATGCCGGCCTCCGTGGCGTT
GCATTATGCGGTACTGCCGCTGCGTCTGGACAATGATGAGTTAATTGTCGGCAGTGAAGATGGTATTGACCCGGTTTCGCTGGCGGCCCTGACGCGTAAA
GTCGGACGCAAAGTGCGTTACGTCATTGTTCTGCGGGGACAAATTGTCACCGGATTACGCCACTGGTATGCACACCGACGCGGTCACGATCCGCGGGCAA
TGTTGTACAATGCAGTTCAGCATCAGTGGCTCACGGAACAGCAGGCCGGTGAAATCTGGCGGCAATATGTGCCGCATCAGTTCCTGTTCGCAGAAATACT
GACCACGCTCGGTCATATTAATCGTTCAGCAATTAACGTGTTGTTATTGCGCCATGAACGCAGTTCTCTGCCGCTCGGCAAGTTTTTGGTCACCGAAGGT
GTTATCAGCCAGGAAACGTTGGATCGCGTCCTGACAATTCAACGCGAATTACAAGTTTCGATGCAATCACTATTACTCAAAGCAGGTTTAAACACAGAAC
AGGTTGCACAACTGGAGTCCGAAAATGAAGGAGAATAACCTTAATCGCGTCATCGGATGGTCTGGTTTACTGCTGACGTCTTTATTGAGTACCAGCGCAC
TCGCAGACAATATCGGCACCAGCGCAGAAGAGCTGGGGCTGAGCGATTATCGCCATTTTGTTATTTATCCCCGTCTCGATAAGGCGCTGAAGGCACAGAA
AAATAACGACGAAGCAACCGCCATCCGCGAATTTGAATATATACACCAGCAGGTGCCGGATAATATTCCGCTGACTTTATACCTTGCGGAAGCCTATCGC
CATTTTGGTCATGATGACCGGGCGCGGCTGTTGCTTGAGGATCAACTGAAACGTCACCCTGGAGATGACCGGCTTGAGCACAGTCTGGCGGCTATTCCAG
TTGAAGTGAAAAGCGTTACGACTGTTGAAGAACTGCTTGCCCAGCAAAAAGCGTGCGATGCTGCGCCGACCCTGCGTTGTCGCAGTGAAGTCGGGCAGAA
TGCTCTGCGGCTGGCACAATTACCTGTCGCCAGAGCGCAACTAAACGATGCGACGTTTGCTGCATCGCCGGAAGGAAAAACGTTGCGAACCGATCTGCTG
CAACGGGCAATCTACCTGAAACAATGGTCCCAGGCAGATACGCTATATAATGAAGCACGCCAGCAGAACACATTAAGCGCGGCAGAACGCCGTCAGTGGT
TTGACGTGCTTCTTGCCGCGCAGCTGGATGATCGGATCCTGGCGCTGCAATCACAGGGGATCTTCACCGATCCTCAGTCATATATTACTTACGCGACCGC
GCTGGCTTATCGTGGCGAAAAAGCACGCCTCCAGCATTATCTCATTGAAAATACGCCGCTATTTACCACGGACGCACAAGAGAAAAGTTGGCTCTATCTG
TTATCTAAATACAGCGGCAACCCCGTTCAGGCGTTAGCGAATTATACGGTACAGTTTGCCGACAACCGCCAGTATGTTGTTGGCGCGACGCTACCGGTGC
TGTTAAAAGAAGGTCAGTACGACGCAGCGCAAAAACTGCTCGCCACCCTCCCCGCCAATGAAATGCTTGAGGAGCGTTATTCCGTTAGCGTGGCGACCCG
TAACAAGGCTGAAGCTCTGCGTCTGGCACGATTGCTGTATCAGCAAGAACCGGCAAATCTTACCCGCCTGGATCAACTGACCTGGCAACTGATGCAGAAC
GAGCAGTCACGCGAAGCTGCCGATTTATTGCTGCAACGCTATCCTTTCCAGGGCGATGCGCGTGTCAGCCAGACTTTAATGGCGCGACTGGCGTCTCTGC
TGGAAAGTCATCCTTACCTGGCAACTCCGGCGAAGGTGGCGATTTTATCGAAACCCTTACCGCTGGCGGAGCAACGTCAGTGGCAAAGTCAGTTGCCGGG
TATTGCAGATAATTGCCCGGCAATAGTTCGCTTGCTGGGCGATATGTCGCCTTCCTACGATGCCGCCGCCTGGAACCGTCTGGCAAAGTGTTATCGGGAC
ACGCTACCCGGTGTGGCGTTGTATGCATGGCTTCAGGCCGAACAACGACAACCGGACGCCTGGCAACATCGTGCGGTAGCCTATCAGGCGTATCAGGTTG
AGGACTACGCCACCGCACTGGCGGCCTGGCAGAAAATCAGTCTTCACGACATGAGCAATGAGGATCTGCTTGCTGCTGCCAATACCGCCCAGGCGGCAGG
AAATGGTGCGGCTCGCGATCGCTGGCTTCAGCAGGCAGAACAACGTGGGCTGGGAAACAATGCCCTCTACTGGTGGCTGCATGCGCAACGTTACATTCCT
GGTCAGCCGGAACTCGCACTGAACGATCTCACGCGCTCAATCAATATTGCGCCTTCTGCCAACGCTTACGTTGCGCGGGCGACAATTTATCGCCAACGTC
ATAATGTCCCGGCGGCGGTGAGTGATTTGCGCGCCGCGCTGGAACTGGAACCGAATAATAGCAACACCCAGGCAGCGCTCGGTTACGCCTTGTGGGATAG
CGGTGATATCGCACAGTCGCGGGAAATGCTCGAACAGGCGCATAAAGGGCTACCGGACGATCCGGCACTTATCCGACAACTGGCCTACGTGAACCAGCGT
CTGGATGACATGCCTGCGACGCAGCACTACGCCCGGCTGGTGATTGATGACATTGATAATCAGGCGCTGATAACCCCACTGACCCCAGAGCAAAATCAGC
AACGCTTCAATTTCCGCCGTCTGCATGAGGAGGTCGGTCGCCGCTGGACGTTCAGTTTCGATTCTTCTATCGGCTTGCGTTCCGGCGCAATGAGTACCGC
TAACAATAATGTCGGCGGCGCAGCGCCAGGGAAAAGCTATCGTAGCTACAGGCAACTGGAAGCCGAGTACCGCATCGGACGCAATATGCTGCTGGAAGGC
GACCTGCTCTCAGTTTATAGCCGCGTCTTTGCCGATACCGGAGAAAACGGGGTGATGATGCCGGTGAAAAATCCGATGTCCGGCACCGGTCTGCGCTGGA
AGCCGCTGCGCGATCAGATCTTTTTCCTCGCCGTCGAACAGCAGTTGCCGCTGAACGGGCAAAATGGCGCATCCGATACCATGCTGCGCGCCAGCGCCTC
ATTCTTTAATGGCGGCAAATACAGCGACGAATGGCACCCGAACGGTTCAGGCTGGTTTGCCCAAAACCTGTACCTCGATGCGGCGCAATATGTCCGCCAG
GATATTCAGGCGTGGACGGCAGATTATCGCGTAAGCTGGCATCAGAAGGTGGCGAACGGACAGACTATTGAGCCTTACGCTCACGTTCAGGACAACGGTT
ATCGTGATAAAGGCACTCAGGGCGCGCAGCTTGGCGGTGTCGGGGTCCGCTGGAATATCTGGACCGGCGAGACGCACTACGACGCCTGGCCGCACAAAGT
CAGTCTCGGCGTCGAATATCAACATACCTTTAAGGCGATTAATCAACGTAACGGAGAGCGCAACAACGCGTTTCTCACCATTGGAGTGCACTGGTAAATG
CGTAAGTTCATTTTCGTATTGCTGACACTGCTTTTGGTCAGCCCTTTTTCCTTTGCGATGAAAGGTATTATCTGGCAACCACAAAACCGTGATAGTCAGG
TTACCGATACCCAGTGGCAGGGGCTGATGAGTCAGTTACGTTTGCAAGGCTTCGATACCCTGGTTTTGCAATGGACCCGTTACGGCGATGCATTCACCCA
GCCAGAACAGCGCGCGTTATTGTTTAAGCGTGCCGCAGCTGCGCAACAGGCTGGCCTGAAGCTGATTGTCGGGCTGAATGCCGATCCGGAATTTTTTATG
CACCAGAAACAGTCATCCGCGGCGCTGGAAAGCTATCTTAATCGCCTGCTGGCTGCCGATCTCCAGCAAGCCAGATTATGGAGCGCCGCGCCTGGCGTAA
CGCCGGATGGCTGGTACATCAGCGCGGAAATTGACGACCTGAACTGGCGCAGCGAAGCCGCCCGTCAACCTTTGCTGACATGGTTAAACAACGCGCAGCG
GTTGATTAGCGATGTTTCAGCAAAACCGGTTTATATCAGTAGTTTTTTCGCCGGAAACATGTCGCCCGATGGCTATCGCCAACTGCTGGAACAAGTTAAA
ACAACCGGCGTTAATGTCTGGGTACAGGATGGCAGCGGCGGGGATAAACTGACCGCTGAACAGCGTGAACGTTATCTACAGGCCAGCGCCGATTGCCAAA
GTTCCGCCCCTGCCAGCGGCATTGTTTATGAACTGTTTGTCGCCCGCAAAGGCAAAACCTTTACAGCGAAACCGAAACCGGATGCAGAGATCGCCTCGCT
GTTAGCGAAACGTTCCTCTTGCGGTAAAGACACGCTCTATTTCTCTCTGCGCTATTTGCCCGCCGCGCAGAGTATCCTTGAGTATTAATGATTAAAGGGA
GCAACTTAGCTTGCTCCTTTCCTTTTCACTTTCCTAATCAAAATCCTGGCAAGATGAATTGTTTAGCAGAATTTCTGTTTTCATTTTATTCGTCTGAAGT
GTTCCAATTATTTAGCAAAACCGCGACAACAAAGTGATGGTGTAATTTGTAAAAGGGAACAAATAAATGGCGAGGAAATGGCTCGCCCTGCAGGATTCGA
ACCTGTAGCCCACGACTTAGAAACTCCAGGAACGACATTTTAAATCAACAAATTACCGCGCCATCTCTGCGTTCACACGTTCCACCACCTCAAAATATGT
AAAACCTTGCAAGCCATTGCGAGGCCTTATGTGTCTCAGTTTTGTTCCTCTTTTTTATACTAAAAAACACAGCAATTGAGGATAAACCTCATGCTATTAT
CGCTAATATGCATCTAAAGGCATGGCACTTGAATAGATAAAAACTCCACAAAGAAAAAATAATTAGCCCATAAAACCACAATGCAAAACACAAACAGACA
ATTAAACTAAAAAACGGACAGTGCATTGTGACAAAAATTCAATGTTAAACAAAATATAAACAGTGGTGCAATATACAATTGACTCATTAAGTTAGATATA
AAAAATACATACTCAATCATTAAAACGATTGAATGGAGACCTTTTATGCGGGCGAAACTTCTGGGAATAGTCCTGACAACCCCTATTGCGATCAGCTCTT
TTGCTTCTACCGAGACTTTATCGTTTACTCCTGACAACATAAATGCGGACATTAGTCTTGGAACTCTGAGCGGAAAAACAAAAGAGCGTGTTTATCTAGC
CGAAGAAGGAGGCCGAAAAGTCAGTCAACTTGACTGGAAATTCAATAACGCTGCAATTATTAAAGGTGCAATTAATTGGGATTTGATGCCCCAGATATCT
ATCGGGGCTGCTGGCTGGACAACACTCGGCAGCCGAGGTGGCAATATGGTCGATCAGGACTGGATGGATTCCAGTAACCCCGGAACCTGGACGGATGAAA
GTAGACACCCTGATACACAACTCAATTATGCCAACGAATTTGATCTGAATATCAAAGGCTGGTTCCTCAACGAACCCAATTACCGCCTGGGACTCATGGC
CGGATATCAGGAAAGCCGTTATAGCTTTACAGCCAGAGGTGGTTCCTATATCTACAGTTCTGAGGAGGGATTCAGAGATGATATCGGCTCCTTCCCGAAT
GGAGAAAGAGCAATCGGCTACAAACAACGTTTTAAAATGCCCTACATTGGCTTGACTGGAAGTTATCGTTATGAAGATTTTGAGCTAGGTGGCACATTTA
AATACAGCGGCTGGGTGGAAGCATCTGATAACGATGAACACTATGACCCAGGAAAAAGAATCACTTATCGCAGTAAAGTCAAAGACCAAAATTACTATTC
TGTTGCAGTCAATGCAGGTTATTACGTAACGCCTAACGCAAAAGTTTATATTGAAGGCGCATGGAATCGGGTTACGAATAAAAAAGGTGATACTTCACTT
TATGATCACAATGATAACACTTCTGACTACAGCAAAAATGGTGCAGGCATAGAAAACTATAACTTCATCACTACTGCTGGTCTTAAGTACACCTTTTAAC
AACGTTAAATAGATTTTCTCCCGGTGGTATTGTATAGCCCCGGGGAATTTGTTTACCGTTAAAAGCAAACAATATCCCCTAATATTGTAAGCATTTAACC
TGCGTCCTGGCGTGTAACCTCTTACCGCAACACAAGACCCAATATATTCAAATTCGTTATGCCGTGGCATCATTTAACCCCTTGTAATTCATCGCTATAA
TTGATTTAATTCACAAATAAAACTATAACACGGTGAAACTAATGAAAAAAAACACAGATGATGGGGCTAAAATTTACACACCACTTACCCTAAAGCTTTA
TGACTGGTGGGTTTTGGGAGTATCAAATCGGCTTGCATGGGGATGTCCTACAAAGGAACACCTTCTTCCACACTTTCTGGAACATTTAGGTAACAACCAT
CTGGATATTGGTGTTGGAACTGGGTTTTACCTTACTCACGTACCTGAGAGTAGTCTGATATCTTTAATGGATTTGAACGAAGCTAGCCTGAACGCGGCAT
CGACAAGGGCTGGGGAATCAAAAATTAAACATAAAATTAGCCATGATGTTTTTGATCCTTATCCCGCGGCGTTACATGGTCAATTTGATTCCATTTCCAT
GTTTTACCTTCTTCACTGCCTGCCTGGAAATATATCTACAAAAAGCTGTGTAATACGCAATGCGGCGCAGGCCTTAACTGACGATGGAACTCTATACGGA
GCCACAATTCTTGGTGACGGCGTTGTGCACAATAGCTTCGGTCAAAAACTGATGCGCATTTACAATCAGAAAGGCATCTTTTCAAACACAAAAGATTCCG
AAGAAGGCTTAACACATATACTCTCAGAGCATTTCGAGAATGTTAAAACCAAGGTTAAAGGTACTGTAGTAATGTTTTCCGCTTCAGGGAAAAAATAGCA
TCCAGCCGCAGCACGTTCTTGCGCACGACGTGCTGCGGCATAATCCCAATGATTACTCTCTGACAGGGTTCACAGGCCACTCAATATCAGGGGCAGTTGA
TGTATCAACTCGGTTCAGCAACACCCGATACATCTTCCAGGCTTCCAGCAACGAGGTTTCTTCCTCCGTATCCTTTATCCATGATATGCCGTTCCACTTC
TGAAACTCCCCTGCCGGGGATACCAGGTGACATTTTCCGGTAACGGACCGAGTTCAGAAATAAATAATGCGTCCCCTGATGCCACGTCATAAACCGTTTT
ACCCCGATGGTCTTCAACGAGATGCCACGATGCCTCATCACTGTTGAAAACAACCACGAAGCCAGCCGGAATATCTGGGCAATATCAGTACTGTTTGCAG
GCAAACCTGTATGAGGTGTAATGGCACAAGAGACTTACAAAAGAATCAGGCAAAACGCCTGATTGATGAGAGCCCCGAACCACTGAAATCTGTCGTCAAA
TTTGCGCTGGTAACTGTTCTGAGAAAGTCGAACATCATAAATCTGGAGTGGCAACAGATTGACATGCAGCGACAAGTTGCCAGGGTGAATCCAGAAGATA
GCAAATCAAACCGCGCCATTGGTGTGGCGCTGAACGATACCGCCTCTAAAGTGCTGCATGATCAAACAGGCAAGCATCACAAATGTGGGTGTACATACCA
GGGCGGCTAAGCGAGCAGATGGAACATCAATGCCTGCGCTCAGGAAGATGCGCATTGACAGCAAGACAGCATGGCTATCAGCTTGTCGTCGTGCAGGAAT
TGAAAATTTCCGTTTCCATGACCTCAGACATACTTGGGCAAGCAGGTTGATTCCGTCAGGTGCCCCATTATCAGTGCTTCAGGAAATGGGCGGATGGGAG
TCCAAAGAAATGGTTCGTAGATATGCTCACCTTGCGCCTAATCATTTGACTGAGCACGCGAGGAAAATAGACGACATTTTTGGTGATAATGTCCCACTCT
GGAATTATAGAAGAAATAAAGAAGGCGTAACTGATTGAATTTTAATGGCGCGCCCTGCAGGATTCGAACCTGCGGCCCACGACTTAGAAGGTCGTTGCTC
TATCCAACTGAGCTAAGGGCGCATTGATACCACGGTGTGCTGTAATCGCGTGAATTATACGGTCAACCCTTGCTGAGTCAATGGCTTTTGAACCAGTTGC
TGAACAAGTGTACGACCGCATCTGATGTAGCTCACTATGGCGGCAAACCAACGACGGTTATCATGATAGGTGTGAATCAGCCAGGTACAGAAGGTTTTAC
TTTTCAGAAAACGAAAACTGACAGCGCGCCACGCTTCTGACAAAATAGACACATCCCCTTCGACCTACGTAACAGATGGAATCCTCTCTCTGATGGCAGC
AAAGATTATTGACGGTAAAACGATTGCGCAGCAGGTGCGCTCTGAAGTTGCTCAAAAAGTTCAGGCGCGTATTGCAGCCGGACTGCGGGCGCCAGGACTG
GCCGTTGTGCTGGTGGGTAGCAACCCTGCATCGCAAATTTATGTCGCAAGCAAACGCAAGGCTTGTGAAGAAGTCGGGTTCGTCTCCCGCTCTTATGACC
TCCCGGAAACCACCAGCGAAGCGGAGCTGCTGGAGCTTATCGATGCGCTGAATGCCGACAACACCATTGATGGCATTCTGGTTCAACTGCCGTTACCGGC
GGGTATTGATAACGTCAAAGTGCTGGAACGTATTCATCCGGACAAAGACGTGGACGGTTTCCATCCTTACAACGTCGGTCGTCTGTGCCAGCGCGCGCCA
CGTCTGCGTCCCTGTACCCCGCGCGGTATCGTCACGCTGCTTGAGCGTTACAACATTGATACCTTCGGCCTTAACGCCGTGGTGATTGGCGCATCGAATA
TCGTCGGTCGCCCAATGAGCATGGAACTGCTGCTGGCAGGTTGCACCACCACCGTGACTCACCGTTTCACTAAAAATCTGCGTCACCACGTAGAAAATGC
CGATCTACTGATCGTTGCCGTCGGCAAGCCGGGCTTTATTCCTGGTGACTGGATCAAAGAAGGCGCAATTGTGATTGATGTCGGCATCAACCGTCTGGAA
AATGGCAAAGTTGTGGGCGACGTCGTGTTTGAAGACGCGGCTAAACGCGCCTCATACATTACGCCTGTTCCGGGCGGCGTTGGCCCGATGACGGTTGCCA
CGCTGATTGAAAACACGCTACAGGCGTGCGTTGAATATCATGATCCACAGGGTGAGTAACATGGCGACATTTTCTTTAGGTAAACATCCGCACGTTGAGC
TGTGCGACTTGCTGAAACTGGAAGGCTGGAGCGAAAGCGGCGCGCAGGCGAAAATCGCGATAGCAGAAGGCCAGGTGAAAGTCGACGGTGCGGTTGAAAC
GCGTAAACGCTGCAAAATCGTCGCCGGTCAGACAGTGAGTTTTGCAGGTCACAGCGTACAGGTTGTTGCCTGATCCCTTTCCCGGCCTGTATCAACAGGC
CGGTTCTCTTTTCAGACTTTTGCCCTCTACGCCCCGTTCATCCATGCTGATAGCATCGACATTTTGCCGAAGCGACCATCATGCCAACCGTTATTACGCA
CGCCGCCGTTCTCCTATGCATTGGTTTAGGGTTGGGTTCGAAAGCCATCCCTCCGCGTCTGTTATTTGCCGGAATCATCCTGGCGATGCTGCCCGATGCC
GACGTCTTGTCGTTTAAATTTGGCGTTGCTTACGGCAATGTTTTTGGTCATCGCGGGTTTATCCATTCGCTGGTGTTTGCGTTTGTTGTCCCGCTGTTAT
GTGTGCTGATTGGGCGTCGATGGTTCAGGACTGGGCTGATTCGCTGCTGGCTGTTTTTAACCGTCTCGTTGCTATCGCACAGCTTGCTGGATTCGGTAAC
CACTGGCGGTAAAGGGGTTGGCTGGCTGTGGCCGTGGTCAGATGAACGCTTTTTCGCTCCCTGGCAGGTGATTAAAGTCGCGCCGTTTGCATTGTCTCGT
TACACCACGCTGTACGGGCATCAGGTGATTATTTCTGAATTGATGTGGGTGTGGTTGCCGGGGATGCTACTGATGGGAATGTTGTGGTGGCGCAGACGAT
AACCGGATGCGAAAACTCGCATCCGGCAATAGCGCAATTACTTACGACGCCAGGTGGTCCCTTGCGGGCCATCTTCCAGCACGATCCCCATCTCGTTAAG
ACGGTCACGCGCCGCATCTGCCGCCGCCCAGTCTTTCGCTTTACGGGCATCCAGACGCTGTTGAATTAACGCTTCAATCTCAGCCACTTCGCTGTCGTCT
GCCTGCGCACCGCTTTGCAGGAACGCTTCCGGTTCTTGCTCCAGCAGGCCCAATACGGCAGAAAGTTTACGCAGGTGAGACGCCATTGCATTCGCCGCTG
CCATATCTTCTGCTTTCAGACGGTTCACTTCACGCGCCATATCAAACAGCACGGAATAGGCTTCCGGGGTGTTGAAATCGTCGTCCATTGCTTCAATAAA
GCGCGCTTCAAACGCTTCGCCACCAGCAGGCGCAACGGTTTTGTCTGTGCCGCGCAAGGCAGTATAGAGACGTTCCAGCGCCGCACGCGCCTGTTTCAGG
TTCTCTTCGCTGTAGTTCAACTGACTGCGATAGTGACCCGACATCAGGAAGTAACGCACAGTTTCCGCATCGTAGTATTTCAGCACGTCACGCACGGTGA
AGAAGTTACCCAGCGATTTAGACATCTTCTCGCGGTCAACCATCACCATACCGGAATGCATCCAGTAGTTCACATACCGGCCATCGTGCGCACAGGTGGA
CTGGGCAATTTCGTTCTCGTGGTGCGGGAACATCAGGTCAGAACCGCCGCCGTGGATATCAAAGTGGTTACCCAACTGTTTGCAGTTCATTGCCGAACAC
TCAATGTGCCAGCCAGGACGACCCGCGCCCCACGGAGACGGCCAGCTCGGTTCGCCCTCTTTCGACATCTTCCACAGAACGAAGTCCATCGGGTTGCGTT
TGTCGTCGACCACGTCAACGCGCGCGCCTGCCTGCAGCTGATCGAGATCCTGACGCGACAGCACGCCATATGTCGGATCGGTCGGGACGTCGAACATCAC
GTCGCCGTTGTCCGCCACATAAGCGTGACCTTTGGCGATCAGTTGTTCAGTGAGTTCAATAATTTCGGCGATATGGTGCGTCGCGCGCGGCTCCATATCC
GGGCGCAGAATGTTCAAAGCATCAAAATCTTTGTGCATTTCGGCGATCATGCGATCCACCAGCGCCACAAAGCTTTCGCCATTTTCATTGGCGCGTTTGA
TGATTTTGTCGTCGATATCGGTAATGTTGCGCACATACTTCAGCTTATAGCCGAGGAAACGCAGATAGCGCGCAACCACGTCAAAGGCAACAAAGGTACG
CCCGTGACCGATATGACAGAGATCGTAAACGGTGATTCCACACACGTACATGCCGACTTCCCCGGCGTGAATAGGCTTAAATTCCTCTTTTTGGCGTGTC
AGAGTATTGAAGATTTTTAGCATCGAAGATTCCGTTTAGACATGTGTGGGTAATTGAGTTGCGTATAATACCCATATTTCCCGCGCGAATCAGCATACAT
TGCGAGATGATCCGATCGTGCGGTTATGCTATAACACCACCCTATATATGACCCGAACCGGGTTGAAGCACCAATCAAACGGAACAGGATGCAAAAATGG
TTACTTTCCACACCAATCACGGCGATATTGTCATCAAAACTTTTGACGATAAAGCACCTGAAACAGTTAAAAACTTCCTGGACTACTGCCGCGAAGGTTT
TTACAACAACACCATTTTCCACCGTGTTATCAACGGCTTTATGATTCAGGGCGGCGGTTTTGAACCGGGCATGAAACAAAAAGCCACCAAAGACCCGATC
AAAAACGAAGCCAACAACGGTCTGAAAAATACCCGTGGTACGCTGGCAATGGCCCGTACTCAGGCACCGCACTCTGCAACTGCCCAGTTCTTCATCAACG
TGGTTGATAACGACTTCCTGAACTTCTCTGGCGAAAGCCTGCAAGGTTGGGGCTACTGCGTATTTGCTGAAGTGGTTGAAGGCATGGACGTGGTAGACAA
AATCAAAGGTGTGGCAACCGGTCGTAGCGGTATGCACCAGGACGTGCCAAAAGAAGACGTTATCATTGAAAGCGTGACCGTTAGCGAGTAATCGTGGCGA
CACTCTTTATTGCAGATCTTCATCTCTGCGTGGAAGAACCGGCGATCACCGCCGGTTTTCTGCGTTTTTTAGCGGGGAGGCCCGCAAGGCCGATGCGCTG
TATATTCTTGGCGATCTGTTTGAAGCCTGGATCGGCGACGACGATCCCAACCCACTTCATCACCAGATGGCGGCAGCGATCAAAGCGGTGTCCGATTCCG
GCGTTCCCTGTTATTTCATTCATGGCAACCGTGATTTTCTGCTCGGCAAACGCTTTGCCCGTGAAAGCGGCATGACGTTATTGCCGGAAGAGAAGGTGCT
CGAACTTTATGGTCGTCGGGTGTTGATTATGCATGGCGACACGCTGTGCACCGATGACGCGGGTTATCAGGCTTTTCGCGCCAAAGTCCACAAACCCTGG
CTGCAAACGCTATTTCTCGCCCTGCCGTTGTTTGTGCGCAAACGCATTGCCGCGCGAATGCGAGCGAACAGCAAAGAAGCCAACAGCAGTAAATCGCTGG
CGATCATGGACGTTAACCAAAACGCGGTGGTCAATGCGATGGAAAAACATCAGGTGCAATGGCTGATTCACGGGCATACCCATCGCCCGGCAGTACATGA
ACTTATCGCCAATCAGCAACCTGCTTTCCGCGTCGTGCTGGGTGCCTGGCATACGGAAGGTTCAATGGTGAAAGTCACGGCGGATGACGTTGAGCTGATT
CATTTCCCGTTTTAAAAACCCGCAACTTTGCTGATTTCACAGCCACGCAACCGTTTTCCTTGCTCTCTTTCCGTGCTATTCTCTGTGCCCTCTAAAGCCG
AGAGTTGTGCACCACAGGAGTTTTAAGACGCATGTCTTCCCGCAATAATCCGGCGCGTGTCGCCATCGTGATGGGGTCCAAAAGCGACTGGGCTACCATG
CAGTTCGCCGCCGAAATCTTCGAAATCCTGAATGTCCCGCACCACGTTGAAGTGGTTTCTGCTCACCGCACCCCCGATAAACTGTTCAGCTTCGCCGAAA
GCGCCGAAGAGAACGGTTATCAGGTGATTATTGCGGGCGCAGGCGGCGCAGCGCACCTGCCTGGCATGATTGCCGCCAAAACGCTGGTGCCGGTGCTGGG
CGTGCCAGTACAGAGCGCCGCACTGAGCGGTGTCGATAGCCTCTACTCCATCGTACAAATGCCGCGCGGCATTCCGGTGGGTACGCTGGCGATTGGTAAA
GCTGGCGCGGCAAACGCGGCGTTACTGGCAGCACAAATTCTTGCGACTCATGATAAAGAACTGCACCAGCGTCTGAATGAATGGCGCAAAGCACAAACTG
ATGAAGTGCTGGAAAACCCGGACCCGCGAGGTGCGGCATGAAACAGGTTTGCGTCCTCGGGAACGGGCAGTTAGGCCGTATGCTACGTCAGGCAGGCGAA
CCGTTAGGCATTGCTGTCTGGCCGGTCGGGCTGGACGCTGAACCGGCGGCGGTGCCTTTTCAACAAAGCGTGATTACCGCTGAGATCGAACGCTGGCCGG
AAACCGCATTAACCCGCGAGCTGGCACGCCATCCGGCCTTTGTGAACCGCGATGTGTTCCCGATTATTGCCGACCGTCTGACTCAGAAGCAGCTTTTCGA
TAAACTCCACCTGCCGACCGCACCGTGGCAGTTACTTGCCGAACGCAGCGAGTGGCCTGCGGTGTTTGATCGTTTAGGTGAGCTGGCGATTGTTAAGCGC
CGCACTGGTGGCTATGACGGACGCGGTCAATGGCGTTTACGCGCCGCTGAAACCGAACAGTTACCGGCTGAATGCTACGGCGAATGTATTGTCGAGCAGG
GCATAAACTTCTCTGGTGAAGTGTCGCTGGTTGGCGCGCGCGGTTTTGATGGCAGCACCGTGTTTTATCCGCTGACGCATAACCTGCATCAGGACGGCAT
TTTGCGCACCAGCGTCGCTTTCCCGCAGGCCAACGCACAGCAACAGGCGCAAGCTGAAGAGATGTTGTCGGCGATTATGCAGGAGCTGAGCTATGTAGGC
GTGATGGCAATGGAGTGTTTTGTCACCCCACAAGGTCTGCTGATCAACGAACTGGCTCCGCGTGTGCATAACAGTGGGCACTGGACACAAAACGGTGCCA
GCATCAGCCAGTTTGAGCTACATCTGCGGGCAATTACCGATCTGCCGTTACCGCAACCAGTAGTGAATAATCCGTCGGTGATGATCAATCTGATTGGTAG
CGATCTGAATTATGACTGGCTGAAACTGCCGCTTGTGCATCTGCACTGGTACGACAAAGAAGTCCGTCCGGGCCGTAAAGTGGGGCATTTGAATTTGACC
GACAGCGACACATCGCGTCTGACCGCGACGCTGGAAGCCTTAATCCCACTGCTGCCGCCGGAGTATGCCAGCGGCGTGATGTGGGCGCAGAGTAAGTTCA
GTTAATTGATGCTCATTTTCTTGCCGCATGCGGCGTGAACGCCTTATCAGGCCTACCGTTCCAACACCGACTGTAGGCCTGATAAGATGCGCCAGCATCG
CATCAGGCATGGTGTGCCGATTGCCGGATGCGGCGTGAACGCCTTATCCGGCCTACCGTTCCGACACCGCCTGTAGACCTGATAAGACGCGCCAGCATCG
CATCAGGCTAGATGTGCCAATTGCCTGGTGCCCATCACTACAGCGAAATACAAGTCCCCGCTTCGCCCGCCAGCGTCTCTTCAATCCGCGATAACGCCCC
AATCCACGCGGGTTTACCACGGCTTCTGACATAGCCACTCACCGCCGTTACCTTCGGCCCCATCGAACCATCGGCTTTGGCAAATGGCGCTAACTCATCC
GGTGTGGCATGGCGAATGGCACGTTGCTGCGGCGTTCCCCAGTTTTCATATACCGCATCAGCATCGGTGAGGATCACCAGTCCATCGGCATTAATCTGCT
CGGCGAGCAACGCAGCGGCGAGATCTTTATCAATCACCGCTTCACTCCCTGCCCCGTCTTCCGCCACAGGCACACCGCCGCCGCCACTGCAAATCACCAC
ATGCCCCTCTTTGAGCAACAACTCGATGGCTTCGCTGTCGAGAATTTTACGCGGTTGCGGAGACGCCACCACCCGGCGTAAATATTTACCATCACGTTTC
ATCTGCCAGCCGTAAGCCGCTTCCAGTGCCTCTTGTTCTTCTGGCTGATAAACCGGACCGATAAACTTCTCTGGCTGTAAAAACGCCGGATCATCAGGCG
AAACCTCAATGCGCGTCAGCACCGTCGTGACAGGCGGCATCTGCGGCTGTGCGCTCAAGCTCTGCGCCAGCATATAGCCAATCATCCCCTGGCTTTCCGC
CACCAGTACATCCAGCGGATACGGTTCTACCTCTTTCCACGCCAGATTCTGTAACGCCAGCAGCCCCACCTGCGGTCCGTTGCCGTGAACAATCGCCAGC
CGATAAGAACGGGCCAGGCGCGCCAGCGCGGGTACAGCACTGGCAATATTGCGATATTGATTTTCTGCCGTCAGCGCCTCACCGCGCTGGAGTAAGGCGT
TGCCCCCAAGAGCCACAACCAGTGTTTTCATGGTTTTCCTTGTAATAATTGTTGGCCAAGCCAGAACCCCAGCAGCGTATCGGCCCCTGACGTATGCCCC
AGCGCCAGCAGCGAATCGATCGCCGCTGCGGTACGTTTCGGGCAACTCAGAGCATGAACAAAGTGCAGGAGTGGCGAGGCGAAATATCCTTGCGCGGCAT
AACGTAAATAACTGACGCTCACCGCAGTGGTAACGAGTTGAAGATTGTCGGAACAGGCAAAAAACGGGCGACCGGAGCGCGCATCTAAAGCGCCATAATA
CCAGGCCGCCAGCAGCATTCCGCTCAGCGTGTCATCATGACTTGGCGTTAATCCGGGGCCTTTACCCAGCCAGTGCCGCCAGTCGGTCTTAACGCCATTG
AGCGCGGCCTGAAAACAGTGACGAAACTGGCGTAATTCAGCAGGCAGCGGATCGCTTGCCGCCAATGCCAGTGGCCCGAAAAGCCCGGTTTCCTCCGCGC
GTTGCATCCATGCAACGGCAAGCGCTTGAGGATGCGCAGGCGGCGTAATACGTAGCAAACAATAACGCTGTGGCTGTTTAACCGTGAAACGCCCGAGGCG
AATCCCTTGTGCCACAACCTGTGGTCGTTCATTGCCGCATAATCCACCGCATAACGCATCGAATTGCGCGCGGCGAAGCACCCATCCGCCGGGGCCGAAA
CCACTCCCTGACGATGCAGCGTTAACAGTTCGCCGCTTTCCGTCATCAGGTTAATCGCCCGCCGCCACACTCCCGCTAACCGCCAGGACTGGCGATAATT
CGGTGCGCTACGGCTGGCAAGTAGAGGATGGATGATCGTCATTGTGCGTTCCTCAACCAATCCCCATGCTTTCAGCCAGTGCTTCCAGCGCCTGCTCAAA
GCACGCCAGCGGTGCCCGCACGGTGCCTGCGCCAATCTGCCCGATCCCCGCCTCTTTATGGGCGATACCGGTATTGATGAGTGGCGTAATGCCGGTTTCT
ACCACGCGACGAATGTCCAGCCCCAGGCACGCACCCTGGAAATCCCAGCCGGGGATCTGCAACTGCATATTGCGTTCAAGGTAAATTTCCGCCATCTCTT
CAGATACCGCTCTGGCCGCTTCCATGCCACCCGCACCGACAAAGCGCGTTACGCCAGGCGCTGCGATCATTGCCGCACCTCCGATACCAAAGGTTTCGGT
AATCGCGCTATCGCCCATATCCGGGTTCGCCTGCTCCTGCGAGAAGCCGGTGAAAAACAGACCTTGCGGAGTGTTTACAGGCGCAGTAAACCAGCGTTCA
CCCAGCCCGCTTACCCGAATCCCGAACATATTGCCGTTGCGGGTCATAGCCGTAATGATGCTGCCTGCGCGGATCATCGCGCCAGCATCCATCGCCGCCT
TGCAGTAGGCCATCGCGAGGTTGAGGAAGAACTGATCGGTCACGCTGAGGAAATCCATCACTTCCGCAATGTGCTGTTTATCATGATCGAGGCGAGCAAT
TTGTGGGGCCAGCGTACGCATTAACAGTGCTGAGGAAGCAATATTGCGTTGATGGAACTCATCGCCCATGGTAATGCCCTGCGCCATCATTGCCGTGAGA
TCGATACCGCGCTCCATGCGCCCCAGCGCCGCGCTTAATACTGGCATTAACACATCGCGCATCCAGCGATGGCGAGTCAGGACATCTTCGCCGTAAGCGC
CAAAACGCATCACTTTGCCGATACCTTCGTTGAGGTTGCAGTACGCCCGGTTGCCGTCGGTCACGTTCTCGACCACCAGCATCGGCATACTGGCAGAAGT
AATACCGCCCATTGGCCCGACAGCATTCACATGGTGACAAGGAATGAAGTTCACTTCCCCTGCTCCAGTATTGCCAGCGCCTGCGCTTCATCTTTCGCCC
AGCCTTCGAACAGACATGCGCCCACACATGCACCTTTCATGGGTCCGGTCATCTCCTGCCAGCGCATTGGCGGCCCGGCGTGAAGCAGTGTTTTGCCCTT
GTTTAGTTCGCTGATAAGTGAAGAAGACGGTTGCACATCCAGCCAGTGTGGACGAGCCCGACGAATTTGTTCGATAACCGCAGCATTGGCTTGCGCCACT
GATGTAAACATGGGAACCCCTTATTGCAAACGTTCTAATAAACGAGCCAGTTTTTTATTGCCGCCGGCGACTGGCGACCATTGGTAATGCACAACCGGTT
TGCTGGCGCTTTGTAGCTCCAGCGCAAAGCTGCGTAATCCGATGTTAATCACGGCGACGTTTTCCAGTAATGACGGTGTGTGTTGCTGTGTGGCAGGCGA
GAGCGGATGAATTAACGCCGCCGCCAGCAAGGTGGCTTCCGGTAGCGAACTCACTACCGCGATCCCCGCATCTTCCAGCGTGGCGATTTGCTGCGCGCGG
CATTGCGGGTCACGTTCAGTGCCTGTCACCGTGGCAATGGCATACAGTGGTTGATTGTCTGAACGCGCGGCACAGGCTTTTTGCCAGGCGCTCACCAGCG
AGGCGGCAGGATCGGCGGTCGCACCGAAGCCAATCACGACATCAAGCAGCAACACGCGCACTTGCGGTTTAGCGCCGAGATCGGCAATTAACAGGTTGCG
TAAGGTCGGGTCGATCATCGGATGGGGACGCCCGACGGTGTAAAAATCATCGCCCAGGTCGAGGATCTGATGTCCGTCGGCGTCCAGCATCATGCCATGT
TGATGGGTATCGTCGGCTTCCACGCCAAGGTGTCCGGCAAGTAATCCCGCCGCTTCAGCAGCCAGCGTACCGCCGGTATACAAACCGCAAATAAATCCGC
TGCTGGCAGGCGCTATCGCGTTACGTCGCGCAGTGACGCGTGAAAGCAGACAAGCCAGACGAGCGGCCTCATCCAGCGAGGAGGCAAACCAGACATTCTC
GTCGCGGGCCACCGCCGGGGTATAACCTAAAAACAGCGCCACCGTCGTTTTGCCAGTTGCTTTCATGGCATTAACAATTTTCAGACGCACAGTTTCGGCA
GGTGGTTTTGAAACAAATGCCAGCACTTCGCTTTTCTCGTCTGCACTGAGCATTTCCAGCGCCGTTAGCGCACTGATGCCGCCCACTTCACGGCTGAGAT
CGCGCCCGCCAAGACCAATCGCGTGAGTAATTCCCTCCCCTGCCAGCGCAATCTGTGAGCACAGCTCCTGAATCCCGGTACCGGAAGCGCCTATGACGCC
AATGTTGCCTTCCGGCATCACGTTAGCAAAAGCCAGCGGCGTGGCGGCAATCATCGACGTACCGCAGTCTGGCCCCATCACCAGCAAGCCTTTTTCCCGC
GCGCGGGTTTTAAGTTGGATTTCATCTTCCAGCGTGACGTTATCGGAGAACATCATCACGTTGAGGTTGCGATCCAGCGCCTGGTTCGCCAGCTCCGCCG
CATACTCACCAGCCACTGAAATCAGCGCCAGATTGGCATCGGGTAATTTCTGACTGGCACTGTCCCAGCGACGCACCTGCGTCAACGCCTGGCTGCTGCC
TGAACCCTGCGCCAGTTGTTTTAGCGCCTCTTCAAGCTGCTGCATAACCGCCTGCGCGATCCCCGCATCCGCCGCTTCGCTACGAATTGCCACGCAAATA
TCGTTCGGCGTGGCGTTATTAAAATCGTCATGCCAGAAACCTGTAGTATCTAATAACGCTTTATTGGCGGGCGTACCCATCATTACGGAAACATCATCAA
CATTTTCTGATTCGCTGAGTTTTCGTGAAATAATCATTAAACTGACCGAATCCTGAAAACACCCTTTTTTAATAAAGGCGTGGATCATAACAACTCCTTA
AAAATTGCACCCATGGCAATTGCACGAGCAGTGTTAATGTGGCGATTACGGTATCGATGACAACGAGTAAATAAGGTGATGAATATCACACGTGGATTAT
TAACAAAAGAATTCAAATAACCGCCAGACTATTACGCGTTATTTTTTAATAAGCATGGTTGTTTTAAAAACCAGGTTAAAAGCACGAAGATTATCAAATA
AATTCTAACTATATTTTTTTGCCTGTCTGGATCACATAATCCAGATATTTTCCCTGTATGTTAATTGCAGTCATGCTTCACACCGTCGTTAAAAAGGAAG
ACAGATGAAAATCAGTCGGGAAACACTCCACCAGCTAATCGAGAATAAACTCTGCCAGGCTGGGTTAAAACGTGAGCACGCTGCAACCGTGGCTGAAGTA
TTGGTTTACGCCGATGCCAGAGGGATCCACTCTCATGGCGCGGTGCGCGTTGAATACTACGCCGAACGCATTTCAAAAGGCGGCACCAACCGCGAACCGG
AGTTTCGTCTTGAGGAAACCGGACCGTGCTCGGCAATTTTACATGCCGACAATGCCGCCGGACAGGTCGCGGCGAAAATGGGTATGGAACATGCCATCAA
AACCGCCCAGCAAAAAGGCGTTGCGGTGGTCGGTATCAGCCGGATGGGTCACAGCGGCGCAATCTCTTATTTTGTGCAGCAGGCTGCCCGCGCCGGATTG
ATTGGCATTTCGCTGTGCCAGTCCGATCCAATGGTGGTGCCGTTTGGCGGCGCGGAAATTTACTACGGCACTAACCCACTGGCCTTTGCCGCGCCGGGAG
AAGGCGATGAGATCCTTACCTTCGATATGGCGACTACCGTACAGGCATGGGGAAAAGTGCTCGACGCCCGCTCGCGCAATATGTCTATCCCGGATACCTG
GGCAGTCGATAAAAACGGTGCACCAACAACCGATCCGTTCGCGGTACATGCTCTGCTCCCCGCCGCTGGGCCGAAAGGGTATGGCCTGATGATGATGATT
GACGTCCTCTCAGGCGTCTTACTCGGCTTACCGTTCGGGCGACAGGTTAGTTCGATGTATGACGATTTACACGCCGGGCGTAATTTGGGGCAATTACATA
TAGTTATTAACCCGAACTTTTTCTCCTCCAGCGAATTATTCCGTCAACATCTTAGCCAGACCATGCGCGAATTAAATACCATTACCCCCGCGCCCGGTTT
TAATCAGGTTTATTATCCCGGACAGGATCAGGATATTAAACAACGCAAAGCCGCCGTCGAAGGCATCGAAATTGTTGATGATATTTACCAGTATTTAATT
TCCGACGCGCTTTATAACACGTCATACGAAACGAAAAATCCCTTTGCGCAATAATTATTGAGACAGGACTTTCTTATGATTACACATTTCCGTCAAGCTA
TAGAAGAAACGCTGCCCTGGCTTTCCTCTTTTGGCGCTGACCCAGCGGGTGGGATGACCCGTTTACTTTATTCGCCGGAATGGCTGGAAACCCAGCAGCA
GTTTAAAAAAGAATGGCAGCAAGCGGGCTGGAAACACGTTTCGATGAAGTGGGGAATTTATACGGTCGCCTGAGTGGCACCGAATATCCACAGGAAGTGG
TTCTGAGCGGTTCGCATATCGATACCGTGGTTAACGGCGGTAACCTCGACGGGCAATTCGGTGCGCTGGCGGCGTGGCTGGCTATTGACTGGCTGAAAAC
GCAATACGGCGCGCCGTTACGTACGGTCGAAGTGGTGGCGATGGCAGAAGAAGAAGGCAGCCGCTTCCCGTATGTTTTCTGGGGCAGTAAAAATATTTTT
GGGCTGTCGAATCCTGACGACGTGCGGAATATCTGTGATGCCAAAGGAAATAGTTTTGTCGATGCGATGAAGGCTTGCGGATTTACTCTGCCGAACGCCC
CACTAACTCCGCGTCAGGATATTAAAGCCTTTGTCGAACTGCATATCGAACAGGGCTGTGTGCTGGAAAGTAATGGGCAATCAATTGGCGTGGTGAATGC
AATTGTCGGGCAGCGTCGTTATACGGTGACGCTGAATGGCGAATCAAACCATGCAGGCACCACGCCGATGGGTTATCGTCGTGATACGGTTTACGCTTTC
AGTCGCATTTGCCATCAGTCTGTCGAAAAAGCGAAAAAGATGGGCGACCCGCTGGTTCTGACCTTTGGCAAAGTAGAGCCGCGCCCGAATACGGTGAATG
TAGTGCCGGGTAAAACCACGTTCACCATTGATTGTCGTCATACCGACGCTACCGTGCTGCGCGATTTCACCCAACAGTTAGAAAACGACATGCGGGCGAT
TTGCGATGAAATGGATATTGGTATTGATATCGATTTATGGATGGACGAAGAACCCGTGCCGATGAATAAGGAGTTGGTCGCCACCCTGACAGAATTGTGT
GAAAGCGAAAAACTGAATTACCGGGTGATGCACAGTGGTGCCGGGCACGACGCGCAAATTTTCGCGCCTCGCGTGCCGACCTGCATGATTTTCATTCCCA
GCATCAACGGGATCAGCCATAACCCGGCGGAACGCACCAATATTACCGACCTTGCCGAAGGGGTCAAAACGTTGGCACTCATGCTTTATCAACTTGCCTG
GCAGAAATAAGGAGTTATAAATGGGATATTTAAATAACGTCACCGGTTACCGCGATGATTTACTGGCTAACCGTGCGATTGTGAAACACGGTAATTTCGC
ACTGTTAACACCAGACGGTCTGGTAAAAAATATTATTCCGGGCTTTGAAAATTGTGACGCGACAATCCTCTCCACGCCAAAGCTGGGTGCCTCTTTTGTT
GATTATCTGGTCACACTGCATCAAAACGGCGGCAACCAACAGGGCTTCGGTGGCGAAGGCATTGAAACGTTCCTGTATGTGATCTCTGGAAATATCACTG
CCAAAGCCGAAGGGAAAACATTTACCTTAAGTGAAGGTGGCTATCTTTATTGCCCGCCAGGCTCCTTAATGACGTTTGTTAACGCCCAGGCCGAAGACAG
CCAAATCTTTTTATATAAGCGTCGCTATATTCCGGTAGAAGGTCATGCGCCGTGGCTGGTTTCTGGCAATGCCAGCGAACTGGAACGCATTCATTATGAA
GGCATGGACGATGTTATTCTGCTGGATTTTCTGCCCAAAGAGTTAGGTTTTGATATGAACATGCATATCCTCTCTTTTGCGCCAGGTGCCAGCCATGGTT
ATATCGAAACACACGTTCAGGAACACGGTGCCTATATTCTTTCCGGTCAGGGGGTTTATAACCTCGACAATAACTGGATCCCGGTGAAAAAAGGCGATTA
CATCTTTATGGGCGCTTATTCCTTACAGGCCGGTTATGGCGTGGGGCGTGGTGAAGCGTTCAGCTATATTTACTCGAAAGATTGCAACCGCGACGTAGAG
ATTTAAGTCATACCACTCGCCTGATTATTTTTAGCTATGTTGGATTTTGCCACGGTTTATTCCGTGGCTTTTTTTGTAGTCAATTCAGGTAAAAAAAGAT
GCGATATAAATCGCATCCGCTTTAAAGGTAATAGTCAGTTTTTAATTCCCTGACCTATTTTAATGGCGCAGGCAATATTACGCGCGCTGTTGAAGAGATT
GGTTTCACCGCTGGCGAGCACTTCGGCTAAAGGTGCCAGACGAGGCAAAATGCTGAATACCGCGTCAATGCCGTACTGGTGCACCACTTCCACGCCATCA
CCCAATACGCCAGCAATCCCAATCACCGGGACATTAAACTGCTTCGCCACCGATGCCACACCCAGCGGCGCTTTACCGCCTGCCGTTTGCGAGTCGATGC
GCCCTTCCCCGGTGATCACCAGTGCTGCACCCTGCACTGCCTGCGCAAGATTGACCGCATTCAACACAATCTCAATACCCGGTTTAATATCCGCATTGAG
GAATACCGCCGCCGCAATGCCCATACCGCCCGCCGCGCCACCACCCGCCATCTGGCAGACGTTGATTTCAGTTAGCTGTTGTAAAACACGGGCGTAATTT
TGCAGCCCCTGTTCCAGCTCTTCGACCATCTCCGGCGTTGCCCCTTTTTGCGGGCCAAACACCGCCGCCGCGCCGCGTGCCCCTACCAGCGGGTTATCAA
CATCACATGCGACTTCAATATGACAGTTCGCCAGACGCGGATCGCATTCATTCATCTCAATACTTGCCACGCGCGCTAAATTGCCGCCGTTAGCCGCCAG
CGGCTGACCGTCGGCATCAAGGAAACGCACACCGAGCGCCTGCGCCATGCCCATACCGCCGTCGACCGTCGCACTGCCGCCAATGCCGAGAATAATATGG
CGAATGCCGTTATCCAGCGCATGGCGAATTAACTCCCCGTACCAAAACTGGAGGCCAGCAACGGATTACGCTTTTCAGGCGCGACCAGCATCAGGCCACT
TGCTGCCGCCATCTCAATCACTGCCGTTTTCCCGTCGCCGGTAAGGCCATAAAAAGCATTCACTGTTTCGCCCATCGGTCCACAGACTTCAAGCTTCACG
ATGTTACCGTCCGTCGCGGCAACCATCGCCTCCACCGTCCCTTCGCCGCCATCCGCTATCGGCAAACAGATATAGTGCGCATCGGGAAAGAGGGTCGAAA
ACCCGGCTTTAATTGCCTGACAACATTTTTCTGCACTTAAGCTCTCTTTAAAAGAGTCTGGCGCAATGACAATCTTCATTATCAATCCTTTTTCAACAAA
TTATTCGATGCGTTCCCACGGAATAAGATTATCCATAAGAACAGCCAGTAAAATTCCGACCAGTAAGCCGTTACTGAGCAGAGGACGAAGCGTTAATGGA
AGGTCTTGCAGATACACAGGCGGTAATGCCATTAAAAATATGCCGACAAATAACGGCAATGCGAGTCGATAAATATTGCGAGCGGTAAACGTTATTTGCT
GGCTAAACACCAGCGCGGAAAAGAGTAAAGGCAGATAAGAAACCAGCATGACCGCGCTACTCACGGGTAAAGGGATACTGCAAAACAGTCGCGTGAGTGC
CGGAACCAGTGCCACCAGCAGGCAAATAACGCTGCCATAAATAAACGAACGCCGCGTGTAATCGCCAGTCTGGGTTAATAAACCAATGGATGAAACAAAC
GGTGAAAATGGAATTACTGCCAGCGGCACGGTTATCAGTGTCATAAATCCGGTCGCCACAAAGCTGCGACGATAACGCGTATTCCCCGCGCCCTGCTGCG
GATAAAAAACATCCGTGCCCCGAATCGCACCGTAGGTATTGCTGATATTTACCAGACCTGTAATCACCGCCGTCAGAATAATCCCCGGCGACAAAGCACC
GCCACTGCCGAGCGGGAACCACTGCCAGTGCAACTCACCGGAGAGCGAATGCGAAGAAGGAAAGCAAAAGTACCACAACAACCAGCCGGTTATCGTACCG
ACCAGCAGGCCGTAACGGGCAAAACGTTGTGGCAGGAAAATAATCATCGCCAGTACCAGGCACATCACCGCCACCGAGAGCGCGAACGGCGGTAATTGAA
TTTTAAAATTCGGGTCGGCTATGCCAAACGGCAGCCCGAGCATACCTTTGAAAAAGATAGTGGTCAGTTGCGCACCCAGCATCAACATAAACAAGACCAT
CACAGACGGCGTAAATAACCGTGCCAGGCGATGGCCTAATCCGCTAAAACCAATCAACATCGTCAGCACGCCGGAGAGCGCAATCCCCACCGCCAGACTG
GTAGCGATATCGTTGATCGGTGTCCCGCGCGATGCTTCGCCAAGGGTGATAGTCAGGATGGTTCCCCACCACAGGCCGCCCGGCCCCTCCATAATAGCGC
GACGATGACCGCAGAACGCCTGAGCGAAGCAGGCCAGTGCGGTAGCAAGAAAAGCATATTGCGTGAGCGTAAGCAGGCTACTTTGAGGCAACTGAAAAGC
AGAAAGTAGCGTAGGAGGAACCACAACCGTGTTGCAAAAAATAAAGAAAAACCACTGAAATCCTGATAACAGGCTTTCGCGGCCCACTGCAAAATTGAAC
ATAAACACACCTTAACCGGAGAATGCCCGCCACAAGGACGGGCATTGCAGGGCCAGATTACTGCTGATGTTTAAGGATAAATTGACCTTTCGGCGCAACA
GGGAAGCCCTGTTCGATATCGTAAATCACATCACCACGTAAGATGGTTTTCGTGATACGCGCGCCAATAGTACGGCCAACATACGGGCTGACTTTGTGGC
GATATTCCAGATCGTCATTGGTAAGAACATAGCTGCTATTCGGCTGAATGAAGACGAAGTCGGCATCTTTTCCTGGGGCGATACGGCCTTTTTGCTGCAG
ACCGAAAATATCTGCTGCGTTAGTCGCCATTAATTTGCCGAACATTGGCAGAGACATTCCGCGTTTCTGTACCGCTTCATCGAACATCACGTCCATGCAG
CTTTGCAGACCAGCGATACCGCCCCACGCTTTCATGATGTTACCGGCTTTCATTTCCGGCGGGCATGGAGAGTGGTCGGAAACCAGGCAGTCTATTTCAC
CGTTAAACAGTTTTTCCCACATGCCTTTCTGGTTTTCCAGATCGCGGATCGGCGGTGAACACTTCGCCAGAGTACCGATTTCTTCGAACTGATCGGTATC
CAGCACAAAGTAATGCGGGCAGGATTCACAAGTAACATCCTGACCTTCCTGACGTGCACGAGTCACTTCCTCAACACCTTCCGGGCTGCTGACGTGGCAA
ACGTGCAGACGGCAACCAGCGACTTTCGCCAGGTACAGTACGCGGCGAATCGCTTCCACTTCGGTAAATACCGGACGCGAAGCCACATAGTCATGGGCAG
TTACGCGACCTTCACGCTTCGCTTCTTCGCCCAGTGCGTCACAGATCAGCGCGTTTTCGCAGTGCACCAGCACCGGCTGGCCTAGTTCACCCAGCTTCTG
CGCGCCTTTGAAGAATTGCCAGTCATTGACGTCACGGAAGTCGTTGTCGATACCGCGATCGCCACAGGTCGCAACGAAGCATTTGAAACCGACAACACCC
ACTTCATCCAACTCATGCAGACGGTCAATGTTGTAAGACACCAGGCCACCGAGTTGTGCCGCATCGATAGTCAGCTTTCCTTTAGCGGCATCGAACTTCA
GTTCAATTGAGGCGCGGTCAACCGTTGCAGGCAGCTGGTTGAGCGGCATTTCGATCATGGTGGTGATACCACCTTTTGCTGCTGCGCGAGTACCGGTTTC
ATAACCTTCCCAGTGGCTGCGACCCGGTTCAGAAATATGGGTGTGCGCATCAACCATGCCCGGCGAAACCACCAGACCAGACGCATCCATAACGTCTTTT
GCATCGCCCAGATCCTGACCGATAGCAGCAATTTTTCCGTCTTTAACGGCGATATCTACAACGCGAGCTTCGTTTTCTAAAATAACGGTGCCGTTTTTAA
TGATTAAATCAAAAGACATAACAAACTCCTTGTAAAATACAGATTGGTTTTTAACTCAATGTTCAATATCGTGATTAATTAACCTATGGTTTTTTGTTCT
CCTGTTTTTTCTGCTGTTGTACGTTTCTTTAATAAGGCGTAGGCCGCAAAGGCGACGATGACGCCGACAAACCATGAAACACGTGATAACGGTTCCATAA
AGGGAATAAACTTACCGCCAAGAGATAAAATAACGGCCACCAGAGTTACTGAAAACGCGGTGAGGTTAAAACCGTTATCGTAATATTTATAATCGCCAGG
TGCGGTGTACAGTTCATCAAGATTAATTTGCCCACGCATCACCACAAAATAATGCGCCATCATCACACCAATTACCGGACCAAGCATTCCGCCGATAATA
TCGAGGAACAGATAAATACTGTCCTGATTTTCCATTAATTTCCACGGGCAGATCAGCAGGCTGATAATACTGGCAATCAGTACGCCGTTTTTATAGGTCA
GTTTCGTCGGTGCAATGGCGGCAATCTGATAACCAGCCGGAATAATATTACCGGTGGCGTTAGTAGAGATAGTCGTCATCAGAATAACCAGTACCGCAAA
GAACGAGGCGAACAGGCTGTCCCAACGCTGAACAATATCCAGCACGTTCCAGGTGTCAGCGCCGTAATGAATACTGGCTCCGGCAATAATACATACCCCG
GCGACCGCAAACAGAATATAGGCCACAACTAAACCCAGCGTTTGCCCCAACGCCTGCTCACGAAACGAGTGGGCGTTTTGCGTAAAGTCGGATGCGCTCA
CCGCCGGTGCCGCCCAGACCGCAACCACCGCGTTTATCACCACCAGAAACAGGAAGCCACTGTTTTCTGCTTTCTGAATACCGCCCGGAATGTAGTCAAA
GATTGGACCGATCCCGACCAGCGAAATCGCCCAAATCGCCATACCGCCGAAAACGATATAGATGCACGGGTTAAGAATGGCAGTGAATTTATTTAAAACT
TTTCCGCCGCCAAAACCAATACCAACGTTAACCAGCCAGAAGAGTAAAAAAGTAATTAAGCCCGGTAGAGAAAGGCCTAACAGTGTGAAATCGCCACCGA
GAGTCAAAAATCCCGGCCAGATTTTGCCAATCAGAATCAAGCAGGCCAGTGACCCCGCGTAACATTGCAGGCCAAACCACATAATGGCAGCAATACCGCC
TCTTAATAATCCGGGAAACAGTGCACCACGTACGCCGTAAGAAGCACGCAGGATCATGGCAAACGGTACGCCGTATTTACTGCCCGCAGCACCGTTTAAT
ACCATTACCGCGGCAATGAAAAAGGCGCTGAGGATAATTGCCAGCATAATACTAAAGGTAGACAAGCCGAGAATAAAAAAGCCGCCAACCATCACATAAT
TGGGAACGTTATGAACCGAACCCATCCATAAGGTAAAATAGTTAAATGTTTTCCAGGTCCGCTGACTTTGCGTTTTCGGCAGTAGATCTTCGCTATAGCC
GCGTTGCTGGAATAATTTTCTCTGATGTTCCATAAATCCCTCTTAATTTCACGTATCGAATAACGTTGTTTTAATCTAGCTATGAGGAACAAATAAAATA
AAAATATTATTTTTAATACTGAAGCAACATCTTTGGCTGCTTTCTTTTTTAATATTGCTGGCCGATTCATTTTCTGATATCGGCCATTTTTATTGCGGGT
ATCAGGCCAGTTTATGGTTAGCCATTAATTCCAGCGCCTGCACTAACGCAGAGTGATCCAACTGGCTGCCACCGTTTGCCGCACATGTATTAAACAATTC
CTGGCAGGTCGCGGTGTTTGGCAGGTTCAGCGCCAGTGCTTTCGCACTTTGCAGTGCCAGGTTGAGATCTTTCTGGTGCAGCGCAATTTTGAAACCTGGA
TTAAAGGTGCGTTTAATCATGCGCTCACCGTGAACTTCCAGAATACGTGAGGAAGCAAAGCCGCCCATCAGCGCCTGGCGCACACGTACCGGGTCCGCAC
CGGCTTTTGAAGCAAACAACAAGGCTTCAGAAACCGCTTCAATATTGAGCGCCACGATAATCTGATTTGCCACTTTGCAGGTTTGACCGTCGCCGTTACC
GCCCACGAGAGTGATATTTTTACCGAGCAGTTCAAACAGCGGTTTTACACGTTCAAATACTGCTTCATCACCGCCAACCATAATCGATAACGTCCCTTCA
CGCGCGCCGATTTCACCGCCGGAGACTGGCGCATCGAGATAATCGCCGCCCAGTTCATTCACCTGACGAGCGAAACGTTTAGTTTCAATCGGGGAAATGG
AGCTCATATCAACAATGGTTTTGCCCTTCAGCGAGGCTTTGGTACAACCATTTTCACCAAACAGAACGTCTTCAACCTGTGGCGTATCCGGCACCATAAT
AAAAATGATGTCCGATGCTTCCGTTACCTGGCGCGCAGTTTCAACACTAACGGCGCCCAGTGACAGTAATTCATCAGCAACCGGACCAATGGTTGTGACA
TGCAGTTGATGACCGGCACGTGCCAGATTAATGGCCATCGGTGTACCCATAATGCCTAAGCCAATAAATCCCAGTTTCATAATTAACCTCTTTTAAATTT
CGCTTTTCCTGAATTCAGACAACACGATCCCCTGCCAACTTAGCGGCCTAAAAAAGCATTGTCTGAATAGCGTTACGTTTTAACGGTACGGATCCATCCA
GCCTAAACCAGCTTCCGTGGTGGTTTGGGGTTTATATTCACAGCCAACCCAACCGTTGTAGTCAGAATTTTCAATTACCGTAAAGAGATATTCGTAATTA
ATTTCTCCGGTTCCCGGTTCGCCGCGATGCGGATTATCAGCAATTTGCAGGTGACCAATTTTATCGGCCCACTGAGTCATGGTATTAGTTAATTCACCTT
CCATCCGCTGCATGTGATAAATGTCATACTGAATTTTCAAATTGCAGCAACCAACATCGTCAATCAGTTTCAGTGCCTGCCGGGTTCCGGTGAGATGGAA
ACCAGGAATATCAAAATGGTTAATAGGTTCAATCAGTAATAAAATATCTTCTTTCATCAGCATATTTGCGGCATAACGCAGGTTTTCTACAAGCGTTGTG
TGAATCTGTTCACTGCTGAAACCAGTCGGCGTTTTACCGACCAGACAGTTAATTTTTTTATTACCCAGAGCACGAGCATAACGAATCGCTGCTGCTACGC
CATCCCGAAACTCTTCTTCACGGCCAGGAATACAGGCAATACCCCGCTCGCCCGCCGCCCAGTCACCTGCCGGTAAATTGTGCAGCGTATGTTCGAGTTT
ATTACTCGCCAGCACCTGTTTTAATTCTTCAATGTCGTAGTCATAAGGGAACATAAATTCAACGCCGCGAAAACCACACTGCGCAGCTTTCTCAAAACGG
GCGAGAAAATCATATTCACCAAATAACATCGATAAATTAGCAGAGAAACGTAACATTATTTATCTCCCTTATTCATAGTGCATGAAACAGGTTTCAGTCG
GTGCGTCCGCGGCGTTATCGGCGATATCTTCAAATTCCATGACGTTATCCAGTTCACTGCCCATCGAAATATTGGTCACACGCTCGAGAATAACTTCCAC
GACTACCGGTACCCGATATTGCGCCATTAAGATTTTCGCCTGTTCAAAGGCTGGTGCAATATCTTCCGGTTTGAAAACGCGAATTGCTTTACAACCTAAA
CCTTCCGCTACTTTTACGTGGTCGACGCCATAACCGTTCACTTCGCTGGAGTTAATATTTTCGAACGCGAGCTGTACGCAGTAATCCATATCAAAGGCAC
GTTGCGACTGGCGAATCAGACCCAGATAGGCGTTATTGACCAGTACATGGATGTACGGAATGTTGAACTGTGCGCCAACGGCTAATTCTTCAATCAGGAA
CTGGAAGTCGAAGTCACCGGAAATCGCCACCACATTGCGCTCTGGATCAGCGGCACAAACCCCCAGCGCCGCCGGAATCGTCCAGCCCAGCGGGCCTGCC
TGCCCACAGTTGATCCAGTGGCGGTCTTTAAAGACATGCAGCATTTGTGCCGCAGCGATTTGTGACAGGCCAATGGTGGTGACATAACAAACATCGCGGC
CAAAAGCTTTGTTCATCTCTTCATACACGCGCTGCGGTTTCACCGGCACGTTGTCGAAGTGGGTTTTGCGCAGCAAAGTGCGTTTGCGCTGCTGGCAGTC
GGCGACCCACTCTTTACGACACGGCAGACGACCCGCTTTTTGCATCTCCTGCGCCACTTCAACCAGCAGTGTCAGCGCCGCTTTAGCATCAGAGACAATG
CCGAGATCCGGACACAGCACGCGGCCAATTTGCGTCGGCTCAATATCGATATGAACGATTTTGCGCCCTTCGGTGTATTTCTCTACCGAACCGGTATGAC
GGTTGGCGAAACGGTTACCGATACCAAACACCATATCGGACGCCAGCAACGTTGCGTTACCGTAACGATGCGCGGTTTGCAGACCCACCATCCCGGCCAT
CAGTTCATGATCGTCCGGGATACAGCCCCAGCCCATCAGCGTTGGGATCACCGGAACGCTGGTCAGTTCAGCAAACTGTTGTAACAGTGCAGCTGCGTCA
GCATTGATTACCCCGCCTCCGGCAACAATCACCGGACGTTCGGCCTGGATTAACATTTTTACAGCTTTTTCGATCTGCATACGGCTGGCAGCAGGTTTGT
AGACCGGCAGCGGTTCGTACATATCAGGATCAAACTCGATTTCCGCAACCTGTACGTCGAACGGTAAATCCACCAGTACCGGACCCGGGCGACCAGAACG
CATCAGGTGAAACGCCTGTTGCAGCACACGAGGCACCAGCGCCGCTTCACGAACTGTAACCGCCATTTTGCTGACCGGTTTAGCAATTGCTTCAATATCA
ACGGCCTGGAAATCTTCTTTATGCAAACGGGCGCGCGGGGCCTGGCCGGTAATACACAGAATAGGAATGGAATCAGCAGAAGCGGAATAGAGCGCGGTGA
TCATGTCCGTGCCCGCAGGACCGGAAGTCCCCAGACATACGCCGATATTCCCTGCCGTTGCGCGGGTATAACCTTCCGCCATGTGCGAAGCGCCTTCCAC
ATGACGCGCCAGAATGTGACGAATACCGCCGTGCTTACGCATCGCTGAGTAGAACGGATTGATTGCAGCTCCCGGAACGCCGAAGGCGGTGGTGATACCT
TCTTTCTCCAGCACATACATTGCCGCGTCAACGGCTCTCATTTTTGCCATTTTATTCCTACCTCTATTAATTGGAAAAATTTTCCAACTCTCAAATTTTG
TCAAAAAAACCCGCTCCGCAGAGCGGGATACGACAGACACTATGGATGTGCTTTCAGTCCCAACGCCGTGCTGATATCACGGGCGGTGTCTCTGACCAGC
TCACCCTGACTGACAAAACGATCTTCTGTCAGTCTTGATGAAGGGCCGGAGATGGAGATAGCGGCAACAACACTACCTACATCATCGTAAATTGCTGAAG
CTATGCAATTCAGGCCGACAACATGCTCTTCTTTATCTACGGTATAGCCCAGTTCACGCGCTTGTTCCAGGTCCTTCAGCAAGGTGGGCATATCCACAAG
CGTCGTTGGCGTAAACTGCTGCAAACCGGTTTGCAGAATGATGCTCATCAACTCTTCTTCCGCCAGCGGATAAAGCAGCGCCTTGCCCGCACCGGAAGCA
TGCAGCGGCAGACGACTGCCCAGCGGCGCACACATTCTGACCATCGATTTACACTCTAACTGACCAATTAATACCGCTTCATTGCCGTTACGGATCGCGA
CATTGACCGTTTCGCCGGAAAGTAACATCAGGCGGCGCATAAACGGCCCGGCGACGGAGAGGACATCGCGGTTATGGATGTACGCTGCACCGACGTTAAA
GACACCTAATCCTATATGCCACCAGCCTAACTGACTGTCCTGATAGACAAAATCCGCTGCCTGTAAAACCTTCAGCAAGCGAAAGGTCGTGGAGAGCGGC
AAATCCAGATTGAGAGAGATATCGCTAACCGACGAACTTCCCCCACTTTTTTCCAGATATTGCAGAATCGCAATTCCCCGCTCTAACGCCTGTGCACCCT
TCTGTGCCACAGGCTCCGCCTGTCCTGGCCTGCCGCGCCGTCTAACTTCCGTCATACCTACGTTAACTCCGACCTACAAATGAGCATAAACAATGAACAA
TTCGTTTATCTTATGCAAGTCGGTTGCAGGCGTCACGCAAAACAGAGTTCCTGTTCAGGAATACTTTCAACATCACAGTTGTCACTGCCGCCGCGATCGA
TGGTCAGAAAATCGGTGACGCGCTGCCAGGCGAAAAGTGGGTGATGCCAGACGTTACGATGGTAATTCACTCCCTGTTCGCCATTGGTAATAAACGCCCG
CAGGGTTGACAGGTCTGGTTTGTCGTCACCTAACGCCACGACTACCACAAACACTTCACCTTTCATCGGGATAAAGGCCTGAGTGCCCAGCGGATGACGT
TCGAGTTCGTGAATGGTCAGCGGCAGATTCGCCGGTTGCGCGCGGTTAATGCTGATAAGCGTACGGTCTTGCTCAAGAATCTCAACCAGCGCCAAATCGT
GGTAACGCTCCACCAGTCCATTGTTAATATGGAAAAAATCCCGTTTCTGCGTTTCGATTACGTCGCCATAAGCACTAAAGGCTTCCTGACTTAACGGTAA
TACCTGAAGTTTCATCTTTTTGTCCTTGTAACATAATTCCGTTCAACCACCACCGACCGGTCAGCTTGGTTTCAATAACAGGCAATCTAAAACCTTAAGA
GAACAACATCAACACAAAAGTTGGAATATTTTTCCAAAACTAGATTTAGTCCACAAATTGAACAGGGTTATCATGTAAAAATACTGATAAATCAGAGGAT
AAGAAAATCACGCAACTTGCGGATTTAAAAGGGGATACCTGAAGATGTTCGATCCAGAAACCTTGCGGACTTTCATTGCGGTTGCTGAAACAGGAAGTTT
TTCAAAAGCGGCAGAACGATTATGTAAAACCACGGCGACGATTAGTTATCGCATTAAACTTCTGGAAGAGAATACCGGAGTGGCGCTCTTTTTCCGCACG
ACTCGCAGCGTGACGTTGACAGCGGCTGGCGAGCATCTACTTTGTCAGGCCAGAGACTGGCTGAGCTGGCTGGAAAGTATGCCCAGCGAGCTGCAACAGG
TGAATGATGGCGTGGAACGCCAGGTGAATATTGTCATCAACAACCTGCTCTACAACCCCCAGGCCGTTGCCAGGCTGCTGGCGTGGCTAAATGAACGTTA
CCCGTTTACCCAATTTCACATCTCCCGACAAATCTATATGGGCGTCTGGGACTCGCTATTGTACGAAGGTTTTTCACTGGCTATCGGCGTCACGGGAACC
GAGGCGCTGGCAAATACCTTTAGTCTTGATCCCTTAGGATCGGTGCAATGGCGCTTTGTCATGGCGGCGGATCATCCGCTGGCGAACGTTGAAGAGCCGC
TAACAGAAGCACAGTTGCGGCGCTTTCCGGCGGTCAATATTGAAGACAGCGCCCGCACCTTAACCAAACGCGTCGCCTGGCGATTGCCGGGGCAAAAAGA
GATTATTGTTCCCGATATGGAAACGAAAATCGCCGCCCATCTGGCGGGCGTTGGCATTGGTTTTTTGCCAAAATCACTTTGCCAGTCAATGCTCGATAAT
CAACAACTGGTCAGCCGGGTAATCCCAACGATGCGCCCTCCTTCGCCATTGAGTCTGGCATGGCGCAAATTTGGCAGCGGCAAAGCGGTAGAAGATATTG
TGACCTTGTTTACCCAGCGCAGGCCAGAAATCAGCGGATTTTTAGAAATTTTCGGCAACCCACGCAGTTAAAAATCAAGTTTCCTTGCGCGTTGGCGCGT
AAAATAGCGCGCAAGCTGATTTGAGGTTCACTTTTTACTATGCAAGAGAGACACACGGAACAGGACTATCGTGCCCTGCTGATTGCTGATACGCCCATTA
TTGATGTTCGCGCCCCCATCGAGTTTGAGCAAGGCGCAATGCCCGCCGCTATCAACCTGCCGTTAATGAATAACGATGAACGCGCCGCCGTTGGCATCTG
CTATAAACAGCAAGGGTCAGACGCGGCGCTGGCACAGGGGCATAAACTGGTGGCGGGTGAAATTCGTCAGCAGCGCATGGACGCCTGGCGGGCAGCGTGC
CTGCAAAATCCGCACGGTATTCTCTGCTGCGCCCGTGGCGGTCAGCGCTCACATATTGTGCAACGCTGGTTGCATGACGCGGGGATTGATTATCCGCTGG
TGGAAGGCGGTTATAAGGCACTGCGCCAGACCGCGATTCAGGCAACCATTGAACTGGCACAAAAACCGATAGTGCTGATTGGCGGTTGTACCGGCAGCGG
TAAGACGCTGTTAGTACAACAACAGCCGAACGGTGTTGATCTGGAAGGGCTGGCGCGCCATCGCGGTTCTGCTTTTGGTCGCACGTTACAACCGCAACTT
AGCCAGGCGAGTTTTGAAAACCTGCTGGCTGCCGAAATGCTAAAAACCGACGCCCATCAGGATTTGCGCCTGTGGGTGCTGGAAGATGAAAGCCGGATGA
TCGGTTCGAATCACCTGCCGGAATGTCTGCGCGAACGAATGACTCAGGCGACGATTGCGGTGGTAGAAGATCCGTTTGAGATCCGTCTTGAACGCCTGAA
CGAAGAATATTTCTTGCGTATGCATCATGATTTTACCCACGCTTATGGCGACGAACAGGGCTGGCAGGAGTATTGCGAATACCTGCATCACGGGCTTTCG
GCGATTAAACGTCGGCTGGGACTACAACGCTATAACGAACTGGCTGCAAGGCTGGATGCGGCGCTGACAACGCAACTCACCACCGGCAGCACCGACGGTC
ATCTGGCCTGGCTGGTGCCGTTACTTGAAGAATATTACGACCCGATGTATCGCTATCAGCTTGAGAAAAAAGCGGAAAAAGTTGTCTTTCACGGTGAGTG
GGCGGAAGTGGCGGAATGGGTTAAGACGCAGTGATGGGCGGTATTCTGAAACGGCGATTGTCGTGAGAACAGAATGGTTGCACCAGAATACAGATATAAA
AAAACCGACATGACAGTCGGTTTTTTTATTTTTTCCGCCCAAGACTTGGTGGTTCCGGGCAGAAATGAAACAGTCCTCATCTAGCAAGTGAATTATAAGT
CAGGATGCCTACATATTCAAACAGCTGTATGGGTCCACCACATATTGCAATTTTTATTCTCTTTTAAAATATATTCCACGGGCGTCATTAGTGCGAGCGC
CTTGTGGGGTCTTTTGCTGTTATACAGCACCAGATATTCCGCCAGCTTCTGGTTAAATAGCGCCAGATCTTCAAAGAGTAAAATCTCATTAAATTCAATA
AACTGCTCTCTTAACGTCCGGTTAAAACGTTCACAGATAGCGTTCATTTTTGGCGTGTAGGGATAGGTCCAGAGGTGTTTGATAGCGGCTTCCTGCAGCG
TTTTGTCGAAGTTTCCCAGGAACTCTTTTCCGTTATCTGTGATTATCTGGCTGATACCGACCGGGAACAACCGGGCTGCGCGGCTGAAGAAGTGATTGAC
GATATCACTGTTGAGTGACGGCACAGCCAGCGCCAGCGCGTAATTGCTGCATTCGTCGATCATGGTGATGACATAGCGACGCAGTTCGCCCATTCTGAGC
TCAATGGCGTCCATCCCAATGAGCTCACCTGTCTTTACCGGGCGGTAGTGCTTTGGCCTGCGGGGTTTGGCAGACCGCTTTTTGACAAGCAGTGCCTTCC
CCGCGATCCCAGACGCACAGGTATCATCCGCATTTTATCATGTGCGGCAGCGATCATTCTGCCGATGGTGGAAACACTCGGACAGGCCAGATAGCGCTGT
TCGCACCAGGGCTTCAGGCGAACAAAAATCTGCTCTTTACCGAGGTTCGGCAGCTCTGTCCTGAGGCGTCGAATCTCTTTCAGCACATCGGGATGCCAGT
GTTTTTTTCGTCGCACCAGAGGTGCCTTACTGTGCGGGATTAGCCCCTCAGGTCCTTCCTTGTTCAGTAACTGACGCCACCAGTAAAGCGTGCGGCAGGA
CACGCCAAAGGCTTCAGAAGCTGCAGAAATACCGTGTTTATCCCAGAAGTGCAGAGCCTTCATTCTCATTGTTGCTATATCAGCCATCACTGAAAGCCTC
AACGCATAATCGGCCGTTTGGTAGTACTTAGGATAGCCAACCATCAGATGCTGCATTTGCATAGTGCAATCTCCCCTTACTTATCCGGAGGCAATTGCAA
TATCTCTGTGAACTTACACAACAGCTATGTTGGCGATACAATCCCGACGCTAGTAGTGATACTGCCTCAAGGGATTACCGCAGTGCGGAAAAGTACTTTT
AAGTCCTGGTCAGGATACAGGTGGTGCTGATTCTGGTGCTCTAATTTGGAGAGAGGCAGTCCTCATCTAGCACATGAAGAAAATCATAGTTACAGGCAAC
GTAAGGGTAAGCTGTGATTGTCTTTCTCCCTTAAGGGAGCAACGGATGAAAACTTTTCTCGATAAAGTTCTCATCGTTCTTAAGGCGCTAATCGCGCTGC
TAGAACTGATCCGTCAATTTATTGAATAACTGAGGAAACGTAGCTAAGGCCGAAGGTTTACCACCTTCGGCCTTTAAAAACCGACATGACAGTTGGTTTC
ATATTTATTGCCAAAATGCACACTGTTCATGCCGGATGCGGCGTAAACGCCTTATCCGGCCTACACAATCTTGCAAAATCAATATATTGCACGATCCTCG
TAGGCCTGATAAGCGTAGCGCATCAGGCAATCTAACACCTGTCATCACCCCGCAAACTGCCTGAACAGCGCCTTACCCTTAAGCAGTCGCGCACCCAGCC
AGCCGCCGCAAAGCGACAGCAGTAGCGCACCGCTGCACGGCAGAACAATCCACAATCGCCAGTCTGGCTCCCACGGGAAATCAAACACTTTCGATTGCAG
TACCGCCAGTGCCGTTTCCGCACCAATTGCGGCCACCAGGCCGGATACAAACCCGAGCATGGCGAACTCACACCACAATGTCGTGCGCAGCAGTTTTTCC
CCGCACCAAGTGTGCGCCACACCACCAGCTCCTGATGACGCTGACGCATTCCCACCTGCACCTGCGCCAGCAACAGCAACATGCCGCAGGCGGTGACCAG
CACCACCATCACTTCCAGCGCCCGACTTACCTGCTCCAGCACCTGACCGACCTGTTTTAAAATCGCGCCAATGTCTAACAGGCTAATGGTCGGGAACTGG
CGGTTGAGTTGCGTCAACATGCCGTTGCCATTCTCCCAGCGGAAACTGGTAAGCCAGCTCTGCGGTTGCCCGTCTAATGCCCCTTCCGGGAAAATAAAAT
AGAAATTAGGCCGCAGACTTTCCCAGTCCACTTTGCGCAGGCTGGTCACTTTAGCGCGGAACTCCTGGGTATCGCCCATAAAAGTCACGGTATCGCCGAG
GGCAACGTTTAAGCGTTTCGCCAGCCCCTCTTCCATCGACACTTCATCCGCTTTTGGCGGCCAGTTACCGGCGACGATCGGGTTATGATCAGGCCGCGTA
TTTTGCCAGGTGAGATTCAGCTCGCGGTTGAGCGCCTCATCTCCATTGCCTTCTGTCGGCTTGTCGTTAATCGCCGTCAACCGCGCCCGCACCACCGGAT
AAAACGATTCCGGGACTATTTGATGTTCCGCGAGAAACGCTTTCAGCGGCGTAACCTGTTCCGTAGCGATGTTGATTAAAAGTAGTTCGGGCTTTCTGGC
GGCAGTTGTTGTTGCCAACGGTCGAGCAGATCGCCACGCAACACCAGCAACAGTGCCAGCAGCATAAAGGAGAGCGAAAATGCCGAAAGCTGGCTTAACG
TTGACCACGGCTGACGTAACAGGCGGCTAACCGCCAGGCGCAGAGGTAGCGATTTCAGCGTCATGCGGCGAAGTACATTCAGCAGCATCCAGCCCAGCAC
ACCGCACAGCAAAGCCAGTACTACCGCGCCCGCCAGCACCGCCCAGAGCAGCATACTGCCACCCATTAATCCGGCGAGCAGCAGCACAACCACCACGGTG
ACAATCGGCAGATAAAACTTCAGCGGCCAGACGTTCGCTACCACATCATTACGTAATACGCGTAAAGGCTGCGTTGCCAACAACAGGCGGTATGGTCGTA
GCCCCACCAGCAGCGAAATAACCGTCATGGTGCCGAGCGCCCACAGCCACGGCCAGAGGCTGGCAGGAGGTAAAGCGGCAGGTAGCACGGGCTTGAGCAG
CACCATCAACACGTTTTCGAACAACAGGCCTATCGCCCCACCGGTAACGGCTGAAAGCGCCAGCACCATCAACCACTGACCGACGATTAACTTACGCAGT
TGCGCTCGCCCTGCCCCCAGCGTCTTGAGGATCGCCACCAAGTCGTAGCGACTGCGACAGTAATGATTCATCGCCACCGCAACCGCCGCCACCGCCAGCA
GCAAGGTCAGAAGCGCCGAAAGCAGCAGGAACTGTTGCGAACGTTCTATCGATCGCCCCAGCGCGCCTTCGTCCTGTTCCAGACCGTACCAGCGTTGTTC
AGGTTTAAGCTGGGGTAACAACCATTTCTCATAGCCGTCGAGCTGGTTCTCGCTGCCGCCGAATTTATAGCGCCAGGTGACCCGACTCCCCGGCTGCACG
GCTCCGGTTTTATCGACATCCGCCAGATTCATCATCAGACGCGGAGCCATCTGGAAGGGGTTAAAACCGGAATCCGGTTCCTGAATCACTTCTCCGGCAA
TCCGCAAGGTGGCATCGCCCACGTCAATGGTGTCGCCCGTTTTCAGGTTAAGCAGTGCCATCAGGCGTGGGGCCAGCAATACGCTGCCCGCCTGCGGTTT
CAGGCCAGGGGATTGGTTTGTAGCTCGCCATACATCGGGTAGATATCATCCACCGCTTTGACGTTCGCCAGTTGCGGCGTGTCGCCTGCAAAGGTCATGG
TGGCGAAAGTCAGCTGCTTGCCGACTTTCAGGCCGCGCTTTTGCGCTTCCTCCAGCCATGCTTGCGGCACTTCGCGCGAACTGCGCAACGCCCGATCGCC
CGCCATAAACTCCCGGCTTTGCTGGCTTAAGCCCTTCTCCATGCGATCGCTGATATTGCCCAGCGCCAGCACGCAGGCCACCGCCAGGCTTAGCGCCAGC
CAGACAATTAATAGCGACGGCGAACGCCATTCGCGCCAGAACCAACGTGCAATCATACTTCCTCCTGCAACTGCCCGTTCACCAGCCGTAAGCAGCGGTC
GCAGCGTGCCGCCAGTTGCAGGTCGTGGGTCACCATAATCAACGTGGTGCCATGCTCACGGTTGAGGGAAAACAGCAGGTCGGCAATTTTATCGCCGGTC
TGGCGGTCAAGGTTGCCGGTGGGCTCGTCGGCAAACAGCACATCAGGTCGACCATTAAAGGCTCGCGCCAGCGCCACTCGTTGCTGTTCGCCGCCAGAAA
GCTGTGCCGGAAGATGATCAAGACGTTTACCCAGCCCTAACTGTTCGAGCAACGCTTTCGCCCCGTTACGACTTTCTGCGCTACTCTCACCGCGCAGCAG
CGCCGGAAGCTCGACGTTTTCCAGCGCGTTAAGGGTAGGAATTAACATAAATGACTGAAAAACAAAGCCTACGTGCTTCGCGCGCAACTTTGCCCGCGCT
TCTTCGTCCATATTATGTAGCGGTTGTCCCACCAGACTCACTTCGCCACTGCTGCCGTCATCCAGCCCTGCGAGGATCGCCAGCAAGGTTGACTTACCCG
ATCCCGACTCGCCCACCAGTGCAATGGTCTCACCACGTTTGACAACCAGCTCAACTCCGGTGAGGATGGAGAGTTCATGCTCCCCCTGACCGACGGACTT
CTTAAGATGATGAACTTCAACAATGTTTTCCGCTGGCATTTGCCCTTCCTGTTCCTGGTCCTGTTAACCTTCCGTGCCGCCGCAGCGGACACGTTATTGA
TTCTGGGTGATAGCCTGAGCGCCGGGTATCGAATGTCTGCCAGCGCGGCCTGGCCTGCCTTGTTGAATGATAAGTGGCAGAGTAAAACGTCGGTAATCAA
TGCCAGCATCAGCGGCGACACCTCGCAACAAGGGCTGGCGCGCCTTCCGGCTCTGCTGAAACAGCATCAGCCGCGCTGGGTGCTGGTTGAACTGGGCGGC
AATGACGGTTTGCGTGGTTTTCAGCCACAGCAAACCGAGCAAACGCTGCGCCAGATTTTGCAGGATGTCAAAGCCGCCAACGCTGAACCATTGTTAATGC
AAATACGTCTGCCTGCAAACTATGGTCGCCGTTATAATGAAGCCTTTAGCGCCATTTACCCCAAACTCGCCAAAGAGTTTGATGTTCCGCTGCTGCCCTT
TTTTATGGAAGAGGTCTACCTCAAGCCACAATGGATGCAGGATGACGGTATTCATCCCAACCGCGACGCCCAGCCGTTTATTGCCGACTGGATGGCGAAG
CAGTTGCAGCCTTTAGTAAATCATGACTCATAAAGCAACGGAGATCCTGACAGGTAAAGTTATGCAAAAATCGGTCTTAATTACCGGATGTTCCAGTGGT
ATTGGCCTGGAAAGCGCGCTCGAATTAAAACGCCAGGGTTTTCATGTGCTGGCAGGTTGCCGGAAACCGGATGATGTTGAGCGCATGAACAGCATGGGAT
TTACCGGCGTGTTGATCGATCTGGATTCACCAGAAAGTGTTGATCGCGCAGCCGACGAAGTGATCGCCCTGACCGATAATTGTCTGTATGGGATCTATAA
CAATGCCGGATTCGGCATGTATGGCCCCCTTTCCACCATCAGCCGTGCGCAGATGGAACAGCAGTTTTCCGCCAACTTTTTCGGCGCACACCAGCTCACC
ATGCGCCTGTTACCCGCGATGTTGCCGCACGGTGAAGGGCGTATTGTGATGACCTCATCGGTGATGGGATTAATCTCCACACCGGGTCGTGGCGCTTACG
CGGCCAGTAAATATGCGCTGGAGGCGTGGTCAGACGCACTGCGCATGGAGCTGCGCCACAGCGGAATTAAAGTCAGCCTGATCGAACCTGGTCCCATTCG
TACTCGCTTCACCGACAACGTCAATCAGACGCAAAGTGATAAACCAGTCGAAAATCCTGGCATCGCCGCCCGCTTTACGTTGGGACCGGAAGCGGTGGTC
GACAAAGTGCGCCATGCTTTTATTAGCGAGAAGCCGAAGATGCGCTATCCGGTGACGCTGGTGACCTGGGCGGTAATGGTGCTTAAGCGCCTGCTGCCGG
GGCGCGTGATGGACAAAATATTGCAGGGGTGAGTTGAAGCGCGCGCTTAAGCCCCCATGTCAAAGAAAATATCGACAACAGAGAGCGACTCCATGTCCGT
AGAAAATATTGTCAACATTAACGAATCTAACCTGCAACAGGTTCTTGAACAGTCGATGACCACTCCGGTGCTGTTCTATTTTTGGTCTGAACGTAGCCAG
CACTGTTTGCAGTTAACCCCAATTCTGGAAAGCCTCGCGGCGCAGTACAACGGGCAATTTATTCTGGCGAAGCTGGACTGCGACGCGGAGCAGATGATTG
CCGCCCAGTTTGGTCTGCGCGCGATTCCGACCGTATATCTGTTCCAGAACGGGCAACCAGTAGACGGCTTCCAGGGGCCGCAACCGGAAGAGGCGATCCG
TGCCCTGCTGGATAAAGTGCTGCCGCGCGAAGAAGAGCTGAAAGCGCAGCAGGCGATGCAGCTGATGCAGGAAGGCAATTACACCGACGCCTTGCCATTG
CTGAAAGACGCCTGGCAGTTGTCGAATCAGAACGGGGAGATCGGCCTGCTGTTGGCAGAAACGCTGATTGCGCTGAACCGTTCTGAAGATGCAGAAGCGG
TGCTTAAAACCATTCCATTGCAGGATCAGGACACCCGCTACCAGGGACTGGTGGCGCAAATCGAACTGCTGAAGCAGGCGGCAGATACGCCGGAAATTCA
ACAGTTGCAACAGCAGGTGGCAGAGAATCCAGAAGATGCCGCACTGGCAACGCAACTGGCACTGCAACTGCACCAGGTTGGGCGCAATGAAGAGGCGCTG
GAGTTACTGTTTGGGCATCTGCGTAAAGATCTCACCGCCGCAGACGGTCAGACACGTAAAACGTTCCAGGAGATCCTTGCTGCGCTGGGTACGGGTGATG
CACTGGCGTCGAAGTATCGCCGCCAGCTGTATGCGTTGTTGTATTGATGTTTTGTTGATCGGCACATGAACCACAACGCCGGATGCGATGCTGCGCATCC
GGCATCGCATCATTTCTTCTTCAATTGCGTCACCACCAACTGGTGGCGCGAATTATAAAATTTACGATAGGTTAAATAGCAGGCAATAATGGTAGACAGG
CTGGCAGTTGAGAGCAGCATAAAGGTCACCATAATCTGATATTTAATCGCCTTCACCGGATCAATCCCGGCAAATATCAGCCCGGACATCATTCCTGGTA
AACTCACTAAGCCAACCGTTTTTGCTGAATCGACCGTCGGAATTAAAGCCGCGCGAATACTGTCGCGAATCAATATCGCTGAAGCCTGTTTTGGTGTCGC
GCCAAGACTCAGTTTCTCCTGAATCTGTTGCTGTTCGCTAATGACCCGTTGCCCTAAATTGTTGTAACACACCCCCACCGCTACCATGGCGTTACCGGCT
ATCATCCCGGCGATAGGGATCACCTGCATCGGGATAAATTCAATCGACCCAGAGAGGATCAGTACCGCCAGGGTAATTCCCGCTCCGACCGTAATGGCAA
TAAACGATGAGATAAAAGCTTTAGCAATATATTTACTGCGTTTTTGCGCGTTCCACGCCGCATTAAAGCAGATAAATAACACCATCAATAATGTCAGACA
GGCATCATCCACGCTGAAAATATACTTCAGCACATAGCCGACAATAATCAGCTGGATTATCGCGCGCCCGACACTCCAGAGAATATCTTTCTCCAGCGCT
AGTTTTTCTTTATGGCTAATTAAGATTGCCACCACCACCAGCATTAATGCCAGTGCTAATGATTCGTTAGTAATATTATGCGAGTTCATAGCGTGCTTCC
TGCATTTCTCCGGCATGCGGTTGCAGTGTAATCACCTTATCCGCATGATTAATTTCGTCTTTATCGTGTGTCACCCACAGCACGGCAATATTTTGCTCGC
GCACATAACGGTGGATCATCTCATTAACGTTATGTTTATTACTTTCATCCAGCGCACTGGTGATTTCGTCGAGCAATAAAACCTTCGGCATAAATTGCAG
GTTACGAATCAATGAGATGCGTTGTTTTTCACCACCAGATAGCTCGGCGATATTCTTCGTCAAAATGCTGTCCGGTAAAGCGAAGCGTTCAAGAAAATCG
AGAAAAATGGCCGGGTCAGGCTGCTGGTTACGGATCTGCCAGGGAAAAATCAGGTTATCGTATACCGTATCGCCAAACAGCGTCGGCGTCTGGGCGCAGT
AAGAGACTTGCTGGCGGTAGATTTCTGGCTTTAGTGTGCTGACATCCTCACCTTCAAACAGTAACGTTCCGCTGGTTGGGCTGATCAATGAAGCAACTAT
TTTTAGCAGTGTACTTTTGCCACAACCAGAAGGACCGGTAATTAACTTAAATTCGCCAGCACGCAGCGAAAAATTGATGTTATTAAGAATCTTCGTATCA
CCCGCCAGATATCCTACGTTTTGTAGCTGAAGCAAAGGACTATTTTCCTGCATCGCTGTTCCCTTTTTCTGATTTTTACTAAAAACAGTTTATCCTTCGC
AGGAATAAGGGGGAACTCTCTTTCAGTAATCAGGTATAATTTGTTTAATCAAGCAGCAATTTTGCTGATTATGGACGGTACAACAGGAGGTTTTTCCGAT
GATTATCTTTATCCCGATTCTCATTTTTGTCGCGCTGGTCATTGTCGGCGCGGGCGTCAAAATCGTGCCGCAGGGCTATCAATGGACGGTAGAACGCTTT
GGTCGCTATACCAAAACGTTACAGCCAGGTCTAAGCCTGGTGGTGCCCTTTATGGATCGCATTGGTCGCAAGATCAATATGATGGAGCAAGTGCTCGACA
TCCCTTCCCAGGAAGTTATCTCGAAAGATAACGCCAACGTTACCATCGACGCCGTGTGCTTTATTCAGGTAATTGACGCGCCGCGCGCGGCTTATGAAGT
CAGCAATCTGGAGCTGGCAATCATCAATCTGACTATGACTAACATCCGTACCGTGCTGGGTTCAATGGAACTTGATGAAATGCTCTCTCAGCGCGACAGC
ATTAACTCGCGTCTGCTGCATATTGTCGATGAGGCCACCAACCCGTGGGGGATTAAAGTCACCCGTATTGAAATTCGTGATGTGCGCCCGCCCGCAGAGC
TTATCTCTTCAATGAACGCGCAGATGAAAGCGGAACGTACCAAACGCGCTTACATCCTTGAAGCGGAAGGGATCCGTCAGGCGGAAATCCTCAAAGCCGA
AGGTGAAAAACAGTCACAAATCCTGAAAGCGGAAGGCGAACGTCAGTCGGCGTTTTTACAGGCTGAAGCGCGTGAACGTTCCGCTGAAGCAGAAGCCCGC
GCCACCAAAATGGTGTCTGAAGCCATCGCCTCCGGCGATATTCAGGCGGTGAACTACTTCGTCGCACAGAAATACACCGAAGCGTTACAGCAGATCGGTT
CGTCCAGTAACAGCAAAGTGGTGATGATGCCATTAGAGGCCAGCAGCCTGATGGGGTCGATTGCCGGGATTGCTGAGCTGGTGAAAGACAGCGCCAACAA
ACGGACTCAGCCATGATGGAGTTAATGGTCGTCCATCAACATATTTTCTGGCTAAGTCTCGGCGGTTTGCTGCTGGCAGCCGAGATGTTGGGCGGCAATG
GTTATCTGTTGTGGAGCGGCGTGGCAGCGGTGATTACCGGTCTGGTGGTCTGGTTGCTGCCGCTGGGTTGGGAGTGGCAAGGGGTAATGTTTGCCGTCCT
GACGCTGCTCGCCGCCTGGCTGTGGTGGAAATGGTTGTCGCGGCGGGTGCGCGAACAAAAGCACAGCGACAGTCATTTAAACCAGCGCGGGCAGCAGTTG
ATTGGCCAACGTTTTGTTCTGGAATCTCCGCTGGTCAACGGGCGCGGTCATATGCGCGTCGGTGACAGTTCATGGCCTGTCAGCGCCAGCGAGGATCTCG
GCGCTGGTACGCATGTTGAGGTGATTGCGATAGAAGGAATAACGCTGATTATCCGTGCGGTCATCGCCTGATGCGACGCTGGCGCGTCTTATCATGCCTA
CAAAATATGCCCGAATCGTAGGCCAGATAAGGCGCTTGCGCCGCATCCGGCATATAGCCGAGTAGAGGCAAAATTACTCTTCCCGGCCTTTACCCATACT
TTTTTGGTCTTCATCCGGATAATGTTTTTTTAGATATTCCAGGACGTTTTTATTGACCTTGTGTTGGGTATACACCCACCCTTTCCAGTAATCAGGCTGG
TCCAGGTAAACTTCTGGCGGAATGGTGAAATCAGAAAGCGTTAACCATTCGGCTAATAGATCGGGGTTTCGTTTCTGGATTAACTGCAACAGCATAATCA
GTGACATAGCTGAGGCAGGAGCCGTACTATCGCCGCTTAAATACTTCCACACTGTTGACCGGTTCGAACGAAAAAGGATCGGTAGCAATGCCCGGTCCAG
ATTCATTTCATTAAAAATCTTCTCAAATTCATTCATTTAAATGTTCCTGCCTGGCGTAAACCTCTTAAAAATTGAGATTTATCAAAGAAACGCATTTTAG
CACACATCAGGAACCGGTTCACGTTTAGTCCAGAAACAGAATTTATTTCGCTTATCAAAACAAGTCTTTACTCTTTTTTACATTGAAAGAGCACGAAATG
TTTTCCTTTTTAATTTATAAAAGAAACATTTTTTGTTTCTTATTGGTGATATTTACGCTTACAACAGACAAAAATGCGCTTTACATCACACAAATGGCGG
CGTAGATTTCGATCATATTGCAACGTATTTTATTTCTTAATAACAATATTATTTGTTTCTTATAGAAACATTAATGCAACTTATTTTGATCGAGAGAAAA
TGAATGAAAACTGTAAACGTAGCTTTACTGGCACTCATAATTTCAGCAACATCCAGCCCTTTTGTTTTAGCTGGTGATACCATTGAAGCGGCGGCAACAG
AGCTTTCAGCCATTAACTCGGGCATGTCGCAATCGGAGATTGAGCAGAAGATTACCCGCTTTTTAGAACGCACCGACAACAGCCCCGCTGCATATACCTA
TTTGACTGAACATCACTACATCCCTTCTGAAACACCTGATACCACTCAGACTCCCCCTGTCCAGACAGATCCTGACGCAGGACAAAAAACCGTTGCCGCT
ACAGGTGATGTACAGACAACCGCCCGTTATCAGAGCATGATCAACGCCCGACAGTCTACGGTAACTGATGCCCAGCAAACGCAAATTACAGAGCAACAGG
CGCAGATCGTAGCCACACAAAAAACGCTCGCCGCGACTGGAGATACGCAAAATACCGCGCATTATCAGGAGATGATTAATGCCAGGCTGGCGGCTCAAAA
TGAGGCTAATCAGCGCACTACCACGGAACAAGGGCAGAAAATGAATGCACTGACAACCGATGTGGCAGCACAACAGCAAAAAGAAAGGGCTCAATACGAT
AAACAAATGCAAAGTCTGGCGCAGAAGTCTGTCCAGGCACATGAGCAAATTGAAAGTCTGAGACAAGATTCCGCACAAACGCAGCAACAGTTAACCAACA
CCCAAAAACGGGTTGCAGATAACAGCCAGCAAATTAACACGCTCAATAACCATTTCAGTTCGCTAAAAACGAAGTTGAGGACAATCGTAAAGAAGCCAAT
GCGGGAACTGCATCTGCCATCGCTATCGCCTCACAACCACAGGTGAAAACCGGTGACTTGATGATGGTCTCAGCGGGAGCGGGAACCTTTAACGGTGAAT
CTGCGGTGTCTGTCGGAACATCTTTTAATGCCGGAACGCATACGGTACTTAAAGCAGGTATTTCTGCGGATACACAATCTGATTTCGGTGCGGGTGTCGG
CGTGGGATATTCGTTCTAATTTTAACAGCAATTTCTTATTCGCAATTTTCCGCACATTATTTAAGGTTAACAATGATGAATAGCTCCATTAAATCGTTTT
CCCTGCTGGCGGTTATATTACTGGCTGGCTGTAGTTCACCCACTTCCCGCATCGCAGATTGCCAGGCGCAGGGCGTCAGCCATGACACCTGTTACCTCGC
AGAACAACAGCGTCAGACGGCTATTTTAAGTGCATCCGAGGCGCAGGCATTTAAAAATGCAGAAGCCGCACAACATGCCCAGGCGGCAAAGAAAGCCATT
TATAAAGGATTTGGCATGACCTTTAGAATGAGCAGTAAGAACTTTGCTTATCTCAATGATTCATTATGTGTAATTGATGAAGACAATAAAGATGCTACTG
TTTATCAGTCGGGTCTGTATAATGTCATTGTTTATCATCACACAGGAAAAGTCGCCTTAATGAAAGAAGGCCAGTTTGTGGGTTATTTAAAATGAAGGAG
CAAAGGAAAATCCCCCTGACGCATATTATGATTATCGGTGCGTTTATTTTTGCCTTCTTGCAAGTGGTGTTATTAGCCTCCCTGGTTCACGCTGTGAATG
TTAACAACGAAATCCAGGAAGGCTTATTTCAGTCGGGGCGCATAATGGTAGAAAGTTTGCAGCATATTCTTTCGGTGCAAACGGGGATTAATGGGTAAGG
ACACCGTTTCCATTTCCAGAGCAATAGTCACCAGCGTAATTTTCTGGCACAGTTCAGGGAACTGAAATTTTGGCTAAGGAGTGGCCATGCTTTTTCCCCT
TTCGAAAACCTGAAGTACGTCTGCTGAAAAATACCGCTGCGGGCGTCATTTTTTCGGTGAAGTCCGGGAAAGGATTTCTGCGTCAATGTGTGATTTACGA
TCCGCACTCGCACGGTCTTATCCATTCGCTCTGCTGGCAAGGATGTCCCGTTAATACGTTTCTGGTCCGAGGCTGATTGCCCTACCTGTGCGGAATTTGT
CTACAGCGGTTTTGCGGAGGATGAACAGGGAGCCGCCCGGTTTTTGTCTGCTCTCGAAAACTGGAATCGCCCGCGCTCTGGCCTGGTATCTCCCTGATTC
CTATCTCTGCGTTCTGCTCGACGGACACCATAAGGCTACTGCCGCCGCGCTGGAAGGGCGACCGCTCAAAACACTGGTGCTCAGCACGGCAACCCATTTT
AATGATGAGCAACAAACCCTGGTATTTCCTGGCGGGGAATGTCTGCACAAAACAGAGCTGCAATACCACATACCAAAACTCACCGCGTGCAAAACATTAC
CGCCCAACGCATGGGAGAGTTTCGGCCCTGATAAGCACATCAGCCCATCCGAAACCTGGTCAGGCCCCCTCACCTTCCGGTTGATGGCGCAAAACCGAAC
GCCGCAAGCAGATGCTTTTTTCTGGATTTTGCCATCAATGATGACGGGGAACGTCCGGAGCTGACGAAAATAATGGACGACTATTTTCGCAAGCCTTAAT
CACCCCGCCCGATGATGACAGCAGCCGGAGAGATTTTCGATAATCGGGCAGTCGGCGCTGTCATCACCGGGACAGGCATTCGCCAGCGCCAGCAGCTGGT
TACGCATGGATTGCAGTTCTTCGATATGCTGTTCGATCTCCGCTACTTTCTCCAGCGTACGACGTTTGACGTCGGCGCTGTGACGCTGCGGATCGTTAAA
CAGATTCACCAGTTCGCCGCTCTCCTCCAGGTTAAAGCCCACCTGGCGTGCCTGGCGCAGTAAGGTCAGTTCGTTGAGATGCTGCTGCGTGTAGGTGCGA
TAACCGTTTTCGCTGCGCATCGGCGGCGTCACCAGCCCCTTCTCTTCATAGAAGCGAATGGCTTTGCTGGTCAGGCCGGTAATTTTTGCTACATCGCTAA
TGTTCATCGTTCGCGCAACGCCTCCTGTGCTTTGTTAAAGGGTTTCAACAAATATTCAAGCACGTTTTTTTGCCAGTGCGAATATCGACCGCCACCACAA
TAATACAGGAAGTACTGCGCACAGAGAGATGTTATACGGTTTTATTGCGCTTCATGACCATTGCCACAATAAGGCTGAGTAAGAGTGCGCCAATAATCCA
TATCAGCGCACGGCTGCCCTGGGACCAGAGACTGTAGATAAAGCCAACGATCACCAACAACATCACCAACGTACCTACGATAAGAATCGGCAACGAGGCG
TGAATATCATGACGCAGGCGGATCGCCACCACAAACACCGCCAGATAGCAAATCAAAAAGGTGGCGCTGGCAACGCTGGCGAGTGAGCCTAAATTCAGCG
CCGCCGTCATCAGCATAATCAACACCACGACAATGATGTTGCCCCAGGTACTCTGCCGCCACAGGGATTTATTCATTAGCTTCGGCAGTTCGCGTTCGCT
GCCCATGTTGTCCATGATGTTAAACACGGCGAACAGGTTCGCGTTGATGGCTGAAGCCGTCGCCAGTAAAGCGCCGATGACGACGATCACATAACCCACA
TGCCCGAGCAGCGGAGAAGCAGCCTGCGCTACGGCGGTATCGGCATATTTTTCTAACTCTAATGCCGATACATCGCTAAGCAAAACCAGCGCCAGCGAGA
TATAAAGCAACGTGGTAACGCCAATCGCCACCAGAAACGCCCGTGGCATAATGACCTGCGGATCTTTCACTTTATCCGCCGCGTTCGCCATCATGCCAAA
GCCCGCATAGGCAAGGAAGGTTATCCCGATACAGGAGAAGAACGCACCGGAGCTGGGGGCGCAGAGACGGAAATATGCGCCGGTTGCAGCGACCAGACAC
CGGCAATAATCAGCAATAACAGAATCATCATTTTAATGCCGACGAGGATCACTTCCAGCCGCCCTACTGCATGGTTGCTTAAGGAGTTGAAAAGCGTCAT
CACCGCAATGCTCCCCAACGCGTAGAGCAATATAAGGTGCTCCTCCTGACTGCCTTCATGCAAAAACTGCACGGCATAAGCGCCAAAAGCACGGGCGACC
ATGGCGATGCTCACCGCCAGCGTCAACAGGTACAATAACGAGAGCGCCAGCGAAAAGACGCCGTTGCCTAATCCGCGACGAAAGAAGTCGATAATACCGC
CATTGCTGGGATAGCTCGCCCCCAGACGCGCATAGGCATAACCGGAAAACATCGCCACAATACCGCCAAAAGCAAAGGCGACCCAGGTCGAGGCTTCCAT
TAGCAACGCAGCCTGACCCAGCAGCGCGAAGATCCCCGCCCCCACCATTGCCCCAATACCGATGGAAACGACGTTCCATAGACCGAGGGGTTTGTTACCG
TTATTACCTTCCGTGTTCATCATGATCAGCCCTTAAACACGTTATAGCCGAGTTGCTTAGCGACCGATGCCACCATTTTTTGACCGCGAACACTGTTGCC
TTCTTCGTCCAGCGGTGGTGAGAACGCGGCAATTCCCATCACGCCAGGGACGACCGCCAGAATACCGCCACCTACACCGCTTTTGCCCGGTAAACCAACG
CGATACGCCCAGTCACCAGAGCGACCATACAGCCCTTCCATCATCATTTCAGCCAGAATGTACGGCACGTTGTCGGCCTGAAGAACGCGTTTATGCGTCA
GCGGATTCACACCACCCGCCGCCAGCGTCGCGCCAAGCGTTGCCAGTTCAATAGTATTGATGAGCGTGGAGCACTGACGGGTGTACACGTCACAGGCTTC
CATTGCATCACAATAGAGATATCCGGCGGAGTACAGCAGCCAGGCAATGGCCCGGTTATGGAAGTTGGTTGTTTGTTCCGACTGGTTGACTTCATCAGAG
AGCGCTACCTGCTCACCAGCCAGTTGTTGTTGGATATGTAAAATTCGCTGCCAGCGTTGTTCAGTATTTTCAGCGTTAATCAGGCTGGTGGTGGCAATAG
CGCCAGCATTTACCAGTGGCGAAAGCGGTTTGCCGCCATGCAACTCTAAGGCGATAACTGAGTTAAAGGGCAATCCGGTCGGGTCAGCGCCAACTTTGTC
CTGTACCGCCTGCGGGCCGACATCTTCTAACGCAAGGGCTAACGTACAGACTTTCGAGATGGATTCCAGCGCAAAGCGGTAATCACTATCACCCGCGCGA
TAGATGTTGCCATCGCAGGTCACAATAGCCACTGCTGCCAGTTGACCAGGTACATTCGCCAGAAAGGGAATGTAGTCGGCATTTTGTCCGCCGTTAAGTG
AGTGAAATTGGGTGTAAGCCTGATCCACTGCCTGCTGTAATTTGTTTGCATCTAACATCTTTTGTTAACTCCTTTTTATAGATGCGGGAGGTAATTCCTC
ACCCCGGTGCCGATTTTCAGGCATCCTGATTTAACTTAGCACCCGCAACTTAACCACAGGAAAACAAAGAGATAAATGTCTAATCCTGATGCAAATCGAG
CCGATTTTTTAATCTTTACGGACTTTTACCCGCCTGGTTTATTAATTTCTTGACCTTCCCCTTGCTGGAAGGTTTAACCTTTATCACAGCCAGTCAAAAC
TGTCTTAAAAGGAGTGTTTTATGTCACAAACTATCGACCTGACCCTGGACGGCCTGTCCTGCGGTCACTGCGTTAAACGCGTGAAAGAAAGTCTCGAACA
GCGCCCGGATGTTGAGCAGGCGGATGTGTCTGTCACTGAAGCGCACGTTACCGGGACTGCCAGTGCAGAACAGCTGATCGAAACCATCAAACAAGCGGGT
TATGACGCATCTGTAAGCCACCCAAAGGCTAAACCGCTGGCGGAGTCATCAATCCCGTCGGAAGCACTGACAGCGGTTTCTGAGGCGCTTCCGGCAGCGA
CCGCCGATGATGATGACAGCCAGCAGTTGCTGCTGAGCGGCATGAGCTGCGCCAGCTGTGTCACCCGCGTACAAAATGCGCTGCAAAGCGTACCGGGCGT
CACTCAGGCACGGGTAAACCTGGCGGAGCGTACTGCGCTGGTGATGGGCAGTGCCTCCCCACAAGATTTAGTGCAGGCGGTGGAAAAAGCGGGCTACGGC
GCGGAAGCGATTGAAGATGACGCTAAACGCCGCGAGCGCCAGCAAGAAACCGCCGTCGCTACGATGAAGCGCTTCCGCTGGCAGGCGATTGTCGCACTGG
CGGTGGGTATCCCGGTGATGGTCTGGGGGATGATCGGCGATAACATGATGGTCACCGCTGACAACCGCAGCCTGTGGTTGGTTATCGGCCTGATAACCCT
GGCAGTGATGGTTTTCGCCGGCGGCCATTTTTACCGTAGTGCATGGAAAAGCCTGCTGAACGGTGCAGCGACGATGGATACGCTGGTGGCGCTGGGTACT
GGTGTGGCGTGGCTCTATTCGATGAGCGTTAACCTGTGGCCGCAGTGGTTCCCGATGGAAGCGCGGCATCTTTACTATGAAGCCAGTGCGATGATTATCG
GTCTGATTAATCTCGGTCATATGCTGGAAGCGCGCGCACGTCAGCGTTCTTCAAAGGCGCTGGAGAAATTACTCGATTTAACTCCGCCGACGGCGCGCCT
GGTTACTGACGAAGGTGAAAAAAGCGTGCCGCTGGCGGAAGTGCAGCCAGGTATGTTGCTGCGCCTGACGACCGGCGATCGCGTACCGGTAGATGGTGAG
ATCACCCAGGGCGAAGCGTGGCTGGATGAAGCGATGCTGACGGGCGAACCTATACCGCAGCAAAAAGGCGAAGGCGATAGCGTCCATGCCGGGACAGTGG
TGCAGGACGGTAGCGTGTTGTTTCGCGCCAGTGCGGTTGGCAGCCATACTACGCTGTCGCGGATTATTCGTATGGTGCGCCAGGCCCAGAGCAGTAAGCC
AGAAATCGGTCAGCTGGCGGATAAAATCTCAGCCGTATTTGTGCCGGTAGTGGTGGTGATTGCGCTGATCAGTGCGGCAATCTGGTATTTCTTTGGTCCG
GCACCGCAGATTGTCTATACCCTGGTGATTGCCACCACGGTGCTGATTATTGCCTGTCCGTGTGCGCTGGGGCTGGCGACGCCGATGTCGATTATTTCGG
GCGTCGGGCGGGCGGCTGAGTTTGGCGTGCTGGTACGGGACGCCGACGCGCTGCAACGCGCCAGTACGCTCGACACCGTAGTGTTCGATAAAACCGGGAC
GCTGACCGAAGGGAAGCCGCAGGTTGTCGCAGTAAAAACATTTGCTGATATTGATGAAGCGCAAGCATTGCGTCTGGCGGCAGCGCTGGAGCAAGGTTCC
AGCCACCCGCTGGCACGGGCTATCCTCGATAAAGCAAGCGATATGCAGCTACCGCAGGTCAACGGTTTCCGCACATTGCGCGGGCTGGGCGTGAGCGGTG
AAGCTGAAGGTCATGCGTTATTGCTGGGCAATCAGGCGTTGTTAAATGACCAACAGGTCAATACCAAAGCAATTGAAGCAGATATTTCAGCTCAGGCATC
GCAAGGGGCAACGCCTGTGCTGCTGGCGGTTGACGGGAAAGCGGTAGCCCTGCTGGCTGTACGCGATCCGTTGCGTAGTGATAGCGTGGCGGCGCTGCAA
CGCCTGCATAAAGCGGGATATCGCCTGGTGATGCTAACCGGGGATAACCCGACCACCGCCAATGCGATCGCCAAAGAAGCAGGGATTGATGAGGTGATAG
CCGGGGTGCTGCCGGACGGTAAAGCCGAAGCGATCAAACGTCTGCAAAGTGAAGGACGTCAGGTGGCAATGGTGGGCGATGGCATTAACGACGCGCCAGC
GCTGGCTCAGGCGGATGTCGGCATTGCAATGGGTGGCGGCAGTGATGTTGCCATTGAAACCGCGGCGATTACCCTGATGCGCCATAGCCTGATGGGTGTT
GCAGATGCGCTCGCGATTTCCCGCGCAACGCTGCGCAATATGAAGCAGAACCTGCTCGGCGCGTTTATCTACAACAGCATTGGTATTCCGGTCGCCGCCG
GTATTTTGTGGCCGTTCACTGGAACACTGCTTAACCCGGTGGTTGCCGGAGCGGCAATGGCGCTCTCGTCGATTACCGTAGTGAGTAACGCCAACCGGTT
GCTGCGGTTTAAACCAAAGGAATAATTACATCATTACGGATGCACTGCTTTAGGGTGGCGCATCCGTTATAGGGAAATTATTCTACGCGACCTTTTTGCA
CGCTCTTCACGGCGTGCCAAATATTCAGCCACTGTTTCAATCCGTCCCAATTCTTCCTGGGTACGCATGTTGTTTTCAACTTCCCAAAGATCAACTGCCG
CCTGGAGGTTTAGCCAAAAATCGACTGTGGTATCAAAAACTTTCGCCAGACGGAATGCCATTTCAGTGGTGAGTTTACGATTATTATTGATCAGTGCACT
GACGCTATTACGATGAACATGCAGCAACTCTGCTAACTCATTGATTTTCAAATCGAGCGGTTCCAGATATTCATAGAGAAGAATATCTCCAGGTGTCGTC
GGTTTTCTTGTTGCCTGTTTCATGGTTTTTAACTGTTGCTTCCTTGTGAAATAGCGATACAGGAACATACTGAAGCATACAAACACATCAAACAAGTCCC
CAACTCCATTTGCGATTTGCGCCATCCCTCCCCGCGCGCTAGCATGATATTTCACAAAGGGAGGTCGTATGGATCTGTTGTACCGGGTAAAAACGCTTTG
GGCCGCGCTGCGCGGTAATCATTACACCTGGCCTGCTATCGATATCTCTCTTCCCGGCAATCGCCATTTTCATCTGATCGGCAGTATTCATATGGGTAGC
CACGATATGGCTCCCCTGCCCACCCGTTTGCTCAAAAAGCTCAAAAACGCCGATGCGCTGATCGTCGAGGCGGATGTTTCCACCAGCGATACGCCTTTTG
CCAATTTGCCTGCCTGCGAGGCACTGGAAGAGCGCATTAGCGAGGAGCAACTCCAAAACCTGCAGCACATTAGCCAGGAGATGGGCATTTCTCCGTCACT
CTTTTCTACTCAACCGTTGTGGCAAATCGCGATGGTTCTTCAGGCGACGCAGGCGCAAAAACTGGGGCTGCGGGCAGAATATGGTATCGATTACCAGCTA
TTGCAGGCGGCGAAGCAACAACATAAACCTGTAATTGAACTGGAAGGCGCAGAAAAACAGATTGCCATGTTGCTCCAGCTCCCTGACAAAGGACTGGCGC
TGCTGGACGATACGCTGACCCACTGGCACACCAATGCACGGTTGCTGCAACAAATGATGGGCTGGTGGCTGAATGCGCCGCCGCAAAATAATGAAATAAC
GCTGCCCAATACATTCAGTCAGTCGCTGTACGATGTGCTGATGCATCAGCGAAATCTCGCCTGGCGGGACAAATTACGCGACATGCCGCCGGGGCGCTAT
GTGGTCGCGGTCGGTGCTTTACATCTGTATGGAGAAGGGAATTTGCCGCAGATGTTGCGCTAAAAAAATGGCCAATATCGCTATTGGCCCGTCAAAGAGG
AATTTCATATTTTTATTATTATGCCGTCACTTTAAGCGACGGTGTAAGTCGATTGTCGCTCAATCTCACCATCCTGCCAATACTCTTAGGCAAGATGACT
CTTTTTGGGACCGCCATCAGGCGTATGCTTGCTTCGTTTTTTGTTTAAGGCAGGAAAATTACCATGACACCCGCAGTTAAATTACTCGAAAAAAACAAGA
TTTCGTTTCAAATCCATACCTACGAGCACGATCCGGCTGAAACCAATTTTGGCGATGAAGTCGTCAAAAAATTAGGTTTGAATCCGGATCAGGTCTACAA
AACGCTGCTGGTCGCAGTTAACGGCGATATGAAACACCTTGCCGTGGCCGTTACGCCGGTCGCCGGTCAACTGGATCTTAAAAAAGTGGCGAAGGCGCTG
GGTGCCAAGAAAGTAGAGATGGCCGATCCGATGGTCGCGCAGCGTTCGACGGGGTATCTGGTAGGGGGATTAGCCCACTGGGGCAGAAAAACGTCTGCCG
ACGATTATCGACGCCCCCGCACAAGAATTTGCCACTATTTATGTTTCCGGCGGTAAACGCGGGCTGGATATCGAACTGGCGGCAGGCGATCTGGCAAAGA
TCCTCGATGCCAAATTTGCTGATATCGCCCGCCGCGATTAAGCATTGTGCCGGATGCAAATATCCGGCACTTTCGGATTACTGCCAGCTCACCTCACCTT
TCGGTTCATAAACACTCACATCCAGCGGCGAGCTTTTCTGGATATACGCTTTCAGCACTTCGGCATCAATAAAGCCGGTATTCACATAGCCCGGTTTGTT
ATCAAGGCGCGGATAGCCATCACCGCCGGTGGCATTGAAGTTTAATGTCGCCATACGATAAGTTTTCGCCGGATCGACCGGTTCGCCTTTGATTTTAAGG
TCGTCCAGTTTGCCGTCTTTCGCCACAAAGCTAACGTTGGCAAATTGCGGGTAGGCACCTGAATCTGGCTTCATTTGTGCGACGGCGGTCAGGTAATCAA
TCACCTCTTTACCGGTCATGTCGGCATACACCACCACATTGCCGAATGGCTGCACTTTCAGTACGTTTTTATAGCTGATATCACCTGCTTCGATAGAATC
ACGAATTCCGCCTCCGCTCATCACCGCAAAGTCGGCACCAGTGCGATCCATTTGTGCTGCCAGAATCAACCGCCCCATATTGGTCTGTACAAAACGCACT
TTGTCACGATCGCCTTCCAGACGACCATTGGTTTCGCCTATTTTCACTTCCAGCTGCGCTTTGCCTTTGTTCTGGAACGGTGATAACAGCGAGATCATTT
GCTGGTTTTCAGCGATTTCAGGGGTGTACAGCACGCGCTCGCTTTTCCCGTCTTCCCAGGTCACTTTCTTCTTCAGGTTCACCGGAATCAGCTGGTAGTT
AACCATTTTCATTTCGCCATTACGAAACTCAAAATCAGCCCGTCCCACGTATTTGCCCCACTCATGCGCCTGCACAATCCAGATGCCGTTTTGTTGATCC
GGTTTGCATGGCGTACCCGGCACGTAATCGACCTGTTTTTTGTTTTCTGCCGCCATACAGACCGGATCTTGCGAGTGACCACCGACGATCATCGCCAGCG
ATCCGGCAGGCAGCGCGCGTGCCATCTCCACATCGCCCGGTGCGTTAGAGCCGTGCTCACCATTGTCGTAATGCCCCATATGGGTCGCCGCGATAATAAT
GTCTGGCTTTTCTGTCTGTTGCAGCTCCTGAATCACCAGCTTCGCTTCATCAGCGGGCTTACGAAATTCGATATCAGTGAAATATTCCGGATTACCAATT
TTGGCTGTGTCATCCGTCGTCAGGCCAATAACGGCAATTTTCAGATCCTGACGCTTAAACAGCGCCCATGGTTTAAACAGGCGCTCGCCGGTACTTTTCT
GGTAGATATTGGCGGAAAGCAACGGGAACTTAGCCCACTTTTCCTGCTGGCGTAATACGGTGAGCGGGTTATCAAATTCATGATTACCGATCGCCATCGC
GTCATAGCCCACCAGATTCATACCGCGAAAATCAGGTTCGGCATCCTGTAAGTCGGACTCGGGCACGCCAGTGTTAATGTCGCCACCGGAAAGTAGCAGC
ACGCTACCGCCTTCAGCCGCAACCTCTTTGCGGATACCATCCACCAGCGTTTTTTGCGCCGCCAGACCATATTCACCATATTCATTGCGCCAAAAATGCC
CATGATGATCATTGGTGTGCAGAACTGTAATTTTGTAGGTTTTATCCTGCTCGTACGCCAGAGCAGTTTCACTCGCCAGTGTAAATGTGGTTAACAGTGC
TAACGCCACGCCCCGCTGCAATAATTTCATACTTCTCTCCCTGACCTGATTTCAACGTGTTGAAAAATAGTATGACGCGACATCATAAACAAGTCTGCGT
CCGGTGAAGATAAATCTGCATCCAGATTAGAAATTCTGTATTCCGCGTTGAGACTTCCTTCAGGCGGCGCATACAGGTATGTTAGTCGGGTAATAATCAC
AAATAAGATCATTCTTTACATCGCAACCCTGAAAAAGTGACTTTCCTATGGCAATGAGTGAACAAACCCAGCCTGTGGCGGGCGCGGCTGCGTCAACGAC
TAAGGCCCGAACATCGTTTGGTATTTTAGGTGCTATCAGCCTCTCACATCTGCTGAACGACATGATCCAATCGCTGATTCTGGCGATTTATCCACTGCTT
CAGTCAGAATTTTCTCTGACATTTATGCAGATTGGCATGATAACCCTCACCTTCCAGCTCGCCTCTTCGCTACTGCAACCGGTGGTCGGCTACTGGACCG
ATAAATATCCGATGCCGTGGTCGTTGCCGATTGGCATGTGTTTTACCTTAAGTGGTCTGGTGCTGCTGGCGCTGGCGGGCAGTTTTGGCGCAGTTCTGCT
GGCAGCGGCGCTGGTCGGTACCGGTTCATCGGTCTTTCATCCGGAATCTTCTCGCGTGGCCCGTATGGCTTCCGGCGGGCGTCATGGCCTGGCGCAATCT
ATATTTCAGGTCGGCGGCAACTTTGGCAGTTCCCTGGGCCCCTTGCTGGCGGCGGTGATTATCGCGCCTTATGGCAAAGGCAACGTTGCCTGGTTTGTGC
TTGCGGCACTGCTGGCGATCGTGGTGTTGGCGCAAATCAGCCGTTGGTACTCGGCACAGCACCGAATGAATAAAGGAAAACCCAAAGCGACGATTATCAA
TCCACTGCCGCGCAATAAAGTTGTTCTGGCGGTCAGCATTCTGTTAATCCTCATTTTCTCGAAATATTTCTATATGGCGAGCATCAGCAGCTATTACACC
TTTTATCTGATGCAAAAATTCGGATTATCTATCCAGAATGCTCAGCTTCATTTGTTTGCCTTCCTGTTTGCCGTTGCGGCAGGTACGGTGATTGGCGGGC
CTGTAGGGGATAAAATTGGACGGAAATATGTGATTTGGGGCTCTATCCTCGGCGTTGCGCCGTTTACGCTGATTTTACCCTACGCCAGCCTGCACTGGAC
GGGGGTTTTAACGGTGATTATTGGATTTATCCTCGCTTCGGCATTCTCTGCCATTCTGGTCTATGCCCAGGAGCTGCTTCCGGGACGTATCGGTATGGTT
TCTGGACTATTTTTCGGTTTTGCTTTCGGCATGGGAGGTCTGGGGGCGGCAGTTCTGGGGCTTATCGCCGACCACACCAGCATAGAGTTAGTCTATAAAA
TCTGTGCTTTCCTGCCACTATTGGGGATGTTGACCATATTCCTGCCTGATAACCGGCATAAAGACTGATTTCATTGCAGCCAAAGGCAAACTTTGGCTGC
ATCGTTTTACAGTCGCCATAAGCCTTTCCTCTGTTAAACCGCCTTCTGTTTTCCGATCCGTGCTTTTTTTGCAGCTAATTCCATTTTTCTGCAAAATTCA
ACAATTATTCATAAACATCATCAATGAAATTGTCATAAACTATTACCTGTAATTTTGGTTTTCCCGGCCAAAAATGGACAATAACCACCAGGAAAAGGAG
ACGGAATGCATCACACCACCCCGCTTATCACCACCATTGTTGGCGGCCTTGTGCTCGCCTTTATCCTCGGCATGCTGGCCAATAAACTACGTATTTCTCC
TCTGGTGGGATATCTGTTAGCGGGTGTGCTGGCAGGACCATTCACTCCGGGCTTTGTTGCCGATACCAAGCTTGCGCCGGAACTGGCTGAACTGGGCGTT
ATTTTGCTGATGTTCGGCGTCGGTTTGCATTTTTCGCTCAAGGATTTGATGGCGGTAAAGTCCATCGCCATTCCCGGCGCGATCGCCCAGATAGCCGTGG
CGACGCTGCTGGGTATGGCGCTCTCCGCCGTGCTGGGCTGGTCGTTAATGACCGGTATCGTGTTCGGCTTATGTCTTTCCACCGCCAGTACCGTGGTGTT
ACTGCGCGCACTTGAAGAACGGCAATTAATTGACAGTCAGCGTGGGCAAATCGCCATCGGTTGGTTGATTGTGGAAGACCTGGTGATGGTCCTGACGCTG
GTATTGCTACCCGCGGTAGCAGGAATGATGGAACAGGGCGATGTGGGCTTTGCCACTCTTGCAGTCGATATGGGGATCACCATCGGCAAGGTGATCGCAT
TTATCGCCATTATGATGCTGGTAGGTCGCCGTCTGGTGCCGTGGATTATGGCACGCAGCGCAGCAACCGGTTCCCGCGAGCTGTTTACCCTGTCGGTGCT
GGCGCTGGCGTTAGGGATTGCCTTTGGTGCGGTAGAGCTGTTTGATGTCTCCTTTGCACTCGGTGCGTTCTTTGCCGGGATGGTACTGAACGAGTCTGAA
CTGAGTCACCGTGCCGCCCACGATACACTGCCATTGCGCGACGCGTTTGCGGTGCTGTTTTTTGTCTCCGTCGGGATGTTGTTTGATCCGTTAATTCTGA
TTCAGCAACCGCTGGCAGTACTGGCGACGCTGGCAATTATTCTGTTTGGTAAATCGGTCGCGGCCCTGTTCCTTGTGCGTTTGTTTGGTCACTCCCAGCG
CACGGCGTTAACCATCGCCGCCAGCCTGGCGCAGATTGGTGAGTTCGCGTTTATCCTGGCGGGACTAGGAATGGCATTGAATTTACTGCCGCAGGCCGGA
CAAAACCTGGTACTGGCAGGGGCGATCCTGTCGATTATGCTCAACCCGGTACTGTTCGCACTACTGGAGAAATATCTGGCGAAGACCGAAACGCTGGAAG
AGCAGACGCTGGAAGAGGCAATCGAAGAAGAGAAGCAGATCCCAGTGGATATTTGCAACCATGCGCTACTGGTGGGTTACGGTCGTGTAGGCAGCCTGCT
GGGGAGAAATTGCTCGCCTCTGATATTCCGCTGGTGGTGATTGAGACGTCACGAACCCGTGTTGATGAGCTGCGCGAGCGCGGGGTCCGCGCAGTATTGG
GCAATGCGGCGAACGAAGAAATTATGCAACTGGCGCATCTGGAATGTGCAAAATGGCTGATCCTGACGATTCCCAACGGCTATGAAGCGGGCGAGATTGT
GGCATCTGCCCGCGCGAAAAATCCGGATATTGAGATTATTGCCCGCGCCCATTATGACGATGAAGTGGCGTATATCACCGAACGTGGTGCGAATCAGGTA
GTGATGGGTGAGCGTGAAATTGCCCGTACTATGCTGGAACTGCTGGAAACGCCACCGGCGGGTGAGGTGGTGACGGGGTAAACGGTGGTTGCCGGATAAT
AGGCGCGGATATGTAGGCCTGATAAGACGCGCCAGCGTCGCATCAGGCATTGAAAGCAAAATGCCAGATGCGGCGTGAACGCCTTATCTGGCCTACGAAC
CGACGATAACTTAACGATCCCAGTAAGACTCTTCCAGGCTGTCTTCACGCTCCGGCAAGCCGCGCGTTAAACGAGGTGAATGCTGGTTCAGTACCTGATA
GCTCACACGGTTAGCATATTTACACACCTGCGCTAACGATGAATAAGTTAACCAGGTGAATTTATGTTTGCTGGAGTTTGGTACGTTGCTACGGTGGTAG
CTGTTGGCGGTAATGTCATGCAGCAACGCTGCCAGTGCGCCATCCCCTGCTCCGTTAGTGTTCATGATTTTTCCGGCCCGCCCATATACGGCGCAATGTG
CGAATAGACACGCAGCGGATTCTGGCAATCCTTGTGGCGCATGGCGCGGCTAAACTCATACTGGTTAAATTCCGCTATAGCACCCGGCAGCAGCGGATGC
TGGGTTTTACGTTTCGCTTCGTCTTCGGTAAAGCCTGCCATATACAAGCCGATTGGCCCGGCGGTGCACAGCACCAGATCTACCCAGTCCAGCGCCTTGT
CAGATGCCAACAACGGATCGCTTTCTCCGGTCAACGCTTCGGCTTCATCTTCGTTCATCGCAAGGATAGAGACGTGGTCTTTGAGGAATTGCTGCCACCA
CTGCGGATTCTCGGCAATGACAAACTTGGTGCCCAGCGTCAGCACCACCGGTACGTTATATTTCTTCGCGTACTCAATGGCTTTCATGGTTGCTTCCGGC
ATGGGTTCACCCGGCTTGCAACGCACCAGATAAGAGGTGAGAACCAGTGCCGAGGCTCCGGCAATCACATCTTCCGGAATACTTTCAGCCCGCAGCTGGT
TCATGTGGCCGGGGCTGATAGCAAAGGTACGTTCCCCGGACTCGCCAATCAGCGTAAAGCAACGACCAATTGGGCCATCCACGCCTTGTAGATAGTTAAG
ATCGGTACGGCTGGAGGTGTTACACAGGTAACGATAGGCATAGCTGCCAATTTCAATATTGCTGCACATGACGCCCAGCAGCACCGAACGGTCGTCCGCG
AGCACCGAGTAGTTGTGCATGGTGTTACCAATGGTGCCACCCGCAAACTGATGGGTAATCAGGTTTTTCTGTTTTAGTTCCTGATAAAGCGCTTCGGCAA
CGTCATCCTCAATCACCAATGAATGCCCGGCGCTTAATCCATAACGCTCAATGAATTCATCATCCACTTTCGCTTCAATATCGACCAGCGTTTGATCGAT
ACCCACTACCCAGGCGGCGCTGGTTTCGTTTTCTGGCTGGAATTGCTGAAGCAGCGGATCGCGTGCATTTACGGGGAAGTAATGTTTGGATTTACGTTTA
CCGGGAAATTTCATGGTTGTTTTTACGGGTGGTTAACTGAGCGGCGAATGTTAACACAATCTGACGGGAGCGCGCGAGACGCAGCCAGTTTCAATATCAG
CAGGCGGGATCGCATTTTCATGGCAGTGGTTCCTTACAATGACGTAATTTGAAAGGAGTTTTTGCATGAAGCCGGAAAACAAATTACCCGTTCTGGACCT
TATCTCTGCTGAAATGAAGACCGTTGTGAATACTCTTCAGCCGGATTTACCGCCCTGGCCTGCAACGGGAACGATTGCTGAGCAACGACAGTATTACACG
CTTGAGCGCCGATTCTGGAATGTGGGCGCTCCAGAAATGGCAACCAGAGCTTACAGGGTTCCAACAAAATATGGGCAGGTGAAAACACGTATCTTTTATC
CGCAGCCAGATAGCCCGGCGACGCTATTTTATTTGCATGGAGGCGGTTTTATTCTCGGCAATCTCGATACCCACGATCGCATCATGCGCCTGCTGGCAAG
CTACAGCCAATGTACGGTGATTGGCATTGATTACACCCTTTCACCTGAAGCGCGTTTTCCGCAAGCGATAGAGGAAATTGTGGCTGCCTGTTGTTATTTC
CACCAGCAGGCGGAGGATTATCAAATCAATATGTCCCGCATTGGTTTTGCCGGTGATTCCGCAGGTGCCATGCTGGCGCTCGCCAGTGCGTTGTGGTTGC
GCGATAAACAGATCGATTGCGGTAAAGTTGCGGGCGTTTTGCTGTGGTATGGGCTTTACGGATTACGGGATTCCGTGACTCGTCGTCTGTTGGGTGGTGT
CTGGGATGGCTTAACGCAACAGGATTTGCAGATGTATGAAGAGGCGTATTTAAGCAACGACGCGGACCGCGAGTCGCCATATTACTGCCTGTTTAATAAT
GATCTCACTCGCGAAGTTCCGCCCTGTTTTATTGCCGGGGCGGAGTTCGATCCACTGCTGGATGACAGCCGTCTGCTTTACCAGACGTTAGCGGCGCATC
AGCAGCCCTGTGAGTTCAAACTCTACCCAGGCACGCTGCACGCCTTTTTGCATTATTCACGGATGATGAAAACCGCCGACGAGGCTCTTCTCGACGGCGC
TCAGTTCTTTACCGCTCAGCTTTAGCGATACGCGGCAACAAGATTAGCCATCATTTCGATATGTTCCGACGTGGCATTAAGCGCCGGAATATATTCATAT
TTTTCCCGCCAGCGCCGAGGAAGACTTCACGGTTTTGCTCGGCAATCTCTTCCAGCGTCTCCAGACAATCCGCAGCAAAGCCCGGGCACATCACCTGAAT
ATGACCCACGCCTTTTTCTCCGAGCATTTTCAGCGTTTCGTCGGTATAAGGCATCAGCCAGGGTTCCCGGCCAAAGCGCGACTGAAAGGTCATCATCACT
TTTTCCGGTGCCATCTCCAGTGCGGAAGCGAGTTCGCGAGTTGTTGTGCGGCAACGTTGCGGGTAATCATCGCCTTCATCTGCATAACGCTGGGGAATGC
CATGATAAGAGAGCAACAACAGATCCGGTTCGCCATGTTTGGCAAAAGAAGCACGTACGCTGTTCGCCAGTGCATTAATATAATCGTGGTTATCGGCGTA
ATCACGAATAAACGATATCCCCGGAATGCTACGTTTGCGCGCCAGAATGCGTGCCAGTTCATCCCATACCGCACCGACCGTTGAACAGGAGTATTGCGGA
TAAAGCGGCAGCACCACAATATGATCTACATGCTCTGCCAGAAGTTCATCTACGGCGCTTTCCAGTGATGGCGAGCCGTAGCTCATTCCCAGCGCCACGG
GCGTCTCCGGTAAACGTTGCGCCAGCGCCTGCTGTTGCTGGCGGCTGTAAACCATCAGCGGCGAGCCACCTTCCATCCAGACAGAGGCATACAGCTTCGC
CACACGCGGCGAACGCAGCGGCAAAATCACGCCGCGCAGCAACGGCCACCATAACAACCGTGAGGTATCAACCACGCGTCTGTCGCTTAAAAATTGTTTC
AGATAGCGTTTTACCGCTTCAGGTGTGGGGGCATCGGGCGTACCCAGGTTTGCCAGCAGGATACCGGTTTTAGTCTGACGCATTACCGCCTCTTATCGAT
TCAACTTGTTGATAATTGTAGCGGAAAAGTGAAGAAGAAGAACTAATTGCTGTAAGAGGTATTGCCTGAGGAGGATGAGCAGACCTGCCCGAAAGCAGAT
CTGCTGCGGCTTGATTAGCCGAGAATTTTTTCCAGAGCTGCGCGAACTTCAGCCACCGGCTTGGTGCCGTCAACTTTCGCGTATTTGGTGTTACCCGCTT
CCGCTTCTTTGGAGTAGTAGCCGATCAGCGGTGCAGTCATCTGATGGTATTCAACCAGACGTTTACGTACGGTCTCTTCCTGATCGTCTTTACGGGTAGT
CAGCTCTTCACCGGTAACGTCGTCTTTGCCTTCTACTTTCGGCGGATTGAATTTAACGTGATAAACACGACCAGACGGCGCGTGAACGCGGCGGCCTACG
ATACGGTCAACAATCAGTTCGTCCGGTACGTCGAATTCCAGAACGTAATCAACATTGATGCCCGCTTCTTTCATCGCGTCTGCCTGCGGAATGGTACGCG
GGAAGCCGTCCAACAGGAAACCGTTGCGGCAGTCTTCCTGAGCAATGCGCTCTTTAACCAGCGCGATCACCAGTTCGTCGGTGACCAGTTTGCCAGCATC
CATAATGTCTTTTGCTTGTTTACCCAGCTCGGAGCCTGATTTGACCGCAGCACGCAGCATATCGCCAGTGGAGATTTGCGGAATACCATATTTCTCCATG
ATGAACTGAGCCTGAGTCCCTTTCCCCGCGCCCGGAGCGCCAAGCAGAATGATACGCATTGCGAAAATCCCCTTAAAATGTGTCGAATTTTTTGAAAAAG
CGATAAACGATACCACCAACAGGCGATTGCCTCAAGAAAGGCACCTGAGGCTGAAACGGTTAATGGCGAGATAATTTGCGGAAAGTGCAGATGAAGAAAA
GAAAAATGCCGGATGACACGAAGGTCATCCGGCATGGCATCAAGAAACCAGCAGCTGGTTCATACGACGAATAAACAGGTTCGGATCTTCCAGCGTGCCG
CGTTCTGCCAGCAGCGCCTGATCCAGCAGCAGTTCTACCCACTCGCTGAACTTCGCTTCATCTTCAGTATCCGCCGCACGTTTCACCAGTACGTGATCCG
GGTTCAGTTCGAAGATGTATTTCACTTCTGGCACTTTCTGGCCCGCCGCAGCGAACAGTTTCGCCATCTGAGTGCTCATTTCGTCCGCGTCGGTCGAAAC
GATCGCTGGCGTATCGGTCAGACGGTGAGTCAGACGGACATCTTTCACGCGCTCGCCGAGCAGAGCTTTCACACGGTCGATGAACGGAGTCAGTGCTTTC
TCCGCTTCTTTCGCGCTCTCATCAACTTCGTCAGCCAGTTTTTCCAGCGACTCGTCAACTTTAGACACAGACTGGAACGGTTTACCGTCGAACTCAGTCA
GATAGTTCATCATCCACTCATCGATGCGGTCGGAAAGCAGCAGAACTTCGATGCCTTTCTTACGCAGCAGTTCCAGGTGCGGGCTGCTCTTCGCTGCCGC
GTAGCTGTCTGCGGTGATATAGTAGATTTTCTCCTGCCCTTCTTTCATGCGGGAAACGTAGTCTTCCAGAGACACGGTCTGCGCAGAAGAATCGGTATGG
GTAGAAGCAAAACGCAGCAGTTTGGCGATCGCTTCCTGGTTAGCGAAATCTTCCGCCGGACCTTCTTTCAGTACCAGGCCAAACTGTTGCCAGAAGGTCT
GGTATTTTTCCGCGTCGTCTTTCGCCAGTTTTTCCAGCATTTGCAGCACACGCTTGGTCAGCGCATTGCGCAGGTTACGCGTTACCGTGCTGTCCTGGAG
GATTTCACGGGAAACGTTCAGCGGCAGATCGCTGGAGTCAATCAGACCACGCACGAAGCGCAGATAGTTCGGCATGAACTGTTCTGCGTCGTCCATGATG
AACACACGCTGAACATACAGTTTCAGACCGTGTTTATGATCGCGGTTCCACATATCCCACGGTGCCTGAGACGGAATGTACAGCAGGCTGGTGTACTCCT
GCTTACCTTCAACGCGGTTGTGGCTCCAGGTCAGCGGATCGTTAAAGTCGTGGGCGATGTGTTTGTAGAACTCTTTGTACTCTTCATCGGTGATTTCCGA
CTTGTTACGAGTCCACAGCGCCTGCGCTTTGTTGATTTTCTCCCAGGAGATAATGGTTTCGCCGTCTTTCTCTTCGCGTTTTTCGATCTCTACCGGCAGC
GCGATATGGTCGGAATATTTGCTGATGATGGAACGCACACGCCAGTCATCGAGGAACTCGTCTTCGCCTTCACGCAGATGCAGGGTGATTTCAGTACCAC
GATCTTCTTTAGTGATGTCGGCAACGGTGTATTCACCTTCGCCAGCCGATTCCCAGAAGACGCCGTTTTCTGGTTTTTCGCCTGCCGCGCGAGTACGCAC
GGTCACTTTGTCAGCCACGATAAACGCAGAGTAGAAACCAACACCAAACTGACCGATCAGCTGGCTGTCTTTCGCCTGGTCAGAACCCAGGGATTCGAGG
AATGATTTGGTGCCGGATTTAGCGATAGTCCCCAGATGGTCAATCACTTCGTCGCGGGTCATCCCCACGCCGTTATCGGAGATGGTCAGCGTGCGCTTGT
CTTTATCGAAAGAGACACGAACGCGTAGTTCACCATCACCTTCGTACAGGTCCGGGTTAGAAAGCGCGCGGAAACGCAGCTTGTCCGCCGCATCGGAGGC
GTTAGAGATAAGCTCACGCAGGAAGATTTCTTTATTGGAATAGAGAGAATGGATCATCAGGTGCAGAAGCTGTTTCACTTCTGACTGAAAACCACGTGTT
TCTTGTCCTTTCATGTAGGTCTACCTCAATAATGCCATTTTAAGGTTAAAAACAGGATGAGGGAGAGATGGGGACAAGGGAGAGTAATTTCAAGCGAGAG
CAGGTGATCCTGCTCTCGTTTGCTTAAAAACGAATCTTATGACGCCCGGCAAGGGAGTGTGACAGCGTGGTGCCATCGACCATTTCCAGTTCGCCGCCAA
CCGGTACGCCATGAGCGATTCGGCTGGCTTCCACGTCATATTGCGCACAAAGCTCGGCAATGTAGTTAGCGGTAGCTTCACCTTCAACCGTGGGGTTGGT
GGCGAGGATCACTTCAGTGATTTTTTCCTCTGCCAGACGCTGTTCCAGACGATCAAGCCCGATATCATCAGGACCGATGCCGTCCAGCGGTGACAGATGC
CCCATCAACACAAAATAACGACCTGAAAACTGCCCCGTCTGCTCAATGGCGTAAATGTCCGCCGGACTCTCCACCACGCAGATTTGACCGTTTTCCTGAC
GACGTGGATTCGAACAGATGTTACAGACTTCCTGTTCGGTGAAGGTGCGGCAATCGGCGCAGTGGCCGATTTCCGACATCGCCCGGGTGAGCGCCTGCGC
CAGACGCATCCCGCCGCTACGATCGCGCTGAAGCAGCGTGAACGCCATACGCTGCGCCGACTTCGGGCCAACGCCCGGCAGACAGCGCAGTGCTTCCATA
AGCTGTGTTAACAGCGGGCTGGTTTGCATCAGAACGGCATCTTAAAGCCAGGCGGCAGCTGCATTCCGGAGGATACAGAGGCCATTTTTTCTTTCTGCGT
TTCTTCAATACGACGTGCTGCGTCGTTGAATGCTGCAGCCACCAGGTCTTCCAGCATCTCTTTGTCGTCTTCCAGCAGGCTCGGGTCGATCTCTACGCGA
CGGCAGTTGTGTGCACCGTTGATGGTCACTTTTACCAGACCTGCGCCAGATTCGCCGGTGACTTCCAGCTGCGCGATCTCTTCCTGCATTTTCTGCATTT
TTTCTTGCATCTGCTGGGCTTGCTTCATCAGGTTACCCAGACCGCCTTTACCAAACATAGGTTTCTCTCTCAATCACGTTAAGGATGACGAACGTAAGCT
GTGCTTACGATCAAATGGGGCGGATACTTTCTTCATCCAGCTCCGCATCGAAGAATCGACGCAGGGTCTGAATATTATTATCCGCAATAATGGACTCGCG
CGCCTGCGCAAGTTTTTCTTCGTATATCGCCTGACGCCATTCCAGCGGCGTACGCACCGCGGGATTATCATCTTCAACGATAGTCAGTTCAACCGTTGAA
CCTTTTAACGTGCTCAACGCTTCAGCCAGTTTTTGCTGTGCGCCGCGGTTGTTCAAATGCCGCTGAGAGGAGCGCAAATGCAGACATACTGCGTTGTCGC
TCTCCTCTTTCCAGGCATTTAACGCCACCTGTTCGACCAGTTTTGGTAGCGAAAGTTGACTCACCTGAGCCGCCCACGGGTCGCGCTCAATGGCTTCTGC
CGCCAGCTTCGCCGCCAGTTCCGGCGTTTTTTCATGTTCCAGCGCTTTTTTCAGCGCCTTCGGCGTGGCGACCACTTCTTTTTGCTGCATCACTGGAGTG
GTCGCCTTCCAGCGATACGCTTCTTTTTTGGCTGGCGCTTTTTCCAGCGCCGATGGCACCGGGCGCGCCTGAACGCGATCGGTGACCGAAGCCAGTCTTT
CCAGCGCAGCGTTATTCACCGGCCGCGCGCGGGTAGCGGCTGCCGGTTCACTCTTTTTTGCTTTGGTTGCTCCCTGCACGCGCTGCAACTGCTGGCGCGC
CGCCAGCACCTGGCTGGTGGTTTCCGGGAGCGGTACAGTCGGTGCCTGCTGCAGCGCTGATTGCGGTTGCGGCGGCACCTGTGTTGGCGTCATTACTGCC
GTTGGCGCAACGGGCGCAAAGGACTGGCGTGGCACTTCTGGCTCAGGCAGAGGCATACGCGGATGGAACGCCAGCGCGCGCAGCAGCGTCATCTCAACAC
CCATACGGCGGTCTGGCGCATACGGTAATTCTTTGCGACCAATCAACAGCGTCTGATAGTAAAGCTGAATATCCGTCGGCGGTATGGTGCGCGCCAGTTC
ACGCATCCGCAGCTCAATGGCGGCCATGTCGTTGCCAAGAGCAGCAGGCGAAAGTTGTACCATCGCAATACGATGCAACAGACCGAGCATTTCCACCAGC
AACGCTTCCCACTCGATACCACGGGCAGCAGCTTCATTAATTAGCGCCATTACGCGCTCGCCGTTGGCCTCGACCATCGCTTCAACCAGCGATAACGCCT
GATCGTCGTCAAGCGTACCCAGCATCGCACTGACCGCCTGGGTTGAAACCTGGCCGTCACCGCTGGCAATCGCCTGGTCGGTCAGACTTAAGGCATCTCG
CAGGCTGCCTTCAGCGGCGCGTGCCAACAATTGCAGCGCCCGCGGCTCGTGAGCGATATGTTCTTCGTTGAGGATGTGCTCAAGCTGATGGCGAATTTGC
TCGACATCCAGCGCCTTGAGATGAAATTGCAGACAGCGTGACAAAATCGTCACCGGCAATTTCTGCGGATCGGTCGTCGCCAGCAAAAACTTAACGTGCT
CTGGCGGCTCTTCAAGGGTTTTTAACAGTGCGTTAAAGCTGTGACGCGACAGCATATGCACTTCGTCGATGAGATAAACTTTGAAACGACCACGCGCCGG
AGCGTACTGAACGTTATCCAGCAGGTCGCGGGTATCTTCGACTTTAGTGCGCGAGGCGGCGTCGATTTCAATCAGATCGACAAAGCGCCCCTGCTCGATT
TCACGACAGTTATCGCACACGCCGCACGGCGTCGCGGTAATGCCGGTTTCGCAGTTTAGCCCCTTCGCCAACAGTCGGGCGATAGAGGTTTTTCCGACGC
CACGGGTGCCGGAAAAAGATAAGCATGATGAATACGCCCTAACGACAAGCCGTTCGCCAGTGCGGTCAGCACATGTTCCTGGCCGACGACGTCAGCAAAG
GTTTGTGGGCGCCATTTTCGGGCTAAGACCTGATAACTCATTGGCAGGCTCTGAAACGCTGGAAGGTGGATTCACGAAGGGGTAATGCTAACACAGCCCC
GTCAGAACGGCGAGGCTGAATGCACATCTTGTGCTGCCCGTAGCGTGAGCAGCGCAAGACTGACGATAATTAATGGCCCGGGAACGGGACAAGGCTGTAG
CTGGTAATGCCCTGTTTTTCGAGACGCTGTTCACCGCCGAGATCGAACAGGTTGATAATGAACGCAGCGTCAGCTACTTCACCACCCAGACGACGGATCA
GTTTAACGGTCGCTTCGATAGTGCCGCCGGTTGCCAGCAGATCGTCCACCACCAGAACTTTATCGCCCGGTTTGATGGCATCAACGTGGATTTCCAGCTG
ATCGGTGCCGTATTCCAGGTCGTAAGTTTCACTGATGGTTTCACGCGGCAGTTTGCCCGGTTTACGGACCGGTACAAAGCCAACGCCCAGACCCAGAGCT
ACCGGAGCGCCAAACAAGAAGCCACGCGCTTCGGTGCCGACCACTTTGGTAATGCCCGCATTTTTGTAACGCTCAACCAGCAAGTCGATGCTGAGAGCGT
AAGCTTTCGGGTCTTCCAGTAAGCTGGTGACATCGCGGAAAAGAATGCCGGGTTTTGGGTAGTCCTGAATGCTTTTGATGCTATTTTTGAGATACTCAAG
CTGCTGTGCAGTCGCGGTCATAAGTGTATGCCTGCTTGTTACGGTGGTACTCACGGCGCGTTTTGAACGTATCAAAAGTAACAGTTGTTTAACCTTTGAC
CGCCTGCGCCTGTGCTCGAAAACGCCAGAATGTACTGGCTGTACGCAATAATTGCAACTGCGATTGTTGTGCTTCAGTGCTTTTCTTGCTTTTCATCAAT
CACCGGAATTCGCCACATATAAAAAAGCAAACAGGCGAGAATTACCAGCAACATGATGCGCACCCACGGCATCTGGACGAACCACAGCGAAATCGTAAAC
GTAATCAAAATAAGCAAAATCGCCCGTGGTTTTGCGCCGCGCGGCATCGCATGATGTTTCTGCCAGAAACGTAGATAACTGCCAAACCATGAGCGGTACA
GCAACCAGGCGTGAAAGCGCGGGGAAGAACGGGCAAAGCACCAGGCCGCCAGCAGGATAAACGGCGTCGTCGGTAATACCGGTAATACCACGCCTAGCGT
ACCCAGCACTACCGCCAGCCAGCCAATGATGATTAAAATGATTCGTTGCATATTGAGTGTTGTCAGCTTACAGAGTGGCTACTTTAGCATAACAATTATC
ATTTTCATTGAGGTCTTATCGTGAAAACCACCCTGCTACTGGAAAAACTGGAAGGACAGCTCGCCACGCTGCGTCAGCGTTGTGCCCCGGTAGCGCAATT
TGCCACGCTAAGTGCCCGTTTTGACAGGCACCTTTTTCAGACCCGTGCGACAACACTACAGGCTTGTCTCGATGAGGCGGGCGATAACCTGGCTGCGCTT
CGTCATGCGGTTGAGCAGCAACAGCTGCCGCAAGTCGCCTGGCTGGCAGAACATCTGGCGGCGCAACTGGAGGCTATAGCGCGTGAAGCCACAGCCTGGT
CGCTACGCGAGTGGGATAGCGCACCACCGAAAATTGCCCGCTGGCAGCGTAAACGTATTCAGCATCAGGATTTTGAGCGGCGGCTACGTGAGATGGTTGC
CGAACGTAGAGCCCGTCTGGCGCGAGCGACCGCTCTCGTGGAACAGCAGACACTGCATCGTGAAGTGGAAGCCTATGAAGCGCGCCTGGCACGCTGCCGC
CATGCGCTGGAAAAAATCGAAAACAGGTTAGCGCGTTTAACCCGCTAGCAATGGAGAGAGTATGTCACTGGAAAATGCCCCTGACGATGTCAAACTGGCC
GTCGATTTGATTGTGCTGCTGGAAGAAAATCAGATCCCAGCCCGCACCGTACTGCGCGCGCTGGATATTGTAAAACGCGATTATGAAAAGAAATTAACGC
GCGATGATGAGGCGGAAAAGTGAGAAATAAATGGGGCCGCTAAATGTCCCCTAAGATTGTGGGCAAACGCAAAACTGCCTGATGCGCTACGCTTATCAGG
CCTACACCGCTCCTGCAATATATTGAATTCTTGCGGTTTCGTAGGCCGGATAAGGCGGTCACGCCGCATCCGGCATGAACAACGCGCACTTTGTTAGTAA
TCTCGGGGCAACTAAATGTCGCCCCCTTTGGTTATTACCCTACCGCTGGCGTCGGATCGTCGCCTTTGTAGTCGCGTTTCACTTCCGTCACTTCATCGCC
CTTCTCGTTGTGCAGATGCACTTCAAGCTGGTTAAAGGCAATGTTGATGTCGTTTTCACGGCACAGCTGATCGATAGTACGGTTCAGCTCATCGACAGTA
CGGCTACGGTCACGCAGTTCACGCACATACAGACGCAGCTCATGATCCAACGTGCTGGCACCAAATGCCGTAAAGAAGACTTCCGGCATTGGTTCGTGCA
TCACCCTTGGGTGCTCAGTCGCCGCCTTCAGCAACACTTTACGCACTTTTTCCAGATCGGAGCCATAGGCTACGCCGAGACGGATCACCAGACGCGTAGT
CGTGTCAGTCAACGACCAGTTGATCAGACGCTCGGTAACAAACGCTTTGTTCGGGATAATCACTTCTTTGCGATCGAAATCGGTAATCGTTGTCGCACGA
ATACGGATCTTGCTGACCGTACCCGAGAAGCTACCAATGGTTACCGTGTCGCCTATGCGCACCGGACGTTCGAACAGAATGATCAAACCGGAAACGAAGT
TACCGAAGATCTCTTGTAAACCAAAACCAAGACCTACGGATAATGCTGCCGCCAGCCACTGGAGTTTATCCCACGAGACGCCCAGCGATCCGAACACCGT
CATCGCACCAACGGCAATAATGATGTAGTTAAGGATGGTAGTAATGGCATACGACGCGCCCTGGCGCATATTCAGTCGCGAGAGCACCAGCACTTCCAGC
AAACCAGGCAGGTTGCGAATCAACGCCCAGGCCACCATTGAGGCGATAATCGCAAACAACAGACTGCCCATGGTGACGTTTTTCACCACCGCAGCACCAG
CTTCAGTAGCGTTGTAATGCCAGAGCGTAATGCTGTCGAGATAGCTGAACACGGTGATCAAATCAGACCAAATTGCCCAGAACATGACACCGAACAGCGC
AAACATCAGCAACATGGTAATACGCAGCGTCTGCTGGTTAACCTGCTCCAGCGCAATGGTGGGTTCTTCCGGCGGTTCGGCACCTTCTGCGCCCTCTTTC
ACCAGATTCTGCCGACGCGCCAGTGCACGACGCCAGGCGATACGCCGCGCCGCTACGCTTAAGCCGCGCAATACCGTCTGGTACAGCAGGTTCCAGATGA
TCACCAAATAAACGGTTTCAATCCAACGCCCGGAGAGGCGCAGCGTGGTGTAGAAGTAACCCGTGGCGGTCAGCACCATCAACGCAATCGGGATAATCGA
CAGCACGGTAATGGTGACCAGTCGCATGGTGTGCGACTCTTTATCACGCCAGCTTTCGCGGCACATCGGCCACACCAGGAAGGCAATCAGCAGCAGGTTG
AAGAAAATCATCGCCTGCCCCAGCACATCATCCATCAAATGCAGCGGGGAGAGTTCTGCCACCACAGACCAGAAATGGATCGGCAGCAACGCGAGGCTGA
TGCGGACAATTTGCCGACGCCAGTGGCTGGTCTGCTGTTCCGGCATACCAAAGTGACGCACGGCAACACCATTTTTCTCCAGCACTTTCCAGCACAGGCC
AAATACCAGCCAGAAAATCGCCAGTTTTTTGCTGAACGACCACAATAACTCGCTGATATTGAGCTGCATAGTCAGCAGAATCAGGCCGACAGCGAGAATA
ATCAGGCACACCGGCAGTGCGCGGATCAGGTCGATAAGGATCGCTTTTGGTGTGTTGAGCTGGCTGTCGTTACGCAGGGAACCCACAGCGGAAGCCAGTT
TTTGTTGATACGCTTTCAGCCAGCCCAGACGCCAGTGGATCAGCCCGGCAATCAACAGCAGCGGCAAACCAGCGAGGAAGGCGATGAATACGGCGGGCCA
GGCTTTTTCCCAGTTCACCGTGATTTTCATCGACTTAAATTCATCTTTCAGCGTTTGCGGGAACGCTTTAATCCAGTCCCAGTCCATCGGGCGGTTACTG
TTCACCCAAAAAATTTGCTGCGTCAGGATGGATTTCAGGTTTTTCGACACACTCATTAACTGCTGCTGGTTGATTTGCAGGTTAATGGCCATCATCAGCT
GGTTACCCAACTGTTTGTTAAGCTGATCCAGCAATTCGCGACGCATATCAACTACTTGCAATAATGCATCGTGAACTTCGCTGTTGACTTCGTTGGTGTG
ACCTTCTTCCAGTTTGCTGACGAACGCATCGCTCTGGAACAGCGCGTCACGCTGCTGGTTGACTTCAAACTGTTCGAGACGCAAATCCGCGATGCGGTTG
GTCATGTTTTCCAGTTCATCTGCCGAGGGGAGTGTTTGTTGTTGCTGGTACAGGATACGTGACAACAGCAGACTGCCCTTCAGAACGGCAATCTGCTCCT
TAATATTACGTTCCGATTGCAGCGCACGCTCCAGCCAGTTTTTGACTTTAATGTTTTGCTGCATCAACTGATTACCGTTTTGAGTCGCGGTAATCAGACG
CTGACTTAACTGCTGGTTAATTTCCAGTTCCTGCTTCACCAGCGGATTAGCCTGAATACGCGCGGCTTCATCCGGGGAGACAGCTTCCTGCGCCGTTTTT
TCGGTTAAAGTCAGGCGCTTGCTGTTTACCGCTTCTTGCAACAGTTGTAACTGGTGCTCCAGACGGGCGCTGTTCGCCGTCACGTAATCACGCTGCTTTT
GCAAGGTATCCTGCAAGACAGTGTTCCCTTCCAGGCTTTTACGCTGCTGGTCAATCTCGGCATTCAGCAAAGCCTGCTGGACCTGCATTAACACTTTCTG
GCTGGGACGTAAGGCAGTCTCGCCGACATCAGTCCCATCCAGACGACTGCGAATTTGTTGCAGCTGCTGCGAAGCGTTATACATCGCATTTTGTACGCGT
TCGGGCTGCGTCTGTAGCGAAACCAGTTGGCTGTTATAAGACGCCAGATCGTTTTGTGCGTTTTGCAAATCGTCCAGCGCCTGGGCAACGCGAGTTTCCA
GCTGGCGCAACGAAAGCGTGCTCAGAATTTTGCGCGTTTCTTCGTCGTTATCGACATCACTAAGTGCTGTTAACGCCGCGGTCGCCTGGCGCATTTTTTC
CGGCGCTTCAGCGACTTTTTGCCGTAGCTGAACTGTCTCTTCTTTTACGCGATCGATTTTATCGAGGGTGGCTAATGTATCTGTCAGATCCTGCTGCACC
AGTTTGTCCTGAGCAGAAAGATCTTTTTGTTTATTCAGTGAGTCAAGTTGTGCCTGCAGGTCCGCTTTTGTCGGTAAATCACCATTCGATGACGCCCGTG
CAAACGCCGTGTTCTGGCATAACAAGACAAAAACAAAAGCAATAAATGCTGAAAAACAAAATGCCGTGATCGTTTGTAATACTGGAACATAGTCATGATG
AATGAAGGTTTCTGAACCTGAAGAACGACCTGAAAAAGTCAAACCGCAAGAATATCACGACGCAGTGAACCAGAATAGCAACGACGAAAATGTCCAGGAA
AATTCCTGGAGTCAGATTCAGGGTTATTCGTTAGTGGCAGGGTTACGAAGCGTGGGGCACAGGAGATACATCTCCAGTAAGATGGCGACGTAATCGCGGG
CTTCTTTTTAAGATCAAAAGATTGCGGGGCAAAGAGCCAGTTTTCCATCAGGCCGGAAATATAGCCGCGCATAATAATTGCTGCGCGACGCGTCATTAAA
TCCGCAGGCAACATTTTCGCTTCAATACAATGTCTTAACGTTTGTTCTATACGGTCATAACTTTCCAGACAGAGATTACGTTGTGCCTGTTGCACAACAG
CCATTTCTCCGACAAATTCGCATTTGTGGAATATAATCTCCATCAATAATCGACGCCGTTCTTCTGTCACCGTGGACTCAAGAACATGAATTAATATCTC
TCTTAATACTGAGAGTGGATCGCCAGGGAATTTTGCCTGATACTCAAGCTCTAGTTCACCAATATTGGATTCTGACAGTTCCCAGATCTCACTGAACAAA
TCCGACTTGTCTTTAAAATGCCAGTAGATTGCACCGCGCGTAACGCCAGCTGCTTTTGCAATCTCACCCAGCGAGGTGGATGATACCCCTGCTGTGAGAA
AAGACGTAGAGCCACATCGAGGATGTGTTGGCGCGTTTCTTGCGCTTCTTGTTTGGTTTTTCGTGCCATATGTTCGTGAATTTACAGGCGTTAGATTTAC
ATACATTTGTGAATGTATGTACCATAGCACGACGATAATATAAACGCAGCAATGGGTTTATTAACTTTTGACCATTGACCAATTTGAAATCGGACACTCG
AGGTTTACATATGAACAAAAACAGAGGGTTTACGCCTCTGGCGGTCGTTCTGATGCTCTCAGGCAGCTTAGCCCTAACAGGATGTGACGACAAACAGGCC
CAACAAGGTGGCCAGCAGATGCCCGCCGTTGGCGTAGTAACAGTCAAAACTGAACCTCTGCAGATCACAACCGAGCTTCCGGGTCGCACCAGTGCCTACC
GGATCGCAGAAGTTCGTCCTCAAGTTAGCGGGATTATCCTGAAGCGTAATTTCAAAGAAGGTAGCGACATCGAAGCAGGTGTCTCTCTCTATCAGATTGA
TCCTGCGACCTATCAGGCGGCATACGACAGTGCGAAAGGTGATCTGGCGAAAGCCCAGGCTGCAGCCAATATCGCGCAATTGACGGTGAATCGTTATCAG
AAATTGCTCGGTACTCAGTACATCAGTAAGCAAGAGTACGATCAGGCTCTGGCTGATGCGCAACAGGCGAATGCTGCGGTAACTGCGGCGAAAGCTGCCG
TTGAAACTGCGCGAATCAATCTGGCTTACACCAAAGTCACCTCTCCGATTAGTGGTCGCATTGGTAAGTCAAACGTGACGGAAGGCGCATTGGTACAGAA
CGGTCAGGCGACTGCGCTGGCAACCGTGCAGCAACTTGATCCGATCTACGTTGATGTGACCCAGTCCAGCAACGACTTCCTGCGCCTGAAACAGGAACTG
GCGAATGGCACGCTGAAACAAGAGAACGGCAAAGCCAAAGTGTCGCTGATCACCAGTGACGGCATTAAGTTCCCGCAGGACGGTACGCTGGAATTCTCTG
ACGTTACCGTTGATCAGACCACTGGGTCTATCACCCTACGCGCTATCTTCCCGAACCCGGATCACACTCTGCTGCCGGGTATGTTCGTGCGCGCACGTCT
GGAAGAAGGGCTTAATCCAAACGCTATTTTAGTCCCGCAACAGGGCGTAACCCGTACGCCGCGTGGCGATGCCACCGTACTGGTGGTTGGCGCGGATGAC
AAAGTGGAAACCCGTCCGATCGTTGCAAGCCAGGCTATTGGCGATAAGTGGCTGGTGACAGAAGGTCTGAAAGCAGGCGATCGCGTAGTAATAAGTGGGC
TGCAGAAAGTGCGTCCTGGTGTCCAGGTAAAAGCACAAGAAGTTACCGCTGATAATAACCAGCAAGCCGCAAGCGGTGCTCAGCCTGAACAGTCCAAGTC
TTAACTTAAACAGGAGCCGTTAAGACATGCCTAATTTCTTTATCGATCGCCCGATTTTTGCGTGGGTGATCGCCATTATCATCATGTTGGCAGGGGGCTG
GCGATCCTCAAACTGCCGGTGGCGCAATATCCTACGATTGCACCGCCGGCAGTAACGATCTCCGCCTCCTACCCTGGCGCTGATGCGAAAACAGTGCAGG
ACACGGTGACACAGGTTATCGAACAGAATATGAACGGTATCGATAACCTGATGTACATGTCCTCTAACAGTGACTCCACGGGTACCGTGCAGATCACCCT
GACCTTTGAGTCTGGTACTGATGCGGATATCGCGCAGGTTCAGGTACAGAACAAACTGCAGTTGGCGATGCCGTTGCTGCCACAAGAAGTACAGCAGCAA
GGGGTGAGCGTTGAGAAATCATCCAGCAGCTTCCTGATGGTTGTCGGCGTTATCAACACCGATGGCACCATGACGCAGGAGGATATCTCCGACTACGTGG
CGGCGAATATGAAAGATGCCATCAGCCGTACGTCGGGCGTGGGTGACGTTCAGTTGTTCGGTTCACAGTACGCGATGCGTATCTGGATGAACCCGAATGA
ACTGAACAAATTCCAGCTAACGCCGGTTGATGTCATTACCGCCATCAAAGCACAGAACGCCCAGGTTGCAGCTGGTCAGCTCGGTGGTACGCCGCCGGTG
AAAGGCCAACAGCTTAACGCCTCTATTATTGCTCAGACGCGTCTGACCTCTACTGAAGAGTTCGGCAAAATCCTGCTGAAAGTGAATCAGGATGGTTCCC
GTGTGCTGCTGCGTGATGTGGCGAAAATTGAGCTGGGTGGAGAGAACTACGACATCATCGCAGAGTTTAACGGCCAACCGGCTTCCGGTCTGGGGATCAA
GCTGGCGACCGGTGCGAACGCGCTGGATACCGCTGCGGCAATCCGTGCTGAACTGGCGAAGATGGAACCGTTCTTCCCGTCAGGTCTGAAAATTGTTTAC
CCGTATGACACCACACCGTTCGTGAAAATCTCTATTCACGAAGTGGTTAAAACACTGGTCGAAGCGATCATCCTCGTGTTCCTGGTAATGTATCTGTTCT
TGCAGAACTTCCGCGCGACGTTGATTCCGACCATTGCCGTACCGGTGGTATTGCTCGGGACCTTTGCCGTCCTTGCCGCCTTTGGCTTCTCGATAAACAC
GCTAACAATGTTCGGGATGGTGCTCGCCATCGGCCTGTTGGTGGATGACGCTATCGTTGTGGTAGAAAACGTTGAGCGTGTGATGGCGGAAGAAGGTTTG
CCGCCAAAAGAAGCCACCCGTAAGTCGATGGGGCAGATTCAGGGCGCTCTGGTCGGTATCGCGATGGTACTGTCGGCGGTATTCGTACCGATGGCCTTCT
TTGGCGGTTCTACTGGTGCTATCTATCGTCAGTTCTCTATTACCATTGTTTCAGCAATGGCGCTGTCGGTACTGGTGGCGTTGATCCTGACTCCGGCTCT
TTGTGCCACCATGCTGAAACCGATTGCCAAAGGCGATCACGGGGAAGGTAAAAAAGGCTTCTTCGGCTGGTTTAACCGTATGTTCGAGAAGAGCACGCAC
CACTACACCGACAGCGTAGGCGGTATTCTGCGCAGTACGGGGCGTTACCTGGTGCTGTATCTGATCATCGTGGTCGGTATGGCCTATCTGTTCGTGCGTC
TGCCAAGCTCCTTCTTGCCAGATGAGGACCAGGGCGTATTTATGACCATGGTTCAGCTGCCAGCAGGTGCAACGCAGGAACGTACGCAGAAAGTGCTCAA
TGAGGTAACGAATTACTATCTGACCAAAGAAAAGAACAACGTTGAGTCGGTGTTCGCCGTTAACGGCTTCGGCTTTGCGGGACGTGGTCAGAATACCGGT
ATTGCGTTCGTTTCCTTGAAGGATTGGGCCGATCGTCCGGGCGAAGAAAACAAAGTTGAAGCGATTACCATGCGTGCAACACGTGCTTTCTCGCAAATCA
AAGATGCGATGGTTTTCGCCTTTAACCTGCCCGCAATCGTGGAACTGGGTACCGCAACCGGCTTTGACTTTGAGCTAATTGACCAGGCTGGCCTTGGTCA
CGAAAAACTGACTCAGGCGCGTAACCAGTTGCTTGCAGAAGCAGCGAAGCACCCTGATATGTTGACCAGCGTACGTCCAAACGGTCTGGAAGATACCCCG
CAGTTTAAGATTGATATCGACCAGGAAAAAGCGCAGGCGCTGGGTGTTTCTATCAACGACATTAACACCACTCTGGGCGCTGCATGGGGCGGTAGCTATG
TGAACGACTTTATCGACCGCGGTCGTGTGAAGAAAGTTTACGTCATGTCAGAAGCGAAATACCGTATGCTGCCGGATGATATCGGCGACTGGTATGTTCG
TGCTGCTGATGGTCAGATGGTGCCGTTCTCGGCGTTCTCCTCTTCTCGTTGGGAGTACGGTTCGCCGCGTCTGGAACGTTACAACGGCCTGCCATCCATG
GAAATCTTAGGCCAGGCGGCACCGGGTAAAAGTACCGGTGAAGCAATGGAGCTGATGGAACAACTGGCGAGCAAACTGCCTACCGGTGTTGGCTATGACT
GGACGGGGATGTCCTATCAGGAACGTCTCTCCGGCAACCAGGCACCTTCACTGTACGCGATTTCGTTGATTGTCGTGTTCCTGTGTCTGGCGGCGCTGTA
CGAGAGCTGGTCGATTCCGTTCTCCGTTATGCTGGTCGTTCCGCTGGGGGTTATCGGTGCGTTGCTGGCTGCCACCTTCCGTGGCCTGACCAATGACGTT
TACTTCCAGGTAGGCCTGCTCACAACCATTGGGTTGTCGGCGAAGAACGCGATACTTATCGTCGAATTCGCCAAAGACTTGATGGATAAAGAAGGTAAAG
GTCTGATTGAAGCGACGCTTGATGCGGTGCGGATGCGTTTACGTCCGATCCTGATGACCTCGCTGGCGTTTATCCTCGGCGTTATGCCGCTGGTTATCAG
TACTGGTGCTGGTTCCGGCGCGCAGAACGCAGTAGGTACCGGTGTAATGGGCGGGATGGTGACCGCAACGGTACTGGCAATCTTCTTCGTTCCGGTATTC
TTTGTGGTGGTTCGCCGCCGCTTTAGCCGCAAGAATGAAGATATCGAGCACAGCCATACTGTCGATCATCATTGATACAACGTGTAATCACTAAGGCCGC
GCAAGCGGCCTTTTTTATACATAACCTACGAACATTAAGGAGTATTGAACCACCAACTCAGGATCCCATACGAAAACCAGTATTAACCCCGCATAAAATT
CATAAAAAATACTGATTGTTAGTTAATTTATATTAAGTAGCGCTAATAGATTTAATAATCCATAACCATTTAGAGGCTATTCTTAATTATTTGCGGTAAT
TCTTTATTCATTCCTCGGTTATTACGTCATATTCAGAGCAATCCTGGTATTAGTGTCACCGATTTCTTCTGGCGATAATTCTGAAATGTTATGAACAGTT
CGAGCAAACTGCTTTTACCTGCTGCGGGTTGGTGCTAGTATGAAAAAGTGAGTCCTGTCCCGCTTCCTTCCTAATTGTAATTTTTCGTAATAATGCGATG
AAAACCTACAAAGAGTGGCTTATAGTTAAGCTAACAAACGAGAGGGCAAGTCCAGGTCAGTAAGTTTTTTCCATCCCGAAAGGTGTCCGTTAGTTCAACC
GCTAAGAAGGGGACGCGTTATGGATGAATACTCACCCAAAAGACATGATATCGCACAGCTTAAGTTTCTCTGTGAAACCCTGTATCATGACTGCCTTGCA
AACCTTGAAGAAAGCAATCATGGCTGGGTTAACGACCCAACCTCGGCGATCAACCTCCAGTTGAATGAACTGATTGAGCATATTGCGACCTTCGCACTTA
ATTACAAAATTAAGTATAATGAAGACAATAAGCTCATTGAGCAGATCGACGAATATCTGGATGACACCTTTATGTTGTTCAGTAGTTATGGTATTAATAT
GCAGGATCTTCAGAAATGGCGGAAGTCAGGTAATCGACTATTCCGTTGTTTTGTCAATGCGACGAAAGAGAATCCTGCGAGTTTATCTTGTTAGAATTAT
TACAACCATGGGTAGAAGTATGTCCGAAAAACCTTTAACGAAAACCGATTATTTAATGCGTTTACGTCGTTGCCAGACAATTGACACGCTGGAGCGTGTT
ATCGAGAAAAATAAATACGAATTATCAGATAATGAACTGGCGGTATTTTACTCAGCCGCAGATCACCGCCTCGCCGAATTGACCATGAATAAACTGTACG
ACAAGATCCCTTCCTCAGTATGGAAATTTATTCGCTAATAAATAACTCGCTTTCGGAGCTATAACTGGCTGTTTATTAAGAATTTTGCACTTTTTTCGCC
ATGAAGACATACCCTATGTGATCTTCATCACACAGATGTAATGGGAACGTTCTCTTCACTGACTTTTCGTCTTACTGTGTTGCCGCATTTTCAGCAACCG
GAAGTCAGTAATGAGCACAGAAAAAGAAAAGATGATTGCTGGTGAGTTGTATCACTCGGCAGATGAGGCGTTATCTCGCGATCGCCTGCGAGCTCGTCGG
CTTATTCACCGATACAATCATTCCCTGGCGGAAGAGCACACATTACGCCAGCAAATTCTTGCTGATTTATTCGGTCAGGTGACAGAGGCTTATATTGAGC
CAACGTTTCGCTGTGACTATGGCTATAACATTTTTCTCGGCAATAATTTTTTCGCCAACTTCGATTGCGTGATGCTTGATGTCTGCCCTATTCGCATTGG
TGATAACTGTATGTTGGCACCAGGCGTTCATATCTACACGGCAACACATCCCATCGACCCTGTAGCACGTAATAGCGGTGCTGAACTGGGGAAACCCGTC
ACCCATCGGTAATAACGTCTGGATTGGCGGACGCGCGATCATTAACCCTGGTGTGACCATTGGTGATAACGTCGTGGTAGCCTCAGATGCAGTTGTCACA
AAAGATGTCCCGGACAACGTTGTCGTGGGCGGTAATCCAGCCAGAATAATTAAAAAATTGTAATCGGTTTTTCGCAACTGTTATGCAAAATTGTGGTAAA
TCTGTTACTTCCCCTCTACTATTCCCACGTTAAAATAGGGTGTTCCCTGGAAAGTTGCAGATACCACGAAGGCAAACGATGACCGAAATACAACGCCTGC
TGACTGAAACAATTGAGTCTCTAAATACCCGCGAAAAACGCGACAACAAACCCCGCTTTAGTATCAGTTTTATCCGTAAACATCCGGGGCTGTTTATCGG
TATGTATGTTGCTTTTTTTGCCACCCTGGCGGTGATGTTGCAGTCCGAAACGCTTTCAGGCTCTGTCTGGCTACTGGTTGTATTATTTATCCTGCTTAAT
GGTTTCTTCTTTTTCGATGTCTACCCACGCTACCGCTATGAAGATATCGACGTGCTGGATTTCCGCGTTTGCTATAACGGCGAATGGTACAACACGCGCT
TTGTACCTGCCGCGCTGGTTGAAGCCATCTTGAACTCTCCGCGTGTCGCGGATGTTCATAAAGAACAACTGCAAAAAATGATCGTCCGTAAAGGTGAACT
GTCTTTTTACGATATTTTTACCCTCGCTCGCGCCGAATCAACATCTTAAGTTAGGGTTACATACCAGGCGTAAAGCTCTGCGCCTGGTCAAATGACAACG
TTCGTTTCCACCCATCCCTTCATGAAATCCCGGCTCTACCTCCTTATCTCCTGCCAGCCTTTTTCCACAATCAGATATACTTTCCCTACACTGTGTTAAT
AAGGATATGCTGGTGAGAACACGACATCTGGTCGGCCTTATTTCGGGAGTACTGATTCTTTCAGTATTGCTGCCTGTCGGCTTAAGCATCTGGCTGGCCC
ATCAGCAGGTAGAAATATCATTTATTGAAGAGCTGAATACGTATTCCTCCCGCGTCGCTATTCGGGCCAATAAGGTGGCGACACAAGGGAAAGATGCGCT
GCAAGAGCTGGAAAGATGGCAAGGCGCTGCCTGTAGCGAAGCCCATCTCATGGAAATGCGTCGGGTATCTTACAGTTATCGCTATATTCAGGAAGTGGTT
TATATCGATAACAACGTTCCCCAATGTTCGTCTCTGGAGCATGAAAGCCCGCCCGATACCTTCCCCGAGCCAGGTAAAATTTCGAAAGATGGTTATCGTG
TCTGGTTAACATCGCATAACGATTTAGGCATTATTCGTTACATGGTCGCCATGGGAACGGCACATTATGTCGTCATGATCGACCCCGCTTCCTTTATTGA
TGTCATTCCCTATAGCTCATGGCAAATTGATGCCGCCATTATTGGCAATGCCCATAACGTTGTCATAACCAGCAGCGATAAAATTGCTCAGGGAATTATT
ACCAGGCTACAAAAAACACCCGGTGAGCATATCGAAAATAATGGAATCATTTACGATATCCTGCCCTTACCGGAGATGAATATTTCGATCATCACCTGGG
CTTCAACGAAAATGTTGCAGAAAGGCTGGCATCGGCAAGTCTTTATTTGGTTACCGCTCGGGTTGGTGATTGGCCTGCTGGCAGCGATGTTTGTGCTGCG
TATTTTGCGCCGTATCCAGTCACCGCATCATCGGCTGCAGGATGCTATCGAAAATCGTGATATTTGCGTGCACTATCAGCCGATTGTCTCCTTAGCCAAT
GGCAAAATTGTCGGTGCTGAGGCACTGGCGCGCTGGCCGCAGACAGACGGTAGTTGGTTGTCACCAGATAGTTTTATTCCGCTGGCACAGCAAACGGGCC
TTTCTGAGCCATTGACGCTACTGATTATAAGAAGCGTCTTTGAAGATATGGGCGACTGGCTGCGTCAGCATTCTCAGCAGCATATTTCGATCAATCTTGA
ATCCACCGTGCTCACCTCGGAAAAAATCCCGCAATTGCTGCGTGAAATGATCAATCACTATCAGGTTAATCCCAGACAGATCGCGCTTGAACTCACTGAA
CGCGAGTTTGCCGATCCGAAAACCAGCGCCCCGATAATTTCTCGCTACCGGGAGGCGGGCCATGAAATTTATCTCGATGATTTTGGTACAGGGTATTCAA
GTTTAAGCTATTTACAGGATCTGGATGTCGACATTCTGAAGATCGATAAATCTTTCGTTGATGCGCTGGAATATAAAAATGTCACGCCGCATATCATCGA
AATGGCAAAAACACTGAAACTGAAAATGGTTGCGGAGGGAATCGAAACCAGTAAACAAGAAGAGTGGCTACGCCAGCATGGCGTGCACTACGGTCAGGGC
TGGCTCTACAGCAAGGCATTACCGAAAGAGGATTTCTTACGCTGGGCCGAGCAACATTTGTGAATTTTAGGGCTGACGGCACGCCGCACAGCCCGTCACG
CTACCTACTCGTCGATGATTGATTCGAATCCACCATAGATCATTCGCTTGCCGTCAAACGGCATGGACTCGCCGAACTCTTTCATCCGTGGGTCCGACAT
CATCTTTTGATTAGCAGCGTCGCGGACCTCTTTTGAAGGGTATTCAATCCAGCTAAAGACAACCTCTTCATTCTCTTCCGCTTTCACCGCCATACGAAAA
TCGGTCACTTTACCATCCGGTACATCGCTGGCCCAGCATTCGACAATACGAAGCGCGCCAAACTCTTTAAACAATGGCGCGGCCTTAGCGGCCATTTCCC
GATAGGCATCCTTTTTATCGGCAGGAACGGCAACCACAAAACCATCAACATACTTCATCAGACATACCTCCGAAGCGTACTGCGCAGCCAGACAATTCTT
GCGACGTCAGTTGTGGTTAAAGTTTAGCCATGTTGGGATTTTTGACGAAACGGTGGGAGGCAGAAATGGGTGGGGGCCCTGCCAGCTACATCCCGGCACA
CGCGTCATCTGCCTTGGCTGCTTCCTTCCGGACCTGACCTGGTAAACAGAGTAGCGTTGCGGGAGAACCAACAGAGCCCCCATTGAGAGCGTTGAGAACC
AACGCGCAGGCGCATTATCACTGCTGCCCCGGCTAATTGCAACCCATTGCGTGCCAGATGCTGGTTTCTTGCGCAATGCGGCTTCACTCGGGCGTTTTTC
CAGATTATGCTGAAAAATTACCTCAGGAAGAAAAGATGGAAAAAGAAGATTCATTTCCCCAACGCGTCTGGCAAATCGTAGCAGCTATTCCCGAAGGCTA
TGTCACCACTTACGGTGATGTGGCGAAACTGGCGGGATCGCCCCGCGCCGCGCGCCAGGTGGGTGGTGTGTTAAAGCGTCTCCCGGAAGGCAGCACCTTG
CCCTGGCATCGGGTGGTTAATCGCCACGGCACCATTTCGCTAACCGGACCGGATTTACAGCGTCAGCGACAGGCATTACTGGCAGAAGGTGTGATGGTGT
CAGGAAGAGGGCAAATCGACTTGCAGCGTTATCGCTGGAACTACTAACCCTCTCCGGGCGGCTGTCTCTTGATCAGATCTCCTGATCAAGAGACTTCATC
ACCAGGTAACCCTCAACCATATCCTGAAGTCTGAACCAGCCATCCCACATGACTACCCAACCGGGGCGACCGGTGCGTTTGCTGTCATGCCATCGCCCCA
GTTTCGCCAGTTTCAGACAGGCCCATTTCAGTGTCGGCATCTGTGACGGAAGCGGTTTTCCTTCCAGCTTAACCCACAGCAGTTTCCACTCTGTCGGCGT
CAGTATTTTCTCACAGCTGTCATTTTGTGTTTCTTCACTGATACCGCCCTGCCGCAGGCCCAGCACCCGCACCGCGATAAACGCCTTGATAACCACCATG
CGCTCGAGGTTATCCCGGGTCTGCATTCGCAGCGATTCCACACATGTACCACCACTTTTCCACGCCTTGTGGTATTCCTCTATCAGCCAGCGTCGCTCGT
AATGGCTGACGATACGTCGCGCATCGGCGGCACTCGCCACTTTTTCTGACGTCAGCAGATGCCAGCAGGCGCCGTCCTCTGCCTGCTCCCGGCAACAGAC
ATACGTGAGCGGGAGCGCCTGGCCGCTGTTGTCGGGATTTTTATGCTGACTTCGCTGTAACTGATGAACATCCGGGCCTGGCGGGCTGCCCGCCCGCCTT
TTTGCATCACATTCAGCGTGTGGCTTCCCGCGGTTGCCAGGACTTCCGGCAGTTCGAAGAGCTTGCCGGGTGCTTCTTCCAGCCGGCGATTCTGTGCTGC
ACGCACCACGAAGCGCTGCCCGTGGCTGACTTTATAATGCAGGTAATGCCAGATATCCGCTTCCCGGTCACAGACAGTGATTACCCGTTTCTGTATCTCC
CCCAGCCATTCGGCCATGCGCTCCGAAGCCTGCTGCCAGCGGTAACTTTCTTTTTCTTCATAGGGACGTTCTTTTCGCTGGTGCTTAACACCGTAGGTGT
CCGTGGCACGACTCCAGCGCTGCTGTTCGATAAGACCGACTGGCAGGGCGCTGTCGGGGGCGTACATCAGGACAGAGTGAGCCAGCAGCCCGCGCGTCTT
CGGGTTAGTGGTGGTATTCCCCAGGTCATCAGATGCCGTACTGTGACTGAAGTTAATGGTGGTGGTGTCTTCCAGCGCGAGGAGCAGCGGATGAGCCTCA
CATGCCCTTACAGTGGCGGTAAATCCGGCTTCGGCAATGGCTTGCGGGGACACAGACGGGTTACGTATCAGGCGGTACGCACCTTCAACCTGAGCAGTGG
ACTGGGATGATTTCACAATAGAAAGACCTGCATGCTGAGCGAGAGAAGAGGCCAGTGACACAAGGCGTCGTGTACGACGCGGATCACCGAGACGGGCATG
TCCAAACTGCTCGTTAGCCCATGAATAACAATCAGAAAGTACCATAACAGACCCGAAGGAAATGAAATATAAGAGAAGATCAACAGGTGAGGAAAAAGTT
CAAAAAATCGCTGCCGGGGAGGAAGGAAACTACCGGATGGAAAGAGTCCCCCTAAAGCAGACTGACAGACATCACAAATCCCCGGGTGGGGATTTGTGTA
TAAGAGACAGCCGGGCGGAGAGGGTTAACTTCGCTTAATATTGCGTAGGAGCTGGAACTGCCGAAGACGGATTCACCTGGGTTGGTGAAGTTGAAGGTAC
GGTAGTCGTTGCGCCACCGCTAGCCTGAACCGGCACGGCGGTTTGCTGCACCGGCACCAATGTCAGGTCGGCTTTAGTTCCGCCCTGGTTGATCACCGGC
TGAACGGTATCGGTAATAAATACCAGTTTGTCATTCACGGTAATCGCCGCACTCAACAAAATACGCGCGTTCGGCTGAACATCTGCCGGGTTAAATGGCA
GAACAAAGCTGAATGGTGACTGTTTACCTTCGGTACGCACCGCTTTCTGCGCCAGCACTTTCGACGGCGCATCGGCTAACGACGCGTCAGAAAGTGTCAC
GGTCAGCACGGCATCAGGCGGCAGTGCGACTTTCTGACGGATCCAAACGGTACCGGAGACATTCGGTTGCTGGATAGCAGGTTGTTGTGTTGCTGAAATA
GACGTATTTGCAGCCGATGCTGGCGTCTGAATATCCGCGCTTTTATCTGCGCAAGCCGCCAACGCAATCGCAACCGCTAAACCACTGGCCATGTGCACGA
GTTTCATTCACTTCTCCTTATTATCAATGCACCAGCGGGCTAACTTTCCTCGCCGGAAGAGTGGTTAACAAAATAGTAACGTCAACAAGTGTGGCACACA
TCACGCATTTCTGCCTGTAATTAGCCCGTAATTCAGACCATTGCACCCATCGGACCAGTGGCAAATTTGCGTTATACTCAACTCACTTTGGCTTGCTGCG
GCAGCTTTGTTACTGGAGAGTTATATGAGTCAGGCGCTAAAAAATTTACTGACATTGTTAAATCTGGAAAAAATTGAGGAAGGACTCTTTCGCGGCCAGA
GTGAAGATTTAGGTTTACGCCAGGTATTTGGCGGCCAGGTCGTGGGTCAGGCCTTGTATGCTGCAAAAGAGACCGTCCCTGACGAGCGGCTGGTACATTC
TTTTCACAGCTACTTTCTTCGCCCTGGCGATAGTAAGAAGCCGATTATTTATGATGTCGAAACGCTGCGTGACGGTAACAGCTTCAGCGCCCGCCGGGTT
TCTGCTATTCAAAACGGCAAACCGATTTTTTATATGACTGCCTCTTTCCAGGCACCAGAAGCGGGTTTCGAACATCAAAAAACAATGCCGTCCGCGCCAG
CGCCTGACGGCCTGCCTTCAGAAACGCAAATCGCCCAATCGCTGGCGCACCTGCTGCCGCCAGTGCTGAAAGATAAATTCATCTGCGATCGTCCGCTGGA
AGTCCGTCCGGTGGAGTTTCATAACCCACTGAAAGGTCACGTCGCAGAACCGCATCGTCAGGTGTGGATCCGCGCAAATGGTAGCGTGCCGGATGATCTG
CGCGTTCATCAGTATCTGCTCGGTTATGCTTCTGATCTTAATTTCCTGCCGGTAGCTCTACAGCCGCACGGCATCGGTTTTCTCGAACCGGGGATTCAGA
TTGCCACCATTGACCATTCCATGTGGTTCCATCGCCCGTTTAATTTGAATGAATGGCTGCTGTATAGCGTGGAAAGCACCTCGGCGTCCAGCGCACGCGG
CTTTGTGCGCGGTGAGTTTTATACTCAGGACGGCGTGCTGGTTGCCTCGACCGTTCAGGAAGGGGTAATGCGTAATCACAATTAAAAAAATAGCCGGAGG
TGAAAACCGTCCGGCTGTTTTTTGCAGTGCTTATTACGCGTTATAGGCATTTTCGCCGTGGCTGTTGACGTCCAACCCTTCTCGCTCCTGTTCTTCCGGT
ACACGCAGACCAACCGTCAGATCCGCCAGTTTGTAGCCAATAAACGCCACCACACCGGACCAGACGATCGTAATGGCGATGCTTTCCAGCTGTACCAGCA
ACTGATGGCCCATCGTCACACCTTCAGCGAAGCCCACGCCGCCCAGCGAACTGGCGGCAAAAATCCCGGTCATGATACAGCCGACAATGCCACAAACACC
GTGCACACCGAAGACATCGCAGGGATCATCCACCCGCAGCAAGCGTTTGAGCATGGTAACGCCCCACAAGCCCGCCAGACCAGCTACCACGCCGATAATC
AACGCGCCGCCAACACCAATGTAGCCACACGCTGGCGTCACGCCGACCAGACCGGCAATCGCGCCAGAACACGCTCCCAGCAGTGAAGGCTTACCGCGCA
GCGTCCATTCACCGAAGATCCAGCCAAGAATTGCTGCCGCCGTTGCGACCACAGTATTCACAAATGCCAGTGCTGCGATTTCATTCGCCGTGCCCGCTGA
CCCGGCGTTAAAGCCAAACCAACCGATATAGAGAATGGCAGTCCCGGTGAAGACCATCGGCAGGTTGTGCGGTTTAAACGCCTCTTTGCCGAAGCCCACG
CGTTTGCCTATCAGATACGCGCCCACCAGACCGGCGATTGCGGCGTTAATGTGCACCACCGTGCCACCCGCGAAATCCAGTGCACCGTGAGAAGCCAGCA
AACCGCCGCCCCAGACCATATGCGCAATCGGAATGTAGGAGAGCGTCAGCCATACCACCACGAAAATCAACACAGCTGAGAAGCGGATTCGTTCCGCCAG
TGCTCCAACTATCAAGCCTACGGTAATGCAGGCAAACGATCCCTGAAACGCTACGTGGATATACTGATAAATGCTGCCCATCACCGCCGTCAGTTCGATG
TTTTTCAGCATCAACCAGTTAATGTTGCCGAAGAAGTTGTTTCCCTCACCAAACGCCAGCGAGTAACCGTAAACCACCCAGAGAATACAGACCAGTGCAA
ACGTCACCGTCACCTGCGTCAGCATCGACAGCACGTTTTTGCCGCGAATCAACCCACCGTAAAACAGGGCAATCCCCGGAATAGTCATAAACAGCACCAG
CGCAGTACAAATCATCATAAACGCATTGTCGGCTTTATCGGCCACCGCAGGTGCAGCCATTACCAGTCCCGGCAGCATCGCCAGTGAAGTAAGCCCAGTT
TTTATCGTTGCTATCTTCATTTTTCGTTCCTGTTGCTGTGTGCCAGAGATTACAGCGCCGCTTCATCGGCTTCGCCGGTACGAATACGAATGACGCGTTG
CAATTCAGCGACGAAGATTTTGCCGTCGCCAATTTTTCCGGTGTAAGCCGCTTTGCTGACGATATCGATCACTTCATCGAGTTGGTCATCAGCAATCGCC
ACATCAATTTTTACTTTTGGCAGGAAGTTGACGCTGTATTCCGCCCCCGGTACAGCTCGGCATGCCCTTTCTGACGCCCGAAACCTTTCACTTCGGTGAC
GGTCAGGCCCTGAATACCAATGGAAGATAACGCTTCACGAACGTCTTCCAGCTTGAATGGTTTGATTATCACGGTCACCAGCTTCATAGATCCCCTCCGG
TCAGAATTCGGTAATGGTTCTGCTACACGAAGAAGGTATTGCAAGCGGTGTGCCAGAAATGAAAAACGAGAAAGAGAGCAGGAAGTTAAGAAGATTGAAA
ATGAAAACGCACTATGACAGTGCACAGTGCGTTACATTTTTGCACCAACGATGAAATATTGCGCTATTCAGGCGCTCAATGATTCCTCTTCACGCACGCT
GGCTGCCAGCTCTTCGCCCGCAAGTTGCAGTTGATACATCTGCCAGTAGCGTCCCTGGGCCGCCAGCAGTTGCTGGTGAGTGCCCTGCTCCACGGCTTGC
CCACGATGAAGCACCAGAATGGTGTCGGCATCAACAATAGTCGATAAGCGGTGAGCAATCACCACAAGCGTAGTATGTTCACGCACCGCCGCCAGAGCAT
GTTGAATCGCCTGTTCAGTCCCGGAGTCAATGCTGGCGGTTGCCTCATCAAGGATCAGGATTTGCGGCGTCTCCACCAGCACGCGCGCCAGTGCCAGCAG
TTGCTTTTGCCCGACTGAGAGATTATTTCCCTGCTCGCCAAGCGGCGTGTAAATACCATCACTCATGCTACGCGCCAGCTCCGCCAGCTGCACGGTTTCC
AGCGCCTGCCAGACGCGTTCTTCAGAGATATCACGTCCCAGCGTCACGTTGGCGAGGAAGGTATCCGCCAGCACCACCGGATCTTGCTGCACCATTGTCA
CGCCCTGGCGCAGCGCACTGTGACTTAGCGTACTTAATGGACGACCATCAAGGCGAATCTCACCTTCCGTTAGCGGGTAATAGCCCATCAATAAACTGGC
GAGGGTGCTTTTGCCACTGCCGGTATGCCCGACCAGCGCCACAAAGTTGCGCGAAGGCACAGAGAGATTAATGTTCTTTAGCACCAGATTGTCATCGCGA
TAAGCAAATGACACGTTATCGACGTCGATGGTGCCGCTCTGCAACGGGCGATCATCATTGCCATATTGCTGGCGCGGTCCGTCCATCAGCTCAAAAACGC
GCTCACCAGCAACAACAGCCTGTTGCAGCATCGCCTGCTGCGTGGTCAGTTCGATTAAGGGTTCGTTAAGTCGCCCCAAATAACTGATGAACGCATACAA
CACGCCCACTTCAATGGTGCCGCTGGCGGAGAAGCCAAACAGCATCAACAAGCCACAAAGAATGAGCGATGAAAACAGACTCAGCAGCGGACGCAGCAGA
AAACCGTCGAGGCGCAGGGTTTGCATCCTCGCCATATAGTGTGAACGACTAGCCTCACCCATACGTTCGCCAAATCGCGCCTGCTGACGGAACTGCTGGA
TAACGCTCATGCCATTGATGATTTCGTTAAAGCCGTCGTTGATATCCGCCAGATAAGCGCGCACACGACGGACAATCGGCGTGCTGTAACGCTGATATAT
CACCATTACCACCAGCACCACCGGGAAAATCATTATCGCCACCAGCGCCATTCGCCAGTCGAGGCTGAACATCGCCACCAGCATCGCGCCCACCAGTGCG
GCGCTACGCAGGACAGTTGCCACTACGGTAACGTAGAGATCGCGGATCACTTCAGTGTCATTAGTGACGCGGGAAATCACCTGCCCGACGGGTTGGGTAT
CAAACTCGCTTAATGGCTGGCGTAACGCAGCATCCATCACGTCGGTACGCAACTGTTGCACTACGCCTACTGCCGCCCGATTAAACAGCAGCGACTGCGC
GTAATGTAGCCCGGCGGCAAACAGTTGCAGCCCAACATACGCCGCAGCCAGCCCTGCAACCACTTTCAACGGCAGGTTATTTTTCGCTACCATATTGTCG
ATAAAATAGCTGATAAGCAGCGGCCCACTGACTTCTGCCGCCGCCGCAACCCACATCATCAGGACCGCAATCCCCAACGGTTTACGCCACGGCGAACCGT
ACGCTAACAGGCGCTTGAGAGTCGGCCACAGTTGGCTAAAACTACGCATCGATGGCCTCCTCGCGAATTTCCGGAGCGTCGTCGAGCGCCGCCTCCAGTT
GTTGATAGCGATACATATCGCGATACCAGCCACTTTGTTGCGCCAGCTCATCATGATTGCCACACTGGGCGATATGTCCGTGCTGCATCACAATAATTTC
ACTGGCTTCCGTCAGTGCAGAAAGGCGATGGGCACTGATGATTACCGTTCTTCCCTGCCCCCACTGACGCAGGTTATGCAGGATCTGGTGCTCTGTGCGT
CCGTCTACTGCCGAAAGCGCATCATCAAGGATGAGGATTTCCGCGTTGACTAATAACGCACGAGCAATGGAGATACGCTGTTTTTGCCCACCGGAAAGCA
TCACGCCGCGCTCGCCCACTTCTGTATCGTAACCTTGCGGTAAACGCAAAATATCGTCATGCACGCTGGCTAACCGCGCGACATGCTCAATCTCTTGCTG
GGTGGCATTCGGGCAACCCAACGCGATGTTGTTCGCTACGGTGTCGGAAAAAGGAACGGTGTCTGGCTAACTACCGCCAGGCGGCTACGCCAGCTATCGA
GTTGTAACTTCGTCAGAGGAATATCATGAAAGCGGATATCCCCCTCGCTGACGTCGAAATGACGCTGAATGAGCGACAACAGGGTACTTTTGCCGGAACC
AGTCGGCCCGCAAATACCTACCATCTGACCGGGTTTCAGGGCGAAATTGACGTTTTCCAGCGCAGGATGGTCAGTCTGCGGATACGTAAACTGGCGAATA
TTCACATCCAGTTCACCACGACCTTCTGGCACCTTATCACTACCATCAATAACGACTGGCGCTTCGGCCAGCATGGTACGAATTCGGCTATACGCCGCGC
TGCCACGTTCCACAATGTTAAACATCCATGCCAGCGCCAGCATTGGCCAAATCATCAGACCTAAATACATCATAAAACTGGTGAGCTGGCCCAGCGTTAA
ACTGCCCTGTACCACCATCCAACTACCGCCGCCAATCGCCAGCAAGTTCGCCATACCAATCGCGATATAGATGGTCGGGTCGAAACGAGCATCAATACGC
GCCACCCGCATGTTTTTTGCCGGTATCTTCGGCATCCGCGGCAAATAACGCCGACTGACGATCTTCCAGACCAAAGGCTTTGATCATGCGAATACTGGTG
AGGCTTTCCTGGGTGCGGTCATTAAGACTGGAAAACGCCGCCTGTGCCAGCTTAAAGCGTTCATGCAAGGCATCGCCGTTGCGCTTGATCATGATCGCCA
TCACTGGCATCGGCAACAGGGCAAATAAGGTCAACTGCCAGCTAATTTGCGTAGACATCATAATCAACACAGCGCAGCCCATTACCAGTGAATCCACCAG
CGTCAGCACCCCTTCTCCGGCGGCAAACACGACGCGATCGACGTCATTGGTCGCACGAGCCATGAGGTCACCCGTGCGATGACGCAGGTAAAACTCAGGA
TGCTGCCGGCTTAGCTGGCGGTAATAATCTTCACGCAGTTCAACAGCCAGTTGATAAGACGCACCAAACAGCAATACGCGCCAGACGTAACGCAGGAGAT
AAACCACAACGGCAATCAGCACCATGGTGGCGATCCACATCAGGATCTGCCCGGTAGTAAAGTGTTGTTCTGTCACGCCATCGACAACAATACCAACCAC
TTTTGGCGGAACCAGTTGCAGCATCGCGATAATGACAAGCAAGGCGACAGCCCCGAGATAGCGACGCCATTCCCGACGGAAATACCAGCTTAATTGAGCA
AATAATCGCACGCGTTGTGTCCTGACTTGATTCTGGATATTTATTCGATGGGTAAAGAAGTGGTGTATTTAATCTGTTCCATCGCGAAGCTGGAAGTGAC
GTCCGACAGCCCCGGTACACTGTTTACCAGACGCTTATAAAACTCGTCGTAGCGTTTCATGTCGGCAACCTGGACGCGCATCAGATAATCGTATTCACCG
GCCATGCGCCAGAACCCCAGCACTTCTGGCATTTCGGTAACCACCGTGACAAAGCGGCAATACCATTCGCTGCTGTGATGTTGCGTTTTTATCAGCACAA
AGGCGGTCAGGCCGAGGCCTATTTTTTCCGGATCCAGCAGGGCGACTTTGCCGATAAGGATACCGTCGTCCTCCAGCCGTTTCAGACGCTTCCAGCAGGG
GGTGGTTGTCAGATTAACGGCTTCAGCCAGTGCCTGCAAAGAGAGGGTGCAATCCTGCTGTAGCAAGGCCAGCAGCTTACGGTCAATTTTATCTAACATA
GCCCTTCCACAGAGAATTTTTTCTCTTTTAATTCTATTTTAAAGGTGAAATCGCGACAATTTATTCTGTGCGGTTTAAGCATCACGGCACAAAATGACAA
ATTCAACGCAAAAAAACCGGGCAATTGCCCGGTGCTGGAAGGGATCTCGTTATTCGGGGGAATAAGGTAGATGTGGATAGTCCAGCCAGTGCGTCAAATA
GTGAGAGACAGCCTGATTTCGGCAATGTCCAATCACCGGTAAATGCGGGAGCTCCGCGCGCAGTTGCGGCATCGCATTGCCCATAATAAATCCGCTACCG
ACGCTGCCTAACATTTCGCGATCGTTCATCGCATCACCAAAGGCCATGCAATCGCGTAACGATAAACCTAAATGTTGGGTCAGCACCGTCAATGCAGCGC
CTTTATTGCAGCCCACCGGCAGCACTTCGAGGCAATCCGTGGCGGAAAAACATAAATGTGCACGCTCGCCTAATGCTTCGTATAGCTGGATCTGCAAGCG
TGTAAGATCGTCGTGATCGCCACAGAAGCAGATCTTGGTGACGCTGCCGAGTGGCATTTTTTTGACATCGATTATCTGATAACGAAAACCGCTATAGACA
AATGCCTGCAACAACGCAGGGATCTCTTTCCCGGTAAACCAACCATCGTCATTGAAGATATGCATGCTTGCTCGGGTATCCCATTGCTGATACAGCACCA
GCTCCGCGACATCCGCAGGTAAATCATCACGATGTAAAAGTTCACCTTCCAGAGAATGCACGCGCGTTCCGTTGCCAGTAATCAAATATGCATCCAGCGA
TAGCGCCCCGAGAATATGCTGCATCTCCAGCGCATGACGCCCCGTGGCAAAAGTGAGGGTAATGTCGCGTTCACGCAGCCGCGCCAAAGTAGAGAGGGTT
TTCTCACCTAAATGATGGTCAGGCATCAATAAAGTGCCATCCATATCAAATGCTGCCAGACGAGCCATTTCTTTCTCCACTCTGTGACACAGTTAATGGT
GATTGAGTATCACCTGATATATACGGAAGTAATAGTGAATAGTTAAATAATATTGTTCCGGGTTTATATGCGACTGCTCAACCGTCTTAACCAGTATCAA
CGTCTGTGGCAACCTTCCGCCGGGAAGCCGCAAACCGTCACCGTCAGCGAACTGGCCGAACGCTGTTTTTGCAGCGAACGCCATGTTCGTACGGTGTTGC
GTCAGGCACAGGAGGCGGGATGGCTGGAGTGGCAGGCACAGTCAGGACGCGGAAAGCGCGGACAACTGCGCTTTCTGGTCACGCCGGAATCGCTACGCAA
TGCGATGATGGAACAGGCACTGGAAACCGGAAAGCAGCAAGATGTGCTGGAGCTGGCGCAACTGGCCCCAGGTGAGCTGCGCACTCTGTTACAGCCGTTT
ATGGGCGGACAATGGCAAAACGATACGCCCACGTTGCGTATTCCCTACTATCGCCCGCTCGAACCGCTACAACCGGGCTTTTTGCCCGGCCGTGCCGAGC
AGCATCTCGCCGGACAGATATTTTCCGGCCTGACCCGCTTCGATAATAATACCCAGCGCCCGATTGGCGATTTAGCGCATCACTGGGAAACCTCTACTGA
CGGGTTACGCTGGGACTTTTATCTTCGTTCAACCCTACACTGGCATAACGGCGATGCAGTAAAAGCCTCCCACTTACACCAGCGGTTATTGATGCTGTTA
CAACTGCCAGCACTGGATCAATTATTCATTAGCGTGAAGCGTATTGAAGTCACCCATCCGCAGTGTCTGACCTTCTTTTACATCGCCCTGATTACTGGCT
TGCTCACCGGCTGGCGAGCTATTGCAGCCATCTGGCGCATCCGCAATTCCCACTGATCGGCACGGGTCCTTTTCGCTTAACACAATTCACAGCGGAGCTG
GTGCGCCTGGAAAGCCATGATTATTACCATTTACGTCATCCGCTGCTTAAAGCGGTTGAGTACTGGATAACTCCGCCGCTTTTCGAAAAAGATTTGGGAA
CCAGTTGTCGGCATCCCGTGCAAATCACCATCGGCAAACCGGAGGAGCTGCAACGGGTCAGCCAGGTCAGTAGTGGCATCAGTTTAGGTTTTTGCTATTT
AACGTTGCGCAAAAGTCCCCGACTGTCCCTCTGGCAGGCGCGAAAAGTGATCTCCATTATTCATCAATCCGGTTTATTACAAACGTTAGAAGTCGGAGAA
AACCTGATCACCGCCAGTCATGCATTACTGCCAGGCTGGACTATTCCGCAATGGCAAGTACCGGATGAGGTCAAACTACCGAAAACCTTGACGCTGGTTT
ATCACCTACCGATAGAACTTCATACCATGGCAGAACGCCTACAGGCGACACTGGCAGCGGAAGGCTGTGAACTCACAATTATTTTTCATAACGCAAAAAA
CTGGGACGACACGACCCTACTGGCACACGCAGACCTCATGATGGGCGACAGATTAATTGGCGAAGCACCGGAATATACCCTGGAGCAATGGCTGCGTTGC
GATCCACTGTGGCCACATGTTTTCGACGCTCCAGCATATGCACATTTGCAATCGACACTGGACGCGGTGCAAGTTATGCCTGATGAGGAAAACCGATTTA
ATGCCCTGAAAGCGGTTTTTAGCCAGTTAATGGCAGATGCGACGCTGACACCGCTGTTCAACTATCACTATCGCATTAGCGCCCCTCCCGGCGTGAACGG
TGTGCGACTGACACCGCGCGGCTGGTTTGAATTTACCGAAGCCTGGCTTCCCGCGCCGTCGCAATGAATAGCTGGTCCGGGTTAATCGCAGGCGTTACCA
TAACGCTTTTATTGTTCAAGCAGGATTATCTATGAAACGTGCTGTCGTTGTGTTCAGTGGAGGCCAGGATTCCACCACCTGTCTGGTGCAGGCATTACAA
CAATATGATGAAGTCCATTGCGTGACGTTCGATTACGGTCAACGCCATCGCGCAGAAATCGACGTGGCACGCGAACTAGCGCTGAAACTGGGGGCACGCG
CGCATAAGGTGCTTGATGTAACGCTGCTCAACGAGCTGGCGGTCAGCAGCCTGACGCGTGACAGCATTCCGGTGCCTGATTATGAACCTGAAGCCGATGG
TATCCCGAATACGTTTGTCCCAGGGCGTAATATTTTGTTCCTGACGCTGGCGGCAATATATGCGTATCAGGTAAAAGCAGAAGCCGTAATTACCGGCGTC
TGCGAAACGGATTTCTCCGGCTACCCGGATTGCCGCGATGAGTTTGTGAAAGCACTAAACCATGCCGTCAGTTTGGGCATGGCGAAAGATATTCGTTTTG
AAACGCCGCTGATGTGGATTGATAAAGCGGAAACCTGGGCGCTGGCAGATTATTACGGCAAGCTGGATTTAGTCCGTAACGAAACGCTGACCTGTTATAA
CGGCATTAAAGGCGACGGTTGCGGTCATTGTGCGGCGTGTAATTTACGTGCCAACGGTTTGAATCATTATCTGGCCGATAAACCGACGGTGATGGCAGCG
ATAAAGCAGAAAACCGGGTTGAAGTAATTATTCCGGGTGTCGCCGGATGCGGCTTGAGCATCCGGCACCACAAAACGTTTACTTAACCATCTGCTCCAGC
TTTTCGCGCAATTCCCCTTCCAGAGCTAATGCTTTCTGCGTTTTAAGATCAATACAAACAAACGTAATAAGCGCATCCGCTACCACCTGTCCTTCCGGCT
CCAGTGTAATGATCTGGCTTAAGATGCCACTTTTACCGTTTAATTGCTGCAACTGACTGGTAATGGTTAACAGGTCGCTTAATACCGCCGGGCGGCGATA
GTTAATATTGATATTGACCACGACGAAGGCGATGTTATGGGCCGTCATCCAGTGAAAACTGTCGCTATTTTCCAACCCATGCCAGCGGGCTTCTTCGAGA
AATTCAAGGTAGCGGGCGTTGTTTACGTGCTGGTAAACGTCGAGATGATATCCACGAACTTTGATTTGTGTTTGCATAGCGCAATAACCTTACGTTGTTG
TTATAAGAACTGTTATAAGTACAGAGGTCATAACTGGTATGACCTCTTCAGTCTGGCAAAAAATTGCCACTATGCAAATTAATTACAGGGTTAATACCGC
CAGATTACGTTCCACCAGCGAATTGCCCATCCCCGGCACCTGCTTTAGATCCTCCACCGTTTTAAACGGACCGTACTCTTCGCGATAACTGACAATCGCC
TGCGCTTTCTTCAGGCCAACGCCATTCATCGCGCGGGCTAACTCTTCCGCGCTGGCATTATTAATGCTGACCCGGGTGCCTTCTTCGTCACTGGCTTTCG
CCGGAACTGCTGCTTTACTTTGTGCTGCAGGAGCTTCCGCTTTGGTTTCTACCGTTGTCGGTTTTGCCGCAGGAGCTGCCGCCAGCGCGCTATGAGACAT
TCCGGCACAGGCCAGGGACAGGGTAATGAGCAGTGCTTTAATTCCGTGTTTCATACTGTTTTCTCCTTGTTTGTTAACAGTGGAATCACCTTAACGGCAG
TGAAAACAGTAAACAAATGGCAATGTTCAGAAATGGAAAAGGCCGCGAAAGCGACCTTTTCTTGTTACAGCTGCAAAGCATTTTTTTGCGAGGCGGCTTC
AGGATTATTGCTGTTCCAGCGCATCGCCAATTTTGATTTTCGCCTCTTTACGCAGGTTACTCATCAGAGCTTCAAAGACGATTTGTGCGTTGTTCTGGGT
GATACCTTGCACCATCGCTTTTTCTGATCTTCCGGCATTGAACCTTGCTTCACTTCATCCAGCGCCAGCAGAACTACATTACCTTGCATATCGGTCGCCA
TACCGTAGCTCGGTTTGTCTTTCGCTGGCAGCGGCAGTGCAAACGCAGCCTGGCTAATCGGGTCACGACCGGAACGGCTTAAGGTTTTCGGCTCGCCAAA
TTTCAGACCGGCAGCCTGCATAGCTTCCGCACCTTTGCCGGCTTTCAAATCAACCAGCAGTTTCTCAGCATCCACTTTCGCCTGTTGTTCAGCTTTGTTG
TGCTGAACCAGTGCCTTAACTTGTTCCTGAACATCTGCCAACGGTTTCACCGCTTCCGGTTTGTGCTCGCTGATGCGCAGCACGAATGCGCGGTCGCCGT
CTACGGTGATGATGTCAGAGTTGATGCCCGGCGCGCCGTTTTCACCTACCAGACCGCCGTTGAAGATAGCGTCGGCAACTGGCTTGAAGTTCAACTCTTC
CGGCAGGTTATCTTTGCTGAACCAACCCGTCTGAGTGGCTTTAACGCCGGCAGCTTGCTCTGCACCGGCCAGAGACTCGGTGTCGTTGCTTGCCGCATCG
CTCACTTTCTGCTGCAGCGCGTAGTACGCATCGAGGGCTTTTTCGTGTTTCACTTTCGCCGCAATGTCGTCACGTACTTCGTCTAACGATTTCACTTTCG
CTGGCTGAATGTCGTCCAGACGCACAATCAGGAAACCGACCGAAGATTTGATAACACCAGACAGTTGGCCTTTTTCTTTCAGACCCGCATTTTTCAGTTC
GTCCGGGATAGTGGCATCTTCTAACCAACCCATATCACCGCCGTTGCGGGCAGAGATAATATCGGCAGATTTTTCTTTGGCTAATGCAGCAAAATCACCG
CCCTTATTCAGCTCATCAAGTACCGCTTTCGCTTCATCTTCAGTTTTGGTCTGGATGATGCTGTAACGGGTACGCTGCGGCTGGGTGAATTGATCCTGAT
GCTGATCGTAGTAGCTCTGGATATCCGCATCGCTAACCGGTTGCTGCATCGTCGCGGCATCCAGCTTGATGTAACTCACGCGGAATTGTTCCGGCGTCAT
GAAATTGTTTTTGTTTTGTTCGTAGTAGCTGGCAATTTCCTGTTCGGTCACAGGCTGCTTCGCCGCCAGCGCGTTAACATCGATAGTCGCTTCACGCACC
ACGCGTTGTTGAGCTACCAGTGCCGCCAGCTCGTCGGTTTCACCTTTCAGCATAAAATCGGTACCGGCAACGCCGTTAATCAGCTGTTGGGTAGTGAGCT
GGTTACGCAGCGCCTGGGCGTACTGATCGGCGGTCATCCCCATCTGGTTGAGGATACCGTTATAGCGGCTGTTATCAAATTTGCCGTCAACCTGGAAGGC
TGGGGTCGCGAAAATCGCCTGTTTAACCTGCTCATCGCTGATACCCAGTTTCAGCTCACGAGCGTACTGATCCAGAAGCGCCTCGTCGATCAGACGATTC
AGCACCTGTTGACGCAGGTTTTTCATATAGCCTTCGTTCGCTGCCAGCTCGGAGTATTGATCGCCCAGCTGTTGCTGCATGCGATTACGCTCGCTGTTGA
AGGCGTTCTCGAATTGCCCACGGCTGATTTCCTGGTCATTCACTTTTGCGGCGTAGTTATTGCCTCCGCCAATCAGGTAACCACTCACGCCGGTCAATAT
GAACGACACGATAATGATACCGAAAATAATCTTGAGCACGAGACTGTTTGCAGCCGTGCGTAAGCTGTCCATCATGGTGTAACAACACTCCGCTGTAGAT
GACTGTGTACCTCACGCAACGTATCGATGCGCGCAAAGGCCTATTGTGACAAGAAACGGGGGCAATTGTCAGCCCACAAGACGCAGAAAGTCACCGAATA
CAAATAAAAAAGGCACATCAGTAGATGCGCCCTTGAACTTCGTCACATCCCCACTGGGGACAACGCTTAGTTTACCGCGTCTTTCAGTGCTTTACCTGCA
CGGAAGCTCGGTACTTTAGCAGCAGCGATGGTGATCTCTTTACCGGTCTGCGGGTTGCGGCCAGTACGGGCAGCACGCTCTTTGACGGCAAAAGTACCAA
AACCTACCAGTGCTACATCATCCCCTTCTTTCAGAGATTCAGTTACGGAAGCAATAATAGCATCTAACGCACGGCCAGCCGCAGCTTTAGAGATATCAGC
CCCTGCAGCAATCTTGTCGATCAATTGAGATTTATTCACTCTTCTCTTCCTCTTTATAATTTATATCGCACTTGAATCCTTCAAGGTACGAACGCGCAGC
AGTTATATCAGGCCAGCCATCCCCTTACAACACCCCTTAATAAGGGCAAGCCCGATCCGCCATCTAACTTAGCGAGACAAAAAAGGCTGGCAAGCCCGAA
TTAGCCTGCCAGCCCTGTTTTTATTAGTGCATTTTGCGGGAGGTCACTATTTTGCAGTCACAACCTGCATGCCAGACGGTTCATTTTGTAGCGCCAGAGT
CAGAACTTCCTCAATGCGCTTCACAGGATGAATGTCCAGATCGGCAATTACGTTGTCAGGAATCTCTTCCAGATCGCGTTTATTTTCGAACGGAATTAAC
ACTGTTTTAATCCCGCCGCGATGCGCTGCCAGTAGTTTTTCTTTCAAACCACCGATCGGCAGTACCTGACCACGCAGAGTGATCTCACCGGTCATTGCCA
CATCGGCACGAACCGGGTTACCGGTCAGGCAAGAAACCAGCGCGGTGCACATGGCAATACCGGCACTCGGACCATCTTTCGGCGTCGCACCTTCCGGTAC
GTGGACGTGGATATCACGTTTTTCGTAAAAATCAGGGTTGATCCCCAGTTTTTCCGCACGCGCACGAACCACCGTTAACGCCGCCTGAATAGACTCCTGC
ATCACTTCGCCGAGCGAACCGGTATAGGTCAGTTTACCTTTCCCCGGAACGCACGCGGTTTCAATGGTCAGCAAGTCACCACCCACTTCCGTCCACGCCA
GACCGGTTACCTGGCCGACACGGTTTTCGTTATCCGCGCGCCCATAGTCGAAACGCTGAACACCGAGGTAGTCATGCAGGTTATCGCCGTTAATTTCGAT
ATGTTTTAATGACTTATCGAGCAGTAACTGCTTAACCGCTTTGCGACACAGTTTGGAGATTTCACGCTCCAGACCACGCACGCCCGCTTCACGGGTGTAG
TAACGAATAATGCCGATAATGGCGCTATCGTCGACGGTCAGCTCACCTTTTTTCAGTGCATTACGTTCAATCTGCTTCGGCAGCAGGTGACGTTTGGCGA
TGTTCAGTTTTTCATCTTCGGTATAACCGGAGAGGCGAATCACTTCCATACGATCCAGCAGCGGTGCCGGAATGTTCATGGAGTTCGACGTCGCGACAAA
CATTACGTCGCTGAGATCGTAATCCACTTCCAGGTAGTGGTCGCTGAACGCTACGTTCTGCTCTGGATCCAGCACTTCAAGCAGTGCGGAGGCCGGATCG
CCACGCATGTCAGAAGACATTTTGTCGATCTCATCGAGCAGGAACAGCGGGTTTTTCACGCCCACTTTCGCCATTTTCTGGATCAGTTTACCCGGCATAG
AACCGATGTAAGTACGGCGGTGACCACGGATTTCCGCTTCATCACGCACGCCGCCCAGCGCCATACGGACATATTTACGCCCGGTGGCTTTGGCGATGGA
CTGACCCAGGGAGGTTTTACCTACCCCGGCGGCCCTACCAGGCAGAGGATCGGTCCCTTGATTTTGTTGACACGGCTTTGAACCGCAAGATACTCAAGGA
TACGATCTTTCACGCGCTCCAGACCATAATGGTCGGTATCAAGGATTTCCTGCGCCTGACGCAGGTCTTTTTTGACCTTGCTACGCGCATTCCACGGCAC
CTGTACCATCCAGTCGATATATCCACGCACTACGGTCGCTTCTGCCGACATCGGAGACATCATTTTCAGCTTCTGCAGCTCTGCTTCCGCTTTCTCTTTT
GCCTCTTTCGGCATCTTCGCCGCGTCGATTTTGCGCTTCAGGGCTTCGTTTTCGTCCGGCGCGTCGTCCATTTCACCGAGTTCTTTCTGAATAGCTTTCA
TTTGCTCGTTCAGATAGTACTCACGCTGGGATTTCTCCATCTGCTTTTTAACGCGGTTGCGAATGCGTTTCTCAACCTGCAGCAGATCGATTTCCGATTC
CATCATTGCCATCAGATATTCCAGACGTTCGTTAACGTCGGACATCTCCAGAACGGACTGTTTGTCAGCCAGTTTCAGCGGCATATGTGCAGCAATGGTA
TCCGCCAGACGCGCCGGGTCGTCGATGCTATTCAGCGACGTCAGCACTTCTGGTGGGATTTTTTTGTTCAGCTTGATGTAGCCTTCGAACTGGCTGATTG
CAGTACGCACCAGCACTTCCTGTTCCCGCTCATCAATGGTCGGCGACTCCAGATACTCCGCCTTCGCAGAAAAGTGTTCGCCATTGTCAGAGAGCGCAGA
AATACGCGCGCGCTGTAACCCCTCGACCAGCACTTTGACGGTGCCGTCAGGCAGTTTCAGCATCTGCAATATAGAGGCCACGGTCCCGACGGTGAAAAGA
TCGTTTACACCTGGCTCATCCGTTGAAGCTTCTTTCTGCGCGACCAGCATAATTTTTTTATCATGGTCCATCGCCGCTTCCAGACAACGGATGGATTTTT
CCCGCCCGACAAATAAGGGGATGACCATGTGCGGATAAACCACCACATCGCGCAGCGGCAATACGGGGATTTCAATGCGTTCAGAACGCTCAGGATTCAT
AGAGCTCTCTCTTAGTTTAATTTCCGCCAGGTAATCAGATGACACGACTGTGCTTCACGCCATCTATTAACATGTACGTCAGTATATGGGGATGTTTCCC
CACATTCAACGCCGAGAATAGAGGAAAAATTAAAGGGGAGATAAAATCCCCCTTTTTTGGTTAACTAATTGTATGGAAATGGTTAATTATTCACCAGATG
CCTGTTGCGCTTCCGGCTTACCATAAATCAGCAACGGTTTGCTTTGACCATCAATTACCGACTCGTCGATAACCACTTTTTCGACATCTTCCATGGACGG
CAGATCGTACATGGTATCGAGCAGTGCGGCTTCTACGATAGAACGCAGGCCACGGGCACCGGTTTTACGCGCCATCGCTTTCTTAGCGATAGCATCCAGC
GCCTCGTCACGGAATTCCAGATCCACGCCTTCCAGATTAAACAGCGCCTGATACTGCTTGGTCAGGGCGTTTTTCGGCTCTTTGAGGATCTGAATCAGAG
CTTCTTCGCTCAGTTCATTCAACGTTGCGACAACCGGCAGACGACCAATGAACTCAGGGATCAGACCAAACTTGATCAGATCTTCCGGTTCAACCTGCGC
CAGCAGCTCGCCTTCGCTTGCTTTGTCGGACTTCGCTTTTACCGTCGCGCCAAAACCAATGCCGGAACCGGTTTCTACACGATGGGAAATCACTTTATCC
AGACCGGCAAACGCACCGCCACAGATAAACAGGATCTTAGAGGTATCAACCTGCAAGAATTCCTGTTGCGGATGTTTACGCCCACCTTGCGGCGGAACAG
CAGCTACCGTACCTTCGATCAGTTTCAACAGTGCCTGCTGTACGCCTTCACCGGAAACGTCTCGGGTAATGGACGGGTTGTCTGACTTACGAGAAATCTT
GTCGATTTCATCGATGTAGACAATCCCGCGCTGCGCTTTCTGTACGTCGTAATCGCACTTCTGCAACAGCTTCTGAATGATGTTTTCAACGTCTTCGCCC
ACATAACCGGCTTCGGTCAGCGTGGTTGCGTCAGCCATGGTGAACGGAACGTCCAGCAGGCGCGCCAGCGTTTCGGCCAGCAGCGTTTTACCGGAACCGG
TCGGACCGATCAGCAGAATGTTACTTTTGCCCAACTCGACGCCATTGCTGGTATCTCCGTTGCGCAGACGTTTGTAGTGGTTGTATACCGCGACCGCCAG
CACTTTTTTCGCCTGTTCCTGACCGATAACGTAATCGTCCAGGTGGTTGCGAATTTCATGCGGCGTCGGTAGCGCACTGCGTTCACGATGCGGTGCAACT
TCTTTAATCTCTTCGCGAATGATGTCGTTACATAAATCAACACATTCGTCGCAGATATACACGGATGGACCGGCAATCAGCTTGCGCACTTCATGCTGGC
TTTTGCCGCAAAAAGAGCAATACAGCAATTTGCCTGAGCCATCTTTGCGTTTATCTGTCATGGGTCAAAACCTCTTCTTTGTTCTTTGTGCCGCACACGA
CGACGCAAATGCCATTCTCAGGCGCAAGCCGCTTACAGCGTTGTGCCGCCCTGGATAAGTATAGCGGCACAGTTGCGCCTCTGGCATCAATTACGATGGG
TCAGAATCGAGTCGACCAGACCGTATTCCACCGCTTCAGGGGCGGAAAGGAAGCGATCGCGCTCGGTATCACGTTCAATCTGTTCTAATGATTGACCCGT
ATGAAGCGCCATAAGTTCATTCATGCGCCCTTTAACTTTCAGAATTTCACGGGCATGAATTTCGATATCGGTCGCCTGGCCCTGGTAGCCGCCCAACGGC
TGGTGAATCATCACGCGCGAATTCGGCAGGCAGAAACGTTTACCTTTTGCCCCTGCAGTCAGCAAGAAAGCGCCCATCGAGGCCGCCTGGCCCATACAGA
TGGTGCTGACATCAGGCTTGATAAACTGCATGGTGTCATAGATAGACATCCCGGCAGTAATCACCCCGCCTGGAGAGTTAATGTACAGATAGATATCTTT
TTCTGGGTTTTCTGCTTCCAGGAACAGCATCTGCGCCACAATCAGGTTAGCCATGTGGTCTTCAACCTGGCCAGTCAGAAAAATGACGCGTTCCTTAAGT
AGACGAGAATAGATATCAAAAGAGCGCTCACCTCGTGAGGTCTGTTCAATGACCATCGGCACCAGCGCCATATGGGGTGCAAAGTTATCTCGTTCGCCGC
TGTATGACATTTCCGTCTCCTGGATAAAATTGAAAAAACCTGCTGTACCGATTGTAACCTTATGGACGGATTATCAGCTAGTCCCTGTGTTATGGGTACG
GCATCACCATATTTCAAGCATAACAATCTTTTGTTGTTACGCTAACACCGAAAGAGGCTTTTCGCACGGTTCCATGCAAAATTCATGACAAAAAAGCCCA
CCACCTGGCGGTGACGGGCCTTTGTGCGAATTTAGCGCGTTATGCTACGTAAATTACGCCTGCTGGTTCATCAGCTCGTTGAAAGTGGTTTCTTTTTCAG
TCACTTTCGCTTTCGCCAGTACAGCTTCAACAGCCTGTTCTTCCAGAGCAACATTGCGCATGTTGTCCATCAGTTCTTTGTTTTTGCTGTAGAACTCGAT
AACTTCTTTCGGATCTTCGTACGCAGAAGCCATCTCTTCGATCAGGCCTTTCACGCGCTCTTCGTCAGCTTTCAGCTCGTTGGTGCGGATAACTTCGCCC
AGCAGCAGGCCAACAACTACGCGACGTTTAGCCTGTTCTTCGAACAGTTCGCGCGGCAGTTCCAGAGCTTGTTTTTCGTTGCCACCGAAACGCTGTGCAG
CCTGGCGACGCAGAACGTCGATTTCACTGTCGATCAGCGCAGCCGGTACGTCGATGTCGTTAGCTTTTACCAGACCTTCGATCGCCTGAGACTTAACGCG
GTTACGGATGGCGCTCTTCAGCTCGCGCTCCATGTTTTTACGCACTTCAGCGCGCAGACCTTCTACGGAACCATCTTCAACGCCGAAACGTTTGATGAAT
TCTGCAGTCAGTTCCGGCAGTTCACGCTCTTCAACTTTCTTCAGGTTGATAGCGAATTTCGCTGCTTTACCTTTCAGGTTTTCTGCGTGGTATTCTTCCG
GGAAGGTCACGTCGATGGTGAACTCTTCGCCAGCTTTGTGGCCTTTGATACCGTCTTCAAAGCCCGGGATCATACGACCCTGGCCCATCGCCAGTACGAA
ATCAGACGCTTTACCGCCTTCGAACTCTTCGCCGTCTACAGAACCGGTGAAGTCGATGGTTACGCGGTCTTCTGCTTCAACAGCGCCGTCTTTTTCTTTC
CAGGTCGCCTGCTGTTTACGCAGAGTATCCAGCATGCCGTCAACGTCAGCGTCGGTCACTTCAACGATCGGTTTTTCAACTTCGATCGCTTCCAGACCCT
GCAGTTCAACTTCCGGATAAACTTCAAACTCTACAGAGTAGGTGAAGTCTTCACCCAGCTTGTATTCGCCCGGAACATAAGTCGGTGCGCCAGCCGGATT
GATTTTTTCTTTAATGATGGCGTCAATGAAGTTACGGCTCATCAGGTCACCCAGAACGTCCTGGCGTACAGACGCGCCATAACGCTGAGCAACGATATTC
ATTGGCACTTTGCCTTTGCGGAAGCCGTCAATACGTACTTTTTTCGCAACGTTGACCAGCTCGCTTTTAACAGCGGTCTCGATGCTGTCAGCAGCGATAG
TAATCGTTACACGGCGGCCAAGGCCTTGAGTGGTTTCAACTGAAACTTGCATCTTGTTACCTCAAAAAATCACAGTGCTCGGTCAACTCTTACCCCGCAA
GCACAGGTTGTTGGCTTCGCGGAACCGGGATGTTCTTATAATCAATCACATTCCCTGTTACCAGAATCATCCCGAAAGCATTCAAATAAGACGCGGCATT
ATAGCGGCATCACTTTTATGAGTCGAGAACGGTTATTGCGCGCTGTCGCGTATTTTTTCACAATTCCCGGGCAATTTTCGTCTGAATGCTGGGCAAAAAG
CGCAAAATCCAGACAAAACAAAACGGCCCGCAGGCCGTTTTTCATAAAATCTTTAGCAACATACTGGAAAAGCGCCGACAGTTGCAAATGCGTTTTTACG
CGATGCTTCCTGCTCCACGACAGGGAGGAGAGGCAAAGACGGTGTCCTGCAACCCTTCCCACTCCTTAATAGTGTAAGTATGCAGAGCCAGCGCATGAAC
GGTAGTAGAGAGTTCCTCCGCTAAAGTACTGTAAATCATTCGATGACGATTCAGAAAACGTTCACCCGTAAAACGATCGCTGACCAGCACAACTTTAAAA
TGGCTTTCAGAGCCGGCTGGGACATTGTGACGATAGCTTTCATCCACTACTTCGAGGAATACGGGTTGGAACGCCGCCCTTAATTTTTCTTCTATCCGCT
CACGTATCATCATGAAATATCTCCTCCGACAACGCTGAGATGTCATCCATCCCTTTAAATACTAGCCGCTTTTACCGTTTCCATTGCAGCTTAACAACAA
ATATTTAGGTTTCGTCCTGGTTTTCCCGTCAAGCGTATGAAGTTTACTGATTTAAAGATTGAAACACAGGCCTCGCATCAGCGTTTCTTTTACCAGGGGC
GATTATTTCGTCAACATGATGAATTTACATGCCTTACCCACTTCCCCTCGCCGTTGGCAATGTTATGATGGCGGGAATTTTTACCAAACACGCTTAAGAG
TCTCTGAGAGCCCGAACATGTTCAAAAAATCCTCTTCCCGTTAGTTGCTCTGTTTATGCTTGCAGGATGCGCAAAACCGCCAACAACTATTGAAGTTTCC
CCGACGATTACACTGCCACAGCAGGATCCAAGCCTGATGGGCGTCACCGTAAGCATTAATGGTGCCGATCAGCGTACCGATCAGGCGCTGGCAAAAGTCA
CCCGCGATAATCAAATCGTTACCCTGACCGCCTCCCGCGATCTGCGTTTCCTGCTGCAAGAAGTGCTGGAAAAACAGATGACCGCCCGTGGATACATGGT
TGGTCCGAATGGCCCGGTTAATCTGCAAATCATCGTTAGCCAACTGTATGCTGACGTGTCCCAGGGCAACGTGCGCTACAACATCGCGACCAAAGCGGAT
ATCGCCATCATCGCTACCGCGCAGAATGGCAACAAAATGACCAAAAACTATCGTGCCAGCTACAACGTTGAAGGTGCATTCCAGGCCTCCAACAAAAATA
TCGCCGATGCGGTTAACAGTGTGCTGACCGATACCATCGCTGATATGTCTCAGGACACCAGCATCCACGAATTCATCAAGCAGAACGCGCGTTAATTTCT
GCCCTCTGGCCCGGTGCAAGCCGGGCCTGTAGACGCCCATGTCCAGTCAATATTTACGTATTTTTCAACAGCCGCGTTCAGCCATATTGCTGATCCTGGG
TTTTGCTTCCGGGCTACCGCTCGCCCTGACGTCCGGCACCTTACAGGCCTGGATGACGGTCGAGAATATCGATCTCAAAACCATTGGTTTCTTCTCTCTG
GTAGGCCAGGCTTACGTTTTTAAATTCCTCTGGTCACCACTGATGGACCGCTACACGCCCCCATTTTTCGGGCGGCGGCGCGGTTGGCTGCTCGCCACGC
AAATTCTGTTATTAGTCGCCATTGCGGCGATGGGTTTTCTCGAACCAGGCACCCAGCTCCGCTGGATGGCGGCACTGGCGGTGGTGATCGCTTTTTGCTC
TGCCTCCCAGGATATTGTCTTCGATGCGTGGAAAACCGATGTGCTCCCGGCAGAAGAACGTGGTGCGGGCGCGGCAATCAGCGTGCTGGGTTACCGTTTA
GGGATGCTGGTTTCCGGCGGCTTAGCCCTGTGGCTGGCAGATAAATGGCTGGGCTGGCAGGGCATGTACTGGTTGATGGCGGCGCTGTTGATCCCCTGTA
TTATCGCGACGTTGCTTGCACCAGAACCCACCGACACCATTCCTGTGCCCAAAACGCTGGAACAAGCGGTTGTTGCACCTCTGCGAGATTTCTTTGGTCG
CAATAATGCCTGGCTTATTTTGCTTCTTATCGTGCTGTATAAGCTGGGCGACGCATTCGCTATGAGCCTGACAACCACGTTTTTGATTCGTGGCGTCGGG
TTTGATGCGGGTGAAGTAGGCGTGGTTAACAAAACGCTTGGCTTACTGGCGACCATTGTTGGCGCATTGTACGGTGGGATTTTGATGCAGCGCCTGTCGC
TGTTCCGTGCACTGCTGATTTTCGGCATTTTACAAGGTGCATCTAACGCCGGTTACTGGCTGCTGTCGATTACTGATAAGCATCTCTACAGCATGGGCGC
AGCCGTCTTTTCGAAAACCTCTGTGGCGGGATGGGTACATCAGCCTTTGTCGCGCTGTTAATGACGCTGTGTAATAAGTCATTTTCCGCTACTCAATTTG
CCCTGCTCTCAGCGCTTTCTGCTGTAGGGCGAGTTTATGTCGGCCCCGTGGCGGGTTGGTTTGTTGAAGCACACGGCTGGTCGACATTCTATCTATTCTC
CGTCGCCGCTGCCGTACCAGGGCTTATCTTGTTGCTGGTTTGCCGCCAGACGCTTGAATATACACGAGTAAATGACAACTTTATCTCCCGTACCGAATAT
CCTGCAGGTTATGCCTTTGCCATGTGGACACTGGCGGCGGGCATCAGCCTGTTGGCCGTGTGGTTACTGCTGTTGACGATGGACGCGCTGGATTTGACGC
ACTTCTCTTTCCTGCCTGCGCTGCTGGAAGTCGGGGTTTTAGTCGCCCTTTCTGGCGTTGTGCTTGGTGGTTTGCTGGATTATCTGGCGCTACGTAAAAC
ACATCTGACGTAATCTGTAAATATTATTTAGCTGTAGTAATCACTCGCCGTAATTATTACGGCTAAATAAACATCAGCATCGCTTATTAATATTTGTTCT
TTTGTGCGGCTTAGCGTCTGGAAATTATTGACGCAATTTATGAATTCTATTTTTCTTACACGATTCAGCTAATGAGTCCTTATTTTCTCACCACCCAGTT
GTCACTTCAATGATAATTATTTGTTAAATAATTGTTTTATTTTATATTGATTATACCAATTGCCCGCCCAAACTCCTTCTGCACTCCCCTTTCGTTATAA
CGCCCTTTTGCAACAGCTTCTTAAAATCAACTTGATATGTTTTGCAACATATGTGACCTGACAGCCAAATCCAAGTAACAGGAATTTAATCATGTTTACA
GTAATGTAACCTTCCCGTAAAATGCCCACACACTTTAAACGCCACCAGATCCCGTGGAATTGAGGTCGTTAAATGAGACTCAGGAAATACAATAAAAGTT
TGGGATGGTTGTCATTATTTGCAGGCACTGTATTGCTCAGTGGCTGTAATTCTGCGCTGTTAGATCCCAAAGGACAGATTGGTCTGGAGCAACGTTCACT
GATACTGACGGCATTTGGCCTGATGTTGATTGTCGTTATTCCCGCAATCTTGATGGCTGTTGGTTTCGCCTGGAAGTACCGTGCGAGCAATAAAGATGCT
AAGTACAGCCCGAACTGGTCACACTCCAATAAAGTGGAAGCTGTGGTCTGGACGGTACCTATCTTAATCATCATCTTCCTTGCGGTACTGACCTGGAAAA
CCACTCACGCTCTTGAGCCTAGCAAGCCGCTGGCACACGACGAGAAGCCCATTACCATCGAAGTGGTTTCCATGGACTGGAAATGGTTCTTCATCTACCC
GGAACAGGGCATTGCAACCGTGAATGAAATCGCTTTCCCGGCGAACACTCCGGTGTACTTCAAAGTGACCTCCAACTCCGTGATGAACTCCTTCTTCATT
CCGCGTCTGGGTAGCCAGATTTATGCCATGGCCGGTATGCAGACTCGCCTGCATCTGATCGCCAACGAACCCGGTACTTATGACGGTATCTCCGCCAGCT
ACAGCGGCCCGGGCTTCTCAGGCATGAAGTTCAAAGCTATTGCAACACCGGATCGCGCCGCATTCGACCAATGGGTCGCAAAAGCGAAACAGTCGCCGAA
CAGCATGTCTGACATGGCAGCGTTCGAAAAACTGGCCGTGCCTAGCGAATACAACCAGGTGGAATATTTCTCCAACGTGAAACCAGACTTGTTTGCCGAT
GTGATTAACAAGTTTATGGCTCACGGTAAGAGCATGGACATGACCCAGCCAGAAGGTGAGCACAGCGCACATGAAGGTATGGAAGGCATGGACATGAGCC
ACGCGGAATCCGCCCATTAAAGGGGTTGAGGAAGAATAAAGATGTTCGGAAAATTATCACTTGATGCAGTCCCGTTCCATGAACCTATCGTCATGGTTAC
GATCGCTGGCATTATTTTGGGAGGTCTGGCGCTCGTTGGCCTGATCACTTACTTCGGTAAGTGGACCTACCTGTGGAAAGAGTGGCTGACCTCCGTTGAC
CATAAACGTCTCGGTATCATGTATATCATCGTGGCGATTGTGATGTTGCTGCGTGGTTTTGCTGACGCCATTATGATGCGTAGCCAGCAGGCCCTTGCCT
CTGCGGGCGAAGCGGGCTTCCTGCCACCTCACCACTACGATCAGATCTTCACCGCACACGGCGTGATCATGATCTTCTTCGTGGCGATGCCTTTCGTTAT
CGGTCTGATGAACCTGGTGGTTCCGCTGCAGATCGGCGCGCGTGACGTTGCGTTCCCGTTCCTCAACAACTTAAGCTTCTGGTTTACCGTTGTTGGTGTG
ATTCTGGTTAACGTTTCTCTCGGCGTGGGCGAATTTGCGCAGACCGGCTGGCTGGCCTATCCACCGCTATCGGGAATAGAGTACAGTCCGGGAGTCGGTG
TCGATTACTGGATATGGAGTCTCCAGCTATCCGGTATAGGTACGACGCTTACCGGTATCAACTTCTTCGTTACCATTCTGAAGATGCGCGCACCGGGCAT
GACCATGTTCAAGATGCCAGTATTTACCTGGGCATCACTGTGCGCGAACGTACTGATTATTGCTTCCTTCCCAATTCTGACGGTTACCGTCGCGTTGTTG
ACCCTGGATCGCTATCTGGGCACCCATTTCTTTACCAACGATATGGGTGGCAACATGATGATGTATATCAACCTGATTTGGGCCTGGGGCCACCCGGAAG
TTTACATCTTGATCCTGCCTGTATTCGGTGTGTTCTCCGAAATTGCGGCAACCTTCTCGCGTAAACGTCTGTTTGGTTATACCTCGCTGGTATGGGCAAC
CGTCTGTATCACCGTGCTGTCGTTCATCGTCTGGCTGCACCACTTCTTTACGATGGGTGCGGGCGCGAACGTAAACGCCTTCTTTGGTATCACCACGATG
ATTATCGCCATCCCTACCGGGGTGAAGATCTTCAACTGGCTGTTCACCATGTATCAGGGCCGCATCGTGTTCCATTCTGCGATGCTGTGGACCATCGGTT
TTATCGTCACCTTCTCGGTAGGCGGTATGACTGGCGTGCTGCTGGCAGTACCGGGCGCGGACTTCGTTCTGCATAACAGCCTGTTCCTGATTGCGCACTT
CCATAACGTGATCATCGGCGGCGTGGTCTTCGGCTGCTTCGCAGGGATGACCTACTGGTGGCCTAAAGCGTTCGGTTTCAAACTGAACGAAACCTGGGGT
AAACGCGCGTTCTGGTTCTGGATCATCGGCTTCTTCGTTGCCTTTATGCCACTGTATGCGCTGGGCTTCATGGGCATGACCCGTCGTTTGAGCCAGCAGA
TTGACCCGCAGTTCCACACCATGCTGATGATTGCAGCCAGCGGTGCGGTACTGATTGCGCTGGGTATTCTCTGCCTCGTTATTCAGATGTACGTTTCTAT
TCGTGACCGCGACCAGAACCGTGACCTGACTGGCGACCCTTGGGGTGGCCGTACGCTGGAGTGGGCAACCTCTTCCCCGCCTCCGTTCTATAACTTTGCC
GTTGTGCCGCACGTTCACGAACGTGATGCATTCTGGGAAATGAAAGAGAAAGGCGAAGCGTACAAAAAGCCTGACCACTATGAAGAAATTCATATGCCGA
AAAACAGCGGTGCCGGTATCGTCATTGCGGCTTTCTCCACCATCTTCGGTTTCGCCATGATCTGGCATATCTGGTGGCTGGCGATTGTTGGCTTCGCAGG
CATGATCATCACCTGGATCGTGAAAAGCTTCGACGAGGACGTGGATTACTACGTGCCGGTGGCAGAAATCGAAAAACTGGAAAACCAGCATTTCGATGAG
ATTACTAAGGCAGGGCTGAAAAATGGCAACTGATACTTTGACGCACGCGACTGCCCACGCGCACGAACACGGGCACCACGATGCAGGCGGAACCAAAATC
TTCGGATTTTGGATCTACCTGATGAGCGACTGCATTCTGTTCTCTATCTTGTTTGCTACCTATGCCGTTCTGGTGAACGGCACCGCAGGTGGGCCGACAG
GTAAGGACATTTTCGAACTGCCGTTCGTTCTGGTTGAAACTTTCTTGCTGTTGTTCAGCTCCATCACCTACGGCATGGCGGCTATCGCCATGTACAAAAA
CAACAAAAGCCAGGTTGTCTCCTGGCTGGCGTTGACATGGTTGTTTGGTGCCGGATTTATCGGGATGGAAATCTATGAATTCCATCACCTGATTGTTAAC
GGCATGGGTCCGGATCGCAGCGGCTTCCTGTCAGCATTCTTTGCGCTGGTCGGCACGCACGGTCTGCACGTCACTTCCGGTCTTATCTGGATGGCGGTGC
TGATGGTGCAAATCGCCCGTCGCGGCCTGACCAGCACTAACCGTACCCGCATCATGTGCCTGAGCCTGTTCTGGCACTTCCTGGATGTGGTTTGGATCTG
TGTGTTCACTGTTGTTTATCTGATGGGGGCGATGTAATGAGTCATTCTAACGCAAGCAGCGGCGCATCCCATGGCAGCGTAAAGACCTACATGACAGGCT
TTATCCTGTCGATAATCCTGACGGTAATTCCGTTCTGGATGGTGATGACAGGGGCTGCCTCTCCGGCCGTAATTCTGGGAACAATCCTGGCAATGGCAGT
GGTACAGATTCTGGTGCATCTGGTGTGTTTCCTGCACATGAATACCAAATCAGATGAAGGCTGGAATATGACGGCATTTGTCTTCACCGTGCTAATCATC
GCCATCCTGGTTGTGGGCTCCATTTGGATTATGTGGAACCTCAACTACAACATGATGATGCACTAAGAGCGGCGGTTATGATATTTAAGCAATACCTGCA
AGTAACGAAACCAGGCATCATCTTTGGCAACCTGATCTCGGTGATTGGGGGATTCTTGCTGGCCTCAAAGGGCAGCATTGATTATCCCCTGTTTATCTAC
ACGCTGGTTGGGGTGTCACTGGTTGTGGCGTCGGGTTGTGTGTTTAACAACTACATCGACAGGGATATCGACAGAAAGATGGAAAGGACGAAGAATCGGG
TGCTGGTGAAAGGCCTGATCTCTCCTGCTGTCTCGCTGGTGTACGCCACCTTGCTGGGTATTGCTGGCTTTATGCTGCTGTGGTTTGGCGCGAATCCGCT
GGCCTGCTGGCTGGGGGTGATGGGCTTTGTGGTTTATGTCGGCGTTTATAGCCTGTACATGAAACGTCATTCTGTCTACGGCACATTGATTGGTTCGCTC
TCCGGCGCTGCGCCTCCGGTGATCGGTTACTGTGCGGTAACCGGCGAGTTCGATAGCGGCGCAGCGATCCTGCTGGCTATCTTCAGCCTGTGGCAGATGC
CTCACTCTTATGCCATCGCCATTTTCCGCTTTAAGGATTATCAGGCGGCAAACATTCCGGTACTGCCGGTGGTGAAAGGCATTTCGGTGGCGAAGAATCA
CATCACGCTGTATATCATCGCCTTTGCCGTTGCCACGCTGATGCTCTCTCTTGGCGGCTACGCTGGGTATAAATATCTGGTGGTCGCCGCTGCGGTGAGC
GTCTGGTGGTTAGGCATGGCTCTGCGCGGCTATAAAGTTGCTGATGACAGAATCTGGGCGCGCAAGCTGTTCGGTTTCTCTATCATCGCCATCACTGCCC
TCTCGGTGATGATGTCCGTTGATTTTATGGTGCCGGACTCGCATACGCTGCTGGCTGCTGTGTGGTAACACAACCTCTCAGTTAAAAAGGTGCTACGGCA
CCTTTTTTCTTAGCATTAGAATCATATCCCTCTCGAAATATTTACTAAAAAATCCGCATGTTTACCCCATTCGTTTGCCGCTTTACACTAGTCGCGAATT
TAAAACAGAGGTGGTAATGAACGATTATAAAATGACGCCAGGTGAGCGGCGCGCGACCTGGGGTTTAGGCACCGTTTTCTCGTTGCGCATGCTGGGCATG
TTCATGGTTCTGCCGGTTCTGACCACGTACGGCATGGCTCTGCAAGGTGCCAGCGAAGCATTAATCGGTATTGCCATTGGTATTTATGGTCTGACTCAGG
CCGTTTTTCAGATTCCGTTTGGCCTGCTTTCAGACCGCATTGGTCGCAAACCATTAATTGTCGGTGGGCTGGCGGTGTTTGCCGCCGGTAGCGTTATCGC
TGCGCTCTCTGACTCCATCTGGGGAATTATTCTGGGTCGGGCGCTACAAGGCTCCGGTGCGATTGCCGCTGCCGTTATGGCGCTGCTTTCCGATCTCACG
CGCGAACAAAACCGCACCAAAGCGATGGCGTTTATCGGCGTGAGCTTTGGCATTACCTTTGCCATTGCGATGGTGCTTGGCCCGATCATCACTCACAAAC
TTGGGCTGCACGCGCTGTTCTGGATGATCGCTATTCTGGCAATAACCGGCATTGCGTTGACCATTTGGGTTGTGCCCAACAGTAGCACTCACGTACTTAA
TCGTGAGTCCGGAATGGTGAAAGGCAGTTTCAGTAAAGTGCTGGCGGAACCGCGGCTGCTGAAACTCAACTTTGGCATTATGTGTCTGCATATTTTGCTG
ATGTCGACCTTTGTTGCCCTGCCCGGACAGATGGCTAATGCGGGGTTCCCGGCGGCTGAACACTGGAAGGTCTACCTGGCAACGATGTTAATCGCCTTTG
GCTCGGTCGTGCCTTTCATTATCTACGCTGAAGTTAAGCGCAAAATGAAGCAAGTCTTTGTCTTCTGCGTCGGGTTGATCGTGGTTGCGGAAATTGTGTT
GTGGAACGCACAAACGCAGTTCTGGCAACTGGTGGTCGGCGTGCAGCTTTTCTTTGTAGCGTTTAATTTGATGGAAGCCCTTCTGCCTTCACTTATCAGT
AAAGAATCGCCAGCAGGTTACAAAGGTACGGCGATGGGTGTTTACTCCACCAGCCAGTTTCTTGGCGTGGCGATTGGCGGTTCGCTGGGCGGCTGGATTG
ACGGCATGTTTGACGGTCAGGGCGTATTTCTCGCTGGCGCAATGCTGGCCGCAGTGTGGCTGGCAGTCGCCAGTACCATGAAAGAACCGCCGTATGTCAG
CAGCTTGCGCATTGAAATCCCGGCGGACATTGCCGCAAACGAAGCGTTAAAAGTACGTTTGCTGGAAACTGAAGGCGTCAAAGAAGTGTTGATTGCAGAA
GAAGAACATTCAGCGTACGTGAAAATCGACAGCAAAGTGACGAATCGCTTTGAGGTTGAACAGGCAATTCGTCAGGCATAAAAAAGAGGCGAATTGCCTG
CTGCGCTACGCTTATCAGGCCTACAAAGTTCCTGAGTGACAAACCTTTGTAGGCCGAATCAGGCGTTCATGCCGCATCTGACATGAACAAAGCGCAGGTT
GTCGCGATTAATCGCGGAAGTTTTTGAACTGGAACGGCTGACCGAGATCGCCACCACGTACCACCGCCATGACAGCCTGTAAATCATCACGAGATTTACC
CGTTACGCGGATCTCATCGCCCTGAATTTGCGCCTGCACTTTCAGTTTGCTGTCTTTGATCATTTTGACGATTTTCTTCTGAGTCGCGCTCTCAATGCCC
TGTTTCAGTTTCGCTTCCACAAACCAGGTTTTACCGCTATGAACGATATTTTCCGGTACATCCAGTGAACTGCCTTCAATGCCGCGCTTCAGCAACTTGG
CACGCAGAATATCCAGCAACTGATTGACCTGGAAGTCGGACTCGCTCAACACTTTGATGGTTTTGCTGGCGTCATTCAGCTCAAATGAGGCTTCAACGTT
ACGGAAGTCAAAACGGGACTCCACTTCGCGGCTCGCGTTATCGACCGCGTTACGTGCTTCCTGAAGATCAACTTCAGAGACAATATCGAAAGATGGCATC
TTTTCCTCTCCCTTCATTTTTGATGCGAAGCATAATACCTGCAAAGTTAAATAACCAACAGTCCTGCACCAGGACGTATCCCTTAATTGTGCATAGTCGC
AACAGCATGCACAATTAAGGGATAGCCTTATTGAACACCCGGAGTGGTTGCGGGTGAGGAGGAACAATGAAAATTACCGTATTGGGATGCGGTGCCTTAG
GGCAATTATGGCTTACAGCACTTTGTAAACAGGGTCACGAGGTTCAGGGCTGGCTGCGCGTACCGCAACCTTATTGTAGTGTGAATCTGGTTGAGACAGA
TGGTTCGATATTTAACGAATCGCTGACCGCCAACGATCCCGATTTTCTCGCCACCAGCGATCTGCTCCTGGTGACGCTGAAAGCATGGCAGGTTTCCGAT
GCCGTCAAAAGCCTCGCGTCCACACTGCCTGTAACCACGCCAATACTGTTAATTCACAACGGCATGGGCACCATCGAAGAGTTGCAAAACATTCAGCAGC
CATTACTGATGGGCACCACCACCCATGCCGCCCGCCGCGACGGCAATGTCATTATTCATGTGGCAAACGGTATCACGCATATTGGTCCGGCACGGCAACA
GGACGGCGATTACAGTTATCTGGCGGATATTTTGCAAACCGTATTGCCTGACGTCGCGTGGCATAACAATATTCGCGCCGAGCTGTGGCGCAAGCTGGCA
GTCAACTGTGTGATTAATCCACTGACCGCCACCTGGAATTGCCCGAATGGTGAATTACGTCATCATCCGCAAGAAATTATGCAGATATGCGAAGAAGTCG
CGGCAGTGATCGAACGCGAAGGGCATCATACTTCAGCAGAAGATTTGCGTGATTACGTGATGCAGGTGATTGATGCCACAGCGGAAAATATCTCGTCGAT
GTTGCAGGATATCCGCGCGCTGCGCCACACCGAAATCGACTATATCAATGGTTTTCTCTTACGCCGCGCCCGCGCGCATGGGATTGCCGTACCGGAAAAC
ACCCGCCTGTTTGAAATGGTAAAAAGAAAGGAGAGTGAATATGAGCGCATCGGCACTGGTTTGCCTCGCCCCTGGTAGTGAAGAGACTGAAGCCGTCACC
ACTATCGACCTCTTGGTTCGCGGCGGTATCAAAGTCACCACTGCCAGCGTCGCCAGCGATGGTAACCTGGCAATTACCTGCTCGCGCGGCGTAAAGATGC
TGGCGGATGCGCCGCTGGTCGAAGTGGCTGATGGCGAATATGACGTGATTGTGCTGCCTGGTGGCATCAAAGGCGCAGAGTGTTTTCGCGATAGCACCCT
GCTGGTTGAAACCGTTAAACAGTTCCACCGTTCCGGGCGTATCGTCGCGGCTATTTGCGCCGCGCCAGCCACCGTGCTGGTCCCGCACGATATCTTCCCG
ATTGGCAATATGACCGGCTTCCCGACGCTGAAAGACAAAATTCCCGCCGAACAATGGCAGGACAAGCGCGTCGTCTGGGATGCACGAGTAAAATTGCTGA
CCAGCCAGGGGCCGGGTACAGCTATCGACTTTGGTCTGAAAATTATCGACCTGCTGGTTGGCCGTGAAAAAGCCCATGAAGTGGCATCACAACTGGTGAT
GGCGGCAGGGATTTATAATTATTACGAGTAGTGTCGGATGCGGTAAGCGTCGCATCTGACCAGATGCGACGTTACAACCACATATTACGGGCGATACACC
TTCACATTGTTAAAGCCCTGCTCGCGCAGATAGAGCGCCTGCAGGCGGCTCATCACCCCGCGCTCACACCACAACAGCCAGGTTTTGCTCTGGTCGAGAT
CGCCAAATTTGGTGCTCAGTTTATAGAACGGCAGAGAAACCACATCAATCCCTTCGACTTTCAGTGGCTTATCTTCCTGTTCATCGATAGAACGGATATC
GAGGATCACGTCGTTCGGGCCGAAGCCATTGACGGTTTCCACTTCCACCACTTCCTGCTCGGTCTGCTGGGCGATTTCGCGGATATCAACGTTATTCGCT
TCCTCAACCACTTTATCGAGAATGCTGAAGTCGAACTTCTCTTCTTCCGCTTCAATCTTCGATTTAACCGCTTTCACCGTCGGGCTTTTGGAAATCACGC
CGCAATATTCCGGCATCGTGCGGGCAAAGTCTTCGGTGCCAATCTGGCGAGCCAGGTTGATGATGTGCTCTTTGTCGTAAGAGATCAGCGGACGCAGGAT
CAGCGTATCGGAGACGTTATCAATCAGGCGCAGGTTGGTCAGCGTCTGGCTGGACACCTGGCCCAGTGCTTCGCCAGTGACCAGCGCCTGTACGCCGTAA
CGTTCTGCCACTTTGGACGCGGCACGCACCATCATACGTTTGAGGATAACGCCCATCTGACCGTCGTCGATTTTCTCGAGAATTTCCCCGACGACCGGTT
CGAAATTAATAGCGACAAAACGCACGCGGTGGGAGCTGCCAAAGCGGTTCCACAGATAATGCGCCACCTGACGCACGCCAATTTCATGCGCCGCGCCGCC
GAGGTTAAAGAAGCAGTAATGCACGCGGCAGCCGCGACGCATCAACATATAACTGGAAACACCGGAGTCGAAACCACCGGAAATGAGCGACAGCACATCT
TCCTGGGTACCAATCGGGAAACCGCCAATACCTTCGTAGCGGCCTTTAATTAGCAGGAGGCGATCGTCTTCCACTTCCAGATGGACAGTCACATCCGGAT
TGGTCAGCTTCACGCGCGCGGACTCAATATGCTGATTTAAACCGCCGCCGACGTAACGTTCCACATCAATCGAGCTAAAATCATGTTTGCCACGGCGCTT
CACGCGCACGCAGAAGGTTTTGCCTTCCAGCTGATCGCGATACTGAACCAACGCTTTCTCGAAAATATCGTGCATGTCGGTAAACGGCACGTCTTCGACT
TCGAGAATATGGTGGATACCCGGAATACGGGTCAGGGCGTCGCGAATAGCCAGACGCTGGTTTTCATCTTTTGCGCGAACTTCGATGTTATCCCAGTGGC
GGACGACAGCGAGCGTCTCATCATAGTGCTTTAAAACGTTACGAATGTTCCCGGTAAGGATTTTTATAAAGCGCAAGCGCACAGATTGGCTTTTGATGGT
GATTTCCGGGAACAATTTAATGATAAACTTCATGGCGGCAATGGTTCGTTGGCAAGCCTTAAGCGACTTGTATAGGGAAAAATACAGCAGCCCACACCTG
CGGCTGCATCCAGGCGCGGAAGTATACCACTAACATCGCTTTGCTGCGCACATCACCTTACCATTGCGCGTTATTTGCTATTTGCCCTGAGTCCGTTACC
ATGACGGGGCGAAAAATATTGAGAGTCAGACATTCATTATGCCGAAGAAAAATGAGGCTCCCGCCAGCTTTGAAAAGGCGCTGAGCGAGCTGGAACAGAT
TGTAACCCGTCTGGAAAGTGGCGACCTGCCGCTGGAAGAGGCGCTGAACGAGTTCGAACGCGGCGTGCAGCTGGCACGTCAGGGGCAGGCCAAATTACAA
CAAGCCGAACAGCGCGTACAAATTCTGCTGTCTGACAATGAAGACGCCTCTCTAACCCCTTTTACACCGGACAATGAGTAATGGACTTTCCGCAGCAACT
CGAAGCCTGCGTTAAGCAGGCCAACCAGGCGCTGAGCCGTTTTATCGCCCCACTGCCCTTTCAGAACACTCCCGTGGTCGAAACCATGCAGTATGGCGCA
TTATTAGGTGGTAAGCGCCTGCGACCTTTCCTGGTTTATGCCACTGGTCATATGTTCGGCGTTAGCACAAACACACTGGACGCACCCGCTGCCGCCGTAG
AGTGTATCCACGCTTACTCATTAATTCATGATGATTTACCGGCGATGGATGATGACGATCTGCGTCGCGGTTTGCCGACCTGCCATGTGAAGTTTGGCGA
AGCAAACGCGATTCTCGCTGGTGACGCTTTACAAACGCTGGCGTTCTCGATTCTAAGCGATGCCGATATGCCGGAAGTGTCAGATCGCGACAGAATTTCG
ATGATTTCTGAGCTGGCGAGCGCCAGCGGTATTGCCGGAATGTGCGGTGGTCAGGCATTAGATTTAGACGCTGAAGGCAAACACGTACCTCTGGACGCGC
TTGAGCGTATTCATCGTCATAAAACCGGCGCATTGATTCGCGCCGCCGTTCGCCTTGGTGCATTAAGCGCCGGAGATAAAGGACGAAATGCACTGCCAGT
ACTCGACAAGTATGCAGAGAGCATCGGCCTTGCCTTCCAGGTTCAGGATGACATCCTGGATGTGGTGGGAGATACTGCAACGTTGGGAAAACGCCAGGGT
GCCGACCAGCAACTTGGTAAAAGTACCTACCCTGCACTTCTGGGTCTTGAGCAAGCCCGGAAGAAAGCCCGGGATCTGATCGACGATGCCCGTCAGTCGC
TGAAACAACTGACTGAACAGTCACTCGATACCTCGGCACTGGAAGCGCTAGCGGACTACATCATCCAGCGTAATAAATAAACAATAAGTATTAATAGGCC
CCTGATGAGTTTTGATATTGCCAAATACCCGACCCTGGCACTGGTCGACTCCACCCAGGAGTTACGACTGTTGCCGAAAGAGAGTTTACCGAAACTCTGC
GACGAACTGCGCCGCTATTTACTCGACAGCGTGAGCCGTTCCAGCGGGCACTTCGCCTCCGGGCTGGGCACGGTCGAACTGACCGTGGCGCTGCACTATG
TCTACAATACCCCGTTTGACCAGTTAATCTGGGATGTGGGGCATCAGGCTTATCCGCATAAAATTTTGACCGGGCGCCGCGACAAAATCGGCACCATCCG
TCAGAAAGGTGGCCTGCACCCGTTCCCGTGGCGCGGCGAAAGCGAATATGACGTATTAAGCGTCGGGCATTCATCAACCTCCATCAGTGCCGGAATTGGG
ATCGCAGTTGCTGCCGAGAAAGAAGGCAAAAATCGCCGCACCGTCTGTGTCATTGGCGATGGCGCGATTACTGCTGGCATGGCGTTTGAAGCGATGAATC
ACGCGGGCGATATCCGTCCTGATATGCTGGTGGTTCTCAACGACAATGAAATGTCGATTTCCGAAAATGTTGGCGCGCTCAACAACCATCTGGCGCAGCT
GCTTTCCGGTAAGCTTTACTCTTCACTGCGCGAAGGCGGAAAAAAGTTTTCTCTGGCGTGCCACCCATTAAAGAGCTGCTCAAACGTACCGAAGAACATA
TTAAAGGCATGGTAGTGCCTGGCACGTTGTTTGAAGAGCTGGGCTTTAACTACATCGGCCCGGTGGACGGTCACGATGTGCTGGGGCTTATCACCACGCT
TAAGAACATGCGCGACCTGAAAGGCCCGCAGTTCCTGCATATCATGACCAAAAAAGGTCGTGGTTATGAACCGGCAGAAAAAGACCCAATCACCTTCCAC
GCCGTGCCTAAATTTGATCCCTCCAGCGGTTGTCTGCCGAAAAGTAGCGGCGGTTTGCCAAGCTATTCAAAAATCTTTGGCGACTGGTTGTGCGAAACCG
CAGCGAAAGATAACAAGCTGATGGCGATTACTCCGGCGATGCGTGAAGGTTCCGGCATGGTCGAGTTTTCACGTAAATTCCCGGATCGCTACTTCGACGT
GGCAATTGCCGAGCAACACGCAGTGACCTTTGCTGCGGGTCTGGCGATTGGAGGCTACAAACCCATTGTCGCGATCTACTCCACCTTCCTGCAACGCGCC
TATGATCAGGTGCTGCATGACGTGGCGATTCAAAAGCTTCCGGTCCTGTTCGCCATCGACCGTGCGGGCATTGTTGGTGCTGACGGTCAAACCCACCAGG
GCGCTTTTGATCTCTCTTACCTGCGCTGCATACCGGAAATGGTCATTATGACCCCGAGCGATGAAAACGAATGTCGCCAGATGCTCTATACCGGCTATCA
CTATAACGATGGCCCGTCCGCGGTGCGCTACCCGCGCGGCAACGCAGTTGGCGTGGAACTGACGCCACTGGAAAAACTGCCAATTGGCAAAGGCATTGTG
AAGCGTCGTGGTGAGAAACTGGCGATCCTTAACTTTGGTACGCTGATGCCAGAAGCGGCGAAAGTCGCTGAATCGCTGAACGCTACGCTGGTCGATATGC
GTTTCGTGAAACCGCTTGATGAAGCGTTAATACTGGAAATGGCCGCCAGCCATGAAGCGCTGGTTACCGTAGAAGAAAACGCCATTATGGGCGGTGCAGG
CAGCGGCGTGAACGAAGTGTTGATGGCCCATCGTAAACCAGTACCCGTGCTGAACATTGGCCTGCTGGACTTCTTTATTCCACAAGGAACTCAGGAAGAA
ATGCGCGCCGAACTCGGCCTCGATGCCACCGGTATGGAAGCCAAAATCAAAGCCTGGCTGGCATAATCCCTACTCTACTCCTGCTATGCTTAAGAAATTA
TTCATGGCAGGAGTGGCAGCATGCAATACAACCCCTTAGGAAAAACCGACCTTCGTGTTTCCCGACTTTGCCTCGGCTGTATGACCTTTGGCGAGCCAGA
TCGCGGTAATCACGCATGGACACTGCCGGAAGAGAGCAGCCGTCCCATCATTAAACGCGCACTGGAAGGCGGCATAAATTTCTTTGATACCGCCAATAGC
TATTCCGATGGCAGCAGCGAAGAGATCGTCGGTCGCGCACTGCGGGATTTCGCCCGTCGTGAAGACGTGGTCGTTGCGACCAAAGTGTTCCATCGCGTTG
GTGATTTACCGGAAGGATTATCCCGTGCACAAATTTTGCGCTCTATCGACGACAGCCTGCTCCGTCTCGGCATGGATTATGTCGATATCCTGCAAATTCA
TCGCTGGGATTACAACACGCCGATCGAAGAGACGCTGGAAGCCCTGAACGACGTGGTAAAAGCCGGGAAAGCGCGTTATATCGGCGCGTCATCCATGCAC
GCTTCGCAGTTTGCTCAAGCACTGGAACTACAAAAACAGCACGGCTGGGCGCAGTTTGTCAGTATGCAGGATCACTACAATCTGATTTATCGTGAAGAAG
AGCGCGAGATGCTGCCGCTGTGTTATGAGGAAGGCGTGGCGGTCATTCCGTGGAGCCCGCTGGCGCGGGGCCGCCTGACGCGTCCTTGGGGAGAAACCAC
CGCACGACTGGTGTCTGATGAGGTGGGTAAAAATCTCTATAAAGAAAGCGATGAAAATGACGCGCAGATCGCAGAGCGGTTAACGGGCGTCAGTGAAGAA
CTCGGTACAACACGAGCACAAGTTGCGCTGGCCTGGTTGTTGAGTAAACCGGGCATTGCCGCACCGATTATCGGAACTTCTCGGGAGGAACAGCTTGATG
AGCTGTTGAACGCGGTGGATATCACTTTAAAGCCGGAACAGATTGCTGAACTGGAAACGCCGTATAAACCGCATCCGGTCGTAGGATTTAAATAGGTATG
CAGGCCTGATGAGACGTGACAAGTGTCACATCAGGCATCGGTGCACAACTACGACAGAATACCCAGCGGCCAGTGATGTCCAATAAAATACAGGATGCCA
GCGGAGATCACCCCGGCGACAATATCATCTATCATGATCCCCATGCCGCCATGTACATTGCGGTCAAACCAGCGGATCGGCCACGGCTTCCACATATCCA
GAATACGGAAAATCACAAATCCGGCGGTAACCCACTGCCAGTCATTGGTCGGCAGCGCCATGAGCGTAATCCACATACCAATAAATTCGTCCCAGACAAT
ACTGCCGTGATCGTGCACGCCCATGTCTTTCGCCGTTTGATGACAAAGATAGACGCCGATACAGATCCCCAGCATTACCACCAGCGAATAGAGCTGCCAG
GGCAAAAAGTCATCAGATACCAGAAGGGAATCGCCGCCAGCGACCCCATCGTGCCAGGAACGATTGGGCTTAATCCACTTCCGAATCCGACAGCAAGCAG
ATGCCACGGATTACTCATCTTCAGGCGACTTTTCGCGACATCTTTATGGCGTGGCAAAATGGTCATATCCTTTCCAGTCTAACGTGACAGGTTCGCCGTC
ACGAATAAAACAAAGCCCTTCGATATCGGCGGTCATTTGCCCGATACAGGTAAACGGTACGCCCAGGTGTCCGAGAGCTACATCCAGCGCGCCACGGTTC
AGTTCCGGCACAGTAAAACACAACTCGTAATCTTCACCGCCAGAGAGCGCCCAGCGCAGCGCCTGTTCCGGTTCAACATGGCGAGAAAGCGCATCAGAAA
ACGGCAGCAATGCCAGGTCAATACGTGCGCCGCAGTCGCTGGCTTTCACGATATGCCCGAGATCGGAAATCAGACCGTCAGAGAGATCGATAGCTGAATT
TGCCAGATCGCGCAGTGCCTGCCCCTGTAAAATACGCGGCGACGGACGGAGATGACGTTTGATCAAGTAGTCCGCATCTTTAGCATCGGCAACCTGCAAA
CGGTTTTGCAAAATCGCCAGCCCGGCAGCGCTATCGCCCGGTGTACCGGTCACATAGATCCAGTCACCCGGTTTCGCCCCAGAGCGCGTTAAGGCTCGTC
CCATCGGAACAAAGCCGTGGATACCCAACGTCATTGATAATGGCCCACGCGTGGTATCGCCGCCAATGAGTTGCATATCGTAATAATTGAGAAGATCAAA
CAAGCTGTCTCTGAAGGACTCAAGCCACGCTTCGTCTACGTCCGGTAAGGTTAATGCCAGCGTCAGCCAGGCCGGATCGGCCCCCATCGCTGCCAGATCG
CTTAGGTTCACCGCCAGTGCTTTATAAGCCAGATCAGCAGGATCGATATCAGGGAGGAAGTGGTTGCCCGCCACCAGCGTATCAGTGCTGATCGCCAGGG
TCTGTTTCTCGGGGATATTGAGAAGAGCGCAATCGTCGCCGATGCCCAGTTCGACATCAAGACGAGAACTTCTTACACGGTCAAAATAACGGGCAATCAG
GGAGAACTCGCCACATGCCATACGTTATGCCTCAGCAGGTAAAAAGAAAAGGCCGGCGATCATGGAACGGTCTTCCGTGAATCTACCGGCCTGGATATTA
CTTTTTGTTAGGGCGAATCACAGGTGCTGCTTTATCGAGTACGCCGTTGACGAACTTATGGCTGTCTTCTGCGCCGAACGATTTCGCCAGTTCGATCGCT
TCGTTAATGGCCACTTTGTATGGCACATCGCTACGTTTAGACAGCTCGTACAGCGCAATGCGCAGTACTGCTTTTTCTACCTGGCCCAGTTCTTCCAGCA
GACGGGACAGGTACGGCTTCATCAGTCCGTCGAGGTATGCGGTGTTAGTCGCCACCCCGGCCAGCAGCTCACGGAAGTACAGGACGTCAACGTCTTTTAC
ATCCTGTTCAGCCAGGAACTGGTATTCAACATCAGCGATGTCGTTCTGGGACAACTGCCAGGAGTAGAGCGCCTGGACGGCACACTCACGAGCGCGGCGA
CGAGCAGCAGGTTTCACGGATTTCCCCTTACTAATTTCAGGCCTTGATGGCTTTCAATACATTAATCATTTCAAGCGCGGTCAGTGCAGCTTCTGCACCT
TTGTTGCCAGCTTTGGTGCCAGCACGTTCGATCGCTTGTTCAATGCTTTCAGTGGTCAGAACCCCAAAAGCAACCGGAATTTCGCTGTCCTGGGCAACAT
GCGCCAGGCCGTTGCTTGCACCACCAGCGACATATTCAAAGTGGGCAGTGCCACCACGAATAACCGTACCCAGCGCAATCACCGCGTCGTATTTACCGGT
TTTAGCCAGTGCACCCGCCGCCAGCGGCAGCTCATAGGCACCAGGCACCCAAACAACGGTAATGTTTTCATCTTTTACCTGACCGATACGTTTCAGTGCG
TCAATTGCACCTTCCAGCAGGCTGTCATTGATAAAGTTGTTGAAACGCGCGATGGTGATGGCGACGCGAGCGTCCGGGGTAGCAACGTTAGCTTCAATAA
TGTTCATTTTCTTCCTTCGGGTTCGAGTATGGCCCCGCAGGGGGCGGATTTTAGCATAATATTTCGTGCGCTGCTTCCCTTTCGAGCCGGGAGATCATGC
CCCCACTAAATGCAGGCAAACATCCGGGCCTACATGACGTATCTCTTTGAATTTAAATTGGGGGGCGTCGGCTAATTTCTCAAGCCCTGGCAGCAAGCAT
AATCCACGGGCGTCGCTGCCTAATAGTTTAGGTGCGATATAGACAATCAGCTCATCGACTAACCCCGCCTGTAGCAATGCGCCAGCGAGCGTTGGCCCCG
CTTCCACCCAGATGCTGTTAATTTGCTGTTTACCCAGTTGCATCATCAGTACAACCAGATCCAGATGACCTTTATGCTCTGGAATCAGCAAGGTACGCAC
CGTTTCCGGCCACTCACGAGAATCATCCTGAGTACGCGCGAACCAGGTTTCGCCGGGCTGCTGCACAATGCGATGTTCCGGCGTCACGCGATTTTGGCTA
TCAATCACAATACGTACCGGCTGACGGAGATTTTGTTGCGGGTAGAGCCCCTGAGTTTGTTCATCCAGTTCAGACCAACGCACTGTTAAGGCTGGATCAT
CCGCCAGCACCGTGGCGCTGCTGGTTAAAATGGCATGACTTTGCGCGCGCAGTCGTTGTACGTCGCGTCGCGCCTGAGGTGAAGTGATCCACTGGCTTTC
GCCACTCGCCATCGCCGTGCGACCATCAAGCGATGCGCCAAGTTTTAACTGAATATAAGGAAAGCCGGTGCGCATCCGCTTGAGAAAGCCATTATTCAAT
TGCTCAGCTTCACTCATCATCAGCCCGTGGCTGACGTCAATGCCAGCCTGTTGCAAACGGTAAAGTCCACGTCCAGCGACCTGCGGATTGGGGTCTTGCA
TTGCAGCAACCACGCGCGCCACGCCCGCAGCAATTAACGCATCACAACACGGTGGCGTACGACCATGATGGCTACAGGGTTCGAGTGTGACATACGCCGT
TGCGCCTTTGGCTTTTTCGCCGGCCATGCGCAACGCGTGTACCTCGGCATGCGGTTCACCCGCTCGTTGATGGTAACCTTCACCGACAATTTCGCCATCT
TTGACAATGACGCACCCGACATTCGGGTTGGGATGCGTGGTAAAACGTCCTCGTTGCGCCAGCTTTAGCGCCCGCGCCATGTAATACTCGTCCTGCACGG
CTTAGTCCTCCAGGCGCGCGATCTCTTCGCCAAATTCTTTGATATCTTCGAAACTGCGGTAGACAGAGGCAAAACGGATATAGGCGACTTTATCGAGCTT
TTTCAATTGCTCCATCACCAGATTGCCAATCATCTTGCTCGGCACTTCGCGCTCACCGGTGGCGCGCAGCTGCGATTTTATATGATTGATTGCCATTTCG
ACGTCATCGGAACTCACCGGACGTTTTTCCAGCGCCCGCAGCATTCCGCTACGTAATTTCTCTTCATTAAACGGTTCACGCACGTCGTTGCTTTTTACAA
CACGCGGCATAACCAGCTCCGCCACTTCAAAGGTGGTGAAACGTTCATTACACACCAGACACTGCCGACGGCGGCGTACGGATGAACCCTCGCCCACGAG
ACGAGAGTCAATTACCTTAGTGTCCACGGCGAAACAGAATGGGCAATGCATACGGCGTCCTGACCAGGTGGTTAACAGAAATCTATTTTACCCTGAACTG
ACGATACAACAAAGGCGCAACGCTTTTGAGATAAAGGATCGATGCTTTCACTGCTTTTACCCTCTACCATTAGGCTAATTGCGACGAGAAAGGGACGACC
TATGAATACTAACGTTTTTCGACTGCTCCTGCTGGGAAGCCTGTTCAGCCTTAGCGCCTGTGTGCAGCAAAGTGAAGTGCGACAGATGAAACACAGCGTC
AGCACGCTGAACCAGGAGATGACGCAGCTCAATAAAGAAACGGTCAAAATCACTCAGCAAAACAGGCTGAATGCAAAATCCAGCAGTGGGGTTTACCTTC
TGCCTGGAGCAAAAACACCAGCAAGACTGGAAAGCCAGATCGGTACTTTACGTATGTCGCTGGTGAATATTACGCCTGATACAGATGGCACCACCCTGAC
GCTACGTATTCAGGGCGAATCTAATGACCCTTTACCCGCATTCAGCGGAACCGTTGAATATGGGCAAATTCAGGGAACAATAGACAACTTTCAGGAAATC
AATGTGCAGAATCAATTGATTAACGCACCTGCCAGCGTCCTCGCCCCCAGCAATGTTGATATTCCGTTACAGTTAAAGGGTATTTCTGTGGATCAGTTAG
GCTTTGTACGTATCCACGACATTCAACCTGTTATGCAGTAAACGTATTGCGGGGCTATATTGTGCGTCCCGCAACATCTTTCTCCGTCATTTTGTTACTC
CGCTTACATCACCTGGATTGATAGTAAAAGTTTGCAACAAGGGTGAAAGTCAGTACAATCCCCGCCCGAATGTGTGTAAACGTGAACGCAATCGATTACG
TAAATGATAGAACTGTGAAACGAAACATATTTTTGTGAGCAATGATTTTTATAATAGGCTCCTCTGTATACGAAATATTTAGAAACGCAATTTGCGCCTT
TTTCACTCCCGCAAGGGATTTTCAAACAGTGGCATACATATGAAAAAAACATTACTGGCAGCCGGTGCGGTACTGGCGCTCTCTTCGTCTTTTACTGTCA
ACGCAGCTGAAAACGACAAACCGCAGTATCTTTCCGACTGGTGGCACCAGAGCGTTAACGTTGTCGGAAGCTATCACACCCGTTTCGGACCGCAGATCCG
CAACGATACCTACCTTGAGTACGAAGCATTCGCTAAAAAAGACTGGTTCGACTTCTATGGTTATGCGGATGCGCCGGTATTCTTCGGCGGTAACTCCGAT
GCAAAAGGTATCTGGAACCACGGTTCTCCGCTGTTTATGGAAATCGAACCACGTTTCTCCATCGACAAGCTGACCAATACTGACCTTAGCTTTGGTCCGT
TCAAAGAGTGGTACTTCGCGAACAACTACATTTACGACATGGGTCGTAATAAAGATGGTCGCCAGAGCACCTGGTACATGGGTCTGGGTACCGATATCGA
TACTGGCCTGCCGATGAGCCTGTCCATGAACGTCTATGCGAAATACCAGTGGCAGAACTATGGCGCAGCGAATGAAAACGAGTGGGACGGTTACCGTTTC
AAAATTAAATACTTTGTGCCGATTACCGATCTGTGGGGCGGTCAGCTGAGCTACATCGGCTTCACCAACTTCGACTGGGGTTCCGATTTAGGGGATGACA
GCGGTAATGCAATCAACGGTATTAAGACCCGTACCAATAACTCCATCGCTTCCAGCCATATTCTGGCTCTGAACTACGATCACTGGCACTACTCTGTCGT
AGCTCGTTACTGGCACGACGGTGGTCAGTGGAACGACGATGCAGAACTGAACTTCGGCAACGGCAACTTCAACGTTCGCTCTACCGGCTGGGGTGGTTAC
CTGGTAGTAGGTTACAACTTCTAATTGTGAGAATGCCGGATTTCATATCCGGCATTTTTTATCACTTCTTCTTGTTCATCATCGCTTTCAGGTCAGCGAA
TGGGTTGTACTTCGCTTCACCGACATCTTTCTGCGCATCTTCCCCTGCGATAACGGTCGTACCATACTGATCTGCTTCGGTATATTTTGAATGCTCGTGA
TCGTGGCAATAAAGACACAATAACTCCCAGTTACTGCCGTCTTCCGGGTTATTGGTATGGTCGTGATCAATGTGGTGAACGGTAAGTTCACGCAGGTTGG
AATAAACAAACTCGCGAGAACAGCGACCGCAGACCCACGGATAGATTTTTAATGCTTTTTCGCGATAGCCGCTTTCTAACCGCGCATAGTTTTTTGGGAT
TATAGCCATGAAAAGTTACCTGGATGAAATGTAGGGTTACGCGCAGTTTCCCAAGATGCGGGGATTTTCGCAATCACCTTACATCAAAAAAATCCCGATC
TTCTGACCGGGATTTTCAACATCAGCTGAAACTTGATTAAGGCAGAATTGACGGCTGATCCGCCCCTTCTTTTTCCACTTTCTGCTGCAACATGTGTTCG
CGCTTCATACCCAGTTTCAGAGCCAGCGCAGATGCCACATAGATGGAAGATGCAGTACCGATGGAAACACCGATAAGCATGGTCAGCGAGAAGCCTTCCA
GTACCGGACCACCGAAGAGGTACAGCATCAGGATAACCATCAAGGTAGTACCGGATGTGATCAAGGTACGGTGCAGCGTCTGGGTCAAGGACACGTTAAA
GATTTCGTAAGGCGTACCGCGACGGATCTTGCGGAAGTTTTCACGAATACGGTCCGATACCACGATACTGTCGTTAAGCGAGTAACCGATAACCGACATC
AACGATGCCACAATGGTCAGGTCAATCTCGATATGGAATAACGACAAAATACCCAGCGTAATGATAACGTCGTGCGCCAGCGCAATAACAACCCCTGCCG
CCAGTCGCCACTCAAAGCGGAAACCAACGTACACGAGGATAGACAGCAGCGCTGCCATCAGCGCCATCGCACCGGTTTGCGCAAGGTCTGCCCCCACGCT
CGGACCGACGAACTCAATACGCTTCACTGCCGCATTCTGATTGGTGGATTCGTTAATCACCTTCAGAACCTGGCTGCCCAGCACCTGACCGCCGGTTTCG
CCTTCAGCAGGCGGCATACGGACCATGATGTCGTGGCTGCTACCAAAGTTTTGCAGCATCGGCTCTTCAAAACCGGCTTTTTGCAATGCATCACGCATTA
CGTCAATTTCAGCCGGTTTTTCGAGCGTAATTTCAATAACCGTACCACCGGTAAAATCCAGCCCCAGTTAAAGCCGCGCACGCCCATAATAACGATAGCG
GCGATTAACAGCAGACCAGAGATGCCGAAAGCCCAGTAGTCCCAGCGCATAAAGTCATAGACTTTACGGCCGTGGTTTAGTTGTTCAACAGTATATTCCT
GTGCCACATCGCACTCCTCAGATTGACAGCTTCTTGACGCGCTTGCCGCCATATAGCAGGTTTACGATGGCACGCGTACCGACAATCGCGGTAAACATCG
ACGTCGCCACACCGATACCGGTAGTAATCGCGAACCCTTTAATTGCCCCGGTACCCACTGCATACAGGATGATGACTTTAATCAGCGTGGTGATGTTCGC
ATCGAAGATGGAACTGAATGCGCCACGATAACCTTCATCAATTGCCTGTTGAACAGTACGTCCGTTGCTCAACTCTTCTTTAATACGTTCGTTGATCAGT
ACGTTCGCATCGACCGCTACCGCAAGGGTTAAGACGATACCCGCGATACCTGGCATACTCAGCGTTGCGCCTGGCAACAGCGACATAATACCGACAATCA
AGATCAAGTTGGCAATCAGAGCACTGGTCGCAATCAGACCAAACTTCTTATAGAAGATGATCATGAACAGAATAGAAACCAGCAGACCAGCAAGGCAAGC
CTCCAGCCCCTGCTCAATGTTCTGCATACCCAGGGTTGGGCCAATGGTACGTTCTTCAACAATCTGAATCGGCGCGATCAACGCACCGGCACGCAGCAGC
AGTGAAAGCTGACGCGCTTCGCTTGGGTTATTGATGCCAGTAATACGGAAGCTGTTACCCAGACGAGACTGGATGTTGGCGATATTAATCACCTCTTCCT
GTTTCACCAGAACCGCACGACCGTTTGCATCTTTCTTACCGCTGTCTTTGTACTCCACAAACAGGGTTGCCATCGGTTTGCCGATGTTGTCCTTGGTGAA
GTTAGACATGATGTTACCACCCGCGCTATCGAGCGAGATGTTAACCTGCGGCTGGTTGTATTCGTCCTGGCTGGAAGTGGAGTCGGTGATATGGTCACCG
GTCAGAATTACGCGTTTGTACAGCACAACCGGCTGACTTTCGCGGGTCTGTTTCACTTCAGAGTCGCCCGGTACGCGACCGGATGCCGCAGCGGCCTGAT
CAACGTTGGTGTTTACCAGACGGAATTCCAGCGTTGCCGTCGCACCCAGAATCTCTTTCGCACGCGCAGTGTCCTGAATACCTGGCAGTTCAACAACGAT
ACGGTCAGCACCCTGACGCTGAACCACCGGCTCCGCCACGCCAAGTTGGTTTACACGGTTACGCAGGATATTGATGTTCTGCTGCACCGCATATTCACGC
GCTTCACTCAGACGAGCATCGCTCATTACCGCACGCAGCTGGTTGCTGCCCTGGCTGCTAATCACCAGGTCCGGATGGCGCTTGCTCAGATACGCAATGG
CTTCATCACGAGCTTTAGCATCGCGGAAAGTGATGCTCAGGCCGTAGTTGTTTTCTTTACGAACGGTGGTATACGGGATGCCCTTTTCACGCAGGTCGCT
GCGCAGGCTATCGATATTTTGTTCCTGGAGTTTGCCAAGCGCGGTGTCCATATCCACTTCCATCAGGAAGTGAACGCCGCCACGCAGGTCAAGGCCGAGC
TTCATCGGCTCAGCATGAATAGCTGCCAGCCAGCGCGGCGTTGCCGGGGCAAGGTTAAGCGCCACGACGTATTTGTCACCCATAACGCCCATTAATGCTT
CACGAGCGCGCAGCTGGGTGTCAGTGGAGTCGAAGCGCGCAAGAATAGCGCCCTCTTCCAGTGCCACAGACTTAGCAGTTATTTTTTCTTCTTGTAACGT
TTTCTGGACCTGGATCAGCGTTTGCTCACTGGCGGCGACTCCGCGCGCACCAGTGATCTGAACAGCCGGATCCTCACCAAACAGGTTGGGAAGCGCATAC
AGCAGACCGATGACAATCACCACGATCAGCATGACGTACTTCCACAAAGGATAACGGTTTAACACGGCAATTCCCTTAGGGAAAAATTTTAATTACAGCG
CCTTCATGGTGCCTTTCGGCAGAACGGCAGCTACGAAGTCACGTTTAATAACTACTTCAGTGGTGTCATTCAGTGCGATAGCAATGTAGCCGTTTTCCGC
TACTTTGGTTACGCGACCGACCAGGCCACCGTTCGTCAGCACTTCATCACCTTTAGCGATGGAGTCCATCAGCTTTGTGTTCTTTGGTGCGCTTCTGCTG
TGGACGCAGGATCATGAAATAGAAAATCAGACCGAATACCACCAGCATCAAAATCAAAGACATCGGGCTACCTTGCGCCGGTGCACCCGTTGCCGCTACC
GCATCAGAAATAAAAAAGCTCATTAAATTTCCCTCATTATTAATATTAATCAACGTTCAAAGGTGGTACTTCTCGCCCCTGACGCTGGTAAAAATCAGTT
ACGAAGCTCTCTAATTTACCCTCTTCAATAGCCTTGCGTAAACCCGCCATCAAACGCTGGTAGTAACGAAGGTTATGAATGGTGTTGAGTCGCGCGCCTA
ATATTTCGTTGCAACGGTCGAGATGATGCAAGTAAGCGCGTGAATAATTGCGACAGGTGTAGCAATCACACTCAGGATCGAGTGGGCCAGTATCGCTCTT
ATACTTCGCATTGCGGATTTTCACCACGCCATCGGTCACGAACAAATGACCATTTCGGGCGTTGCGGGTTGGCATTACGCAGTCAAACATATCGATACCG
CGACGTACGCCCTCAACCAGGTCTTCTGGTTTACCAACGCCCATCAGGTAACGCGGTTTGTCTGCCGGAATTTGCGGGCATACATGCTCCAGAATACGGT
GCATATCTGCTTTCGGCTCACCCACAGCCAGACCGCCGACAGCGTAGCCATCAAAACCGATATCTACCAGACCTTTAACAGAAATATCACGTAAATCTTC
GTAAACACTGCCCTGAATGATACCAAACAGCGCATTTTTGTTTCCGAGACTGTCAAAACGCTCACGGCTACGCTTCGCCCAACGCAGAGACATCTCCATG
GAGCGTTTTGCGTAATCCCAGTCAGCAGGATACGGCGTACACTCATCAAAGATCATGACGATATCCGAACCAAGATCGTACTGAATCTCCATCGACTTTT
CCGGGTCGAGGAAAATCGGGTCGCCGTTGATCGGGTTACGGAAGTGAACGCCCTGTTCGGTGATTTTACGAATATCACCAAGGCTGAAGACCTGGAAGCC
GCCGGAGTCGGTAAGGATTGGTCCTTTCCACTGCATAAAATCGTGCAGATCGCCGTGCAGTTTCATGATTTCCTGGCCCGGGCGCAGCCACAGGTGGAAG
GTGTTGCCGAGGATAATTTGCGCGCCAGTGGCTTCAACTTCTTCCGGCGTCATCCCTTTTACGGTGCCGTAAGTGCCAACAGGCATAAAACAAGGCGTTT
CCACTACGCCACGATCAAATACCAGGCGGCCACGGCGTGCGCGACCGTCGGTGGTGTCCAGTTCAAATTTCATTTTTTCTCCACTACGTCAGAAAAACAG
TCCAACGTTTAAACCAGCGCCGCGGAATTACTCCCCAACGCGCTCATTAATTGCCTGCGGATTGTACGTGATAAACATCGCATCACCGTAACTAAAAAAG
CGATATTTCTCTTCTACCGCCGCTTTATAGGCATTCATGGTGTGTTGATAACCAGCAAATGCCGAAACCAGCATAATCAGCGTCGATTCCGGAAGGTGGA
AGTTCGTCACCAGCGCATCGACCACTTTGTACTGGAAACCCGGATAGATAAAGATTTGGGTATCGTCAAAGAACGGTTCAATGAGATCGTTTTTCGCTGC
CTGAGCCGCACTTTCCAGCGAACGTACTGAGGTGGTACCAACCGCAATCACCCGGTTACCGCGCGCTTTCGCCGCCAGTACCGCGTCTACCACATCCTGC
GGCACTTCAGCGTATTCCGAGTGCATGATGTGATCTTCAATGGTGTCGACGCGCACCGGCTGGAAGGTGCCCGCACCAACGTGCAACGTCACAAACGCCA
TCTCCACGCCTTTGGCGCGTAATTTTTCCAGCAAAGGTTCGTCAAAGTGCAGTCCGGCGGTCGGTGCTGCTACCGCGCCGGGTTTTTCGCTATAAACCGT
TTGATAAAGTTCGCGGTCTGCATCTTCGTCCGGACGGTCGATGTACGGCGGCAGCGGCATATGGCCGATGCTGTTGAGAATATCCAGCACCGAACGTTGA
TCATTAAATTCGACTTCAAACAGTGCGCCGTGGCGCGCGGTCATTGTTGCGTTAATACGTTCGTCATCGCCCAGCAGCAGTTCTGCGCCAGGTTTTGGCG
CTTTCGAGGCGCGAATATGCGCAAGAATGCGTTTGTCGTCGAGCATCCGCTCAACCAGCACTTCAATCTTGCCGCCGCTGGCTTTACGCCCAAACAGACG
CGCCGGGATCACGCGGGTATTATTAAAAACCAGAAGATCGCCGGGGTTGAGCTTATCGAGTAAATCGGTGAAAGTACCGTGCGTCAGCGCGCCCGTCGGC
CCGTCCAGCGACAGTAAACGACAGCTACTGCGTTCAGGCATGGGATAGTGGGCAATCAGGGATTCGGGCAATTCAAAAGAGAAATCGGTAACGCGCATGA
CACTGACTCAGACTAAAATAAGAGGCGGGTAGTCTAGTGCCGGGGCGCTCTCCCTGCAACCTTTACCCTCCTTGATGGATGACATAATCTATACACAAAA
TCATTCAAGATGCATCGAGATGGCAACTGAATGAGTCCCCAGGAGCTTACATTAAGTAAGTGACTGGGGTGAGTGAAGGCAGCCAACGAAGAGGCAGTTT
GAAGGATGAAGTGTATATGAATTTTAGCTCACCTGCATTTAGCCCATCTCGCGGAAAGCTCGCTTTCCGGCAATTTACTGGCTGATTTCGTACGCGGAAA
TCCTGAAGAAAGTTTTCCGCCCGACGTCGTGGCTGGTATTCATATGCATCGGCGAATCGACGTATTAACCGACAATCTGCCAGAAGTCCGCGAAGCGCGG
GAGTGGTTTCGTAATGAAACGCGCCGTGTCGCGCCTATTACGCTGGATGTGATGTGGGATCACTTTCTGTCCCGCCACTGGTCGCAGCTGTCGCCCGATT
TTCCGCTACAGGAATTTACCTGTTATGCCCGGGAGCAAGTGATGACTATTCTTCCAGACTCACCGCCACGCTTTATCAATCTGAACAACTACTTATGGTC
AGAGCAGTGGTTGGTGCGCTATCGCGATATGGATTTCATCCAGAGCGTGTTAAACGGCATGGCAAGCCGTCGCCCACGTCTGGATGCCCTGCGTGACTCC
TGGTACGATTTAGACGCCCATTACGATGCTCTCGAAACCCGCTTCTGGCAGTTTTATCCGCGGATGATGGAGCAGGCGTCACGCAAGGCGTTATAAGACG
TTAATTCATCCACACCGTAGCCGAAATGGCAGGCAAAGCCAGAATCCCGTCCGTCAGTTGCCCGTGACCTTCTTTGCGTTGCCATTGCGCGACATTAAGC
AACGGTGACGCGGGTAGCACCACTTCACAGGCTTCGCCACGGTTGATTGCCACCAGTACACGCTGCTGATTCAGCACGCGGACAAATACCACCACGTTAT
CTTCCGCATACAGCACCTGACAGCCGCCACGACGCAACGCCTGACTTTTCTTACGCAGCGCAATCATTCGCTGGTACAGCGCGAATAACGCCGAATCCTG
CTTTTCCACCTGCCAGGGAACGGCTTACGGCAAAACGGATCGTTTTTGCCATCCAGTCCCACTTCATCACCGTAATAAATGCACGGTACACCAGGCCAGG
TGAACAGCCAGACCACCGCCAGGGCAGGCGCGCAACATCCCGACCGAGCAGCGTTTTAAATCGCGCAGTATCGTGGCTGTCGAGCTGATTAAACATACGT
AATTGTTGTTGATGAGAAAGCCCTGCGCGGTAATTATCCATCCAGGCCATACAGGTTTGGGCGTCAATTTGCTGCGGATCGTAAGAGATATCGGTGTTGG
CAAGAAATCCCCACAACGGGAATGTGAAGCCGCGATAGTTCATGGCGGCATCTTCCACATCGGCCTGTAACCATTGCCGTGCATCGCCAAAATGTTCGCC
GACAATATACGCATCCGGCTGGGTTTCTTTCGCCGCTTCGGTGATCCCGGCAACGTGCTGCAAATTATTGCGCGCCCCACCCGCTTCCCCCAGCATATGC
ACCACATCCAGCCGCCAGCCATCCATATTCCACGGCGCTTTCAGCCAGTGGCGGACAATACTGTCTTCCCCGCGATAAATTTCATTCACCAGACTTTCCG
ACTGATAATCCAGCTTCGGCAAGCTGGCATAGCCCAGACAGTCGAGCGCCGTGCCATCATCACTAAACGAGTACCAGTCACGCCAGGGTGATTCGGGGTT
GTGACAAGCTCCCCGTGCCACGATTGTGCCTGTCAAACCAGGCATGGGAATCGCCACTGTGGTTAAACACGCCGTCCAGCACCAGTCGTATTCCCAGCTG
CTGCGTATTGTGTCGCAAACGCAGCAACGCCCCATCACCGCCAAACTGCGGATCGACATGGCGATAATCCTCGGTATCGTATTTATGCACGCTGGGAGCT
TTAAACACCGGATTGAGATACAGCGCCGTCACGCCAAGTTTTTTCAGATACGGCAGTTTTTCACTTATCCCGTCCAGATCGCCGCCATAGAACGTTGATC
CGCCAGCCTGCGCCGTGACCGGTTCATCCCAGTCACGCAATATGATCTCTTGTCCGGCTGCGTGATGGTAATAGACATGATCCTGTTCAGCTTCACGAGG
AAGATTACGGGCGAAACGATCAGGGAAGATCTGATAAAAAATCTGATCCGCAGCCCATTGTGGGCCGATATCCGGTACATCAATGGCAAACTGCTCCAGT
CGTGCTGGCGGCATTCGGCTGAAGCCCTGCGGTGTAAACCAACGCTGGCGATCGTGCCACAGTAATTTGAAACTATAACGCCGCCGAGGTTGCCCGCTGG
AGAGATCGATCGCCGCCCGCCATGCGGTGATGCCAGGCTGCGGCTGACTGCGCTGCTTATGCATCGCTACTGACGTTTCTTCGTTGTCGTGTTCTGTACG
CAGCATAATGCGATGCGGTGGGTCTTCGCCCGTCAGCCACAGCGTAATGAGCAGTTGATCTTTGCTTTGTTTAACAAATGGGGGCACCGGCAGGTGCCAT
GCATTTAACATCATAATTCCCCTGTGATGAAAATCTGATCACCTTGCCATAGCCTAATGCAGGATCACTCATCATCTGAAGGATATTTGGGGAAGGAGGA
CGGGGGCGGATAACTTTCGGAATAGCCGGATCAGGATTTCCTCCTGAACCGGCTTACAGAACGCAAGGATTACTGGTTTTCAGCCAGCTGACGATCGTGG
CGGCGCTTAAACATCCAGCCAATCAACAGCACAACAATCCACGCGAAACCAACATACAGCGAGATACGCGTATCAGGGTGATAACCAATCAACCCGATAA
TAAAGAGCAGGAAAATCAAACCGCCGATGGTCGTTGCTACCCCACCCGGCACTTTAAATTTCAGCGCCTTAACTTCTTCTGGCGGCAAACGGCGACGGAA
GGCGATTTGCGACAGCAGGATCATAATCCACACCCACACCGTGGCGAAGGTTGCCAGCGAAGCGATCACCAGGAAGACGTTTTCCGGCATGATGTAGTTC
AGATACACCGCAAACAGCAGCGCGGTAGTCATCACCAGCACCGTAACCCACGGAATACCGCGACGCGAGGTTTTGCTGAAAATTTTTGGCGCGCTGCCCT
GCTCTGCCATACCGTGGAGCATACGGCCTACACCAAATACGTCACTGTTAATTGCCGACAGCGAAGCGGTCAGCACAACAAAGTTAAGAATGCTGGCGGC
AAAGGTAATGCCCATATGCTGGAACGTCAGCACAAACGGGCTACCGGCAGTGCCAACCTGATTCCACGGGTAGATAGACATAATGACGAACAGCGTACCG
ACGTAGAACACCAGAATACGCATCGGCACGGAGTTAATCGCACGCGGAATCGATTTCTCAGGATCTTTCGCTTCACCGGCGGTAATCCCGATAATTTCGA
TCCCACCGTAAGCAAACATCACCATTTGCAACGACATCACCATACCAAGCCAGCCGTTACTGAAGAAGCCGCCGTTGCTCCACAGGTTATGAATACCGGT
CGGTTGCCCGCCGTTGCCAATCCCCCAGATGATGATGCCGAAACCGGCGACAATCATGATGATGATAGTGGCGACTTTAAAGAACGAGAACCAGAACTCC
AGCTCACCGAATACCTTCACGCTCATCAGGTTTACGGCGCAAATGATCAGCACCACACTCAGTACCCAAATCCAGTGCGGCACCGTCGGGAACCAGACAC
CCATATAGATACCAAAAGCGGTCACATCGGCGATGGCGACAATAAGGATTTCAAAGCAGTAGGTCCAGCCGGTAATGTAACCTGCCAGCGGGCCGAGGTT
TTCCTGCGCATAACGCGAGAAAGAGCTGGCTGCCGGGTTATGTACCGACATTTCCCCCAGCGCACGCATAATGATATACGCCGCGATACCACCGATAATA
TAGGCCAACAACACGCTTGGACCGGCCATTTTGATGGCATCTGCCGAACCGTAAAACAGCCCGGTGCCAATTGCTGAACCCAGTGCCATAAAGCGTATGT
GTCGGGTACTTAGCCCACGCTTTAGCTTGTTCTTACTTTCCATCAATTCCTAACCCATCAACACAATAAAAAACCACGGGGCATCGCAGCCCCGTGGTTA
AAACAAATGTTCAGTGATTTAGTGAGCGCTGGAGGTCACCTGACGACCTGCCGCGCGATCCCAGATAATGGCCAGAACCACCATCACCACTGTTGGCATT
AACCACGCCAGACCTTGTTCGGCCAGCGGTAAACGCTGCGCCCAGGACGGTAAGATATCGCTGAATGCAGATGCCTTGATCCCGTCGAGAATACCAAAAA
GCAGGCTGATAAACATCGGCGGAGCAATCACGCGGGACGAATTATGCCACCATGAGCGTGTAAAACTTAATACAACCAGTGCGATACACGGCGGATAAAT
GGCGGTCAGCACCGGTACAGAGATCTGAATCAGCTGGCTCAAGCCGAGGTTAGACACCACCATCGAGAAGCCGCCGAGGATAAACACCAGCGTACGATAA
GAGAGCGGTACGTACTGGGCGAAGAATTCTGCACAAGCACAGGTCAGGCCAACCGCCGTGACCAGGCAGGCGATGAAGATTAACGCCGCCAGCAGGAAGC
TACCGCCGCCGCCAAAGGTATGCTGAACGTAAGCATGCAGGATCGCCGCACCGTTTGCAGACTGATCGACCAGCGACGCGCTGTCTGAACCCAGACGGAA
CAGCGCCAGGTACAGCAGAGTCAGACCAACACCCGCCATCAGGCCAGCCCAGACGGTATAACGGGTCAGCAGACGCGCTTCGGTAACGCCACGAGAACGC
GCCGCGTTAACAATAACGATACCAAACACCATTGCGCCCAGCGTATCCATGGTCAGATAGCCGTTGACGAAGCCGTTAGAAAACGCAGCGTTTTGATAAG
CCTCAGTCGCCGTGCTGATAGAACCCGCCGGCCAGATAATTGCGGCAACAGACAGGATGACCAGTGCGATAATTTTCAGCGGCGCAAGGAAGTTGCCCAC
GGTATCCAGCAGCTTGCCCGGATAGAGCGAAACCAGAATAACGATAGCGAAATAGACCAGGCTGTAAATAAACAGCGGCAGCGCGGAATCACCCGTCAGC
GGCGCAATGCCCACTTCAAAAGAAACGGTAGCTGTACGCGGCGTAGCGAAAAGCGGCCCCACCGCCAGGTAACAAACTGTTGCCAGCAGTACGCCAGCGA
CTTTACCAATTGGCGTGCTGAGACTGTCAACACCGCCGCCAACTTTTGCCAGCGCCACTACCGTTAATACCGGTAGGCCAACGGCAGTAATGAGGAAGCC
GAATGCCGCAGTCCAGACGTGTTCGCCTGCCTGCAAGCCGACCATTGGAGGGAAAATAATGTTACCTGCGCCGACGAACAACGCAAATGTCATAAAGCCC
AGAGCGATGATATCGCGCGATCTTAATTGATGGGTCATAAATCATACTGCCTGTGGATGTGGTGTTGTAACGTTAAATTTTTGTGCCAATCCCTGGGGAT
GATACAGCGGTATATTTAAACAATTTTAGCGGGAAATACTCCCAACCAGGCGCGGCGAAGAATAGTTTTTCGATTTACCGCGTAAATGCAGTCAGTATGA
CAGCACCTAAAGCGCAATTTAAACGCTTATAACGTTTTAAAGCAAGAAGGGATCTAAAAACCAGAGGTATATAGCGATAAGAAATCACCAACCAGTATAA
AACACTATTTCAATGAAAAAGACATGGCTAATCATGCGAACAAAAAATCACCAACCATTGTAAAATCTAACGCCCGTATTTCGACTGCAAAGAAAATAAG
CCAGCATCGGCTGGCTTATGGCAATAAAAGATGACAAAGGCGAATTAATCGCTGTTTTTGGCAATTAAACGTTCCGGGATAACAAAACTGAAACGTGTAC
CTTTTCCTACTGTACTCTCAATATTCAGGCGACTTTCGTGATGATTCACCGCATGTTTCACGATCGCTAACCCTAATCCGCTACCACCGGTTTGCCGGGA
ACGCGCTTTATCAACGCGATAAAAACGCTCGGTCAGGCGCGGAATATGCTCCGGTGCAATGCCCGGTCCGTTATCTTCAACACTAAATTCGGCACCGTGC
GGCACTCGCTGCCAGCGTACGGTGATATGCGTGCCTTCCGGCGTATGATTCACGGCGTTATAGACCAGGTTCGAAATCGCACTGCGTAGCTGATCTTCGT
TGCCTGACACCTTGAGGCCGTTATCTATCTCAAAGGTAACTGTCTGTTTTTTCTGACTCAGAGTCTGAGCCTCGCGCTCAACGACGCGCAGCATCATCGG
CACATCAACCTTTTCATTGAGCAAATGCGTCGGTGCGGCTTCTATTTTCGACAGCGTCAGCAATTGCTTCACCAACCCTTCCATCCGCTGGGTCTGCTCG
CGCATGGTGTGCAACGCTTTTTCACGTACCGCGCCTTCCAGCGGTTGCTCATCCATCATCTCCAGGTAACCCTGTAACACGGTCAATGGCGTACGTAACT
CATGGCTCACATTGGCAAAAAAGTTACGCCGCGCCCCTTCCAGTTGATGCATTTGCGTGACATCACGCGCCACCATCAGCAACTGTTTGTGGGTATAAGG
CATGACGCGAATCTCCAGATGCCGCCCGGTGTTGAGCACCAGATTGAGCGGGCGAGAGAAATCACGCGTTTTCAGATATTGCGTAAACTCCGGGTAACGC
AGCAAGTTAAGGATGTTCTGCCCGTTATCTTCCGGCCAGCGCAAGCCAAGAATCTGTTGCGCCAGACCGTTGCACCAGAAAATACCGCCCTCTTCCGTGG
TCAGCACCACCGCGTCGGGCAGCGACTCCGCGCCGCTACGAAAGCGTTTAATCAGATTGCCCAGTTCACGACGGCGTTTTTTATTTCGCAGCTGCATCTG
GTGTAAGCCGTATAGTAGCGGTTCCCAGCTACCACGCCCCGGTGGCGGGGTCATACTGCGATCCACCCACAGCCACCATGAAAGGCGCAACAAATTCCAG
AAATGCCAGATAAGCAGTCCCGTTACCGATGCCAGCAAAAACCAGGGCAGGTAACCAAAAATGCACCCAGGATGAAAGCCGGGAGGCAGCAAAGTAGCAG
CTCCAGCACCAGCCTTTTCCACGACAGCCGTTCCAGCACGTAAGATACTCCAGTTAAGAAATCATAAGCCCTGCTCTGCGTCCGATGAGCAAGGCGTTAA
AAGCGGGTTGAAAAACGATATCCTGTACCGCGCACGGTCTGCACCATGCGGTCATGCCCGCCGGGCTCCAGTGCTTTACGCAGGCGACGAATGTGGACAT
CGACCGTGCGGTCTTCCACATACACGTTAGTTCCCCAGACGTGGTTTAACAGCTGCTCGCGGCTGTACACGCGCTCAGGATGCGTCATAAAAAAGTGCAG
CAGTTTAAATTCAGTTGGCCCCATCTCCAGCGGTTCTTCGCCCGCCATCACCCGGTGAGATGTCGGGTCCAGACTTAGCCCCTGCATCTCGATCACCTCT
TCCACCGCCATTGGCGAAATACGGCGCATTACCGCTTTGATTCGCGCCACCAGCTCCTTCGGCGAAAACGGCTTGGTGATATAGTCATCCGCGCCGGTTT
CAAGGCCGCGCACGCGATCTTCTTCTTCCCCTCTGGCGGTCAACATCACCACTGGAATATCCCGGGTCATCGACTCGCGCTTGAGGTGTTTGATGAACTG
GATACCGGAGCCGCCAGGTAACATCCAGTCAAGGAGAATTAAATCCGGCCAGGGTTCATTCAGTTGATTCACAGCACTGTCATAATCTTCTGCTTCGACC
GGCTGAAAGCCATTTTGTTCGAGCACGAAGCAGACCATTTCGCGAATTGGTGCTTCATCTTCTACGACCAGAATACGTCTCGCCATGATTTGCCCTGTTG
TAATAAATAGGTTGCGATCATTAATGCGACGTCATTATGCGTCAGATTTATGACAGATTTATGAAAAGCTCGTCGCACATATCTTCAGGTTATTGATTTC
CGTGGCGCAGAAAAAAGCAAATGGCACATCTGTTTGGGTATAATCGCGCCCATGCTTTTTCGCCAGGGAACCGTTATGCGCATCCTTCACACCTCAGACT
GGCATCTCGGCCAGAACTTCTACAGTAAAAGCCGCGAAGCCGAACATCAGGCTTTTCTTGACTGGCTGCTGGAGACAGCACAAGCCCATCAGGTGGATGC
GATTATTGTTGCCGGTGATGTTTTCGATACCGGCTCGCCGCCCAGTTACGCCCGCACGTTATACAACCGTTTTGTTGTCAATTTACAGCAAACTGGCTGT
CATCTGGTGGTACTGGCAGGAAACCATGACTCGGTCGCCACGCTGAATGAATCGCGCGATATCATGGCGTTCCTCAATACAACCGTGGTCGCCAGCGCCG
GACATGCGCCGCAAATCTTGCCTCGTCGCGACGGGACACCAGGCGCAGTACTGTGCCCCATTCCGTTTTTACGCCCACGTGACATTATTACCAGCCAGGC
GGGGCTTAACGGTATTGAAAAACAGCAGCATTTGCTGGCGGCTATTACTGATTATTATCAACAACACTATGCCGATGCCTGCAAACTGCGCGGCGATCAG
CCTCTGCCCATCATCGCCACTGGACATTTAACGACCGTGGGTGCCAGTAAAAGTGACGCCGTGCGTGACATTTATATTGGCACGCTGGACGCGTTTCCGG
CACAAAACTTTCCACCAGCCGACTACATCGCGCTCGGGCATATTCACCGTGCACAGATTATTGGCGGCATGGAACATGTTCGATATTGCGGTTCCCCCAT
TCCACTGAGTTTTGATGAATGCGGTAAGAGTAAATATGTCCATCTGGTGACATTTTCAAACGGCAAATTAGAGAGCGTGGAAAACCTGAACGTACCGGTA
ACGCAACCCATGGCGGTGCTGAAAGGCGATCTGGCGTCGATTACCGAACAGCTGGAACAGTGGCGCGATGTATCACAGGAGCCACCTGTCTGGCTGGATA
TCGAAATCACTACTGATGAGTATCTGCATGATATTCAGCGCAAAATCCAGGCATTAACCGAATCATTGCCTGTCGAAGTATTGCTGGTACGCCGGAGTCG
TGAACAGCGCGAGCGTGTGTTAGCCAGCCAACAGCGTGAAACCCTCAGCGAACTCAGCGTCGAAGAGGTGTTCAATCGCCGTCTGGCACTGGAAGAACTG
GAGGAATCGCAGCAGCAACGTCTGCAGCATCTTTTCGCCACGACGTTGCATAGCCTCGCCGGAGAACACGAAGCATGAAAATTCTCAGCCTGCGCCTGAA
AAACCTGAACTCATTAAAAGGCGAATGGAAGATTGATTTCACCCGCGAGCCGTTCGCCAGCAACGGGCTGTTTGCCATTACCGGCCCAACCGGTGCGGGG
AAAACCACCCTGCTGGACGCCATTTGTCTGGCGCTGTATCACGAAACTCCGCGCCTTTCTAACGTTTCACAATCGCAAAATGATCTCATGACCCGCGATA
CCGCCGAATGTCTGGCGGAGGTGGAGTTTGAAGTCAAAGGTGAAGCGTATCGTGCGTTCTGGAGCCAGAATCGGGCGCGTAACCAGCCCGACGGTAATTT
GCAGGTGCCACGCGTTGAGCTGGCGCGCTGTGCCGATGGCAAAATTCTCGCCGACAAAGTGAAAGATAAGCTGGAACTGACGGCGACGTTAACCGGACTG
GATTACGGGCGCTTCACCCGTTCGATGCTGCTTTCGCAGGGGCAATTTGCTGCCTTCCTGAATGCCAAACCCAAAGAACGCGCAGAATTGCTCGAGGAGT
TAACCGGCACTGAAATCTACGGGCAAATCTCGGCGATGGTTTTTGAGCAGCACAAATCGGCCCGCACAGAGCTGGAGAAGCTGCAAGCGCAGGCCAGCGG
CGTCGCGTTGCTCACGCCGGAACAAGTGCAATCGCTGACAGCGAGTTTGCAGGTACTTACTGACGAAGAAAAACAGTTAATTACCGCGCAGCAGCAAGAA
CAACAATCGCTAAACTGGTTAACGCGTCTGGACGAATTGCAGCAAGAAGCCAGCCGCCGTCAACAGGCCTTGCAACAGGCATTAGCCGAAGAAGAAAAAG
CGCAACCTCAACTGGCGGCGCTCAGTCTGGCACAACCGGCACGAAATCTTCGTCCGCACTGGGAACGCATCGCAGAACACAGCACGGCGCTGGCGCATAC
TCGCCAGCAGATTGAAGAAGTAAATACTCGCTTACAGAGCACAATGGCGCTTCGTACGAGCATTCGCCACCACGCGGCGAAGCAGTCAGCAGAATTACAG
CAGCAGCAACAAAGCCTGAATGCCTGGTTACAGGAACACGACCGCTTCCGTCAGTGGAACAACGAACTGGCGGGTTGGCGTGCACAGTTCTCCCAACAAA
CCAGCGATCGCGAGCATCTGCGGCAATGGCAGCAACAGTTAACTCATGCTGAGCAAAAACTTAATGCGCTTGCGGCGATCACGTTGACGTTAACCGCCGA
TGAAGTTGCTAGCGCCCTGGCGCAACATGCTGAGCAACGCCCACTGCGTCAGCGCCTGGTCGCACTGCATGGGCAGATTGTTCCCCAACAAAAACGTCTG
GCGCAGTTACAGGTCGCTATCCAGAATGTCACTCTGGAACAGACGCAACGTAATGCCGCACTTAACGAAATGCGCCATCGTTATAAAGAAAAACGCAACA
ACTTGCCGATGTGAAAACCATTTGCGAGCAGGAAGCGCGCATTAAAACGCTGGAAGCCCAGCGCGCACAGTTACAGGCGGGTCAGCCTTGTCCACTTTGT
GGTTCCAGCAGCCACCCGGCGGTCGAGGCGTATCAGGCGCTGGAACCGGGCGTTAATCAGGCCCGGCTATTAACGCTGGAAAAAGAAGTGAAAAAGCTCG
GCGAAGAAGGTGCGGCGCTACGTGGGCAACTGGATGCATTAACGAAGCAGCTTCAGCGCGATGAAAACGAAGCGCAAAGCCTCCGACAAGATGAGCAAGC
ACTTACTCAACAATGGCAAGCCGTCACGGCCAGCCTCAATATCACCCTGCAGCCACAGGACGATATTCAACCGTGGCTAGATGCACAAGATGAGCACGAA
CGCCAGCTGCGGTTACTCAGCCAACGGCATGAATTACAAGGGCAGATTGCCGCGCATAACCAGCAAATTATCCAGTATCAACAGCAAATTGAACAACGCC
AGCAGCAACTCTTAACGGCATTGGCGGGTTATGCACTGACATTGCCACAGGAAGATGAAGAAGAGAGCTGGTTGGCGACGCGTCAGCAAGAAGCGCAGAG
CTGGCAGCAACGCCAGAACGAATTAACCGCGCTGCAAAACCGTATGCAGCAGCTGACGCCGATTCTGGAAACGTTGCCGCAAAGTGATGAACTCCCGCAC
AGCGAAGAAACTGTGGCGCTGGAAAACTGGCGGCAGGTTCATGAACAATGTCTCGCATTACACAGCCAGCAGCAGACGTTACAGCAACAGGATGTTCTGG
CGGCGCAAAGTCTGCAAAAAGCCCAGGCGCAGTTTGACACCGCGCTACAGGCGAGCGTCTTTGACGATCAGCAGGCGTTCCTTGCGGCGCTCATGGATGA
ACAAACACTAACGCAGCTGGAACAGCTCAAGCAGAATCTGGAAAACCAGCGCCGTCAGGCGCAAACGCTGGTCACTCAGACAGCAGAAACGCTGACACAG
CATCAGCAACACCGACCTGGCGGGTTATCTCTCACTGTGACGGTGGAGCAGATTCAGCAAGAGTTAGCGCAAACTCACCAAAAGTTGCGTGAAAACACCA
CGAGTCAAGGCGAGATTCGCCAGCAGCTGAAGCAGGATGCAGATAACCGTCAGCAACAACAAACCTTAATGCAGCAAATTGCTCAAATGACGCAGCAGGT
TGAGGACTGGGGATATCTGAATTCGCTAATAGGTTCCAAAGAGGGCGATAAATTCCGCAAGTTTGCCCAAGGGCTGACGCTGGATAATTTAGTCCATCTC
GCTAATCAGCAACTCACCCGGCTACACGGGCGCTATCTGTTACAGCGCAAAGCCAGCGAAGCGCTGGAAGTTGAGGTTGTTGATACCTGGCAGGCTGATG
CGGTACGCGATACCCGTACCCTTTCCGGCGGCGAAAGTTTCCTCGTCAGTCTGGCGCTGGCACTGGCGCTTTCAGATCTGGTCAGCCATAAAACGCGTAT
TGACTCGCTGTTCCTTGATGAAGGTTTTGGCACACTGGATAGCGAAACGCTGGATACCGCCCTTGATGCGCTGGATGCCCTGAATGCCAGTGGCAAAACC
ATCGGTGTGATTAGCCACGTCGAAGCGATGAAAGAGCGTATTCCGGTGCAGATCAAAGTGAAGAAGATCAATGGACTGGGCTACAGCAAACTGGAAAGTG
CGTTTGCAGTGAAATAACTATTCAGCAGGATAATGAATACAGAGGGGCGAATTATCTCTTGGCCTCGCTGGTCGTTATCCTGCAAGCTATCACTTTATTG
GCTACGGTGATTGGTAGCCGTTCTGGTGGTTGTGATGGTGGTATGAAAAAGTTATTTTATCTTTGGCTCTGGGCACGTTTGGTTTGGGGATGGCCGAATT
TGGCATTATGGGCGTGCTCACGGAGCTGGCGCATAACGTAGGAATTTCGATTCCTGCCGCCGGGCATATGATCTCGTATTATGCGCTGGGGGTGGTGGTC
GGTGCGCCTATAATCGCGCTTTTTTCCAGTCGCTACTCACTCAAACATATCTTGTTGTTTCTGGTGGCGTTGTGCGTCATTGGCAACGCCATGTTCACGC
TCTCTTCGTCTTACCTGATGCTCGCCATTGGTCGGCTGGTTTCCGGCTTTCCGCATGGTGCATTTTTTGGCGTCGGCGCGATCGTGTTATCAAAAATTAT
CAAACCCGGCAAAGTCACCGCCGCCGTGGCAGGGATGGTTTCCGGGATGACAGTCGCCAATTTGCTGGGCATTCCACTGGGAACGTATTTAAGTCAGGAA
TTTAGCTGGCGCTACACCTTTTTGTTGATCGCTGTTTTTAATATTGCGGTGATGGCATCGGTCTATTTTTGGGTGCCAGATATTCGCGACGAGGCGAAAG
GAAAACTACGCGAACAATTTCACTTTTTACGCAGCCCTGCCCCGTGGTTAATTTTCGCCGCTACGATGTTTGGCAACGCAGGTGTGTTTGCCTGGTTCAG
CTACGTAAAGCCATACATGATGTTTATTTCCGGTTTTTCGGAAACGGCGATGACCTTTATTATGATGTTAGTTGGGCTAGGGATGGTGCTGGGGAATATG
CTAAGTGGCAGGATTTCAAGACGTTATTCACCACTGCGCATTGCAGCAGTGACTGACTTTATCATTGTACTGGCACTGCTGATGCTCTTTTTCTTCGGCG
GTATGAAAACAACGTCGCTTATTTTTGCTTTTATTTGTTGCGCGGGATTATTTGCCCTTTCAGCACCTCTACAAATATTATTACTGCAAAATGCCAAAGG
CGGAGAGTTATTAGGTGCCGCAGGTGGGCAAATAGCGTTTAACCTCGGTAGCGCCGTCGGCGCATATTGCGGTGGTATGATGCTGACGCTGGGGCTGGCA
TATAATTACGTGGCGCTGCCTGCCGCCCTGCTTTCGTTTGCTGCGATGTCGTCGTTGCTGCTGTATGGTCGCTATAAGCGCCAGCAAGCGGCGGATAGTC
CGGTGCTGGCGAAACCAGTGGGGTAGATTGCAGCCACGGTGCACGTTGCTTATTGCCGGATGCGGCGTGAACACCTTATCCGGCCTACGGGTTGCTCATT
TTGTAGGCCTGATAAGACGCGGCAAGCGTCGCATCAGGCATGATGCACCAATTGCCTGGTTTTTTACTCTTGTGGCCATAACCACGCAGCGCCGCGTACG
CCGCTCGAATCACCATGTTTCGCCTTGTGTACCGGCGTTTCACATTCTCCGCCGAAGACAAATTGTTTAATCAACTGCGGAACCGTTTGATATAAACGGT
CTACATTGCTCATTCCGCCGCCCAGGACAATCACATCCGGATCGAGAATATTCACGACATGTGCCAGCGATTTTGCCAGCCGCAGCTCGTAGCGACGCAA
TGCCAGTTCCGCTACCGGATCGCTTTCTTCAACCAGGCGGATAATTTCACTGCCTTTCAGCGCATGTCCGCTCAAACGACGATAATCCGTCGCGAATCCC
GTGCCTGAAATAAAGGTTTCAATACAACCTTGTTTACCGCAATAACAAGGGACTTCCTCGCGATAACGCAGTTCGTCTTCGTCCATCCACGGTAGCGGAT
TGTGTCCCCACTCGCCTGCCGTGCCATTGCCACCGATATGCGCCCGCCCATTGAATGCCACGCCCGCGCCGCATCCCGTGCCGATAATCACGGCAAATAC
CGTCTGCGCTCCCGCTGCCGCGCCATCTACCGCTTCTGAAACCGCCAGACAGTTGGCGTCATTTGCCAGCCGCACTTCCCGCTGCAACCGCGCGCTTAAG
TCTTTATCGAATGGCTGACCGTTGAGCCAGGTTGAATTGGCATTCTTCACCACGCCGGTGTAGGGCGAAATCGAACCTGGAATGCCCATACCTACCGTTC
CGCGCTGCCCTGTTGCCTGCTCCGCCATATCAACCAACGTGGCGATCGTTTCAATAGTCTGCCGGTAATCATCACGCGGCGTGGGCAGACGATGGCGGTA
CAACTGCTCCCTGCATCGCCCAATGCAATCACTTCAGTTTTGGTGCCGCCTAAATCGATACCTATACGCACGGTACTCTCCTTATTTTTTTCAATATCAA
TAGCGTAGAGACGGACAACCGGATTGGCAATGCAAGCCCGCCGACAATTCGTTATCATGCCCGCTAAATTTAACGACAAGGCCGTGGAAATTATCATGCT
GTGGTTCAAAAATTTAATGGTTTACCGTCTTAGCCGCGAGATTTCGCTGCGTGCAGAAGAGATGGAAAAGCAGCTAGCCTCGATGGCATTTACCCCATGC
GGCAGCCAGGACATGGCGAAGATGGGCTGGGTTCCTCCGATGGGATCGCACAGCGATGCGTTAACGCACGTTGCCAATGGTCAAATTGTTATCTGCGCGC
GCAAAGAAGAAAAAATCCTCCCGTCTCCGGTGATTAAACAGGCGCTGGAAGCGAAAATCGCCAAACTGGAAGCGGAACAGGCGCGTAAGCTGAAGAAAAC
CGAAAAAGATTCGCTGAAAGACGAAGTGCTGCACTCTCTGCTACCGCGTGCTTTCAGCCGTTTTAGCCAGACAATGATGTGGATCGACACGGTTAACGGT
TTGATTATGGTGGACTGCGCCAGTGCCAAAAAAGCGGAAGATACGCTGGCACTGCTGCGTAAAAGCCTGGGGTCGTTACCGGTTGTACCATTGAGCATGG
AAAACCCGATTGAACTGACGCTGACCGAATGGGTTCGCTCCGGCAGCGCGGCACAGGGCTTCCAGCTGCTTGATGAAGCCGAGCTGAAATCGCTGCTGGA
AGATGGTGGAGTGATCCGCGCGAAGAAACAAGATCTGACCAGCGAAGAGATCACCAATCACATCGAAGCCGGAAAAGTGGTGACTAAACTGGCGCTCGAC
TGGCAGCAGCGCATTCAGTTTGTGATGTGCGACGATGGTTCGCTCAAGCGTCTGAAGTTCTGCGACGAGCTGCGCGATCAAAACGAAGATATCGACCGTG
AAGATTTCGCCCAGCGTTTTGATGCCGATTTCATCCTGATGACTGGTGAACTGGCAGCGTTAATTCAAAACCTGATTGAAGGATTAGGTGGCGAAGCACA
ACGTTAATTGCTGATTTACCTTTAATGCCGGATGCGACGCCTGCCGCGTCTTATCCGGCGTACGAAGCTACACCAGGCATATAATTATTCGCTACGGCGG
GCAATAATTTTTAGCGCAGCAATATTATGCGTTTTACGCTGTAACTTGCTCCAGGGGCGTTGTGTCATTGTTTTCCTCAAGCCGGTGACGCGCTTCACTG
CGAATTTTCCGCGTTGCCCCGGTTTTCACTAAATCCCGTAACTGCGAAAGAGCGGGTTGATCGACAAATAAAAGTAATGATGGCTCCTCTTTTAGCCACA
CCGTTTTCACATCGGCAGCCAGCTGTGGATTATTAATAGCCAGCGACCGATCCTGAGACTCAGTCAATGTCGTTAACAACACCGGGGTATGTGCGTTGCG
CAATGCCGTTTGGCGCAAATGATCATTGCGACTTTGCAGCAATGCACGCCACCATTCATCATCTGATTTATCTTTTATCGTCGCCAGTTCCGCAACAATA
TCTGGAGATCTTCGCTGATATTTATATCAACCTTGATGAATTATGAATATATCGGAAATCGAAAAAATCGCAGCAAAGGAAATATTATTATGGGTTTATG
AGAGGACATTTCAGAAAAATGCCCTCCCGTTCATGGGGAAGGCGAGGAATTACAGATAGCGGCACAGATAAGAGGTGGGTTCGGCAACTTGCAGATGAAA
CTCGCTGTGACCGGGAACATTAAACACCGAACCGGCTTCATACACTTGCCAGTCGGTCGCGTCAGGCAGTAACACATTCAGCGCACCACTGATTACCGTC
ATCTCTTCAGGCTCAGCGGTGCTGAAGGTGTATTCACCTTCAACCATAACACCCACGCTGGCGCGACCAGTGCTGCTGCTGGAAAAGCCGATCGATTTCA
CTTTGCCGGAAAAGTACTCATTACTTTGAAGCATAAACTGGCCCTGTCTGATAGTTGAACATCTACTTCACTATAGGGGCCAGAGGCGCTGGCTGTCACG
CAAAATTACACCAGTAATTCCGCAGCCAGCCGTGCAATCAATACGTTAGAGAGCAAGACAGTAACATCGAGCTGTTTTTGCAGTAAATCGCGATGACGCT
GGTTAAATCCCAAACAATCCAGCATGATGACATCAGCCCCTTTTGCCAGTAATTCTTTCCCGGCATCAATGATTTTTTGTTCCGAATCATGAATGGGGTT
ACCCAATGAAAATACTGGCGGTTTCTGCAAAATTTGCCATTTTTGCGCCTGAACGGTCAGCAACTCCTCAACCGGTACGATAACCCCCACCTGATGATCT
TCAACAATAGAGGAAACCAGCGGTGGCAATATCCGCGACGGCTCAAGAAAGATCGTATTACGCGCGGTCATACTACTAATGTTTGCTGTACTCATTAATA
TAATGACGTCGTAACCCTGATTATCGAGCACTTCAACCACACCTTGCAGGTCTCGCTCCACTTTGCGACGCGAAACATGGGCCAGCTGGTTGTCATTTAA
TAATGTGAGAATTGTGTCTTCGCCTGCTTCTGGCGCGTACTCCGCCATCACTTCTTCGCGGCTTAACTTCCCCAGCAGGCTATGATGGGAAATATTATCT
TCGTCAATGTATTCTGTCAGGAGCGGCAAAACTTCCTGCATAGGTACAATGCCGATAGTCAGGATCGCCAACGACGCACTCATTGTTCTTCCACCTTACT
TTTATTTCGTCGTTAATTACCGGGCAAGTGTTAAGCACCACTGCTGACACTTACTTGTGCTACAAATGACAAAAAGCGTAGCAGCAGACCTGCACTGCAT
AATGTAAAGATTCCAAATGATTCCAGTAATGGATTGTTATTGTTTAATATTCTAATTATTTGAAAAACATGAATTGTGAAAAATGTGACGCAGATCCCTT
GTGGCGGCACTCAGAATCCCTTCCGAGCAGTCTGATGCGGTCACTCTTTGTCAGGGTCCTCATAGCGTTTTTTCGCATCCATCGCTTCCTGAGCGGTCGG
ATGTTCACTGATCAACGAGTCTGGTTTAGGATGATCGGCTCTGAGTTGGTACCAGGTTACCGTCTGTCCTGGCTTTCCTTTTTCAATCGTCACTATATAT
GCTTCACGAGGATAAGGCGGTTTCGTTGGCATCGTTCTTCCTTATTTCACGGGATGAACGTTAAGTATAGGCGCTCGAAAATCAACAATTGATCGTCTGT
GCCAGAGCGCTGCGAATTTCAGAAATCACCTGGCTGGGTTCGTTTGTTGCGTCGATGATAATATGCGCAACTTCGCGATATAGCGCATCGCGTTCTTCCA
GCACTTCCTGAACTTCTTCGCTCAGTGGTTTTCCCGTTAAGGTTGGTCGTAAATCTTCTTCCGGTGCAGCTTGCAGTCGGTTAACCAGGACTGATACTGG
CGCACACAAATAAACCACGATCCCGTTATTTTGCATGAAGTGACGATTAAATTCCGTCAGAATAATGCCGCCGCCCGTGGCGATAACGGTGGATGGCGCA
GTTACCGCTTCCAGTGCCGCCGTTTCTCTGGCGCGGAATCCCGCCCACTCTTCCCTTTCGACGATCTCCGCGACCGTCATATTGAGCTGTGATTGCAACC
ACTGGTCGGTATCGACAAACCGACGGTTAAGCGAATCGGCAAGGGCCATTCCGACCGTTGTTTTACCACAGCCCCGAGGCCCGATCAGAAAAAGAGGTTG
TGTCATCGTGGGTTTTCCCCAATAGGTCGCAATGCGGCGAAAGCCGGTGTCATGAGAATAGCGATCATACCATCAAACTAGTACAATTTCGATTGTAAAG
AAAAATTCCACTTAAAGTGAAAACCTCAATACATCCCTTACTATACCAATAAATATTCAAGAATGAAGTGTAAATAATAAATTACATTTAGCCACGACTA
CGTTGCGCTTCCAGCCACCACTTCTCCAGCTCCGCAGCAAAGGCCTGGCGGTCACGTTGTGAAAGACTATCTGGTCCTCCGGTCTGGATCCCACTGGCAC
GTAAGGTATCCATAAAATCGCGCATCGTCAGGCGCTCACGAATGGTCGCTGGCGTATAACGTTCGCCGCGCGGATTAAGCGCCGCCGCGCCTTTCTCGAT
GGCTTCAGCAGCCAAAGGTATATCTGCGGTGATCACCAAATCGCCCGCTTCACACTGCCGAACAATTTCGTTATCGGCAACGTCGAAACCTGCCGCGACG
CGCAGCGTACGAATAAATCGTGATGGCGGCACGCGTAAACTCTGGTTTGCTACCAGTACCAGCGGCATCTGCATACGTTCCGCCGCGCGATACAAAATCT
CTTTAATTACATTGGGACACGCGTCGGCATCCACCCAAATTGTCATAAAGTCATCCTTTGTTGGGTAATCCTCTATTGTGTCGCGCTTTTGCCTTCCGGC
[truncated: 4,939,577 more chars]
